# Supplementary material
Source: PubMed Central journal article supplement (PMC10116384)

## Supplemental Online Content

Amin N, Liu J, Bonnechere B, et al. Interplay of metabolome and gut microbiome in individuals with major depressive disorder vs control individuals. *JAMA Psychiatry*. Published online April 19, 2023. doi:10.1001/jamapsychiatry.2023.0685

### **eMethods.**

**eTable 1.** Results for all models for Lifetime MDD

**eTable 2.** Results of sensitivity analysis

**eTable 3.** Significant Findings and replication in BBMRI-NL Study

**eTable 4.** Novel Findings of the study

**eTable 5.** Results of replication in the PReDICT study

**eTable 6.** Results of Mendelian Randomization analysis

**eTable 7.** Results of horizontal pleiotropy in MR

**eTable 8.** Results of Heterogeneity test in Mendelian Randomization

**eTable 9.** Correlation between MDD and Microbiome metabolic signatures

**eFigure 1.** Results of metabolome-wide association analysis

**eFigure 2.** Results of metabolome-wide association analysis for lifetime MDD and recurrent MDD for model 1

**eFigure 3.** Results of metabolome-wide association analysis for lifetime MDD and recurrent MDD for model 2

**eFigure 4.** Results of metabolome-wide association analysis for lifetime MDD and recurrent MDD for model 3

**eFigure 5.** Results of metabolome-wide association analysis for lifetime MDD and recurrent MDD for model 4

**eFigure 6.** Correlation structure of 124 metabolites associated with lifetime major depression

**eFigure 7.** Scatter plot of effect estimates (MDD) from model 4 and sensitivity analysis by removing individuals on antidepressants

**eFigure 8.** Significantly associated metabolites with MDD in model 4 and the results of replication in BBMRI-NL study

**eFigure 9.** Results of Mendelian Randomization for the 124 associated metabolites in model 4

**eFigure 10.** Scatter plot of direct and proxy association of microbiome with major depression

**eFigure 11.** Hierarchical illustration of all healthy and pathogenic bacteria that showed significant correlation ( $r > 0.3$  &  $FDR < 0.05$ ) with MDD metabolic profile

This supplemental material has been provided by the authors to give readers additional information about their work.

## eMethods

### UKB Definition of covariates

The covariates considered in the analysis included baseline age, sex, ethnicity, fasting time, assessment center, lifestyle factors including body mass index (BMI), smoking status, alcohol intake frequency, education and status regarding multiple medication from touchscreen or verbal interview and technical variables during the NMR measurement, i.e., batch and spectrometer. Fasting time was defined as the time interval between the consumption of food or drink and blood sampling and natural log-transformed. Ethnicity was categorized to White, Asian (excluding Chinese), Black, Chinese, mixed and others. Smoking status was categorized to never, previous and current. Alcohol intake frequency was categorized to 1) daily or almost daily, 2) three to four times a week, 3) once or twice a week, 4) less than once a week. Education was categorized to 1) College or University degree, 2) A levels, advanced subsidiary (AS) levels or equivalent, 3) Certificated of secondary education (CSEs) or equivalent, 4) National vocational qualification (NVQ) or higher national diploma (HND) or higher national certificate (HNC) or equivalent, 5) O levels, general certificate of secondary education (GCSEs) or equivalent, 6) Other professional qualifications, and 7) none of the above based on the highest qualification. Information for those who chose “prefer not to answer”, was put as missing. Medication status was based on the medication codes collected from the verbal interview which were further coded to Anatomical Therapeutic Chemical (ATC) codes. The medications considered in the covariates were selected based on our previous publication<sup>1</sup>, including five anti-hypertensives (C08, C09, C07, C03 and C02), anti-diabetes (metformin and other anti-diabetes under A10), lipid-lowering drugs (C10), digoxin (C01AA), anti-thrombotic (B01AC06), proton pump inhibitors (PPI, A02BC), hypnotics and sedatives (N05) and antidepressants (N06).

### Imputation of missing values in the covariates

Fast imputation of missing values by chained random forests was performed through the R package *missRanger* to impute the missing values for the shared covariates, including smoking status, BMI, alcohol intake frequency, education, and ethnicity. The information used in the imputation included baseline age, sex, smoking status, pack-years of smoking, alcohol intake frequency, physical activity from International Physical Activity Questionnaire (IPAQ) groups, ethnicity, BMI, education, blood pressure and waist-hip ratio. In brief, the large matrix was imputed with maximum of ten chaining

interactions and 200 trees and weighted by the number of non-missing values; three candidate non-missing values were selected from in the predictive mean matching steps.

### **Metabolite profiling**

The metabolites were measured in plasma using the targeted high-throughput <sup>1</sup>H-NMR metabolomics platform of Nightingale (Nightingale Health Ltd; biomarker quantification version 2020)<sup>2,3</sup> which includes 249 metabolites. They include clinical lipids, lipoprotein subclass profiling with lipid concentrations within 14 subclasses, fatty acid composition, and various low-molecular weight metabolites such as amino acids, ketone bodies and glycolysis metabolites quantified in molar concentration units. The technology is based a standardized protocol of sample quality control and sample preparation, data storage and automated spectral analyses.

The data obtained from the baseline sampling was used<sup>2</sup>. For the samples with repeated measurements of the metabolites, one of the values was extracted at random. The metabolite values which were suggested to be technical errors in the quality control provided by Nightingale Health during the measurement procedure were treated as missing. A natural logarithm transformation of each metabolite was performed for the analysis. The zero values were replaced by the lowest value except for zero. Finally the transformed values were scaled to standard deviation units.

### **PREdict Study Design and Participants**

This study examined serum samples from the Predictors of Remission in Depression to Individual and Combined Treatments (PREdict) study; the design and clinical outcomes of PREdict have been detailed previously<sup>4,5</sup>. Briefly, the PREdict study aimed to identify predictors and moderators of response to 12 weeks of randomly-assigned treatment with duloxetine (30-60 mg/day), escitalopram (10-20 mg/day) or cognitive behavior therapy (CBT, 16 one-hour individual sessions). Eligible participants were adults aged 18-65 with an active major depressive episode without psychotic features as part of MDD who had never previously been treated for depression. Severity of depression at the randomization visit was assessed with the 17-item Hamilton Depression Rating Scale (HRSD17)<sup>6</sup>. Eligibility required a HRSD17 score  $\geq 18$  at the screening visit and  $\geq 15$  at the randomization visit, indicative of moderate-to-severe depression. Active significant suicide risk, current illicit drug use (assessed with urine drug screen) or a history of substance abuse in

the three months prior to randomization, pregnancy, lactation, and uncontrolled general medical conditions were all exclusionary.

### *Metabolite Profiling*

At the randomization visit, antecubital phlebotomy was performed without concern for time of day or fasting status to obtain the serum samples used in the current analysis. Blood samples were allowed to clot for 20 minutes, then centrifuged at 4C for 10 minutes. The serum was pipetted into Eppendorf tubes and immediately frozen at -80C until ready for metabolomic analysis.

Using targeted metabolomics protocols and profiling protocols established in previous studies, citric acid and fatty acids were quantified by ultra-performance liquid chromatography triple quadrupole mass spectrometry (UPLC-TQMS) (Waters XEVO TQ-S, Milford, USA). A targeted, liquid chromatography–electrochemical coulometric array (LCECA) metabolomics platform<sup>7</sup> was used to assay metabolites in serum samples. This platform was used to identify and quantify 35 metabolites including pyruvate and primarily neurotransmitter-related to tryptophan, tyrosine, and tocopherol pathways.

### *Statistical Analysis*

Linear regression models were used to assess the cross-sectional association of selected metabolites with the 17-item Hamilton Rating Scale for Depression (HRSD17) and 14-items Hamilton Rating Scale for Anxiety (HRSA). The outcome variable was square root of the HRSD17 and HRSA and covariates include age, sex and BMI.

### *Results*

Lower levels of pyruvate and higher levels of citric acid and EPA were associated with less-severe depression and/or anxiety. DHA along with other PUFAs were showing similar trends as EPA (i.e., higher levels of PUFAs associated or trended with less severe depression and/or anxiety).

## References:

1. Liu J, Lahousse L, Nivard MG, et al. Integration of epidemiologic, pharmacologic, genetic and gut microbiome data in a drug-metabolite atlas. *Nat Med*. Jan 2020;26(1):110-117. doi:10.1038/s41591-019-0722-x
2. Ritchie SC, Surendran P, Karthikeyan S, et al. Quality control and removal of technical variation of NMR metabolic biomarker data in ~120,000 UK Biobank participants. *medRxiv*. 2021:2021.09.24.21264079. doi:10.1101/2021.09.24.21264079
3. Julkunen H, Cichonska A, Slagboom PE, Wurtz P, Nightingale Health UKBI. Metabolic biomarker profiling for identification of susceptibility to severe pneumonia and COVID-19 in the general population. *Elife*. May 4 2021;10doi:10.7554/eLife.63033
4. Dunlop BW, Kelley ME, Aponte-Rivera V, et al. Effects of Patient Preferences on Outcomes in the Predictors of Remission in Depression to Individual and Combined Treatments (PREdict) Study. *Am J Psychiatry*. Jun 1 2017;174(6):546-556. doi:10.1176/appi.ajp.2016.16050517
5. Dunlop BW, Binder EB, Cubells JF, et al. Predictors of remission in depression to individual and combined treatments (PREdict): study protocol for a randomized controlled trial. *Trials*. Jul 9 2012;13:106. doi:10.1186/1745-6215-13-106
6. Hamilton M. A rating scale for depression. *J Neurol Neurosurg Psychiatry*. Feb 1960;23(1):56-62. doi:10.1136/jnnp.23.1.56
7. Matson WR, Langlais P, Volicer L, Gamache PH, Bird E, Mark KA. n-Electrode three-dimensional liquid chromatography with electrochemical detection for determination of neurotransmitters. *Clin Chem*. Sep 1984;30(9):1477-88.



















eTable 2. Results of sensitivity analysis

| metabolite     | Life time MDD |        |         |          |            |          | Recurrent MDD |        |         |          |            |          |
|----------------|---------------|--------|---------|----------|------------|----------|---------------|--------|---------|----------|------------|----------|
|                | beta          | se     | z       | pvalue   | n          | fdr      | beta          | se     | z       | pvalue   | n          | fdr      |
| Total_C        | -0.0399       | 0.0185 | -2.1550 | 3.12E-02 | 5498/51404 | 5.88E-02 | -0.0444       | 0.0219 | -2.0252 | 4.28E-02 | 3491/61782 | 8.75E-02 |
| non_HDL_C      | -0.0110       | 0.0178 | -0.6167 | 5.37E-01 | 5498/51404 | 6.66E-01 | -0.0160       | 0.0211 | -0.7579 | 4.49E-01 | 3491/61782 | 5.76E-01 |
| Remnant_C      | -0.0047       | 0.0179 | -0.2633 | 7.92E-01 | 5498/51404 | 8.77E-01 | -0.0077       | 0.0212 | -0.3649 | 7.15E-01 | 3491/61782 | 7.85E-01 |
| VLDL_C         | 0.0325        | 0.0172 | 1.8847  | 5.95E-02 | 5498/51404 | 1.05E-01 | 0.0317        | 0.0204 | 1.5497  | 1.21E-01 | 3491/61782 | 2.10E-01 |
| Clinical_LDL_C | -0.0230       | 0.0178 | -1.2916 | 1.97E-01 | 5498/51404 | 2.95E-01 | -0.0302       | 0.0210 | -1.4414 | 1.49E-01 | 3491/61782 | 2.40E-01 |
| LDL_C          | -0.0122       | 0.0133 | -0.9194 | 3.58E-01 | 5498/51404 | 4.77E-01 | -0.0180       | 0.0140 | -1.2801 | 2.00E-01 | 3491/61782 | 2.99E-01 |
| HDL_C          | -0.0926       | 0.0200 | -4.6165 | 3.90E-06 | 5498/51404 | 2.94E-05 | -0.0974       | 0.0240 | -4.0644 | 4.82E-05 | 3491/61782 | 7.07E-04 |
| Total_TG       | 0.0766        | 0.0175 | 4.3792  | 1.19E-05 | 5498/51404 | 6.31E-05 | 0.0744        | 0.0207 | 3.5906  | 3.30E-04 | 3491/61782 | 1.61E-03 |
| VLDL_TG        | 0.0824        | 0.0177 | 4.6599  | 3.16E-06 | 5498/51404 | 2.89E-05 | 0.0797        | 0.0210 | 3.7989  | 1.45E-04 | 3491/61782 | 1.09E-03 |
| LDL_TG         | 0.0382        | 0.0171 | 2.2415  | 2.50E-02 | 5498/51404 | 4.94E-02 | 0.0406        | 0.0201 | 2.0160  | 4.38E-02 | 3491/61782 | 8.87E-02 |
| HDL_TG         | 0.0556        | 0.0166 | 3.3430  | 8.29E-04 | 5498/51404 | 2.43E-03 | 0.0513        | 0.0197 | 2.6098  | 9.06E-03 | 3491/61782 | 2.48E-02 |
| Total_PL       | -0.0266       | 0.0183 | -1.4508 | 1.47E-01 | 5498/51404 | 2.36E-01 | -0.0301       | 0.0217 | -1.3882 | 1.65E-01 | 3491/61782 | 2.60E-01 |
| VLDL_PL        | 0.0541        | 0.0172 | 3.1359  | 1.71E-03 | 5498/51404 | 4.59E-03 | 0.0524        | 0.0204 | 2.5670  | 1.03E-02 | 3491/61782 | 2.72E-02 |
| LDL_PL         | -0.0160       | 0.0175 | -0.9112 | 3.62E-01 | 5498/51404 | 4.77E-01 | -0.0221       | 0.0208 | -1.0640 | 2.87E-01 | 3491/61782 | 4.07E-01 |
| HDL_PL         | -0.0575       | 0.0193 | -2.9822 | 2.86E-03 | 5498/51404 | 6.99E-03 | -0.0627       | 0.0230 | -2.7228 | 6.47E-03 | 3491/61782 | 1.83E-02 |
| Total_CE       | -0.0450       | 0.0186 | -2.4158 | 1.57E-02 | 5498/51404 | 3.31E-02 | -0.0501       | 0.0220 | -2.2732 | 2.30E-02 | 3491/61782 | 5.21E-02 |
| VLDL_CE        | 0.0228        | 0.0173 | 1.3139  | 1.89E-01 | 5498/51404 | 2.85E-01 | 0.0222        | 0.0206 | 1.0814  | 2.80E-01 | 3491/61782 | 4.07E-01 |
| LDL_CE         | -0.0085       | 0.0131 | -0.6485 | 5.17E-01 | 5498/51404 | 6.50E-01 | -0.0148       | 0.0138 | -1.0710 | 2.84E-01 | 3491/61782 | 4.07E-01 |
| HDL_CE         | -0.0929       | 0.0200 | -4.6400 | 3.48E-06 | 5498/51404 | 2.89E-05 | -0.0987       | 0.0239 | -4.1224 | 3.75E-05 | 3491/61782 | 6.67E-04 |
| Total_FC       | -0.0267       | 0.0183 | -1.4615 | 1.44E-01 | 5498/51404 | 2.33E-01 | -0.0298       | 0.0217 | -1.3738 | 1.70E-01 | 3491/61782 | 2.65E-01 |
| VLDL_FC        | 0.0453        | 0.0172 | 2.6292  | 8.56E-03 | 5498/51404 | 1.95E-02 | 0.0443        | 0.0204 | 2.1682  | 3.01E-02 | 3491/61782 | 6.42E-02 |
| LDL_FC         | -0.0228       | 0.0145 | -1.5733 | 1.16E-01 | 5498/51404 | 1.92E-01 | -0.0268       | 0.0152 | -1.7692 | 7.69E-02 | 3491/61782 | 1.47E-01 |
| HDL_FC         | -0.0862       | 0.0199 | -4.3334 | 1.47E-05 | 5498/51404 | 7.03E-05 | -0.0885       | 0.0237 | -3.7284 | 1.93E-04 | 3491/61782 | 1.16E-03 |
| Total_L        | -0.0061       | 0.0177 | -0.3454 | 7.30E-01 | 5498/51404 | 8.37E-01 | -0.0101       | 0.0209 | -0.4811 | 6.30E-01 | 3491/61782 | 7.32E-01 |
| VLDL_L         | 0.0625        | 0.0174 | 3.5965  | 3.23E-04 | 5498/51404 | 1.10E-03 | 0.0601        | 0.0206 | 2.9194  | 3.51E-03 | 3491/61782 | 1.15E-02 |
| LDL_L          | -0.0132       | 0.0175 | -0.7532 | 4.51E-01 | 5498/51404 | 5.79E-01 | -0.0195       | 0.0207 | -0.9383 | 3.48E-01 | 3491/61782 | 4.66E-01 |
| HDL_L          | -0.0697       | 0.0195 | -3.5655 | 3.63E-04 | 5498/51404 | 1.22E-03 | -0.0745       | 0.0233 | -3.1936 | 1.41E-03 | 3491/61782 | 4.94E-03 |
| Total_P        | -0.0438       | 0.0186 | -2.3523 | 1.87E-02 | 5498/51404 | 3.81E-02 | -0.0528       | 0.0221 | -2.3869 | 1.70E-02 | 3491/61782 | 4.03E-02 |
| VLDL_P         | 0.0402        | 0.0171 | 2.3537  | 1.86E-02 | 5498/51404 | 3.81E-02 | 0.0398        | 0.0202 | 1.9665  | 4.92E-02 | 3491/61782 | 9.81E-02 |
| LDL_P          | -0.0021       | 0.0175 | -0.1187 | 9.05E-01 | 5498/51404 | 9.45E-01 | -0.0045       | 0.0208 | -0.2140 | 8.31E-01 | 3491/61782 | 8.65E-01 |
| HDL_P          | -0.0461       | 0.0187 | -2.4631 | 1.38E-02 | 5498/51404 | 2.98E-02 | -0.0561       | 0.0222 | -2.5211 | 1.17E-02 | 3491/61782 | 3.03E-02 |
| VLDL_size      | 0.0921        | 0.0184 | 5.0037  | 5.62E-07 | 5498/51404 | 1.50E-05 | 0.0866        | 0.0219 | 3.9588  | 7.53E-05 | 3491/61782 | 8.96E-04 |
| LDL_size       | -0.0032       | 0.0173 | -0.1858 | 8.53E-01 | 5498/51404 | 9.19E-01 | -0.0123       | 0.0206 | -0.5982 | 5.50E-01 | 3491/61782 | 6.64E-01 |
| HDL_size       | -0.0956       | 0.0196 | -4.8834 | 1.04E-06 | 5498/51404 | 1.73E-05 | -0.0892       | 0.0234 | -3.8128 | 1.37E-04 | 3491/61782 | 1.09E-03 |
| Phosphoglyc    | -0.0195       | 0.0182 | -1.0709 | 2.84E-01 | 5495/51357 | 3.94E-01 | -0.0251       | 0.0215 | -1.1662 | 2.44E-01 | 3489/61726 | 3.59E-01 |
| TG_by_PG       | 0.1022        | 0.0187 | 5.4688  | 4.53E-08 | 5495/51357 | 4.43E-06 | 0.1029        | 0.0223 | 4.6224  | 3.79E-06 | 3489/61726 | 3.80E-04 |
| Cholines       | -0.0291       | 0.0185 | -1.5745 | 1.15E-01 | 5495/51357 | 1.92E-01 | -0.0348       | 0.0219 | -1.5880 | 1.12E-01 | 3489/61726 | 1.97E-01 |
| Phosphatidylc  | -0.0194       | 0.0184 | -1.0540 | 2.92E-01 | 5495/51357 | 3.99E-01 | -0.0246       | 0.0218 | -1.1263 | 2.60E-01 | 3489/61726 | 3.81E-01 |
| Sphingomyelins | -0.0636       | 0.0189 | -3.3583 | 7.84E-04 | 5495/51357 | 2.32E-03 | -0.0720       | 0.0225 | -3.2056 | 1.35E-03 | 3489/61726 | 4.86E-03 |
| ApoB           | -0.0016       | 0.0176 | -0.0890 | 9.29E-01 | 5498/51404 | 9.56E-01 | -0.0041       | 0.0209 | -0.1962 | 8.44E-01 | 3491/61782 | 8.76E-01 |
| ApoA1          | -0.0575       | 0.0191 | -3.0026 | 2.68E-03 | 5498/51404 | 6.67E-03 | -0.0645       | 0.0228 | -2.8255 | 4.72E-03 | 3491/61782 | 1.45E-02 |
| ApoB_by_ApoA1  | 0.0278        | 0.0178 | 1.5631  | 1.18E-01 | 5498/51404 | 1.95E-01 | 0.0290        | 0.0212 | 1.3718  | 1.70E-01 | 3491/61782 | 2.65E-01 |
| Total_FA       | 0.0238        | 0.0172 | 1.3832  | 1.67E-01 | 5495/51357 | 2.64E-01 | 0.0191        | 0.0204 | 0.9352  | 3.50E-01 | 3489/61726 | 4.66E-01 |
| Unsaturation   | -0.0580       | 0.0185 | -3.1438 | 1.67E-03 | 5495/51357 | 4.51E-03 | -0.0506       | 0.0220 | -2.3011 | 2.14E-02 | 3489/61726 | 4.93E-02 |







|                 |         |        |         |          |            |          |         |        |         |          |            |          |
|-----------------|---------|--------|---------|----------|------------|----------|---------|--------|---------|----------|------------|----------|
| M_LDL_FC        | -0.0165 | 0.0143 | -1.1538 | 2.49E-01 | 5498/51404 | 3.54E-01 | -0.0230 | 0.0153 | -1.5060 | 1.32E-01 | 3491/61782 | 2.21E-01 |
| M_LDL_TG        | 0.0422  | 0.0172 | 2.4596  | 1.39E-02 | 5498/51404 | 2.99E-02 | 0.0444  | 0.0203 | 2.1887  | 2.86E-02 | 3491/61782 | 6.20E-02 |
| S_LDL_P         | -0.0020 | 0.0174 | -0.1122 | 9.11E-01 | 5498/51404 | 9.45E-01 | -0.0025 | 0.0207 | -0.1215 | 9.03E-01 | 3491/61782 | 9.26E-01 |
| S_LDL_L         | -0.0059 | 0.0174 | -0.3409 | 7.33E-01 | 5498/51404 | 8.37E-01 | -0.0096 | 0.0206 | -0.4657 | 6.41E-01 | 3491/61782 | 7.36E-01 |
| S_LDL_PL        | -0.0186 | 0.0174 | -1.0688 | 2.85E-01 | 5498/51404 | 3.94E-01 | -0.0187 | 0.0206 | -0.9082 | 3.64E-01 | 3491/61782 | 4.77E-01 |
| S_LDL_C         | -0.0076 | 0.0134 | -0.5646 | 5.72E-01 | 5498/51404 | 6.92E-01 | -0.0137 | 0.0142 | -0.9657 | 3.34E-01 | 3491/61782 | 4.56E-01 |
| S_LDL_CE        | -0.0026 | 0.0137 | -0.1893 | 8.50E-01 | 5498/51404 | 9.19E-01 | -0.0098 | 0.0146 | -0.6763 | 4.99E-01 | 3491/61782 | 6.24E-01 |
| S_LDL_FC        | -0.0195 | 0.0144 | -1.3490 | 1.77E-01 | 5498/51404 | 2.76E-01 | -0.0235 | 0.0153 | -1.5303 | 1.26E-01 | 3491/61782 | 2.12E-01 |
| S_LDL_TG        | 0.0578  | 0.0174 | 3.3242  | 8.87E-04 | 5498/51404 | 2.57E-03 | 0.0591  | 0.0205 | 2.8757  | 4.03E-03 | 3491/61782 | 1.27E-02 |
| XL_HDL_P        | -0.0991 | 0.0193 | -5.1356 | 2.81E-07 | 5498/51404 | 1.17E-05 | -0.0870 | 0.0232 | -3.7509 | 1.76E-04 | 3491/61782 | 1.15E-03 |
| XL_HDL_L        | -0.0960 | 0.0194 | -4.9519 | 7.35E-07 | 5498/51404 | 1.53E-05 | -0.0820 | 0.0231 | -3.5445 | 3.93E-04 | 3491/61782 | 1.75E-03 |
| XL_HDL_PL       | -0.0522 | 0.0166 | -3.1483 | 1.64E-03 | 5498/51404 | 4.49E-03 | -0.0374 | 0.0205 | -1.8261 | 6.78E-02 | 3491/61782 | 1.32E-01 |
| XL_HDL_C        | -0.1028 | 0.0190 | -5.4135 | 6.18E-08 | 5498/51404 | 4.43E-06 | -0.0862 | 0.0226 | -3.8125 | 1.38E-04 | 3491/61782 | 1.09E-03 |
| XL_HDL_CE       | -0.0826 | 0.0173 | -4.7823 | 1.73E-06 | 5498/51404 | 2.39E-05 | -0.0710 | 0.0209 | -3.4026 | 6.67E-04 | 3491/61782 | 2.60E-03 |
| XL_HDL_FC       | -0.0839 | 0.0171 | -4.8953 | 9.82E-07 | 5498/51404 | 1.73E-05 | -0.0700 | 0.0202 | -3.4709 | 5.19E-04 | 3491/61782 | 2.15E-03 |
| XL_HDL_TG       | 0.0167  | 0.0167 | 1.0022  | 3.16E-01 | 5498/51404 | 4.30E-01 | 0.0187  | 0.0197 | 0.9509  | 3.42E-01 | 3491/61782 | 4.62E-01 |
| L_HDL_P         | -0.0941 | 0.0199 | -4.7252 | 2.30E-06 | 5498/51404 | 2.39E-05 | -0.0847 | 0.0238 | -3.5544 | 3.79E-04 | 3491/61782 | 1.72E-03 |
| L_HDL_L         | -0.0960 | 0.0203 | -4.7333 | 2.21E-06 | 5498/51404 | 2.39E-05 | -0.0907 | 0.0242 | -3.7452 | 1.80E-04 | 3491/61782 | 1.15E-03 |
| L_HDL_PL        | -0.0880 | 0.0200 | -4.3929 | 1.12E-05 | 5498/51404 | 6.06E-05 | -0.0867 | 0.0243 | -3.5622 | 3.68E-04 | 3491/61782 | 1.72E-03 |
| L_HDL_C         | -0.0930 | 0.0194 | -4.7878 | 1.69E-06 | 5498/51404 | 2.39E-05 | -0.0883 | 0.0235 | -3.7566 | 1.72E-04 | 3491/61782 | 1.15E-03 |
| L_HDL_CE        | -0.0924 | 0.0195 | -4.7426 | 2.11E-06 | 5498/51404 | 2.39E-05 | -0.0884 | 0.0236 | -3.7493 | 1.77E-04 | 3491/61782 | 1.15E-03 |
| L_HDL_FC        | -0.0856 | 0.0188 | -4.5455 | 5.48E-06 | 5498/51404 | 3.50E-05 | -0.0790 | 0.0229 | -3.4503 | 5.60E-04 | 3491/61782 | 2.25E-03 |
| L_HDL_TG        | 0.0079  | 0.0168 | 0.4724  | 6.37E-01 | 5498/51404 | 7.48E-01 | 0.0060  | 0.0199 | 0.3032  | 7.62E-01 | 3491/61782 | 8.19E-01 |
| M_HDL_P         | -0.0629 | 0.0181 | -3.4851 | 4.92E-04 | 5498/51404 | 1.55E-03 | -0.0761 | 0.0210 | -3.6231 | 2.91E-04 | 3491/61782 | 1.51E-03 |
| M_HDL_L         | -0.0427 | 0.0189 | -2.2608 | 2.38E-02 | 5498/51404 | 4.73E-02 | -0.0524 | 0.0225 | -2.3251 | 2.01E-02 | 3491/61782 | 4.67E-02 |
| M_HDL_PL        | -0.0302 | 0.0188 | -1.6069 | 1.08E-01 | 5498/51404 | 1.82E-01 | -0.0396 | 0.0224 | -1.7627 | 7.79E-02 | 3491/61782 | 1.48E-01 |
| M_HDL_C         | -0.0699 | 0.0175 | -3.9948 | 6.48E-05 | 5498/51404 | 2.52E-04 | -0.0887 | 0.0219 | -4.0440 | 5.25E-05 | 3491/61782 | 7.27E-04 |
| M_HDL_CE        | -0.0690 | 0.0171 | -4.0270 | 5.65E-05 | 5498/51404 | 2.31E-04 | -0.0895 | 0.0218 | -4.1010 | 4.11E-05 | 3491/61782 | 6.83E-04 |
| M_HDL_FC        | -0.0690 | 0.0185 | -3.7382 | 1.85E-04 | 5498/51404 | 6.69E-04 | -0.0831 | 0.0225 | -3.7021 | 2.14E-04 | 3491/61782 | 1.16E-03 |
| M_HDL_TG        | 0.0608  | 0.0167 | 3.6482  | 2.64E-04 | 5498/51404 | 9.13E-04 | 0.0549  | 0.0197 | 2.7807  | 5.42E-03 | 3491/61782 | 1.61E-02 |
| S_HDL_P         | 0.0102  | 0.0171 | 0.5954  | 5.52E-01 | 5498/51404 | 6.77E-01 | -0.0022 | 0.0203 | -0.1087 | 9.13E-01 | 3491/61782 | 9.32E-01 |
| S_HDL_L         | 0.0221  | 0.0173 | 1.2748  | 2.02E-01 | 5498/51404 | 3.02E-01 | 0.0102  | 0.0205 | 0.4980  | 6.18E-01 | 3491/61782 | 7.26E-01 |
| S_HDL_PL        | 0.0219  | 0.0174 | 1.2545  | 2.10E-01 | 5498/51404 | 3.09E-01 | 0.0101  | 0.0207 | 0.4867  | 6.26E-01 | 3491/61782 | 7.32E-01 |
| S_HDL_C         | 0.0025  | 0.0172 | 0.1475  | 8.83E-01 | 5498/51404 | 9.31E-01 | -0.0103 | 0.0205 | -0.5018 | 6.16E-01 | 3491/61782 | 7.26E-01 |
| S_HDL_CE        | 0.0049  | 0.0178 | 0.2774  | 7.82E-01 | 5498/51404 | 8.73E-01 | -0.0090 | 0.0211 | -0.4267 | 6.70E-01 | 3491/61782 | 7.51E-01 |
| S_HDL_FC        | -0.0043 | 0.0176 | -0.2422 | 8.09E-01 | 5498/51404 | 8.87E-01 | -0.0139 | 0.0208 | -0.6663 | 5.05E-01 | 3491/61782 | 6.25E-01 |
| S_HDL_TG        | 0.0845  | 0.0174 | 4.8548  | 1.21E-06 | 5498/51404 | 1.88E-05 | 0.0817  | 0.0207 | 3.9519  | 7.75E-05 | 3491/61782 | 8.96E-04 |
| XXL_VLDL_PL_pct | 0.0449  | 0.0161 | 2.7979  | 5.14E-03 | 5335/49767 | 1.24E-02 | 0.0532  | 0.0194 | 2.7382  | 6.18E-03 | 3391/59815 | 1.79E-02 |
| XXL_VLDL_C_pct  | -0.0183 | 0.0162 | -1.1312 | 2.58E-01 | 5335/49767 | 3.63E-01 | -0.0200 | 0.0191 | -1.0431 | 2.97E-01 | 3391/59815 | 4.18E-01 |
| XXL_VLDL_CE_pct | -0.0096 | 0.0162 | -0.5913 | 5.54E-01 | 5335/49767 | 6.77E-01 | -0.0148 | 0.0191 | -0.7771 | 4.37E-01 | 3391/59815 | 5.67E-01 |
| XXL_VLDL_FC_pct | -0.0146 | 0.0161 | -0.9013 | 3.67E-01 | 5335/49767 | 4.79E-01 | -0.0072 | 0.0192 | -0.3747 | 7.08E-01 | 3391/59815 | 7.80E-01 |
| XXL_VLDL_TG_pct | 0.0091  | 0.0164 | 0.5534  | 5.80E-01 | 5335/49767 | 6.94E-01 | 0.0089  | 0.0189 | 0.4713  | 6.37E-01 | 3391/59815 | 7.35E-01 |
| XL_VLDL_PL_pct  | 0.0343  | 0.0159 | 2.1580  | 3.09E-02 | 5447/50959 | 5.88E-02 | 0.0419  | 0.0196 | 2.1421  | 3.22E-02 | 3455/61253 | 6.79E-02 |
| XL_VLDL_C_pct   | -0.0840 | 0.0177 | -4.7497 | 2.04E-06 | 5447/50959 | 2.39E-05 | -0.0878 | 0.0209 | -4.1909 | 2.78E-05 | 3455/61253 | 5.32E-04 |
| XL_VLDL_CE_pct  | -0.0824 | 0.0178 | -4.6412 | 3.46E-06 | 5447/50959 | 2.89E-05 | -0.0884 | 0.0210 | -4.2056 | 2.60E-05 | 3455/61253 | 5.32E-04 |
| XL_VLDL_FC_pct  | -0.0576 | 0.0166 | -3.4811 | 4.99E-04 | 5447/50959 | 1.55E-03 | -0.0492 | 0.0195 | -2.5289 | 1.14E-02 | 3455/61253 | 3.00E-02 |
| XL_VLDL_TG_pct  | 0.0790  | 0.0206 | 3.8370  | 1.25E-04 | 5447/50959 | 4.76E-04 | 0.1054  | 0.0264 | 3.9942  | 6.49E-05 | 3455/61253 | 8.51E-04 |
| L_VLDL_PL_pct   | 0.0365  | 0.0156 | 2.3368  | 1.94E-02 | 5498/51397 | 3.94E-02 | 0.0216  | 0.0176 | 1.2244  | 2.21E-01 | 3491/61775 | 3.27E-01 |
| L_VLDL_C_pct    | -0.0297 | 0.0158 | -1.8817 | 5.99E-02 | 5498/51397 | 1.05E-01 | -0.0305 | 0.0186 | -1.6440 | 1.00E-01 | 3491/61775 | 1.79E-01 |

|                |         |        |         |          |            |          |         |        |         |          |            |          |
|----------------|---------|--------|---------|----------|------------|----------|---------|--------|---------|----------|------------|----------|
| L_VLDL_CE_pct  | -0.0510 | 0.0170 | -3.0037 | 2.67E-03 | 5498/51397 | 6.67E-03 | -0.0519 | 0.0200 | -2.5965 | 9.42E-03 | 3491/61775 | 2.55E-02 |
| L_VLDL_FC_pct  | 0.0205  | 0.0153 | 1.3457  | 1.78E-01 | 5498/51397 | 2.76E-01 | 0.0194  | 0.0181 | 1.0729  | 2.83E-01 | 3491/61775 | 4.07E-01 |
| L_VLDL_TG_pct  | -0.0029 | 0.0191 | -0.1498 | 8.81E-01 | 5498/51397 | 9.31E-01 | -0.0093 | 0.0231 | -0.4022 | 6.88E-01 | 3491/61775 | 7.62E-01 |
| M_VLDL_PL_pct  | -0.0347 | 0.0160 | -2.1733 | 2.98E-02 | 5498/51404 | 5.74E-02 | -0.0325 | 0.0173 | -1.8802 | 6.01E-02 | 3491/61782 | 1.19E-01 |
| M_VLDL_C_pct   | -0.0830 | 0.0189 | -4.3986 | 1.09E-05 | 5498/51404 | 6.03E-05 | -0.0782 | 0.0223 | -3.5054 | 4.56E-04 | 3491/61782 | 1.96E-03 |
| M_VLDL_CE_pct  | -0.0537 | 0.0175 | -3.0673 | 2.16E-03 | 5498/51404 | 5.64E-03 | -0.0497 | 0.0199 | -2.4992 | 1.24E-02 | 3491/61782 | 3.12E-02 |
| M_VLDL_FC_pct  | -0.0741 | 0.0183 | -4.0494 | 5.13E-05 | 5498/51404 | 2.17E-04 | -0.0692 | 0.0215 | -3.2105 | 1.33E-03 | 3491/61782 | 4.85E-03 |
| M_VLDL_TG_pct  | 0.1012  | 0.0192 | 5.2658  | 1.40E-07 | 5498/51404 | 6.95E-06 | 0.0982  | 0.0229 | 4.2813  | 1.86E-05 | 3491/61782 | 5.32E-04 |
| S_VLDL_PL_pct  | -0.0840 | 0.0182 | -4.6211 | 3.82E-06 | 5498/51404 | 2.94E-05 | -0.0875 | 0.0215 | -4.0639 | 4.83E-05 | 3491/61782 | 7.07E-04 |
| S_VLDL_C_pct   | -0.0632 | 0.0178 | -3.5460 | 3.91E-04 | 5498/51404 | 1.27E-03 | -0.0609 | 0.0211 | -2.8877 | 3.88E-03 | 3491/61782 | 1.25E-02 |
| S_VLDL_CE_pct  | -0.0378 | 0.0170 | -2.2244 | 2.61E-02 | 5498/51404 | 5.12E-02 | -0.0341 | 0.0200 | -1.7024 | 8.87E-02 | 3491/61782 | 1.64E-01 |
| S_VLDL_FC_pct  | -0.0842 | 0.0185 | -4.5480 | 5.42E-06 | 5498/51404 | 3.50E-05 | -0.0847 | 0.0219 | -3.8716 | 1.08E-04 | 3491/61782 | 9.61E-04 |
| S_VLDL_TG_pct  | 0.0806  | 0.0176 | 4.5759  | 4.74E-06 | 5498/51404 | 3.36E-05 | 0.0823  | 0.0210 | 3.9190  | 8.89E-05 | 3491/61782 | 9.44E-04 |
| XS_VLDL_PL_pct | 0.0607  | 0.0184 | 3.3038  | 9.54E-04 | 5498/51404 | 2.67E-03 | 0.0722  | 0.0218 | 3.3055  | 9.48E-04 | 3491/61782 | 3.58E-03 |
| XS_VLDL_C_pct  | -0.0884 | 0.0194 | -4.5557 | 5.22E-06 | 5498/51404 | 3.50E-05 | -0.0891 | 0.0229 | -3.8882 | 1.01E-04 | 3491/61782 | 9.61E-04 |
| XS_VLDL_CE_pct | -0.0880 | 0.0196 | -4.5008 | 6.77E-06 | 5498/51404 | 4.11E-05 | -0.0893 | 0.0230 | -3.8788 | 1.05E-04 | 3491/61782 | 9.61E-04 |
| XS_VLDL_FC_pct | -0.0584 | 0.0176 | -3.3091 | 9.36E-04 | 5498/51404 | 2.65E-03 | -0.0492 | 0.0210 | -2.3396 | 1.93E-02 | 3491/61782 | 4.53E-02 |
| XS_VLDL_TG_pct | 0.0939  | 0.0188 | 4.9899  | 6.04E-07 | 5498/51404 | 1.50E-05 | 0.0989  | 0.0224 | 4.4108  | 1.03E-05 | 3491/61782 | 4.98E-04 |
| IDL_PL_pct     | 0.0281  | 0.0166 | 1.6887  | 9.13E-02 | 5498/51404 | 1.56E-01 | 0.0451  | 0.0197 | 2.2882  | 2.21E-02 | 3491/61782 | 5.05E-02 |
| IDL_C_pct      | -0.0649 | 0.0183 | -3.5455 | 3.92E-04 | 5498/51404 | 1.27E-03 | -0.0752 | 0.0215 | -3.4959 | 4.72E-04 | 3491/61782 | 1.99E-03 |
| IDL_CE_pct     | -0.0453 | 0.0181 | -2.4991 | 1.25E-02 | 5498/51404 | 2.74E-02 | -0.0674 | 0.0213 | -3.1695 | 1.53E-03 | 3491/61782 | 5.28E-03 |
| IDL_FC_pct     | -0.0656 | 0.0171 | -3.8338 | 1.26E-04 | 5498/51404 | 4.76E-04 | -0.0443 | 0.0203 | -2.1850 | 2.89E-02 | 3491/61782 | 6.20E-02 |
| IDL_TG_pct     | 0.0833  | 0.0185 | 4.5059  | 6.61E-06 | 5498/51404 | 4.11E-05 | 0.0925  | 0.0219 | 4.2246  | 2.39E-05 | 3491/61782 | 5.32E-04 |
| L_LDL_PL_pct   | -0.0102 | 0.0166 | -0.6161 | 5.38E-01 | 5498/51404 | 6.66E-01 | -0.0069 | 0.0195 | -0.3571 | 7.21E-01 | 3491/61782 | 7.87E-01 |
| L_LDL_C_pct    | -0.0079 | 0.0106 | -0.7427 | 4.58E-01 | 5498/51404 | 5.84E-01 | -0.0113 | 0.0106 | -1.0682 | 2.85E-01 | 3491/61782 | 4.07E-01 |
| L_LDL_CE_pct   | -0.0042 | 0.0120 | -0.3528 | 7.24E-01 | 5498/51404 | 8.37E-01 | -0.0098 | 0.0120 | -0.8157 | 4.15E-01 | 3491/61782 | 5.41E-01 |
| L_LDL_FC_pct   | -0.0171 | 0.0128 | -1.3316 | 1.83E-01 | 5498/51404 | 2.80E-01 | -0.0155 | 0.0108 | -1.4387 | 1.50E-01 | 3491/61782 | 2.40E-01 |
| L_LDL_TG_pct   | 0.0601  | 0.0181 | 3.3196  | 9.01E-04 | 5498/51404 | 2.58E-03 | 0.0702  | 0.0214 | 3.2872  | 1.01E-03 | 3491/61782 | 3.76E-03 |
| M_LDL_PL_pct   | -0.0012 | 0.0105 | -0.1168 | 9.07E-01 | 5498/51404 | 9.45E-01 | -0.0043 | 0.0108 | -0.4003 | 6.89E-01 | 3491/61782 | 7.62E-01 |
| M_LDL_C_pct    | -0.0056 | 0.0094 | -0.5937 | 5.53E-01 | 5498/51404 | 6.77E-01 | -0.0088 | 0.0094 | -0.9379 | 3.48E-01 | 3491/61782 | 4.66E-01 |
| M_LDL_CE_pct   | -0.0013 | 0.0096 | -0.1342 | 8.93E-01 | 5498/51404 | 9.38E-01 | -0.0056 | 0.0095 | -0.5938 | 5.53E-01 | 3491/61782 | 6.65E-01 |
| M_LDL_FC_pct   | -0.0235 | 0.0152 | -1.5432 | 1.23E-01 | 5498/51404 | 2.01E-01 | -0.0230 | 0.0136 | -1.6944 | 9.02E-02 | 3491/61782 | 1.65E-01 |
| M_LDL_TG_pct   | 0.0480  | 0.0176 | 2.7305  | 6.32E-03 | 5498/51404 | 1.49E-02 | 0.0582  | 0.0207 | 2.8065  | 5.01E-03 | 3491/61782 | 1.52E-02 |
| S_LDL_PL_pct   | -0.0423 | 0.0167 | -2.5397 | 1.11E-02 | 5498/51404 | 2.47E-02 | -0.0290 | 0.0197 | -1.4678 | 1.42E-01 | 3491/61782 | 2.33E-01 |
| S_LDL_C_pct    | -0.0046 | 0.0094 | -0.4898 | 6.24E-01 | 5498/51404 | 7.40E-01 | -0.0085 | 0.0093 | -0.9132 | 3.61E-01 | 3491/61782 | 4.77E-01 |
| S_LDL_CE_pct   | 0.0003  | 0.0104 | 0.0287  | 9.77E-01 | 5498/51404 | 9.85E-01 | -0.0053 | 0.0099 | -0.5411 | 5.88E-01 | 3491/61782 | 6.98E-01 |
| S_LDL_FC_pct   | -0.0186 | 0.0132 | -1.4171 | 1.56E-01 | 5498/51404 | 2.50E-01 | -0.0197 | 0.0128 | -1.5456 | 1.22E-01 | 3491/61782 | 2.10E-01 |
| S_LDL_TG_pct   | 0.0746  | 0.0177 | 4.2273  | 2.37E-05 | 5498/51404 | 1.07E-04 | 0.0793  | 0.0209 | 3.8008  | 1.44E-04 | 3491/61782 | 1.09E-03 |
| XL_HDL_PL_pct  | -0.0074 | 0.0154 | -0.4787 | 6.32E-01 | 5497/51392 | 7.46E-01 | 0.0068  | 0.0205 | 0.3298  | 7.42E-01 | 3491/61768 | 8.06E-01 |
| XL_HDL_C_pct   | -0.0030 | 0.0176 | -0.1711 | 8.64E-01 | 5497/51392 | 9.27E-01 | 0.0090  | 0.0212 | 0.4271  | 6.69E-01 | 3491/61768 | 7.51E-01 |
| XL_HDL_CE_pct  | -0.0208 | 0.0136 | -1.5357 | 1.25E-01 | 5497/51392 | 2.03E-01 | -0.0175 | 0.0164 | -1.0634 | 2.88E-01 | 3491/61768 | 4.07E-01 |
| XL_HDL_FC_pct  | 0.0612  | 0.0195 | 3.1304  | 1.75E-03 | 5497/51392 | 4.62E-03 | 0.0580  | 0.0232 | 2.4965  | 1.25E-02 | 3491/61768 | 3.12E-02 |
| XL_HDL_TG_pct  | 0.0893  | 0.0182 | 4.9092  | 9.14E-07 | 5497/51392 | 1.73E-05 | 0.0803  | 0.0216 | 3.7139  | 2.04E-04 | 3491/61768 | 1.16E-03 |
| L_HDL_PL_pct   | 0.1335  | 0.0307 | 4.3539  | 1.34E-05 | 5498/51404 | 6.66E-05 | 0.1021  | 0.0367 | 2.7815  | 5.41E-03 | 3491/61782 | 1.61E-02 |
| L_HDL_C_pct    | -0.0400 | 0.0145 | -2.7656 | 5.68E-03 | 5498/51404 | 1.35E-02 | -0.0388 | 0.0185 | -2.0973 | 3.60E-02 | 3491/61782 | 7.53E-02 |
| L_HDL_CE_pct   | -0.0395 | 0.0154 | -2.5676 | 1.02E-02 | 5498/51404 | 2.30E-02 | -0.0388 | 0.0193 | -2.0101 | 4.44E-02 | 3491/61782 | 8.92E-02 |
| L_HDL_FC_pct   | -0.0342 | 0.0151 | -2.2722 | 2.31E-02 | 5498/51404 | 4.63E-02 | -0.0277 | 0.0198 | -1.3949 | 1.63E-01 | 3491/61782 | 2.59E-01 |
| L_HDL_TG_pct   | 0.0825  | 0.0180 | 4.5805  | 4.64E-06 | 5498/51404 | 3.36E-05 | 0.0764  | 0.0215 | 3.5573  | 3.75E-04 | 3491/61782 | 1.72E-03 |
| M_HDL_PL_pct   | 0.1405  | 0.0236 | 5.9506  | 2.67E-09 | 5498/51404 | 6.65E-07 | 0.1469  | 0.0281 | 5.2335  | 1.66E-07 | 3491/61782 | 4.14E-05 |

|              |         |        |         |          |            |          |         |        |         |          |            |          |
|--------------|---------|--------|---------|----------|------------|----------|---------|--------|---------|----------|------------|----------|
| M_HDL_C_pct  | -0.0603 | 0.0161 | -3.7342 | 1.88E-04 | 5498/51404 | 6.70E-04 | -0.1259 | 0.0278 | -4.5228 | 6.10E-06 | 3491/61782 | 3.80E-04 |
| M_HDL_CE_pct | -0.0543 | 0.0148 | -3.6665 | 2.46E-04 | 5498/51404 | 8.62E-04 | -0.1080 | 0.0257 | -4.2011 | 2.66E-05 | 3491/61782 | 5.32E-04 |
| M_HDL_FC_pct | -0.0744 | 0.0170 | -4.3631 | 1.28E-05 | 5498/51404 | 6.52E-05 | -0.1168 | 0.0257 | -4.5470 | 5.44E-06 | 3491/61782 | 3.80E-04 |
| M_HDL_TG_pct | 0.0887  | 0.0176 | 5.0514  | 4.39E-07 | 5498/51404 | 1.37E-05 | 0.0878  | 0.0209 | 4.1940  | 2.74E-05 | 3491/61782 | 5.32E-04 |
| S_HDL_PL_pct | 0.0005  | 0.0172 | 0.0295  | 9.76E-01 | 5498/51404 | 9.85E-01 | -0.0002 | 0.0205 | -0.0117 | 9.91E-01 | 3491/61782 | 9.91E-01 |
| S_HDL_C_pct  | -0.0520 | 0.0170 | -3.0651 | 2.18E-03 | 5498/51404 | 5.64E-03 | -0.0552 | 0.0201 | -2.7512 | 5.94E-03 | 3491/61782 | 1.74E-02 |
| S_HDL_CE_pct | -0.0365 | 0.0191 | -1.9057 | 5.67E-02 | 5498/51404 | 1.02E-01 | -0.0422 | 0.0225 | -1.8745 | 6.09E-02 | 3491/61782 | 1.19E-01 |
| S_HDL_FC_pct | -0.0730 | 0.0181 | -4.0303 | 5.57E-05 | 5498/51404 | 2.31E-04 | -0.0672 | 0.0215 | -3.1201 | 1.81E-03 | 3491/61782 | 6.17E-03 |
| S_HDL_TG_pct | 0.0900  | 0.0178 | 5.0629  | 4.13E-07 | 5498/51404 | 1.37E-05 | 0.0928  | 0.0212 | 4.3776  | 1.20E-05 | 3491/61782 | 4.98E-04 |

**eTable 3. Significant Findings and replication in BBMRI-NL Study**

| metabolite     | UK Biobank |          |             |               | BBMRI-NL |        |        |          |          |
|----------------|------------|----------|-------------|---------------|----------|--------|--------|----------|----------|
|                | Z_MDD      | FDR_MDD  | Z_RECURRENT | FDR_RECURRENT | Effect   | SE     | Z      | pval     | FDR      |
| M_HDL_PL_pct   | 5.8070     | 1.58E-06 | 4.7630      | 4.75E-04      | 0.0411   | 0.0365 | 1.1277 | 1.30E-01 | 2.18E-01 |
| M_VLDL_TG_pct  | 5.5348     | 3.88E-06 | 3.9598      | 1.44E-03      | 0.0449   | 0.0241 | 1.8609 | 3.14E-02 | 6.28E-02 |
| MUFA_pct       | 5.3906     | 5.48E-06 | 3.9769      | 1.44E-03      | 0.0876   | 0.0438 | 1.9989 | 2.28E-02 | 4.68E-02 |
| TG_by_PG       | 5.3420     | 5.48E-06 | 4.3874      | 1.02E-03      | 0.1409   | 0.0228 | 6.1839 | 3.13E-10 | 8.99E-09 |
| XL_HDL_C       | -5.3094    | 5.48E-06 | -3.4107     | 3.84E-03      | -0.0689  | 0.0252 | -      | 3.15E-03 | 7.42E-03 |
| XL_HDL_P       | -5.0560    | 1.78E-05 | -3.3852     | 4.05E-03      | -0.0933  | 0.0218 | -      | 9.43E-06 | 4.09E-05 |
| VLDL_size      | 4.9015     | 2.37E-05 | 3.8887      | 1.67E-03      | 0.1195   | 0.0254 | 4.6995 | 1.30E-06 | 8.82E-06 |
| M_HDL_TG_pct   | 4.9109     | 2.37E-05 | 3.9611      | 1.44E-03      | 0.1273   | 0.0269 | 4.7362 | 1.09E-06 | 7.83E-06 |
| S_HDL_TG_pct   | 4.9156     | 2.37E-05 | 4.0802      | 1.40E-03      | 0.1600   | 0.0204 | 7.8590 | 1.94E-15 | 4.45E-13 |
| XS_VLDL_TG_pct | 4.9455     | 2.37E-05 | 3.9743      | 1.44E-03      | 0.0827   | 0.0272 | 3.0451 | 1.16E-03 | 3.04E-03 |
| XL_HDL_FC      | -4.8481    | 2.39E-05 | -3.1873     | 6.27E-03      | -0.0924  | 0.0214 | -      | 8.25E-06 | 3.71E-05 |
| XL_HDL_L       | -4.8587    | 2.39E-05 | -3.2191     | 5.93E-03      | -0.1005  | 0.0218 | -      | 2.05E-06 | 1.24E-05 |
| XL_VLDL_TG     | 4.8497     | 2.39E-05 | 3.9727      | 1.44E-03      | 0.1134   | 0.0295 | 3.8436 | 6.06E-05 | 2.05E-04 |
| HDL_size       | -4.7770    | 2.95E-05 | -3.5915     | 2.69E-03      | -0.0958  | 0.0272 | -      | 2.10E-04 | 6.10E-04 |
| XL_HDL_TG_pct  | 4.7843     | 2.95E-05 | 3.4595      | 3.37E-03      | 0.1273   | 0.0208 | 6.1084 | 5.03E-10 | 1.24E-08 |
| S_HDL_TG       | 4.7421     | 3.10E-05 | 3.8453      | 1.67E-03      | 0.1231   | 0.0252 | 4.8740 | 5.47E-07 | 4.34E-06 |
| XL_VLDL_C_pct  | -4.7431    | 3.10E-05 | -4.2180     | 1.07E-03      | 0.0236   | 0.0718 | 0.3292 | 3.71E-01 | 4.99E-01 |
| PUFA_by_MUFA   | -4.7178    | 3.30E-05 | -3.4471     | 3.44E-03      | NA       | NA     | NA     | NA       | NA       |
| XL_HDL_CE      | -4.6846    | 3.68E-05 | -3.0651     | 8.34E-03      | -0.0598  | 0.0275 | -      | 1.47E-02 | 3.10E-02 |
| L_HDL_C        | -4.6641    | 3.86E-05 | -3.3331     | 4.44E-03      | -0.1253  | 0.0235 | -      | 4.87E-08 | 5.90E-07 |
| L_HDL_CE       | -4.6069    | 4.07E-05 | -3.3287     | 4.44E-03      | -0.1128  | 0.0266 | -      | 1.09E-05 | 4.55E-05 |
| L_HDL_L        | -4.6145    | 4.07E-05 | -3.3516     | 4.35E-03      | -0.1256  | 0.0241 | -      | 9.56E-08 | 1.05E-06 |
| L_HDL_P        | -4.6199    | 4.07E-05 | -3.1530     | 6.94E-03      | -0.1252  | 0.0234 | -      | 4.64E-08 | 5.90E-07 |
| L_VLDL_TG      | 4.5989     | 4.07E-05 | 3.7258      | 2.02E-03      | 0.1226   | 0.0253 | 4.8558 | 5.99E-07 | 4.60E-06 |
| XL_VLDL_P      | 4.5996     | 4.07E-05 | 3.7629      | 1.99E-03      | 0.1078   | 0.0325 | 3.3142 | 4.59E-04 | 1.29E-03 |
| XL_VLDL_CE_pct | -4.6290    | 4.07E-05 | -4.1725     | 1.07E-03      | 0.0298   | 0.0273 | 1.0909 | 1.38E-01 | 2.26E-01 |
| S_VLDL_PL_pct  | -4.5585    | 4.51E-05 | -3.5595     | 2.72E-03      | -0.1144  | 0.0205 | -      | 1.29E-08 | 2.08E-07 |
| S_VLDL_TG_pct  | 4.5551     | 4.51E-05 | 3.6146      | 2.67E-03      | 0.1041   | 0.0211 | 4.9444 | 3.82E-07 | 3.25E-06 |
| VLDL_TG        | 4.5475     | 4.51E-05 | 3.8116      | 1.72E-03      | 0.1086   | 0.0289 | 3.7548 | 8.68E-05 | 2.77E-04 |
| XL_VLDL_L      | 4.5472     | 4.51E-05 | 3.7304      | 2.02E-03      | 0.1214   | 0.0268 | 4.5383 | 2.83E-06 | 1.52E-05 |
| L_VLDL_P       | 4.5151     | 5.08E-05 | 3.7254      | 2.02E-03      | 0.1167   | 0.0282 | 4.1409 | 1.73E-05 | 6.86E-05 |
| HDL_CE         | -4.4766    | 5.40E-05 | -3.5867     | 2.69E-03      | NA       | NA     | NA     | NA       | NA       |
| S_VLDL_TG      | 4.4861     | 5.40E-05 | 3.8150      | 1.72E-03      | 0.1141   | 0.0274 | 4.1601 | 1.59E-05 | 6.42E-05 |
| S_VLDL_FC_pct  | -4.4791    | 5.40E-05 | -3.3286     | 4.44E-03      | -0.1384  | 0.0211 | -      | 2.51E-11 | 9.62E-10 |
| XS_VLDL_C_pct  | -4.4803    | 5.40E-05 | -3.3134     | 4.59E-03      | -0.0422  | 0.0651 | -      | 2.59E-01 | 3.81E-01 |
| HDL_C          | -4.4624    | 5.48E-05 | -3.5233     | 2.87E-03      | -0.1523  | 0.0217 | -      | 1.24E-12 | 9.47E-11 |
| L_HDL_FC       | -4.4613    | 5.48E-05 | -3.0502     | 8.63E-03      | -0.1307  | 0.0224 | -      | 2.52E-09 | 4.76E-08 |
| L_HDL_TG_pct   | 4.4500     | 5.63E-05 | 3.2902      | 4.79E-03      | 0.0936   | 0.0247 | 3.7931 | 7.44E-05 | 2.48E-04 |
| IDL_TG_pct     | 4.4407     | 5.69E-05 | 3.5606      | 2.72E-03      | 0.0854   | 0.0356 | 2.4033 | 8.12E-03 | 1.81E-02 |
| L_VLDL_L       | 4.4366     | 5.69E-05 | 3.6490      | 2.52E-03      | 0.1251   | 0.0246 | 5.0808 | 1.88E-07 | 1.80E-06 |
| XS_VLDL_CE_pct | -4.4158    | 6.11E-05 | -3.2712     | 5.03E-03      | -0.0391  | 0.0562 | -      | 2.43E-01 | 3.61E-01 |

|                |         |          |         |          |         |        |        |          |          |
|----------------|---------|----------|---------|----------|---------|--------|--------|----------|----------|
| M_HDL_FC_pct   | -4.3532 | 7.95E-05 | -4.3714 | 1.02E-03 | -0.0713 | 0.0436 | -      | 5.09E-02 | 9.84E-02 |
| XXL_VLDL_FC    | 4.3358  | 8.22E-05 | 3.9354  | 1.48E-03 | 0.1087  | 0.0333 | 3.2666 | 5.44E-04 | 1.49E-03 |
| M_VLDL_C_pct   | -4.3406 | 8.22E-05 | -3.0113 | 9.67E-03 | -0.0398 | 0.0369 | -      | 1.40E-01 | 2.29E-01 |
| XXL_VLDL_P     | 4.3297  | 8.26E-05 | 3.8712  | 1.67E-03 | 0.1089  | 0.0313 | 3.4740 | 2.56E-04 | 7.28E-04 |
| L_VLDL_FC      | 4.3035  | 9.10E-05 | 3.5459  | 2.78E-03 | 0.1110  | 0.0301 | 3.6891 | 1.13E-04 | 3.50E-04 |
| L_HDL_PL_pct   | 4.2874  | 9.58E-05 | 2.4316  | 4.02E-02 | 0.0552  | 0.0361 | 1.5306 | 6.29E-02 | 1.19E-01 |
| L_HDL_PL       | -4.2753 | 9.81E-05 | -3.1930 | 6.26E-03 | -0.1260 | 0.0243 | -      | 1.05E-07 | 1.10E-06 |
| Total_TG       | 4.2728  | 9.81E-05 | 3.5941  | 2.69E-03 | 0.1082  | 0.0271 | 3.9913 | 3.29E-05 | 1.15E-04 |
| M_VLDL_TG      | 4.2416  | 1.11E-04 | 3.5243  | 2.87E-03 | 0.1346  | 0.0226 | 5.9462 | 1.37E-09 | 2.87E-08 |
| XXL_VLDL_C     | 4.2348  | 1.12E-04 | 3.6937  | 2.20E-03 | 0.1121  | 0.0273 | 4.1030 | 2.04E-05 | 7.95E-05 |
| HDL_FC         | -4.2133 | 1.21E-04 | -3.1932 | 6.26E-03 | NA      | NA     | NA     | NA       | NA       |
| S_LDL_TG_pct   | 4.1736  | 1.41E-04 | 3.3719  | 4.13E-03 | 0.0926  | 0.0308 | 3.0114 | 1.30E-03 | 3.36E-03 |
| XXL_VLDL_CE    | 4.1573  | 1.49E-04 | 3.5021  | 3.00E-03 | 0.1103  | 0.0295 | 3.7414 | 9.15E-05 | 2.88E-04 |
| XL_VLDL_FC     | 4.1027  | 1.85E-04 | 3.3834  | 4.05E-03 | 0.1249  | 0.0263 | 4.7509 | 1.01E-06 | 7.51E-06 |
| XXL_VLDL_PL    | 4.0786  | 2.01E-04 | 3.8535  | 1.67E-03 | 0.1112  | 0.0306 | 3.6376 | 1.38E-04 | 4.16E-04 |
| M_VLDL_FC_pct  | -4.0342 | 2.35E-04 | -2.8138 | 1.72E-02 | 0.0423  | 0.0318 | 1.3274 | 9.22E-02 | 1.63E-01 |
| S_HDL_FC_pct   | -4.0341 | 2.35E-04 | -2.7479 | 2.01E-02 | -0.0518 | 0.0409 | -      | 1.03E-01 | 1.76E-01 |
| XXL_VLDL_L     | 4.0213  | 2.44E-04 | 3.6268  | 2.65E-03 | 0.1226  | 0.0279 | 4.3861 | 5.77E-06 | 2.79E-05 |
| XL_VLDL_PL     | 3.9766  | 2.90E-04 | 3.0973  | 7.84E-03 | 0.1154  | 0.0292 | 3.9492 | 3.92E-05 | 1.35E-04 |
| XL_VLDL_TG_pct | 3.9728  | 2.90E-04 | 3.3047  | 4.64E-03 | 0.0064  | 0.0057 | 1.1258 | 8.70E-01 | 9.08E-01 |
| Citrate        | -3.8896 | 4.03E-04 | -3.1055 | 7.75E-03 | -0.0291 | 2.6604 | -      | 5.04E-01 | 6.44E-01 |
| M_HDL_CE       | -3.8594 | 4.49E-04 | -3.5656 | 2.72E-03 | -0.1121 | 0.0211 | -      | 5.22E-08 | 6.00E-07 |
| L_VLDL_C       | 3.8522  | 4.55E-04 | 3.1432  | 7.05E-03 | 0.1261  | 0.0255 | 4.9338 | 4.03E-07 | 3.31E-06 |
| M_HDL_C        | -3.8326 | 4.86E-04 | -3.4975 | 3.00E-03 | -0.1173 | 0.0211 | -      | 1.36E-08 | 2.08E-07 |
| IDL_FC_pct     | -3.7787 | 5.95E-04 | -2.0621 | 8.95E-02 | -0.1017 | 0.0349 | -      | 1.76E-03 | 4.45E-03 |
| M_HDL_C_pct    | -3.7219 | 7.35E-04 | -4.2357 | 1.07E-03 | -0.1195 | 0.0258 | -      | 1.83E-06 | 1.14E-05 |
| L_VLDL_PL      | 3.6896  | 8.22E-04 | 2.5176  | 3.27E-02 | 0.1226  | 0.0270 | 4.5357 | 2.87E-06 | 1.52E-05 |
| XL_VLDL_C      | 3.6622  | 9.03E-04 | 2.8831  | 1.42E-02 | 0.1437  | 0.0205 | 7.0112 | 1.18E-12 | 9.47E-11 |
| M_HDL_CE_pct   | -3.6326 | 9.98E-04 | -4.1917 | 1.07E-03 | -0.0964 | 0.0272 | -      | 2.01E-04 | 5.92E-04 |
| M_HDL_FC       | -3.6101 | 1.07E-03 | -3.1385 | 7.05E-03 | -0.1045 | 0.0225 | -      | 1.74E-06 | 1.11E-05 |
| M_HDL_TG       | 3.5756  | 1.21E-03 | 2.7780  | 1.89E-02 | 0.0583  | 0.0462 | 1.2608 | 1.04E-01 | 1.77E-01 |
| S_VLDL_C_pct   | -3.5214 | 1.46E-03 | -2.5651 | 2.92E-02 | -0.0562 | 0.0250 | -      | 1.22E-02 | 2.66E-02 |
| XL_VLDL_FC_pct | -3.4972 | 1.58E-03 | -2.6617 | 2.33E-02 | 0.0284  | 0.0604 | 0.4698 | 3.19E-01 | 4.48E-01 |
| IDL_C_pct      | -3.4662 | 1.75E-03 | -2.7452 | 2.01E-02 | -0.0526 | 0.0492 | -      | 1.43E-01 | 2.31E-01 |
| VLDL_L         | 3.4629  | 1.75E-03 | 2.9928  | 1.01E-02 | NA      | NA     | NA     | NA       | NA       |
| HDL_L          | -3.4353 | 1.91E-03 | -2.7125 | 2.16E-02 | NA      | NA     | NA     | NA       | NA       |
| PUFA_pct       | -3.4085 | 2.08E-03 | -2.4545 | 3.86E-02 | -0.0763 | 0.0397 | -      | 2.74E-02 | 5.57E-02 |
| L_VLDL_CE      | 3.3965  | 2.15E-03 | 2.7484  | 2.01E-02 | 0.1392  | 0.0208 | 6.6906 | 1.11E-11 | 5.11E-10 |
| XS_VLDL_TG     | 3.3917  | 2.16E-03 | 3.0789  | 8.08E-03 | 0.1005  | 0.0251 | 4.0061 | 3.09E-05 | 1.11E-04 |
| M_HDL_P        | -3.3483 | 2.50E-03 | -3.0790 | 8.08E-03 | -0.0850 | 0.0225 | -      | 7.77E-05 | 2.55E-04 |
| Sphingomyelins | -3.3342 | 2.60E-03 | -2.6687 | 2.33E-02 | -0.0369 | 0.0271 | -      | 8.68E-02 | 1.56E-01 |
| XS_VLDL_FC_pct | -3.2983 | 2.92E-03 | -2.1318 | 7.76E-02 | -0.1013 | 0.0367 | -      | 2.89E-03 | 6.93E-03 |
| L_LDL_TG_pct   | 3.2774  | 3.11E-03 | 2.6638  | 2.33E-02 | 0.0651  | 0.0384 | 1.6941 | 4.51E-02 | 8.87E-02 |
| Omega_6_pct    | -3.2696 | 3.15E-03 | -2.5373 | 3.13E-02 | -0.0752 | 0.0469 | -      | 5.45E-02 | 1.04E-01 |
| Unsaturation   | -3.2611 | 3.16E-03 | -2.1188 | 7.87E-02 | -0.0172 | 0.0255 | -      | 7.51E-01 | 8.26E-01 |
| HDL_TG         | 3.2633  | 3.16E-03 | 2.5847  | 2.80E-02 | 0.0836  | 0.0339 | 2.4652 | 6.85E-03 | 1.54E-02 |

|                 |         |          |         |          |         |        |        |          |          |
|-----------------|---------|----------|---------|----------|---------|--------|--------|----------|----------|
| XS_VLDL_PL_pct  | 3.2590  | 3.16E-03 | 2.6814  | 2.31E-02 | -0.1367 | 0.0214 | -      | 8.34E-11 | 2.74E-09 |
| XL_VLDL_CE      | 3.2499  | 3.23E-03 | 2.4510  | 3.86E-02 | 0.1407  | 0.0205 | 6.8559 | 3.54E-12 | 2.04E-10 |
| S_LDL_TG        | 3.2389  | 3.32E-03 | 2.8762  | 1.43E-02 | 0.0667  | 0.0212 | 3.1508 | 8.14E-04 | 2.18E-03 |
| XL_HDL_PL       | -3.1049 | 5.21E-03 | -1.5936 | 2.06E-01 | -0.1122 | 0.0218 | -      | 1.27E-07 | 1.27E-06 |
| L_VLDL_CE_pct   | -3.0529 | 6.13E-03 | -2.6298 | 2.53E-02 | 0.0009  | 0.0004 | 1.9306 | 9.73E-01 | 9.76E-01 |
| MUFA            | 3.0200  | 6.77E-03 | 2.4146  | 4.13E-02 | 0.0886  | 0.0204 | 4.3397 | 7.13E-06 | 3.35E-05 |
| IDL_FC          | -3.0020 | 7.00E-03 | -1.8112 | 1.48E-01 | -0.0383 | 0.0258 | -      | 6.89E-02 | 1.26E-01 |
| VLDL_PL         | 2.9980  | 7.00E-03 | 2.6647  | 2.33E-02 | NA      | NA     | NA     | NA       | NA       |
| S_VLDL_P        | 2.9970  | 7.00E-03 | 2.6887  | 2.29E-02 | 0.1202  | 0.0221 | 5.4382 | 2.69E-08 | 3.87E-07 |
| XL_HDL_FC_pct   | 3.0057  | 7.00E-03 | 2.1918  | 6.86E-02 | -0.0230 | 0.9432 | -      | 5.10E-01 | 6.48E-01 |
| S_HDL_C_pct     | -2.9784 | 7.36E-03 | -2.4175 | 4.13E-02 | -0.0644 | 0.0506 | -      | 1.01E-01 | 1.75E-01 |
| M_VLDL_CE_pct   | -2.8792 | 1.00E-02 | -1.9792 | 1.07E-01 | -0.0184 | 0.0540 | -      | 3.67E-01 | 4.99E-01 |
| ApoA1           | -2.8719 | 1.02E-02 | -2.3243 | 5.16E-02 | -0.1102 | 0.0220 | -      | 2.71E-07 | 2.50E-06 |
| S_VLDL_L        | 2.8653  | 1.03E-02 | 2.5831  | 2.80E-02 | 0.1118  | 0.0244 | 4.5844 | 2.28E-06 | 1.28E-05 |
| HDL_PL          | -2.8594 | 1.04E-02 | -2.2885 | 5.56E-02 | NA      | NA     | NA     | NA       | NA       |
| XXL_VLDL_PL_pct | 2.7822  | 1.31E-02 | 2.7237  | 2.12E-02 | -0.0095 | 0.0134 | -      | 7.62E-01 | 8.31E-01 |
| Pyruvate        | 2.7337  | 1.50E-02 | 1.8743  | 1.32E-01 | NA      | NA     | NA     | NA       | NA       |
| M_LDL_TG_pct    | 2.7222  | 1.54E-02 | 2.2444  | 6.12E-02 | 0.0600  | 0.0364 | 1.6456 | 4.99E-02 | 9.73E-02 |
| Ala             | 2.7183  | 1.54E-02 | 1.7793  | 1.56E-01 | 0.0237  | 0.0307 | 0.7722 | 2.20E-01 | 3.35E-01 |
| L_HDL_C_pct     | -2.6887 | 1.67E-02 | -1.8108 | 1.48E-01 | -0.1034 | 0.0225 | -      | 2.12E-06 | 1.25E-05 |
| IDL_C           | -2.6507 | 1.85E-02 | -1.7656 | 1.58E-01 | -0.0100 | 0.0297 | -      | 6.32E-01 | 7.42E-01 |
| M_VLDL_L        | 2.5077  | 2.78E-02 | 2.2671  | 5.82E-02 | 0.1165  | 0.0257 | 4.5333 | 2.90E-06 | 1.52E-05 |
| IDL_CE          | -2.5023 | 2.79E-02 | -1.7277 | 1.65E-01 | 0.0073  | 0.0123 | 0.5969 | 7.25E-01 | 8.05E-01 |
| VLDL_FC         | 2.4925  | 2.85E-02 | 2.3186  | 5.19E-02 | NA      | NA     | NA     | NA       | NA       |
| L_HDL_CE_pct    | -2.4605 | 3.08E-02 | -1.7345 | 1.64E-01 | -0.0920 | 0.0229 | -      | 3.00E-05 | 1.10E-04 |
| S_LDL_PL_pct    | -2.4475 | 3.17E-02 | -1.5020 | 2.37E-01 | 0.0208  | 0.0423 | 0.4914 | 3.12E-01 | 4.42E-01 |
| IDL_CE_pct      | -2.4284 | 3.31E-02 | -2.3249 | 5.16E-02 | 0.0027  | 0.0017 | 1.5633 | 9.41E-01 | 9.55E-01 |
| Total_CE        | -2.4087 | 3.47E-02 | -1.5525 | 2.21E-01 | -0.0358 | 0.0269 | -      | 9.18E-02 | 1.63E-01 |
| M_LDL_TG        | 2.3899  | 3.62E-02 | 2.2282  | 6.31E-02 | 0.0303  | 0.0273 | 1.1079 | 1.34E-01 | 2.22E-01 |
| XXL_VLDL_TG     | 2.3478  | 4.02E-02 | 2.6259  | 2.53E-02 | 0.1021  | 0.0347 | 2.9405 | 1.64E-03 | 4.19E-03 |
| HDL_P           | -2.3435 | 4.03E-02 | -1.9361 | 1.16E-01 | NA      | NA     | NA     | NA       | NA       |
| IDL_TG          | 2.2940  | 4.56E-02 | 2.1735  | 7.12E-02 | 0.0681  | 0.0208 | 3.2693 | 5.39E-04 | 1.49E-03 |
| L_HDL_FC_pct    | -2.2861 | 4.62E-02 | -1.1390 | 3.99E-01 | -0.0836 | 0.0316 | -      | 4.11E-03 | 9.45E-03 |
| LA_pct          | -2.2577 | 4.89E-02 | -1.5382 | 2.24E-01 | -0.0247 | 0.1030 | -      | 5.95E-01 | 7.16E-01 |
| IDL_L           | -2.2545 | 4.89E-02 | -1.4153 | 2.70E-01 | -0.0015 | 0.0009 | -      | 9.44E-01 | 9.55E-01 |
| L_VLDL_PL_pct   | 2.2547  | 4.89E-02 | 1.1187  | 4.05E-01 | 0.0041  | 0.0040 | 1.0085 | 8.43E-01 | 8.90E-01 |
| Total_P         | -2.2516 | 4.89E-02 | -1.7578 | 1.59E-01 | NA      | NA     | NA     | NA       | NA       |

**eTable 4. Novel Findings of the study**

| metabolite      | UK Biobank |          |             |               | BBMRI-NL |        |         |          |          |
|-----------------|------------|----------|-------------|---------------|----------|--------|---------|----------|----------|
|                 | Z_MDD      | FDR_MDD  | Z_RECURRENT | FDR_RECURRENT | Effect   | SE     | Z       | Pvalue   | FDR      |
| M_HDL_PL_pct    | 5.8070     | 1.58E-06 | 4.7630      | 4.75E-04      | 0.0411   | 0.0365 | 1.1277  | 1.30E-01 | 2.18E-01 |
| M_VLDL_TG_pct   | 5.5348     | 3.88E-06 | 3.9598      | 1.44E-03      | 0.0449   | 0.0241 | 1.8609  | 3.14E-02 | 6.28E-02 |
| XL_VLDL_C_pct   | -4.7431    | 3.10E-05 | -4.2180     | 1.07E-03      | 0.0236   | 0.0718 | 0.3292  | 3.71E-01 | 4.99E-01 |
| PUFA_by_MUFA    | -4.7178    | 3.30E-05 | -3.4471     | 3.44E-03      | NA       | NA     | NA      | NA       | NA       |
| XL_VLDL_CE_pct  | -4.6290    | 4.07E-05 | -4.1725     | 1.07E-03      | 0.0298   | 0.0273 | 1.0909  | 1.38E-01 | 2.26E-01 |
| HDL_CE          | -4.4766    | 5.40E-05 | -3.5867     | 2.69E-03      | NA       | NA     | NA      | NA       | NA       |
| XS_VLDL_C_pct   | -4.4803    | 5.40E-05 | -3.3134     | 4.59E-03      | -0.0422  | 0.0651 | -0.6475 | 2.59E-01 | 3.81E-01 |
| XS_VLDL_CE_pct  | -4.4158    | 6.11E-05 | -3.2712     | 5.03E-03      | -0.0391  | 0.0562 | -0.6951 | 2.43E-01 | 3.61E-01 |
| M_HDL_FC_pct    | -4.3532    | 7.95E-05 | -4.3714     | 1.02E-03      | -0.0713  | 0.0436 | -1.6362 | 5.09E-02 | 9.84E-02 |
| M_VLDL_C_pct    | -4.3406    | 8.22E-05 | -3.0113     | 9.67E-03      | -0.0398  | 0.0369 | -1.0785 | 1.40E-01 | 2.29E-01 |
| L_HDL_PL_pct    | 4.2874     | 9.58E-05 | 2.4316      | 4.02E-02      | 0.0552   | 0.0361 | 1.5306  | 6.29E-02 | 1.19E-01 |
| HDL_FC          | -4.2133    | 1.21E-04 | -3.1932     | 6.26E-03      | NA       | NA     | NA      | NA       | NA       |
| M_VLDL_FC_pct   | -4.0342    | 2.35E-04 | -2.8138     | 1.72E-02      | 0.0423   | 0.0318 | 1.3274  | 9.22E-02 | 1.63E-01 |
| S_HDL_FC_pct    | -4.0341    | 2.35E-04 | -2.7479     | 2.01E-02      | -0.0518  | 0.0409 | -1.2658 | 1.03E-01 | 1.76E-01 |
| XL_VLDL_TG_pct  | 3.9728     | 2.90E-04 | 3.3047      | 4.64E-03      | 0.0064   | 0.0057 | 1.1258  | 8.70E-01 | 9.08E-01 |
| Citrate         | -3.8896    | 4.03E-04 | -3.1055     | 7.75E-03      | -0.0291  | 2.6604 | -0.0109 | 5.04E-01 | 6.44E-01 |
| M_HDL_TG        | 3.5756     | 1.21E-03 | 2.7780      | 1.89E-02      | 0.0583   | 0.0462 | 1.2608  | 1.04E-01 | 1.77E-01 |
| XL_VLDL_FC_pct  | -3.4972    | 1.58E-03 | -2.6617     | 2.33E-02      | 0.0284   | 0.0604 | 0.4698  | 3.19E-01 | 4.48E-01 |
| IDL_C_pct       | -3.4662    | 1.75E-03 | -2.7452     | 2.01E-02      | -0.0526  | 0.0492 | -1.0691 | 1.43E-01 | 2.31E-01 |
| VLDL_L          | 3.4629     | 1.75E-03 | 2.9928      | 1.01E-02      | NA       | NA     | NA      | NA       | NA       |
| HDL_L           | -3.4353    | 1.91E-03 | -2.7125     | 2.16E-02      | NA       | NA     | NA      | NA       | NA       |
| PUFA_pct        | -3.4085    | 2.08E-03 | -2.4545     | 3.86E-02      | -0.0763  | 0.0397 | -1.9211 | 2.74E-02 | 5.57E-02 |
| Sphingomyelins  | -3.3342    | 2.60E-03 | -2.6687     | 2.33E-02      | -0.0369  | 0.0271 | -1.3607 | 8.68E-02 | 1.56E-01 |
| L_LDL_TG_pct    | 3.2774     | 3.11E-03 | 2.6638      | 2.33E-02      | 0.0651   | 0.0384 | 1.6941  | 4.51E-02 | 8.87E-02 |
| Omega_6_pct     | -3.2696    | 3.15E-03 | -2.5373     | 3.13E-02      | -0.0752  | 0.0469 | -1.6027 | 5.45E-02 | 1.04E-01 |
| Unsaturation    | -3.2611    | 3.16E-03 | -2.1188     | 7.87E-02      | -0.0172  | 0.0255 | -0.6769 | 7.51E-01 | 8.26E-01 |
| L_VLDL_CE_pct   | -3.0529    | 6.13E-03 | -2.6298     | 2.53E-02      | 0.0009   | 0.0004 | 1.9306  | 9.73E-01 | 9.76E-01 |
| IDL_FC          | -3.0020    | 7.00E-03 | -1.8112     | 1.48E-01      | -0.0383  | 0.0258 | -1.4843 | 6.89E-02 | 1.26E-01 |
| VLDL_PL         | 2.9980     | 7.00E-03 | 2.6647      | 2.33E-02      | NA       | NA     | NA      | NA       | NA       |
| XL_HDL_FC_pct   | 3.0057     | 7.00E-03 | 2.1918      | 6.86E-02      | -0.0230  | 0.9432 | -0.0244 | 5.10E-01 | 6.48E-01 |
| S_HDL_C_pct     | -2.9784    | 7.36E-03 | -2.4175     | 4.13E-02      | -0.0644  | 0.0506 | -1.2743 | 1.01E-01 | 1.75E-01 |
| M_VLDL_CE_pct   | -2.8792    | 1.00E-02 | -1.9792     | 1.07E-01      | -0.0184  | 0.0540 | -0.3405 | 3.67E-01 | 4.99E-01 |
| HDL_PL          | -2.8594    | 1.04E-02 | -2.2885     | 5.56E-02      | NA       | NA     | NA      | NA       | NA       |
| XXL_VLDL_PL_pct | 2.7822     | 1.31E-02 | 2.7237      | 2.12E-02      | -0.0095  | 0.0134 | -0.7132 | 7.62E-01 | 8.31E-01 |
| Pyruvate        | 2.7337     | 1.50E-02 | 1.8743      | 1.32E-01      | NA       | NA     | NA      | NA       | NA       |
| M_IDL_TG_pct    | 2.7222     | 1.54E-02 | 2.2444      | 6.12E-02      | 0.0600   | 0.0364 | 1.6456  | 4.99E-02 | 9.73E-02 |
| Ala             | 2.7183     | 1.54E-02 | 1.7793      | 1.56E-01      | 0.0237   | 0.0307 | 0.7722  | 2.20E-01 | 3.35E-01 |
| IDL_C           | -2.6507    | 1.85E-02 | -1.7656     | 1.58E-01      | -0.0100  | 0.0297 | -0.3371 | 6.32E-01 | 7.42E-01 |
| IDL_CE          | -2.5023    | 2.79E-02 | -1.7277     | 1.65E-01      | 0.0073   | 0.0123 | 0.5969  | 7.25E-01 | 8.05E-01 |
| VLDL_FC         | 2.4925     | 2.85E-02 | 2.3186      | 5.19E-02      | NA       | NA     | NA      | NA       | NA       |
| S_LDL_PL_pct    | -2.4475    | 3.17E-02 | -1.5020     | 2.37E-01      | 0.0208   | 0.0423 | 0.4914  | 3.12E-01 | 4.42E-01 |
| IDL_CE_pct      | -2.4284    | 3.31E-02 | -2.3249     | 5.16E-02      | 0.0027   | 0.0017 | 1.5633  | 9.41E-01 | 9.55E-01 |
| Total_CE        | -2.4087    | 3.47E-02 | -1.5525     | 2.21E-01      | -0.0358  | 0.0269 | -1.3296 | 9.18E-02 | 1.63E-01 |
| M_IDL_TG        | 2.3899     | 3.62E-02 | 2.2282      | 6.31E-02      | 0.0303   | 0.0273 | 1.1079  | 1.34E-01 | 2.22E-01 |
| HDL_P           | -2.3435    | 4.03E-02 | -1.9361     | 1.16E-01      | NA       | NA     | NA      | NA       | NA       |
| LA_pct          | -2.2577    | 4.89E-02 | -1.5382     | 2.24E-01      | -0.0247  | 0.1030 | -0.2398 | 5.95E-01 | 7.16E-01 |
| IDL_L           | -2.2545    | 4.89E-02 | -1.4153     | 2.70E-01      | -0.0015  | 0.0009 | -1.5865 | 9.44E-01 | 9.55E-01 |
| L_VLDL_PL_pct   | 2.2547     | 4.89E-02 | 1.1187      | 4.05E-01      | 0.0041   | 0.0040 | 1.0085  | 8.43E-01 | 8.90E-01 |
| Total_P         | -2.2516    | 4.89E-02 | -1.7578     | 1.59E-01      | NA       | NA     | NA      | NA       | NA       |

**eTable 5. Results of replication in the PReDICT study**

| Metabolite                 | N   | HRSD-17 |            |          | HRSA    |            |          |
|----------------------------|-----|---------|------------|----------|---------|------------|----------|
|                            |     | Beta    | Std. Error | Pr(> t ) | Beta    | Std. Error | Pr(> t ) |
| Pyruvate                   | 163 | 0.00006 | 0.00002    | 2.56E-02 | 0.00013 | 0.00004    | 7.18E-04 |
| Citric acid                | 208 | -0.001  | 0.0005     | 4.18E-02 | -0.0026 | 0.00077    | 9.19E-04 |
| L_Alanine                  | 208 | 0       | 0.00018    | 9.88E-01 | 0.00018 | 0.00028    | 5.17E-01 |
| C18:2(cis_9,12)            | 208 | -0.0003 | 0.00017    | 7.35E-02 | -0.0005 | 0.00026    | 3.84E-02 |
| C18:3(cis_6,9,12)          | 208 | -0.0169 | 0.00963    | 8.13E-02 | -0.0249 | 0.01494    | 9.78E-02 |
| C18:3(cis_9,12,15)         | 208 | -0.0031 | 0.00163    | 6.05E-02 | -0.0054 | 0.00252    | 3.38E-02 |
| C19:2(cis_10,13)           | 208 | -0.0247 | 0.01302    | 5.89E-02 | -0.0547 | 0.02       | 6.84E-03 |
| C20:2(cis_11,14)           | 208 | -0.006  | 0.0036     | 9.82E-02 | -0.0109 | 0.00557    | 5.14E-02 |
| C20:3(cis_8,11,14)         | 208 | -0.0067 | 0.00649    | 3.05E-01 | -0.0091 | 0.01006    | 3.65E-01 |
| C20:4(cis_5,8,11,14)       | 208 | -0.0061 | 0.00302    | 4.39E-02 | -0.0158 | 0.0046     | 7.57E-04 |
| C20:5(cis_5,8,11,14,17)    | 208 | -0.0251 | 0.0143     | 8.11E-02 | -0.0635 | 0.02189    | 4.17E-03 |
| C22:4(cis_7,10,13,16)      | 208 | -0.0131 | 0.00658    | 4.75E-02 | -0.0235 | 0.01017    | 2.17E-02 |
| C22:5(cis_4,7,10,13,16)    | 208 | -0.0188 | 0.01661    | 2.59E-01 | -0.0227 | 0.02579    | 3.79E-01 |
| C22:5(cis_7,10,13,16,19)   | 208 | -0.0158 | 0.00764    | 3.98E-02 | -0.0344 | 0.01172    | 3.75E-03 |
| C22:6(cis_4,7,10,13,16,19) | 208 | -0.0026 | 0.00398    | 5.18E-01 | -0.0084 | 0.00615    | 1.74E-01 |



**eTable 6. Results of Mendelian Randomization analysis**

| method                    | nsnp | b          | se        | pval      | analysis     | exposure | outcome |
|---------------------------|------|------------|-----------|-----------|--------------|----------|---------|
| MR Egger                  | 57   | 0.0667223  | 0.067091  | 0.3243329 | TwoSample_MR | Ala      | MDD     |
| Weighted median           | 57   | 0.0378879  | 0.0301999 | 0.209635  | TwoSample_MR | Ala      | MDD     |
| Inverse variance weighted | 57   | 0.0092916  | 0.0281596 | 0.741428  | TwoSample_MR | Ala      | MDD     |
| Simple mode               | 57   | 0.0120272  | 0.0660859 | 0.8562451 | TwoSample_MR | Ala      | MDD     |
| Weighted mode             | 57   | 0.0335892  | 0.053407  | 0.5319529 | TwoSample_MR | Ala      | MDD     |
| MR Egger                  | 92   | 0.0077517  | 0.0284373 | 0.7857941 | TwoSample_MR | ApoA1    | MDD     |
| Weighted median           | 92   | 0.0058253  | 0.0184715 | 0.7524833 | TwoSample_MR | ApoA1    | MDD     |
| Inverse variance weighted | 92   | 0.0224671  | 0.0167259 | 0.1791917 | TwoSample_MR | ApoA1    | MDD     |
| Simple mode               | 92   | -0.0048043 | 0.0333036 | 0.8856166 | TwoSample_MR | ApoA1    | MDD     |
| Weighted mode             | 92   | 0.0077864  | 0.0190952 | 0.6844018 | TwoSample_MR | ApoA1    | MDD     |
| MR Egger                  | 48   | -0.0189866 | 0.0325635 | 0.5626993 | TwoSample_MR | Citrate  | MDD     |
| Weighted median           | 48   | 0.0137925  | 0.0269352 | 0.6086086 | TwoSample_MR | Citrate  | MDD     |
| Inverse variance weighted | 48   | 0.0068533  | 0.0191829 | 0.7208962 | TwoSample_MR | Citrate  | MDD     |
| Simple mode               | 48   | 0.0519499  | 0.0535942 | 0.3373479 | TwoSample_MR | Citrate  | MDD     |
| Weighted mode             | 48   | 0.0037736  | 0.0280376 | 0.8935094 | TwoSample_MR | Citrate  | MDD     |
| MR Egger                  | 128  | -0.0200796 | 0.0214208 | 0.3503525 | TwoSample_MR | HDL_CE   | MDD     |
| Weighted median           | 128  | -0.0121994 | 0.0173502 | 0.4819766 | TwoSample_MR | HDL_CE   | MDD     |
| Inverse variance weighted | 128  | 0.0010975  | 0.0132909 | 0.9341871 | TwoSample_MR | HDL_CE   | MDD     |
| Simple mode               | 128  | -0.0475196 | 0.0335391 | 0.1589778 | TwoSample_MR | HDL_CE   | MDD     |
| Weighted mode             | 128  | -0.0108873 | 0.0186774 | 0.560985  | TwoSample_MR | HDL_CE   | MDD     |
| MR Egger                  | 122  | -0.0205654 | 0.0215699 | 0.3422883 | TwoSample_MR | HDL_C    | MDD     |
| Weighted median           | 122  | -0.0038288 | 0.017248  | 0.824325  | TwoSample_MR | HDL_C    | MDD     |
| Inverse variance weighted | 122  | -0.0017461 | 0.013293  | 0.8954955 | TwoSample_MR | HDL_C    | MDD     |
| Simple mode               | 122  | -0.0471621 | 0.0327384 | 0.1522883 | TwoSample_MR | HDL_C    | MDD     |
| Weighted mode             | 122  | -0.00338   | 0.017881  | 0.850386  | TwoSample_MR | HDL_C    | MDD     |
| MR Egger                  | 111  | -0.0069945 | 0.0226385 | 0.7579393 | TwoSample_MR | HDL_FC   | MDD     |
| Weighted median           | 111  | -0.0116492 | 0.018655  | 0.5323295 | TwoSample_MR | HDL_FC   | MDD     |
| Inverse variance weighted | 111  | -0.0094322 | 0.0142742 | 0.5087501 | TwoSample_MR | HDL_FC   | MDD     |
| Simple mode               | 111  | -0.0289881 | 0.0362238 | 0.425291  | TwoSample_MR | HDL_FC   | MDD     |
| Weighted mode             | 111  | -0.0026424 | 0.0170151 | 0.8768724 | TwoSample_MR | HDL_FC   | MDD     |
| MR Egger                  | 104  | 0.0041479  | 0.0261135 | 0.8741081 | TwoSample_MR | HDL_L    | MDD     |
| Weighted median           | 104  | 0.0025879  | 0.0183389 | 0.8877784 | TwoSample_MR | HDL_L    | MDD     |
| Inverse variance weighted | 104  | 0.0105573  | 0.0157385 | 0.502349  | TwoSample_MR | HDL_L    | MDD     |
| Simple mode               | 104  | -0.0072872 | 0.0351068 | 0.8359731 | TwoSample_MR | HDL_L    | MDD     |
| Weighted mode             | 104  | 0.0059389  | 0.0177404 | 0.7384809 | TwoSample_MR | HDL_L    | MDD     |
| MR Egger                  | 95   | -0.0083284 | 0.0279203 | 0.7661444 | TwoSample_MR | HDL_PL   | MDD     |
| Weighted median           | 95   | 0.0019159  | 0.0178419 | 0.9144847 | TwoSample_MR | HDL_PL   | MDD     |
| Inverse variance weighted | 95   | 0.0164131  | 0.0168569 | 0.3302201 | TwoSample_MR | HDL_PL   | MDD     |
| Simple mode               | 95   | -0.009229  | 0.0304663 | 0.7626173 | TwoSample_MR | HDL_PL   | MDD     |
| Weighted mode             | 95   | 0.0036322  | 0.0173544 | 0.8346689 | TwoSample_MR | HDL_PL   | MDD     |
| MR Egger                  | 89   | 0.0249119  | 0.0313452 | 0.4289167 | TwoSample_MR | HDL_P    | MDD     |
| Weighted median           | 89   | 0.014967   | 0.0224091 | 0.5041989 | TwoSample_MR | HDL_P    | MDD     |
| Inverse variance weighted | 89   | 0.0143508  | 0.0177373 | 0.4184715 | TwoSample_MR | HDL_P    | MDD     |
| Simple mode               | 89   | -0.0071042 | 0.036939  | 0.8479323 | TwoSample_MR | HDL_P    | MDD     |
| Weighted mode             | 89   | 0.0053626  | 0.0218926 | 0.8070671 | TwoSample_MR | HDL_P    | MDD     |
| MR Egger                  | 93   | 0.0005753  | 0.0177854 | 0.974265  | TwoSample_MR | HDL_TG   | MDD     |
| Weighted median           | 93   | 0.0054625  | 0.014983  | 0.7154268 | TwoSample_MR | HDL_TG   | MDD     |
| Inverse variance weighted | 93   | 0.0167021  | 0.0122349 | 0.1722153 | TwoSample_MR | HDL_TG   | MDD     |
| Simple mode               | 93   | -0.0033009 | 0.0263093 | 0.9004283 | TwoSample_MR | HDL_TG   | MDD     |
| Weighted mode             | 93   | 0.0036933  | 0.0125393 | 0.7690122 | TwoSample_MR | HDL_TG   | MDD     |
| MR Egger                  | 127  | -0.0081725 | 0.0198247 | 0.68087   | TwoSample_MR | HDL_size | MDD     |
| Weighted median           | 127  | -0.0057269 | 0.0152923 | 0.7080376 | TwoSample_MR | HDL_size | MDD     |
| Inverse variance weighted | 127  | -0.0091093 | 0.0129453 | 0.4816325 | TwoSample_MR | HDL_size | MDD     |
| Simple mode               | 127  | 0.0054609  | 0.033346  | 0.8701796 | TwoSample_MR | HDL_size | MDD     |
| Weighted mode             | 127  | -0.0049641 | 0.0132699 | 0.7089714 | TwoSample_MR | HDL_size | MDD     |
| MR Egger                  | 78   | -0.0289804 | 0.0182128 | 0.1157133 | TwoSample_MR | IDL_CE   | MDD     |
| Weighted median           | 78   | -0.0176928 | 0.016629  | 0.287341  | TwoSample_MR | IDL_CE   | MDD     |
| Inverse variance weighted | 78   | -0.0278218 | 0.0129782 | 0.0320539 | TwoSample_MR | IDL_CE   | MDD     |

|                           |     |            |           |           |              |              |     |
|---------------------------|-----|------------|-----------|-----------|--------------|--------------|-----|
| Simple mode               | 78  | -0.027737  | 0.0376587 | 0.4636421 | TwoSample_MR | IDL_CE       | MDD |
| Weighted mode             | 78  | -0.0163256 | 0.0154278 | 0.2932754 | TwoSample_MR | IDL_CE       | MDD |
| MR Egger                  | 94  | -0.008195  | 0.0164745 | 0.6200682 | TwoSample_MR | IDL_CE_pct   | MDD |
| Weighted median           | 94  | -0.0080828 | 0.0150541 | 0.5913266 | TwoSample_MR | IDL_CE_pct   | MDD |
| Inverse variance weighted | 94  | -0.0114469 | 0.0118357 | 0.3334684 | TwoSample_MR | IDL_CE_pct   | MDD |
| Simple mode               | 94  | -0.0051527 | 0.0268457 | 0.8482091 | TwoSample_MR | IDL_CE_pct   | MDD |
| Weighted mode             | 94  | -0.0016703 | 0.0128886 | 0.8971654 | TwoSample_MR | IDL_CE_pct   | MDD |
| MR Egger                  | 76  | -0.0297718 | 0.0181576 | 0.1053275 | TwoSample_MR | IDL_C        | MDD |
| Weighted median           | 76  | -0.0186075 | 0.0170412 | 0.2748716 | TwoSample_MR | IDL_C        | MDD |
| Inverse variance weighted | 76  | -0.0302202 | 0.012855  | 0.0187306 | TwoSample_MR | IDL_C        | MDD |
| Simple mode               | 76  | -0.033019  | 0.0348359 | 0.346254  | TwoSample_MR | IDL_C        | MDD |
| Weighted mode             | 76  | -0.01858   | 0.0152302 | 0.2263069 | TwoSample_MR | IDL_C        | MDD |
| MR Egger                  | 104 | -0.0169743 | 0.016344  | 0.3014636 | TwoSample_MR | IDL_C_pct    | MDD |
| Weighted median           | 104 | -0.0095834 | 0.0146295 | 0.5124206 | TwoSample_MR | IDL_C_pct    | MDD |
| Inverse variance weighted | 104 | -0.0188773 | 0.011407  | 0.0979483 | TwoSample_MR | IDL_C_pct    | MDD |
| Simple mode               | 104 | -0.0125942 | 0.025389  | 0.6209154 | TwoSample_MR | IDL_C_pct    | MDD |
| Weighted mode             | 104 | -0.0090207 | 0.0126795 | 0.4784209 | TwoSample_MR | IDL_C_pct    | MDD |
| MR Egger                  | 74  | -0.0370013 | 0.0193086 | 0.0592958 | TwoSample_MR | IDL_FC       | MDD |
| Weighted median           | 74  | -0.021598  | 0.0170439 | 0.2050846 | TwoSample_MR | IDL_FC       | MDD |
| Inverse variance weighted | 74  | -0.0295749 | 0.01347   | 0.0281196 | TwoSample_MR | IDL_FC       | MDD |
| Simple mode               | 74  | -0.0248108 | 0.0364707 | 0.4984707 | TwoSample_MR | IDL_FC       | MDD |
| Weighted mode             | 74  | -0.019615  | 0.0162453 | 0.2311654 | TwoSample_MR | IDL_FC       | MDD |
| MR Egger                  | 69  | -0.0362612 | 0.0256144 | 0.1615078 | TwoSample_MR | IDL_FC_pct   | MDD |
| Weighted median           | 69  | -0.0304001 | 0.0225917 | 0.1784218 | TwoSample_MR | IDL_FC_pct   | MDD |
| Inverse variance weighted | 69  | -0.0515628 | 0.0155247 | 0.0008959 | TwoSample_MR | IDL_FC_pct   | MDD |
| Simple mode               | 69  | -0.0302166 | 0.0401056 | 0.4537951 | TwoSample_MR | IDL_FC_pct   | MDD |
| Weighted mode             | 69  | -0.033304  | 0.0254094 | 0.1943687 | TwoSample_MR | IDL_FC_pct   | MDD |
| MR Egger                  | 75  | -0.0226958 | 0.0193935 | 0.2456964 | TwoSample_MR | IDL_L        | MDD |
| Weighted median           | 75  | -0.0193819 | 0.0167591 | 0.2474774 | TwoSample_MR | IDL_L        | MDD |
| Inverse variance weighted | 75  | -0.026011  | 0.0136397 | 0.0565208 | TwoSample_MR | IDL_L        | MDD |
| Simple mode               | 75  | -0.0263161 | 0.0358091 | 0.4647224 | TwoSample_MR | IDL_L        | MDD |
| Weighted mode             | 75  | -0.0180957 | 0.0159971 | 0.2616283 | TwoSample_MR | IDL_L        | MDD |
| MR Egger                  | 97  | -0.0021349 | 0.020635  | 0.9178162 | TwoSample_MR | IDL_TG       | MDD |
| Weighted median           | 97  | 0.02102    | 0.0162981 | 0.1971479 | TwoSample_MR | IDL_TG       | MDD |
| Inverse variance weighted | 97  | 0.0070399  | 0.0128798 | 0.5846654 | TwoSample_MR | IDL_TG       | MDD |
| Simple mode               | 97  | -0.0024336 | 0.0297932 | 0.9350684 | TwoSample_MR | IDL_TG       | MDD |
| Weighted mode             | 97  | 0.0144356  | 0.0139887 | 0.3046883 | TwoSample_MR | IDL_TG       | MDD |
| MR Egger                  | 108 | 0.0224738  | 0.0195563 | 0.2530663 | TwoSample_MR | IDL_TG_pct   | MDD |
| Weighted median           | 108 | 0.0221403  | 0.015063  | 0.1416016 | TwoSample_MR | IDL_TG_pct   | MDD |
| Inverse variance weighted | 108 | 0.0367349  | 0.0133434 | 0.0059044 | TwoSample_MR | IDL_TG_pct   | MDD |
| Simple mode               | 108 | 0.0217959  | 0.029374  | 0.4597054 | TwoSample_MR | IDL_TG_pct   | MDD |
| Weighted mode             | 108 | 0.0181482  | 0.0135078 | 0.1819407 | TwoSample_MR | IDL_TG_pct   | MDD |
| MR Egger                  | 67  | 0.0144044  | 0.0317621 | 0.6516932 | TwoSample_MR | LA_pct       | MDD |
| Weighted median           | 67  | 0.0493091  | 0.0244039 | 0.0433271 | TwoSample_MR | LA_pct       | MDD |
| Inverse variance weighted | 67  | 0.0145732  | 0.0197436 | 0.4604415 | TwoSample_MR | LA_pct       | MDD |
| Simple mode               | 67  | 0.0027054  | 0.0551532 | 0.961025  | TwoSample_MR | LA_pct       | MDD |
| Weighted mode             | 67  | 0.0443028  | 0.0223115 | 0.0512299 | TwoSample_MR | LA_pct       | MDD |
| MR Egger                  | 147 | -0.0133302 | 0.020707  | 0.5207523 | TwoSample_MR | L_HDL_CE     | MDD |
| Weighted median           | 147 | -0.014472  | 0.0178187 | 0.416686  | TwoSample_MR | L_HDL_CE     | MDD |
| Inverse variance weighted | 147 | -0.0123161 | 0.0131632 | 0.3494526 | TwoSample_MR | L_HDL_CE     | MDD |
| Simple mode               | 147 | -0.0147702 | 0.0321983 | 0.6471135 | TwoSample_MR | L_HDL_CE     | MDD |
| Weighted mode             | 147 | -0.0107834 | 0.0137928 | 0.4355901 | TwoSample_MR | L_HDL_CE     | MDD |
| MR Egger                  | 110 | -0.0195947 | 0.0226101 | 0.3880643 | TwoSample_MR | L_HDL_CE_pct | MDD |
| Weighted median           | 110 | -0.0306698 | 0.0169305 | 0.0700611 | TwoSample_MR | L_HDL_CE_pct | MDD |
| Inverse variance weighted | 110 | -0.0275854 | 0.0141483 | 0.0512077 | TwoSample_MR | L_HDL_CE_pct | MDD |
| Simple mode               | 110 | -0.046432  | 0.0318133 | 0.1472984 | TwoSample_MR | L_HDL_CE_pct | MDD |
| Weighted mode             | 110 | -0.0245063 | 0.0163202 | 0.1360931 | TwoSample_MR | L_HDL_CE_pct | MDD |
| MR Egger                  | 147 | -0.0179553 | 0.0202215 | 0.3760485 | TwoSample_MR | L_HDL_C      | MDD |
| Weighted median           | 147 | -0.0141883 | 0.016723  | 0.3961987 | TwoSample_MR | L_HDL_C      | MDD |
| Inverse variance weighted | 147 | -0.0118204 | 0.0129199 | 0.3602422 | TwoSample_MR | L_HDL_C      | MDD |
| Simple mode               | 147 | -0.033297  | 0.0323108 | 0.3044685 | TwoSample_MR | L_HDL_C      | MDD |
| Weighted mode             | 147 | -0.0147807 | 0.0138187 | 0.2865583 | TwoSample_MR | L_HDL_C      | MDD |

|                           |     |            |           |           |              |               |     |
|---------------------------|-----|------------|-----------|-----------|--------------|---------------|-----|
| MR Egger                  | 121 | -0.0181402 | 0.0188918 | 0.338894  | TwoSample_MR | L_HDL_C_pct   | MDD |
| Weighted median           | 121 | -0.0319756 | 0.0171231 | 0.0618459 | TwoSample_MR | L_HDL_C_pct   | MDD |
| Inverse variance weighted | 121 | -0.024741  | 0.0121776 | 0.0421867 | TwoSample_MR | L_HDL_C_pct   | MDD |
| Simple mode               | 121 | -0.037644  | 0.0336221 | 0.2651124 | TwoSample_MR | L_HDL_C_pct   | MDD |
| Weighted mode             | 121 | -0.0237925 | 0.0157836 | 0.1343301 | TwoSample_MR | L_HDL_C_pct   | MDD |
| MR Egger                  | 138 | -0.0216217 | 0.0193717 | 0.2663274 | TwoSample_MR | L_HDL_FC      | MDD |
| Weighted median           | 138 | -0.0234829 | 0.0159361 | 0.1405985 | TwoSample_MR | L_HDL_FC      | MDD |
| Inverse variance weighted | 138 | -0.0114222 | 0.0127508 | 0.3703564 | TwoSample_MR | L_HDL_FC      | MDD |
| Simple mode               | 138 | -0.0216931 | 0.0305429 | 0.4787576 | TwoSample_MR | L_HDL_FC      | MDD |
| Weighted mode             | 138 | -0.0140939 | 0.0144337 | 0.3305588 | TwoSample_MR | L_HDL_FC      | MDD |
| MR Egger                  | 93  | -0.0208117 | 0.0189768 | 0.2756686 | TwoSample_MR | L_HDL_FC_pct  | MDD |
| Weighted median           | 93  | -0.0138572 | 0.0144451 | 0.3374071 | TwoSample_MR | L_HDL_FC_pct  | MDD |
| Inverse variance weighted | 93  | -0.0394307 | 0.0134497 | 0.0033709 | TwoSample_MR | L_HDL_FC_pct  | MDD |
| Simple mode               | 93  | -0.024212  | 0.0297823 | 0.4183366 | TwoSample_MR | L_HDL_FC_pct  | MDD |
| Weighted mode             | 93  | -0.0162187 | 0.0133235 | 0.2266013 | TwoSample_MR | L_HDL_FC_pct  | MDD |
| MR Egger                  | 143 | -0.0152596 | 0.0196828 | 0.4394732 | TwoSample_MR | L_HDL_L       | MDD |
| Weighted median           | 143 | -0.0150206 | 0.0157814 | 0.3412037 | TwoSample_MR | L_HDL_L       | MDD |
| Inverse variance weighted | 143 | -0.0107968 | 0.0128592 | 0.401122  | TwoSample_MR | L_HDL_L       | MDD |
| Simple mode               | 143 | -0.0246487 | 0.0327604 | 0.4530605 | TwoSample_MR | L_HDL_L       | MDD |
| Weighted mode             | 143 | -0.0136424 | 0.0139611 | 0.3301453 | TwoSample_MR | L_HDL_L       | MDD |
| MR Egger                  | 132 | -0.0132372 | 0.0195424 | 0.4993831 | TwoSample_MR | L_HDL_PL      | MDD |
| Weighted median           | 132 | -0.01298   | 0.0167522 | 0.438442  | TwoSample_MR | L_HDL_PL      | MDD |
| Inverse variance weighted | 132 | -0.0103831 | 0.0127513 | 0.4154848 | TwoSample_MR | L_HDL_PL      | MDD |
| Simple mode               | 132 | -0.0368031 | 0.0310574 | 0.2381618 | TwoSample_MR | L_HDL_PL      | MDD |
| Weighted mode             | 132 | -0.0156784 | 0.014296  | 0.2747831 | TwoSample_MR | L_HDL_PL      | MDD |
| MR Egger                  | 113 | 0.0319482  | 0.0274729 | 0.2473639 | TwoSample_MR | L_HDL_PL_pct  | MDD |
| Weighted median           | 113 | 0.034956   | 0.0182565 | 0.0555285 | TwoSample_MR | L_HDL_PL_pct  | MDD |
| Inverse variance weighted | 113 | 0.0388777  | 0.0156737 | 0.013122  | TwoSample_MR | L_HDL_PL_pct  | MDD |
| Simple mode               | 113 | 0.0294069  | 0.0343561 | 0.3938563 | TwoSample_MR | L_HDL_PL_pct  | MDD |
| Weighted mode             | 113 | 0.0258127  | 0.0181764 | 0.15835   | TwoSample_MR | L_HDL_PL_pct  | MDD |
| MR Egger                  | 145 | -0.0175477 | 0.0193964 | 0.3671528 | TwoSample_MR | L_HDL_P       | MDD |
| Weighted median           | 145 | -0.0145798 | 0.0168053 | 0.3856307 | TwoSample_MR | L_HDL_P       | MDD |
| Inverse variance weighted | 145 | -0.0084792 | 0.0126673 | 0.5032579 | TwoSample_MR | L_HDL_P       | MDD |
| Simple mode               | 145 | -0.0263388 | 0.0329921 | 0.4259887 | TwoSample_MR | L_HDL_P       | MDD |
| Weighted mode             | 145 | -0.0113731 | 0.0139775 | 0.4171766 | TwoSample_MR | L_HDL_P       | MDD |
| MR Egger                  | 115 | 0.0158246  | 0.0184772 | 0.3935669 | TwoSample_MR | L_HDL_TG_pct  | MDD |
| Weighted median           | 115 | 0.0247651  | 0.0156719 | 0.1140574 | TwoSample_MR | L_HDL_TG_pct  | MDD |
| Inverse variance weighted | 115 | 0.0155953  | 0.0122304 | 0.2022637 | TwoSample_MR | L_HDL_TG_pct  | MDD |
| Simple mode               | 115 | 0.0111314  | 0.0279463 | 0.6911439 | TwoSample_MR | L_HDL_TG_pct  | MDD |
| Weighted mode             | 115 | 0.019673   | 0.0145946 | 0.18034   | TwoSample_MR | L_HDL_TG_pct  | MDD |
| MR Egger                  | 96  | 0.0137518  | 0.0160807 | 0.3946299 | TwoSample_MR | L_LDL_TG_pct  | MDD |
| Weighted median           | 96  | 0.0076081  | 0.0156109 | 0.6260041 | TwoSample_MR | L_LDL_TG_pct  | MDD |
| Inverse variance weighted | 96  | 0.0213182  | 0.0113317 | 0.0599313 | TwoSample_MR | L_LDL_TG_pct  | MDD |
| Simple mode               | 96  | 0.0189319  | 0.029183  | 0.5180791 | TwoSample_MR | L_LDL_TG_pct  | MDD |
| Weighted mode             | 96  | 0.0035656  | 0.0134379 | 0.7913239 | TwoSample_MR | L_LDL_TG_pct  | MDD |
| MR Egger                  | 90  | 0.0204596  | 0.0225623 | 0.3669856 | TwoSample_MR | L_VLDL_CE     | MDD |
| Weighted median           | 90  | 0.0133007  | 0.0179707 | 0.4592204 | TwoSample_MR | L_VLDL_CE     | MDD |
| Inverse variance weighted | 90  | -0.004315  | 0.0135046 | 0.7493296 | TwoSample_MR | L_VLDL_CE     | MDD |
| Simple mode               | 90  | 0.015517   | 0.0335452 | 0.6448021 | TwoSample_MR | L_VLDL_CE     | MDD |
| Weighted mode             | 90  | 0.0126011  | 0.0184024 | 0.4952776 | TwoSample_MR | L_VLDL_CE     | MDD |
| MR Egger                  | 92  | -0.0278373 | 0.0211825 | 0.1921297 | TwoSample_MR | L_VLDL_CE_pct | MDD |
| Weighted median           | 92  | -0.0258279 | 0.0167398 | 0.1228542 | TwoSample_MR | L_VLDL_CE_pct | MDD |
| Inverse variance weighted | 92  | -0.0501386 | 0.0135641 | 0.0002187 | TwoSample_MR | L_VLDL_CE_pct | MDD |
| Simple mode               | 92  | -0.0042013 | 0.0290767 | 0.885434  | TwoSample_MR | L_VLDL_CE_pct | MDD |
| Weighted mode             | 92  | -0.0220466 | 0.0153101 | 0.1532982 | TwoSample_MR | L_VLDL_CE_pct | MDD |
| MR Egger                  | 90  | 0.0233637  | 0.0233943 | 0.3206823 | TwoSample_MR | L_VLDL_C      | MDD |
| Weighted median           | 90  | 0.0231563  | 0.0181669 | 0.2024348 | TwoSample_MR | L_VLDL_C      | MDD |
| Inverse variance weighted | 90  | 0.0039428  | 0.014225  | 0.7816457 | TwoSample_MR | L_VLDL_C      | MDD |
| Simple mode               | 90  | 0.007521   | 0.0315463 | 0.8121112 | TwoSample_MR | L_VLDL_C      | MDD |
| Weighted mode             | 90  | 0.0140711  | 0.017427  | 0.4215727 | TwoSample_MR | L_VLDL_C      | MDD |
| MR Egger                  | 95  | 0.0203543  | 0.0223967 | 0.3657997 | TwoSample_MR | L_VLDL_FC     | MDD |
| Weighted median           | 95  | 0.0231628  | 0.0183145 | 0.2059707 | TwoSample_MR | L_VLDL_FC     | MDD |

|                           |     |            |           |           |              |               |         |
|---------------------------|-----|------------|-----------|-----------|--------------|---------------|---------|
| Inverse variance weighted | 95  | 0.0077144  | 0.0139871 | 0.5812676 | TwoSample_MR | L_VLDL_FC     | MDD     |
| Simple mode               | 95  | 0.0152591  | 0.0301609 | 0.6140953 | TwoSample_MR | L_VLDL_FC     | MDD     |
| Weighted mode             | 95  | 0.0183598  | 0.0174559 | 0.2955958 | TwoSample_MR | L_VLDL_FC     | MDD     |
| MR Egger                  | 92  | 0.020775   | 0.021193  | 0.329576  | TwoSample_MR | L_VLDL_L      | MDD     |
| Weighted median           | 92  | 0.0231273  | 0.0181845 | 0.2034397 | TwoSample_MR | L_VLDL_L      | MDD     |
| Inverse variance weighted | 92  | 0.0100136  | 0.0132463 | 0.449677  | TwoSample_MR | L_VLDL_L      | MDD     |
| Simple mode               | 92  | 0.0043723  | 0.031619  | 0.8903242 | TwoSample_MR | L_VLDL_L      | MDD     |
| Weighted mode             | 92  | 0.019737   | 0.0181801 | 0.2805085 | TwoSample_MR | L_VLDL_L      | MDD     |
| MR Egger                  | 98  | 0.0159627  | 0.0221016 | 0.4719005 | TwoSample_MR | L_VLDL_PL     | MDD     |
| Weighted median           | 98  | 0.0239594  | 0.0178235 | 0.1788652 | TwoSample_MR | L_VLDL_PL     | MDD     |
| Inverse variance weighted | 98  | 0.0107863  | 0.0137873 | 0.4340182 | TwoSample_MR | L_VLDL_PL     | MDD     |
| Simple mode               | 98  | 0.0113303  | 0.0305256 | 0.711318  | TwoSample_MR | L_VLDL_PL     | MDD     |
| Weighted mode             | 98  | 0.0170118  | 0.0169154 | 0.3170601 | TwoSample_MR | L_VLDL_PL     | MDD     |
| MR Egger                  | 107 | 0.0159769  | 0.0200418 | 0.4271454 | TwoSample_MR | L_VLDL_PL_pct | MDD     |
| Weighted median           | 107 | -0.0109689 | 0.0166042 | 0.5088614 | TwoSample_MR | L_VLDL_PL_pct | MDD     |
| Inverse variance weighted | 107 | 0.0101405  | 0.0124924 | 0.4169469 | TwoSample_MR | L_VLDL_PL_pct | MDD     |
| Simple mode               | 107 | 0.0180708  | 0.031828  | 0.5713958 | TwoSample_MR | L_VLDL_PL_pct | MDD     |
| Weighted mode             | 107 | 0.0042174  | 0.0160973 | 0.7938335 | TwoSample_MR | L_VLDL_PL_pct | MDD     |
| MR Egger                  | 97  | 0.0140828  | 0.0221307 | 0.5260811 | TwoSample_MR | L_VLDL_P      | MDD     |
| Weighted median           | 97  | 0.0232153  | 0.0182028 | 0.2021799 | TwoSample_MR | L_VLDL_P      | MDD     |
| Inverse variance weighted | 97  | 0.0110675  | 0.0139069 | 0.4261335 | TwoSample_MR | L_VLDL_P      | MDD     |
| Simple mode               | 97  | 0.0055316  | 0.0284187 | 0.8460801 | TwoSample_MR | L_VLDL_P      | MDD     |
| Weighted mode             | 97  | 0.0168303  | 0.0169652 | 0.323667  | TwoSample_MR | L_VLDL_P      | MDD     |
| MR Egger                  | 100 | 0.0237174  | 0.0203006 | 0.2455149 | TwoSample_MR | L_VLDL_TG     | MDD     |
| Weighted median           | 100 | 0.0267263  | 0.0179061 | 0.1355464 | TwoSample_MR | L_VLDL_TG     | MDD     |
| Inverse variance weighted | 100 | 0.0186259  | 0.0129583 | 0.1506108 | TwoSample_MR | L_VLDL_TG     | MDD     |
| Simple mode               | 100 | 0.0093169  | 0.0303414 | 0.7594355 | TwoSample_MR | L_VLDL_TG     | MDD     |
| Weighted mode             | 100 | 0.0254808  | 0.0167269 | 0.1308604 | TwoSample_MR | L_VLDL_TG     | MDD     |
| MR Egger                  | 108 | 0.0429152  | 0.0849723 | 0.6145725 | TwoSample_MR | MDD           | Ala     |
| Weighted median           | 108 | -0.0052613 | 0.0233899 | 0.8220255 | TwoSample_MR | MDD           | Ala     |
| Inverse variance weighted | 108 | 0.0000488  | 0.0186586 | 0.9979142 | TwoSample_MR | MDD           | Ala     |
| Simple mode               | 108 | 0.0341722  | 0.0625182 | 0.5857943 | TwoSample_MR | MDD           | Ala     |
| Weighted mode             | 108 | 0.0278651  | 0.0589238 | 0.6372468 | TwoSample_MR | MDD           | Ala     |
| MR Egger                  | 108 | 0.1716817  | 0.0918296 | 0.0643037 | TwoSample_MR | MDD           | ApoA1   |
| Weighted median           | 108 | 0.0015291  | 0.0238761 | 0.9489366 | TwoSample_MR | MDD           | ApoA1   |
| Inverse variance weighted | 108 | -0.009673  | 0.0205248 | 0.6374378 | TwoSample_MR | MDD           | ApoA1   |
| Simple mode               | 108 | 0.0778783  | 0.0757384 | 0.3061495 | TwoSample_MR | MDD           | ApoA1   |
| Weighted mode             | 108 | 0.0808434  | 0.0730576 | 0.2709609 | TwoSample_MR | MDD           | ApoA1   |
| MR Egger                  | 108 | 0.0230932  | 0.0805891 | 0.7750122 | TwoSample_MR | MDD           | Citrate |
| Weighted median           | 108 | -0.0228207 | 0.0240303 | 0.342283  | TwoSample_MR | MDD           | Citrate |
| Inverse variance weighted | 108 | -0.0239407 | 0.0177045 | 0.1762994 | TwoSample_MR | MDD           | Citrate |
| Simple mode               | 108 | -0.0577916 | 0.0681501 | 0.3983287 | TwoSample_MR | MDD           | Citrate |
| Weighted mode             | 108 | -0.040612  | 0.063424  | 0.5233298 | TwoSample_MR | MDD           | Citrate |
| MR Egger                  | 108 | 0.1660635  | 0.0934113 | 0.0783097 | TwoSample_MR | MDD           | HDL_C   |
| Weighted median           | 108 | -0.047646  | 0.0236424 | 0.0438758 | TwoSample_MR | MDD           | HDL_C   |
| Inverse variance weighted | 108 | -0.0482568 | 0.0210142 | 0.0216537 | TwoSample_MR | MDD           | HDL_C   |
| Simple mode               | 108 | -0.0547498 | 0.0763523 | 0.4748943 | TwoSample_MR | MDD           | HDL_C   |
| Weighted mode             | 108 | -0.0488457 | 0.0675989 | 0.4715139 | TwoSample_MR | MDD           | HDL_C   |
| MR Egger                  | 108 | 0.1711233  | 0.0932204 | 0.0692074 | TwoSample_MR | MDD           | HDL_CE  |
| Weighted median           | 108 | -0.0524676 | 0.0230607 | 0.0228943 | TwoSample_MR | MDD           | HDL_CE  |
| Inverse variance weighted | 108 | -0.0497039 | 0.0210058 | 0.0179717 | TwoSample_MR | MDD           | HDL_CE  |
| Simple mode               | 108 | -0.0605757 | 0.0713844 | 0.398007  | TwoSample_MR | MDD           | HDL_CE  |
| Weighted mode             | 108 | -0.0636092 | 0.0731175 | 0.3862704 | TwoSample_MR | MDD           | HDL_CE  |
| MR Egger                  | 108 | 0.144876   | 0.0928055 | 0.1214877 | TwoSample_MR | MDD           | HDL_FC  |
| Weighted median           | 108 | -0.0275149 | 0.0227359 | 0.2262036 | TwoSample_MR | MDD           | HDL_FC  |
| Inverse variance weighted | 108 | -0.042645  | 0.0207606 | 0.0399634 | TwoSample_MR | MDD           | HDL_FC  |
| Simple mode               | 108 | 0.0022606  | 0.0733741 | 0.9754788 | TwoSample_MR | MDD           | HDL_FC  |
| Weighted mode             | 108 | 0.0135555  | 0.0681541 | 0.8427226 | TwoSample_MR | MDD           | HDL_FC  |
| MR Egger                  | 108 | 0.1764009  | 0.0913569 | 0.0561667 | TwoSample_MR | MDD           | HDL_L   |
| Weighted median           | 108 | -0.0074167 | 0.0236544 | 0.7538668 | TwoSample_MR | MDD           | HDL_L   |
| Inverse variance weighted | 108 | -0.0241873 | 0.0205085 | 0.2382479 | TwoSample_MR | MDD           | HDL_L   |
| Simple mode               | 108 | 0.0294969  | 0.0758773 | 0.6982377 | TwoSample_MR | MDD           | HDL_L   |

|                           |     |            |           |           |              |     |            |
|---------------------------|-----|------------|-----------|-----------|--------------|-----|------------|
| Weighted mode             | 108 | 0.0324806  | 0.0728643 | 0.6566656 | TwoSample_MR | MDD | HDL_L      |
| MR Egger                  | 108 | 0.1466165  | 0.0938509 | 0.1212149 | TwoSample_MR | MDD | HDL_P      |
| Weighted median           | 108 | -0.0019065 | 0.0247073 | 0.9384925 | TwoSample_MR | MDD | HDL_P      |
| Inverse variance weighted | 108 | 0.0002559  | 0.0208295 | 0.9901987 | TwoSample_MR | MDD | HDL_P      |
| Simple mode               | 108 | 0.1356337  | 0.0838858 | 0.1088477 | TwoSample_MR | MDD | HDL_P      |
| Weighted mode             | 108 | 0.1326871  | 0.0900653 | 0.1436242 | TwoSample_MR | MDD | HDL_P      |
| MR Egger                  | 108 | 0.1800691  | 0.0903589 | 0.0488513 | TwoSample_MR | MDD | HDL_PL     |
| Weighted median           | 108 | -0.0026711 | 0.0232668 | 0.9086023 | TwoSample_MR | MDD | HDL_PL     |
| Inverse variance weighted | 108 | -0.0137773 | 0.0202634 | 0.4965624 | TwoSample_MR | MDD | HDL_PL     |
| Simple mode               | 108 | 0.0563216  | 0.0690162 | 0.4162768 | TwoSample_MR | MDD | HDL_PL     |
| Weighted mode             | 108 | 0.0533411  | 0.0715225 | 0.4574266 | TwoSample_MR | MDD | HDL_PL     |
| MR Egger                  | 108 | 0.0501171  | 0.0989441 | 0.6135441 | TwoSample_MR | MDD | HDL_TG     |
| Weighted median           | 108 | 0.0758253  | 0.0268244 | 0.0047026 | TwoSample_MR | MDD | HDL_TG     |
| Inverse variance weighted | 108 | 0.084077   | 0.0217142 | 0.000108  | TwoSample_MR | MDD | HDL_TG     |
| Simple mode               | 108 | 0.1105927  | 0.079056  | 0.1647299 | TwoSample_MR | MDD | HDL_TG     |
| Weighted mode             | 108 | 0.1046043  | 0.0799921 | 0.1937836 | TwoSample_MR | MDD | HDL_TG     |
| MR Egger                  | 108 | 0.1470527  | 0.0945139 | 0.1227163 | TwoSample_MR | MDD | HDL_size   |
| Weighted median           | 108 | -0.0365008 | 0.0238352 | 0.1256751 | TwoSample_MR | MDD | HDL_size   |
| Inverse variance weighted | 108 | -0.0740735 | 0.021283  | 0.0005006 | TwoSample_MR | MDD | HDL_size   |
| Simple mode               | 108 | 0.0218232  | 0.0774008 | 0.7785259 | TwoSample_MR | MDD | HDL_size   |
| Weighted mode             | 108 | 0.0249414  | 0.0767589 | 0.7458676 | TwoSample_MR | MDD | HDL_size   |
| MR Egger                  | 108 | -0.0983424 | 0.0905414 | 0.2798723 | TwoSample_MR | MDD | IDL_C      |
| Weighted median           | 108 | -0.0830309 | 0.0248814 | 0.0008467 | TwoSample_MR | MDD | IDL_C      |
| Inverse variance weighted | 108 | -0.0624313 | 0.0198737 | 0.0016814 | TwoSample_MR | MDD | IDL_C      |
| Simple mode               | 108 | -0.1306796 | 0.0787589 | 0.0999968 | TwoSample_MR | MDD | IDL_C      |
| Weighted mode             | 108 | -0.1244711 | 0.0753567 | 0.1015154 | TwoSample_MR | MDD | IDL_C      |
| MR Egger                  | 108 | -0.0979286 | 0.0892744 | 0.2751535 | TwoSample_MR | MDD | IDL_CE     |
| Weighted median           | 108 | -0.0724667 | 0.0246902 | 0.0033351 | TwoSample_MR | MDD | IDL_CE     |
| Inverse variance weighted | 108 | -0.0597182 | 0.0195981 | 0.0023103 | TwoSample_MR | MDD | IDL_CE     |
| Simple mode               | 108 | -0.1309907 | 0.0749019 | 0.083188  | TwoSample_MR | MDD | IDL_CE     |
| Weighted mode             | 108 | -0.1250071 | 0.068924  | 0.0725274 | TwoSample_MR | MDD | IDL_CE     |
| MR Egger                  | 108 | -0.078013  | 0.0891073 | 0.3832841 | TwoSample_MR | MDD | IDL_CE_pct |
| Weighted median           | 108 | -0.0641769 | 0.024792  | 0.0096364 | TwoSample_MR | MDD | IDL_CE_pct |
| Inverse variance weighted | 108 | -0.0675203 | 0.0195448 | 0.000551  | TwoSample_MR | MDD | IDL_CE_pct |
| Simple mode               | 108 | -0.0865604 | 0.0744784 | 0.2477307 | TwoSample_MR | MDD | IDL_CE_pct |
| Weighted mode             | 108 | -0.0865604 | 0.082063  | 0.2938903 | TwoSample_MR | MDD | IDL_CE_pct |
| MR Egger                  | 108 | -0.096096  | 0.0972416 | 0.325296  | TwoSample_MR | MDD | IDL_C_pct  |
| Weighted median           | 108 | -0.0731037 | 0.0246137 | 0.0029776 | TwoSample_MR | MDD | IDL_C_pct  |
| Inverse variance weighted | 108 | -0.0884259 | 0.0213292 | 0.0000339 | TwoSample_MR | MDD | IDL_C_pct  |
| Simple mode               | 108 | -0.0780528 | 0.0748092 | 0.299134  | TwoSample_MR | MDD | IDL_C_pct  |
| Weighted mode             | 108 | -0.0812766 | 0.0703026 | 0.2502166 | TwoSample_MR | MDD | IDL_C_pct  |
| MR Egger                  | 108 | -0.0979512 | 0.0943394 | 0.3014999 | TwoSample_MR | MDD | IDL_FC     |
| Weighted median           | 108 | -0.086174  | 0.0249912 | 0.0005644 | TwoSample_MR | MDD | IDL_FC     |
| Inverse variance weighted | 108 | -0.0687456 | 0.0207011 | 0.0008974 | TwoSample_MR | MDD | IDL_FC     |
| Simple mode               | 108 | -0.1351555 | 0.072624  | 0.065485  | TwoSample_MR | MDD | IDL_FC     |
| Weighted mode             | 108 | -0.1316883 | 0.0685825 | 0.057502  | TwoSample_MR | MDD | IDL_FC     |
| MR Egger                  | 108 | -0.0394218 | 0.1099065 | 0.7205444 | TwoSample_MR | MDD | IDL_FC_pct |
| Weighted median           | 108 | -0.0841705 | 0.0258263 | 0.0011177 | TwoSample_MR | MDD | IDL_FC_pct |
| Inverse variance weighted | 108 | -0.0916572 | 0.0241313 | 0.0001457 | TwoSample_MR | MDD | IDL_FC_pct |
| Simple mode               | 108 | -0.1028821 | 0.075717  | 0.1770763 | TwoSample_MR | MDD | IDL_FC_pct |
| Weighted mode             | 108 | -0.0865288 | 0.0742616 | 0.2465336 | TwoSample_MR | MDD | IDL_FC_pct |
| MR Egger                  | 108 | -0.0909133 | 0.088515  | 0.306714  | TwoSample_MR | MDD | IDL_L      |
| Weighted median           | 108 | -0.0573279 | 0.0243301 | 0.0184604 | TwoSample_MR | MDD | IDL_L      |
| Inverse variance weighted | 108 | -0.0514176 | 0.0194329 | 0.0081471 | TwoSample_MR | MDD | IDL_L      |
| Simple mode               | 108 | -0.1160598 | 0.0722296 | 0.1110414 | TwoSample_MR | MDD | IDL_L      |
| Weighted mode             | 108 | -0.1099308 | 0.0700004 | 0.1192673 | TwoSample_MR | MDD | IDL_L      |
| MR Egger                  | 108 | 0.0120357  | 0.0855689 | 0.8884089 | TwoSample_MR | MDD | IDL_TG     |
| Weighted median           | 108 | 0.0561034  | 0.0247333 | 0.0233092 | TwoSample_MR | MDD | IDL_TG     |
| Inverse variance weighted | 108 | 0.0702384  | 0.0188108 | 0.0001885 | TwoSample_MR | MDD | IDL_TG     |
| Simple mode               | 108 | 0.0586139  | 0.0701398 | 0.405201  | TwoSample_MR | MDD | IDL_TG     |
| Weighted mode             | 108 | 0.0613588  | 0.0713622 | 0.3918094 | TwoSample_MR | MDD | IDL_TG     |
| MR Egger                  | 108 | 0.1138111  | 0.1004108 | 0.2595805 | TwoSample_MR | MDD | IDL_TG_pct |

|                           |     |            |           |           |              |     |              |
|---------------------------|-----|------------|-----------|-----------|--------------|-----|--------------|
| Weighted median           | 108 | 0.1207863  | 0.024937  | 0.0000013 | TwoSample_MR | MDD | IDL_TG_pct   |
| Inverse variance weighted | 108 | 0.1095837  | 0.0220248 | 0.0000007 | TwoSample_MR | MDD | IDL_TG_pct   |
| Simple mode               | 108 | 0.1404439  | 0.0633561 | 0.0287568 | TwoSample_MR | MDD | IDL_TG_pct   |
| Weighted mode             | 108 | 0.1404439  | 0.0628182 | 0.0274462 | TwoSample_MR | MDD | IDL_TG_pct   |
| MR Egger                  | 108 | 0.1545073  | 0.1382876 | 0.2663965 | TwoSample_MR | MDD | LA_pct       |
| Weighted median           | 108 | -0.0957583 | 0.023778  | 0.0000564 | TwoSample_MR | MDD | LA_pct       |
| Inverse variance weighted | 108 | -0.0772879 | 0.0307493 | 0.0119546 | TwoSample_MR | MDD | LA_pct       |
| Simple mode               | 108 | -0.1016282 | 0.0640287 | 0.1154114 | TwoSample_MR | MDD | LA_pct       |
| Weighted mode             | 108 | -0.1081691 | 0.0701199 | 0.1258728 | TwoSample_MR | MDD | LA_pct       |
| MR Egger                  | 108 | 0.1410849  | 0.0964643 | 0.1465462 | TwoSample_MR | MDD | L_HDL_C      |
| Weighted median           | 108 | -0.0435033 | 0.0233403 | 0.0623397 | TwoSample_MR | MDD | L_HDL_C      |
| Inverse variance weighted | 108 | -0.0863337 | 0.0217314 | 0.000071  | TwoSample_MR | MDD | L_HDL_C      |
| Simple mode               | 108 | -0.0168701 | 0.0740831 | 0.8202993 | TwoSample_MR | MDD | L_HDL_C      |
| Weighted mode             | 108 | -0.0135855 | 0.075415  | 0.857381  | TwoSample_MR | MDD | L_HDL_C      |
| MR Egger                  | 108 | 0.1443342  | 0.0968985 | 0.1393146 | TwoSample_MR | MDD | L_HDL_CE     |
| Weighted median           | 108 | -0.050163  | 0.0227944 | 0.0277592 | TwoSample_MR | MDD | L_HDL_CE     |
| Inverse variance weighted | 108 | -0.0880154 | 0.0218492 | 0.0000562 | TwoSample_MR | MDD | L_HDL_CE     |
| Simple mode               | 108 | -0.0239176 | 0.069866  | 0.7327695 | TwoSample_MR | MDD | L_HDL_CE     |
| Weighted mode             | 108 | -0.0239176 | 0.077263  | 0.7574966 | TwoSample_MR | MDD | L_HDL_CE     |
| MR Egger                  | 108 | 0.0515869  | 0.1033034 | 0.6185518 | TwoSample_MR | MDD | L_HDL_CE_pct |
| Weighted median           | 108 | -0.1071638 | 0.0253817 | 0.0000242 | TwoSample_MR | MDD | L_HDL_CE_pct |
| Inverse variance weighted | 108 | -0.1020077 | 0.0229052 | 0.0000084 | TwoSample_MR | MDD | L_HDL_CE_pct |
| Simple mode               | 108 | -0.1784611 | 0.0682303 | 0.0101941 | TwoSample_MR | MDD | L_HDL_CE_pct |
| Weighted mode             | 108 | -0.1467247 | 0.0591227 | 0.0146314 | TwoSample_MR | MDD | L_HDL_CE_pct |
| MR Egger                  | 108 | 0.041952   | 0.1059549 | 0.6929438 | TwoSample_MR | MDD | L_HDL_C_pct  |
| Weighted median           | 108 | -0.1159401 | 0.0251205 | 0.0000039 | TwoSample_MR | MDD | L_HDL_C_pct  |
| Inverse variance weighted | 108 | -0.1106657 | 0.0234781 | 0.0000024 | TwoSample_MR | MDD | L_HDL_C_pct  |
| Simple mode               | 108 | -0.1748162 | 0.0730761 | 0.0184894 | TwoSample_MR | MDD | L_HDL_C_pct  |
| Weighted mode             | 108 | -0.1588416 | 0.061951  | 0.0117355 | TwoSample_MR | MDD | L_HDL_C_pct  |
| MR Egger                  | 108 | 0.1285039  | 0.0946317 | 0.1773674 | TwoSample_MR | MDD | L_HDL_FC     |
| Weighted median           | 108 | -0.0352733 | 0.0227787 | 0.1214976 | TwoSample_MR | MDD | L_HDL_FC     |
| Inverse variance weighted | 108 | -0.0793562 | 0.0212444 | 0.0001874 | TwoSample_MR | MDD | L_HDL_FC     |
| Simple mode               | 108 | 0.0121276  | 0.0803056 | 0.8802463 | TwoSample_MR | MDD | L_HDL_FC     |
| Weighted mode             | 108 | 0.0152071  | 0.082698  | 0.8544502 | TwoSample_MR | MDD | L_HDL_FC     |
| MR Egger                  | 108 | -0.0544252 | 0.1013622 | 0.5924355 | TwoSample_MR | MDD | L_HDL_FC_pct |
| Weighted median           | 108 | -0.0923776 | 0.0236264 | 0.0000923 | TwoSample_MR | MDD | L_HDL_FC_pct |
| Inverse variance weighted | 108 | -0.1017455 | 0.0222548 | 0.0000048 | TwoSample_MR | MDD | L_HDL_FC_pct |
| Simple mode               | 108 | -0.0838145 | 0.0673745 | 0.2162143 | TwoSample_MR | MDD | L_HDL_FC_pct |
| Weighted mode             | 108 | -0.0995847 | 0.0666348 | 0.1379921 | TwoSample_MR | MDD | L_HDL_FC_pct |
| MR Egger                  | 108 | 0.1558268  | 0.0937306 | 0.0993676 | TwoSample_MR | MDD | L_HDL_L      |
| Weighted median           | 108 | -0.0113803 | 0.0231007 | 0.622267  | TwoSample_MR | MDD | L_HDL_L      |
| Inverse variance weighted | 108 | -0.0716527 | 0.0211479 | 0.0007036 | TwoSample_MR | MDD | L_HDL_L      |
| Simple mode               | 108 | 0.0252173  | 0.0778113 | 0.7465081 | TwoSample_MR | MDD | L_HDL_L      |
| Weighted mode             | 108 | 0.0282564  | 0.0788492 | 0.7207797 | TwoSample_MR | MDD | L_HDL_L      |
| MR Egger                  | 108 | 0.1465677  | 0.0955352 | 0.1279662 | TwoSample_MR | MDD | L_HDL_P      |
| Weighted median           | 108 | -0.0210933 | 0.0228583 | 0.35612   | TwoSample_MR | MDD | L_HDL_P      |
| Inverse variance weighted | 108 | -0.0750282 | 0.0215035 | 0.0004846 | TwoSample_MR | MDD | L_HDL_P      |
| Simple mode               | 108 | 0.0222688  | 0.0805927 | 0.7828411 | TwoSample_MR | MDD | L_HDL_P      |
| Weighted mode             | 108 | 0.0253913  | 0.0821908 | 0.7579749 | TwoSample_MR | MDD | L_HDL_P      |
| MR Egger                  | 108 | 0.1644614  | 0.0915849 | 0.0753873 | TwoSample_MR | MDD | L_HDL_PL     |
| Weighted median           | 108 | -0.0119261 | 0.0235147 | 0.6120322 | TwoSample_MR | MDD | L_HDL_PL     |
| Inverse variance weighted | 108 | -0.0622339 | 0.0206865 | 0.002626  | TwoSample_MR | MDD | L_HDL_PL     |
| Simple mode               | 108 | 0.0409936  | 0.0775018 | 0.5979438 | TwoSample_MR | MDD | L_HDL_PL     |
| Weighted mode             | 108 | 0.0439161  | 0.0826458 | 0.596259  | TwoSample_MR | MDD | L_HDL_PL     |
| MR Egger                  | 108 | 0.0007278  | 0.105004  | 0.994483  | TwoSample_MR | MDD | L_HDL_PL_pct |
| Weighted median           | 108 | 0.1123032  | 0.0251392 | 0.0000079 | TwoSample_MR | MDD | L_HDL_PL_pct |
| Inverse variance weighted | 108 | 0.1050653  | 0.023144  | 0.0000056 | TwoSample_MR | MDD | L_HDL_PL_pct |
| Simple mode               | 108 | 0.1263067  | 0.073794  | 0.0898651 | TwoSample_MR | MDD | L_HDL_PL_pct |
| Weighted mode             | 108 | 0.1403004  | 0.0606969 | 0.0227215 | TwoSample_MR | MDD | L_HDL_PL_pct |
| MR Egger                  | 108 | -0.0746732 | 0.0971104 | 0.4436322 | TwoSample_MR | MDD | L_HDL_TG_pct |
| Weighted median           | 108 | 0.0809663  | 0.0242452 | 0.0008394 | TwoSample_MR | MDD | L_HDL_TG_pct |
| Inverse variance weighted | 108 | 0.0936494  | 0.0216137 | 0.0000147 | TwoSample_MR | MDD | L_HDL_TG_pct |

|                           |     |            |           |           |              |     |               |
|---------------------------|-----|------------|-----------|-----------|--------------|-----|---------------|
| Simple mode               | 108 | 0.0500048  | 0.0669582 | 0.4568181 | TwoSample_MR | MDD | L_HDL_TG_pct  |
| Weighted mode             | 108 | 0.0647889  | 0.0565783 | 0.254715  | TwoSample_MR | MDD | L_HDL_TG_pct  |
| MR Egger                  | 108 | 0.1145354  | 0.0943719 | 0.2275748 | TwoSample_MR | MDD | L_LDL_TG_pct  |
| Weighted median           | 108 | 0.1080903  | 0.0249059 | 0.0000143 | TwoSample_MR | MDD | L_LDL_TG_pct  |
| Inverse variance weighted | 108 | 0.1013585  | 0.0207008 | 0.000001  | TwoSample_MR | MDD | L_LDL_TG_pct  |
| Simple mode               | 108 | 0.1260947  | 0.0628856 | 0.0474723 | TwoSample_MR | MDD | L_LDL_TG_pct  |
| Weighted mode             | 108 | 0.1229554  | 0.0539227 | 0.0245772 | TwoSample_MR | MDD | L_LDL_TG_pct  |
| MR Egger                  | 108 | -0.1227203 | 0.0875531 | 0.1639359 | TwoSample_MR | MDD | L_VLDL_C      |
| Weighted median           | 108 | 0.0435371  | 0.0244481 | 0.0749453 | TwoSample_MR | MDD | L_VLDL_C      |
| Inverse variance weighted | 108 | 0.0681648  | 0.019654  | 0.0005239 | TwoSample_MR | MDD | L_VLDL_C      |
| Simple mode               | 108 | 0.0556422  | 0.0635899 | 0.3835252 | TwoSample_MR | MDD | L_VLDL_C      |
| Weighted mode             | 108 | 0.0497386  | 0.0627523 | 0.4297544 | TwoSample_MR | MDD | L_VLDL_C      |
| MR Egger                  | 108 | -0.1265369 | 0.0850667 | 0.139851  | TwoSample_MR | MDD | L_VLDL_CE     |
| Weighted median           | 108 | 0.0307575  | 0.0240447 | 0.2008335 | TwoSample_MR | MDD | L_VLDL_CE     |
| Inverse variance weighted | 108 | 0.0513737  | 0.0190606 | 0.0070328 | TwoSample_MR | MDD | L_VLDL_CE     |
| Simple mode               | 108 | 0.0047159  | 0.0675466 | 0.9444696 | TwoSample_MR | MDD | L_VLDL_CE     |
| Weighted mode             | 108 | -0.0006985 | 0.0650572 | 0.991454  | TwoSample_MR | MDD | L_VLDL_CE     |
| MR Egger                  | 108 | 0.0465489  | 0.0979284 | 0.6355258 | TwoSample_MR | MDD | L_VLDL_CE_pct |
| Weighted median           | 108 | -0.1139866 | 0.0244245 | 0.0000031 | TwoSample_MR | MDD | L_VLDL_CE_pct |
| Inverse variance weighted | 108 | -0.0944112 | 0.0217034 | 0.0000136 | TwoSample_MR | MDD | L_VLDL_CE_pct |
| Simple mode               | 108 | -0.1181823 | 0.0623581 | 0.060762  | TwoSample_MR | MDD | L_VLDL_CE_pct |
| Weighted mode             | 108 | -0.1212848 | 0.0584876 | 0.0405097 | TwoSample_MR | MDD | L_VLDL_CE_pct |
| MR Egger                  | 108 | -0.1182685 | 0.0905663 | 0.1944209 | TwoSample_MR | MDD | L_VLDL_FC     |
| Weighted median           | 108 | 0.0536379  | 0.0248893 | 0.0311572 | TwoSample_MR | MDD | L_VLDL_FC     |
| Inverse variance weighted | 108 | 0.0813884  | 0.0203417 | 0.0000631 | TwoSample_MR | MDD | L_VLDL_FC     |
| Simple mode               | 108 | 0.0741148  | 0.0699319 | 0.2916154 | TwoSample_MR | MDD | L_VLDL_FC     |
| Weighted mode             | 108 | 0.0678387  | 0.0648711 | 0.2980351 | TwoSample_MR | MDD | L_VLDL_FC     |
| MR Egger                  | 108 | -0.1234773 | 0.0919666 | 0.1822591 | TwoSample_MR | MDD | L_VLDL_L      |
| Weighted median           | 108 | 0.0651641  | 0.0234916 | 0.0055384 | TwoSample_MR | MDD | L_VLDL_L      |
| Inverse variance weighted | 108 | 0.0832398  | 0.0206756 | 0.0000567 | TwoSample_MR | MDD | L_VLDL_L      |
| Simple mode               | 108 | 0.0817419  | 0.065952  | 0.217903  | TwoSample_MR | MDD | L_VLDL_L      |
| Weighted mode             | 108 | 0.0724768  | 0.0638901 | 0.2591623 | TwoSample_MR | MDD | L_VLDL_L      |
| MR Egger                  | 108 | -0.1092083 | 0.0917915 | 0.2368054 | TwoSample_MR | MDD | L_VLDL_P      |
| Weighted median           | 108 | 0.06391    | 0.0240758 | 0.0079417 | TwoSample_MR | MDD | L_VLDL_P      |
| Inverse variance weighted | 108 | 0.0856809  | 0.0205831 | 0.0000315 | TwoSample_MR | MDD | L_VLDL_P      |
| Simple mode               | 108 | 0.0749635  | 0.0672712 | 0.2676268 | TwoSample_MR | MDD | L_VLDL_P      |
| Weighted mode             | 108 | 0.0687351  | 0.069396  | 0.3241758 | TwoSample_MR | MDD | L_VLDL_P      |
| MR Egger                  | 108 | -0.1126758 | 0.0928903 | 0.2278267 | TwoSample_MR | MDD | L_VLDL_PL     |
| Weighted median           | 108 | 0.0706091  | 0.0237978 | 0.0030068 | TwoSample_MR | MDD | L_VLDL_PL     |
| Inverse variance weighted | 108 | 0.0876494  | 0.0208434 | 0.0000261 | TwoSample_MR | MDD | L_VLDL_PL     |
| Simple mode               | 108 | 0.0800075  | 0.0648767 | 0.2201944 | TwoSample_MR | MDD | L_VLDL_PL     |
| Weighted mode             | 108 | 0.0800075  | 0.0632333 | 0.2085213 | TwoSample_MR | MDD | L_VLDL_PL     |
| MR Egger                  | 108 | -0.0381771 | 0.0947581 | 0.6878406 | TwoSample_MR | MDD | L_VLDL_PL_pct |
| Weighted median           | 108 | 0.0654189  | 0.0242023 | 0.0068715 | TwoSample_MR | MDD | L_VLDL_PL_pct |
| Inverse variance weighted | 108 | 0.0806011  | 0.020945  | 0.000119  | TwoSample_MR | MDD | L_VLDL_PL_pct |
| Simple mode               | 108 | 0.0364949  | 0.0676986 | 0.5909526 | TwoSample_MR | MDD | L_VLDL_PL_pct |
| Weighted mode             | 108 | 0.0426041  | 0.0684169 | 0.5347984 | TwoSample_MR | MDD | L_VLDL_PL_pct |
| MR Egger                  | 108 | -0.1293194 | 0.0930533 | 0.1675215 | TwoSample_MR | MDD | L_VLDL_TG     |
| Weighted median           | 108 | 0.0605391  | 0.0232529 | 0.0092277 | TwoSample_MR | MDD | L_VLDL_TG     |
| Inverse variance weighted | 108 | 0.0864613  | 0.0209528 | 0.0000368 | TwoSample_MR | MDD | L_VLDL_TG     |
| Simple mode               | 108 | 0.0887755  | 0.0675313 | 0.1914608 | TwoSample_MR | MDD | L_VLDL_TG     |
| Weighted mode             | 108 | 0.0764212  | 0.0639551 | 0.2347601 | TwoSample_MR | MDD | L_VLDL_TG     |
| MR Egger                  | 108 | 0.1881659  | 0.090788  | 0.0406366 | TwoSample_MR | MDD | M_HDL_C       |
| Weighted median           | 108 | -0.0196553 | 0.0239132 | 0.4111097 | TwoSample_MR | MDD | M_HDL_C       |
| Inverse variance weighted | 108 | -0.0169035 | 0.0204084 | 0.4075201 | TwoSample_MR | MDD | M_HDL_C       |
| Simple mode               | 108 | -0.0026508 | 0.0738528 | 0.9714349 | TwoSample_MR | MDD | M_HDL_C       |
| Weighted mode             | 108 | 0.0063829  | 0.0691615 | 0.9266408 | TwoSample_MR | MDD | M_HDL_C       |
| MR Egger                  | 108 | 0.1909571  | 0.0904527 | 0.0371127 | TwoSample_MR | MDD | M_HDL_CE      |
| Weighted median           | 108 | -0.0253394 | 0.022908  | 0.2686678 | TwoSample_MR | MDD | M_HDL_CE      |
| Inverse variance weighted | 108 | -0.0172107 | 0.0203518 | 0.3977422 | TwoSample_MR | MDD | M_HDL_CE      |
| Simple mode               | 108 | -0.0559723 | 0.0712821 | 0.4340579 | TwoSample_MR | MDD | M_HDL_CE      |
| Weighted mode             | 108 | -0.0438774 | 0.0716685 | 0.5416866 | TwoSample_MR | MDD | M_HDL_CE      |

|                           |     |            |           |           |              |     |               |
|---------------------------|-----|------------|-----------|-----------|--------------|-----|---------------|
| MR Egger                  | 108 | 0.0749979  | 0.0985669 | 0.4484164 | TwoSample_MR | MDD | M_HDL_CE_pct  |
| Weighted median           | 108 | -0.0771762 | 0.025148  | 0.0021487 | TwoSample_MR | MDD | M_HDL_CE_pct  |
| Inverse variance weighted | 108 | -0.0748195 | 0.0218655 | 0.0006221 | TwoSample_MR | MDD | M_HDL_CE_pct  |
| Simple mode               | 108 | -0.1372911 | 0.0723485 | 0.0604394 | TwoSample_MR | MDD | M_HDL_CE_pct  |
| Weighted mode             | 108 | -0.1300355 | 0.0697604 | 0.0650586 | TwoSample_MR | MDD | M_HDL_CE_pct  |
| MR Egger                  | 108 | 0.085855   | 0.1008401 | 0.3964681 | TwoSample_MR | MDD | M_HDL_C_pct   |
| Weighted median           | 108 | -0.0673699 | 0.0238899 | 0.0048022 | TwoSample_MR | MDD | M_HDL_C_pct   |
| Inverse variance weighted | 108 | -0.082856  | 0.0224232 | 0.0002198 | TwoSample_MR | MDD | M_HDL_C_pct   |
| Simple mode               | 108 | -0.1619271 | 0.0745709 | 0.032106  | TwoSample_MR | MDD | M_HDL_C_pct   |
| Weighted mode             | 108 | -0.1367961 | 0.0650553 | 0.0378315 | TwoSample_MR | MDD | M_HDL_C_pct   |
| MR Egger                  | 108 | 0.1734277  | 0.0915816 | 0.0609918 | TwoSample_MR | MDD | M_HDL_FC      |
| Weighted median           | 108 | -0.0036625 | 0.0233461 | 0.8753404 | TwoSample_MR | MDD | M_HDL_FC      |
| Inverse variance weighted | 108 | -0.015694  | 0.0205048 | 0.444046  | TwoSample_MR | MDD | M_HDL_FC      |
| Simple mode               | 108 | 0.0483581  | 0.0741906 | 0.5159219 | TwoSample_MR | MDD | M_HDL_FC      |
| Weighted mode             | 108 | 0.0513748  | 0.0747136 | 0.4931781 | TwoSample_MR | MDD | M_HDL_FC      |
| MR Egger                  | 108 | 0.0863751  | 0.0988655 | 0.3842769 | TwoSample_MR | MDD | M_HDL_FC_pct  |
| Weighted median           | 108 | -0.0406672 | 0.0229151 | 0.0759497 | TwoSample_MR | MDD | M_HDL_FC_pct  |
| Inverse variance weighted | 108 | -0.0688896 | 0.0219462 | 0.0016951 | TwoSample_MR | MDD | M_HDL_FC_pct  |
| Simple mode               | 108 | -0.0339502 | 0.0755006 | 0.6538597 | TwoSample_MR | MDD | M_HDL_FC_pct  |
| Weighted mode             | 108 | -0.0270182 | 0.0720793 | 0.7085213 | TwoSample_MR | MDD | M_HDL_FC_pct  |
| MR Egger                  | 108 | 0.1873088  | 0.0914509 | 0.0430128 | TwoSample_MR | MDD | M_HDL_P       |
| Weighted median           | 108 | 0.004825   | 0.0233695 | 0.8364274 | TwoSample_MR | MDD | M_HDL_P       |
| Inverse variance weighted | 108 | -0.0048295 | 0.0204904 | 0.8136687 | TwoSample_MR | MDD | M_HDL_P       |
| Simple mode               | 108 | 0.0704548  | 0.0752707 | 0.3513716 | TwoSample_MR | MDD | M_HDL_P       |
| Weighted mode             | 108 | 0.0704548  | 0.0757175 | 0.3542096 | TwoSample_MR | MDD | M_HDL_P       |
| MR Egger                  | 108 | -0.0893854 | 0.1027949 | 0.3865108 | TwoSample_MR | MDD | M_HDL_PL_pct  |
| Weighted median           | 108 | 0.0721815  | 0.0241125 | 0.0027577 | TwoSample_MR | MDD | M_HDL_PL_pct  |
| Inverse variance weighted | 108 | 0.0787633  | 0.0228444 | 0.0005651 | TwoSample_MR | MDD | M_HDL_PL_pct  |
| Simple mode               | 108 | 0.063235   | 0.0703901 | 0.3710154 | TwoSample_MR | MDD | M_HDL_PL_pct  |
| Weighted mode             | 108 | 0.0414411  | 0.0622148 | 0.5067833 | TwoSample_MR | MDD | M_HDL_PL_pct  |
| MR Egger                  | 108 | 0.0575156  | 0.1034937 | 0.5795595 | TwoSample_MR | MDD | M_HDL_TG      |
| Weighted median           | 108 | 0.0854352  | 0.0259983 | 0.0010155 | TwoSample_MR | MDD | M_HDL_TG      |
| Inverse variance weighted | 108 | 0.0863929  | 0.0227083 | 0.0001421 | TwoSample_MR | MDD | M_HDL_TG      |
| Simple mode               | 108 | 0.1305428  | 0.08081   | 0.1091626 | TwoSample_MR | MDD | M_HDL_TG      |
| Weighted mode             | 108 | 0.1242661  | 0.0788259 | 0.1178712 | TwoSample_MR | MDD | M_HDL_TG      |
| MR Egger                  | 108 | -0.0698796 | 0.0973938 | 0.4746467 | TwoSample_MR | MDD | M_HDL_TG_pct  |
| Weighted median           | 108 | 0.0839568  | 0.0253043 | 0.000907  | TwoSample_MR | MDD | M_HDL_TG_pct  |
| Inverse variance weighted | 108 | 0.0815401  | 0.0216162 | 0.0001618 | TwoSample_MR | MDD | M_HDL_TG_pct  |
| Simple mode               | 108 | 0.139983   | 0.0693724 | 0.0461099 | TwoSample_MR | MDD | M_HDL_TG_pct  |
| Weighted mode             | 108 | 0.1331371  | 0.0679042 | 0.0525181 | TwoSample_MR | MDD | M_HDL_TG_pct  |
| MR Egger                  | 108 | -0.0107243 | 0.0870141 | 0.9021438 | TwoSample_MR | MDD | M_LDL_TG      |
| Weighted median           | 108 | 0.0777509  | 0.0250126 | 0.0018806 | TwoSample_MR | MDD | M_LDL_TG      |
| Inverse variance weighted | 108 | 0.0869823  | 0.0192062 | 0.0000059 | TwoSample_MR | MDD | M_LDL_TG      |
| Simple mode               | 108 | 0.0737938  | 0.0720257 | 0.307887  | TwoSample_MR | MDD | M_LDL_TG      |
| Weighted mode             | 108 | 0.0620622  | 0.0693323 | 0.3727206 | TwoSample_MR | MDD | M_LDL_TG      |
| MR Egger                  | 108 | 0.1536468  | 0.093331  | 0.1026728 | TwoSample_MR | MDD | M_LDL_TG_pct  |
| Weighted median           | 108 | 0.1019543  | 0.0243846 | 0.000029  | TwoSample_MR | MDD | M_LDL_TG_pct  |
| Inverse variance weighted | 108 | 0.0950515  | 0.0205103 | 0.0000036 | TwoSample_MR | MDD | M_LDL_TG_pct  |
| Simple mode               | 108 | 0.1058199  | 0.0666779 | 0.1154564 | TwoSample_MR | MDD | M_LDL_TG_pct  |
| Weighted mode             | 108 | 0.1028082  | 0.0616449 | 0.09829   | TwoSample_MR | MDD | M_LDL_TG_pct  |
| MR Egger                  | 108 | 0.0168086  | 0.1001315 | 0.8670089 | TwoSample_MR | MDD | MUFA          |
| Weighted median           | 108 | 0.0984043  | 0.0251163 | 0.0000893 | TwoSample_MR | MDD | MUFA          |
| Inverse variance weighted | 108 | 0.1058278  | 0.022052  | 0.0000016 | TwoSample_MR | MDD | MUFA          |
| Simple mode               | 108 | 0.1148532  | 0.0811735 | 0.1599984 | TwoSample_MR | MDD | MUFA          |
| Weighted mode             | 108 | 0.1117892  | 0.0772001 | 0.1505286 | TwoSample_MR | MDD | MUFA          |
| MR Egger                  | 108 | 0.0307271  | 0.1297817 | 0.8133001 | TwoSample_MR | MDD | MUFA_pct      |
| Weighted median           | 108 | 0.1156114  | 0.0250831 | 0.000004  | TwoSample_MR | MDD | MUFA_pct      |
| Inverse variance weighted | 108 | 0.1451301  | 0.028578  | 0.0000004 | TwoSample_MR | MDD | MUFA_pct      |
| Simple mode               | 108 | 0.1492265  | 0.0693612 | 0.0336909 | TwoSample_MR | MDD | MUFA_pct      |
| Weighted mode             | 108 | 0.1159106  | 0.0744271 | 0.1223356 | TwoSample_MR | MDD | MUFA_pct      |
| MR Egger                  | 108 | -0.0131421 | 0.1043882 | 0.9000523 | TwoSample_MR | MDD | M_VLDL_CE_pct |
| Weighted median           | 108 | -0.1033709 | 0.0237005 | 0.0000129 | TwoSample_MR | MDD | M_VLDL_CE_pct |



|                           |     |            |           |           |              |     |               |
|---------------------------|-----|------------|-----------|-----------|--------------|-----|---------------|
| Inverse variance weighted | 108 | -0.1090868 | 0.0229949 | 0.0000021 | TwoSample_MR | MDD | M_VLDL_CE_pct |
| Simple mode               | 108 | -0.1140899 | 0.0597673 | 0.0589541 | TwoSample_MR | MDD | M_VLDL_CE_pct |
| Weighted mode             | 108 | -0.1209549 | 0.0525263 | 0.0232274 | TwoSample_MR | MDD | M_VLDL_CE_pct |
| MR Egger                  | 108 | -0.0244469 | 0.1047959 | 0.8159927 | TwoSample_MR | MDD | M_VLDL_C_pct  |
| Weighted median           | 108 | -0.1127586 | 0.0238814 | 0.0000023 | TwoSample_MR | MDD | M_VLDL_C_pct  |
| Inverse variance weighted | 108 | -0.1090252 | 0.0230624 | 0.0000023 | TwoSample_MR | MDD | M_VLDL_C_pct  |
| Simple mode               | 108 | -0.1218218 | 0.0644426 | 0.0614111 | TwoSample_MR | MDD | M_VLDL_C_pct  |
| Weighted mode             | 108 | -0.1285208 | 0.0543099 | 0.0197592 | TwoSample_MR | MDD | M_VLDL_C_pct  |
| MR Egger                  | 108 | -0.0525862 | 0.1049803 | 0.6174696 | TwoSample_MR | MDD | M_VLDL_FC_pct |
| Weighted median           | 108 | -0.103706  | 0.0244395 | 0.000022  | TwoSample_MR | MDD | M_VLDL_FC_pct |
| Inverse variance weighted | 108 | -0.1041035 | 0.0230546 | 0.0000063 | TwoSample_MR | MDD | M_VLDL_FC_pct |
| Simple mode               | 108 | -0.1033556 | 0.0649612 | 0.1145516 | TwoSample_MR | MDD | M_VLDL_FC_pct |
| Weighted mode             | 108 | -0.1105225 | 0.0547139 | 0.0458812 | TwoSample_MR | MDD | M_VLDL_FC_pct |
| MR Egger                  | 108 | -0.1246501 | 0.0833473 | 0.137742  | TwoSample_MR | MDD | M_VLDL_L      |
| Weighted median           | 108 | 0.0325507  | 0.0238738 | 0.1727401 | TwoSample_MR | MDD | M_VLDL_L      |
| Inverse variance weighted | 108 | 0.0439476  | 0.0186503 | 0.0184532 | TwoSample_MR | MDD | M_VLDL_L      |
| Simple mode               | 108 | 0.0195537  | 0.0691544 | 0.7779114 | TwoSample_MR | MDD | M_VLDL_L      |
| Weighted mode             | 108 | 0.0170744  | 0.0643851 | 0.7913723 | TwoSample_MR | MDD | M_VLDL_L      |
| MR Egger                  | 108 | -0.0930682 | 0.0915826 | 0.3118379 | TwoSample_MR | MDD | M_VLDL_TG     |
| Weighted median           | 108 | 0.0547751  | 0.0246014 | 0.0259806 | TwoSample_MR | MDD | M_VLDL_TG     |
| Inverse variance weighted | 108 | 0.0825865  | 0.0204545 | 0.000054  | TwoSample_MR | MDD | M_VLDL_TG     |
| Simple mode               | 108 | 0.0440557  | 0.0684974 | 0.5214874 | TwoSample_MR | MDD | M_VLDL_TG     |
| Weighted mode             | 108 | 0.0348506  | 0.0625724 | 0.5787152 | TwoSample_MR | MDD | M_VLDL_TG     |
| MR Egger                  | 108 | 0.0344883  | 0.1036421 | 0.7399702 | TwoSample_MR | MDD | M_VLDL_TG_pct |
| Weighted median           | 108 | 0.1120856  | 0.024167  | 0.0000035 | TwoSample_MR | MDD | M_VLDL_TG_pct |
| Inverse variance weighted | 108 | 0.1059606  | 0.022788  | 0.0000033 | TwoSample_MR | MDD | M_VLDL_TG_pct |
| Simple mode               | 108 | 0.1171951  | 0.0568911 | 0.0418262 | TwoSample_MR | MDD | M_VLDL_TG_pct |
| Weighted mode             | 108 | 0.1237836  | 0.0538859 | 0.023557  | TwoSample_MR | MDD | M_VLDL_TG_pct |
| MR Egger                  | 108 | 0.0714435  | 0.0997078 | 0.4752407 | TwoSample_MR | MDD | Omega_6_pct   |
| Weighted median           | 108 | -0.0810268 | 0.0247871 | 0.0010796 | TwoSample_MR | MDD | Omega_6_pct   |
| Inverse variance weighted | 108 | -0.1008933 | 0.022193  | 0.0000055 | TwoSample_MR | MDD | Omega_6_pct   |
| Simple mode               | 108 | -0.0803998 | 0.064071  | 0.2122656 | TwoSample_MR | MDD | Omega_6_pct   |
| Weighted mode             | 108 | -0.0803998 | 0.0649831 | 0.2187058 | TwoSample_MR | MDD | Omega_6_pct   |
| MR Egger                  | 108 | 0.0152848  | 0.1236368 | 0.9018453 | TwoSample_MR | MDD | PUFA_by_MUFA  |
| Weighted median           | 108 | -0.1206485 | 0.0248057 | 0.0000012 | TwoSample_MR | MDD | PUFA_by_MUFA  |
| Inverse variance weighted | 108 | -0.1359765 | 0.0273214 | 0.0000006 | TwoSample_MR | MDD | PUFA_by_MUFA  |
| Simple mode               | 108 | -0.1566297 | 0.0740667 | 0.0367768 | TwoSample_MR | MDD | PUFA_by_MUFA  |
| Weighted mode             | 108 | -0.146574  | 0.0714334 | 0.042621  | TwoSample_MR | MDD | PUFA_by_MUFA  |
| MR Egger                  | 108 | 0.0784115  | 0.1126044 | 0.4877373 | TwoSample_MR | MDD | PUFA_pct      |
| Weighted median           | 108 | -0.0877099 | 0.0259054 | 0.0007098 | TwoSample_MR | MDD | PUFA_pct      |
| Inverse variance weighted | 108 | -0.1142222 | 0.0250558 | 0.0000051 | TwoSample_MR | MDD | PUFA_pct      |
| Simple mode               | 108 | -0.1247905 | 0.0754478 | 0.1010588 | TwoSample_MR | MDD | PUFA_pct      |
| Weighted mode             | 108 | -0.1016634 | 0.0714972 | 0.1579576 | TwoSample_MR | MDD | PUFA_pct      |
| MR Egger                  | 108 | 0.0531089  | 0.0801549 | 0.5090386 | TwoSample_MR | MDD | Pyruvate      |
| Weighted median           | 108 | 0.0293892  | 0.0250656 | 0.2409997 | TwoSample_MR | MDD | Pyruvate      |
| Inverse variance weighted | 108 | 0.0298772  | 0.0175862 | 0.0893376 | TwoSample_MR | MDD | Pyruvate      |
| Simple mode               | 108 | 0.005308   | 0.0703141 | 0.9399662 | TwoSample_MR | MDD | Pyruvate      |
| Weighted mode             | 108 | 0.0178188  | 0.0704937 | 0.8009296 | TwoSample_MR | MDD | Pyruvate      |
| MR Egger                  | 108 | -0.0518511 | 0.0972319 | 0.5949614 | TwoSample_MR | MDD | S_HDL_C_pct   |
| Weighted median           | 108 | -0.0806612 | 0.0255207 | 0.0015743 | TwoSample_MR | MDD | S_HDL_C_pct   |
| Inverse variance weighted | 108 | -0.0731061 | 0.0213308 | 0.0006097 | TwoSample_MR | MDD | S_HDL_C_pct   |
| Simple mode               | 108 | -0.0930532 | 0.0772158 | 0.2308211 | TwoSample_MR | MDD | S_HDL_C_pct   |
| Weighted mode             | 108 | -0.096331  | 0.0780051 | 0.2195604 | TwoSample_MR | MDD | S_HDL_C_pct   |
| MR Egger                  | 108 | 0.0038405  | 0.096705  | 0.9683959 | TwoSample_MR | MDD | S_HDL_FC_pct  |
| Weighted median           | 108 | -0.0645623 | 0.0234731 | 0.0059508 | TwoSample_MR | MDD | S_HDL_FC_pct  |
| Inverse variance weighted | 108 | -0.0678958 | 0.021267  | 0.0014102 | TwoSample_MR | MDD | S_HDL_FC_pct  |
| Simple mode               | 108 | -0.0871921 | 0.0677903 | 0.201148  | TwoSample_MR | MDD | S_HDL_FC_pct  |
| Weighted mode             | 108 | -0.0871921 | 0.060875  | 0.1549687 | TwoSample_MR | MDD | S_HDL_FC_pct  |
| MR Egger                  | 108 | -0.0122485 | 0.1044066 | 0.9068324 | TwoSample_MR | MDD | S_HDL_TG      |
| Weighted median           | 108 | 0.0974063  | 0.026381  | 0.0002222 | TwoSample_MR | MDD | S_HDL_TG      |
| Inverse variance weighted | 108 | 0.1083879  | 0.0230536 | 0.0000026 | TwoSample_MR | MDD | S_HDL_TG      |
| Simple mode               | 108 | 0.1743372  | 0.0840084 | 0.0403628 | TwoSample_MR | MDD | S_HDL_TG      |

|                           |     |            |           |           |              |     |                |
|---------------------------|-----|------------|-----------|-----------|--------------|-----|----------------|
| Weighted mode             | 108 | 0.1534657  | 0.0842359 | 0.0712703 | TwoSample_MR | MDD | S_HDL_TG       |
| MR Egger                  | 108 | -0.0569276 | 0.0964989 | 0.5564928 | TwoSample_MR | MDD | S_HDL_TG_pct   |
| Weighted median           | 108 | 0.1054354  | 0.0238596 | 0.0000099 | TwoSample_MR | MDD | S_HDL_TG_pct   |
| Inverse variance weighted | 108 | 0.0901884  | 0.0214091 | 0.0000252 | TwoSample_MR | MDD | S_HDL_TG_pct   |
| Simple mode               | 108 | 0.1295313  | 0.06991   | 0.0666625 | TwoSample_MR | MDD | S_HDL_TG_pct   |
| Weighted mode             | 108 | 0.1295313  | 0.0620763 | 0.0392964 | TwoSample_MR | MDD | S_HDL_TG_pct   |
| MR Egger                  | 108 | -0.0591222 | 0.0992667 | 0.5527193 | TwoSample_MR | MDD | S_LDL_PL_pct   |
| Weighted median           | 108 | -0.0632553 | 0.0251198 | 0.0117976 | TwoSample_MR | MDD | S_LDL_PL_pct   |
| Inverse variance weighted | 108 | -0.0705468 | 0.0217752 | 0.0011962 | TwoSample_MR | MDD | S_LDL_PL_pct   |
| Simple mode               | 108 | -0.0950822 | 0.0799242 | 0.2368153 | TwoSample_MR | MDD | S_LDL_PL_pct   |
| Weighted mode             | 108 | -0.0856519 | 0.0808879 | 0.2920317 | TwoSample_MR | MDD | S_LDL_PL_pct   |
| MR Egger                  | 108 | -0.0235492 | 0.0910571 | 0.7964299 | TwoSample_MR | MDD | S_LDL_TG       |
| Weighted median           | 108 | 0.0835167  | 0.0247833 | 0.000752  | TwoSample_MR | MDD | S_LDL_TG       |
| Inverse variance weighted | 108 | 0.0933573  | 0.0201398 | 0.0000036 | TwoSample_MR | MDD | S_LDL_TG       |
| Simple mode               | 108 | 0.0909734  | 0.0757482 | 0.2324044 | TwoSample_MR | MDD | S_LDL_TG       |
| Weighted mode             | 108 | 0.0848164  | 0.0748969 | 0.2599799 | TwoSample_MR | MDD | S_LDL_TG       |
| MR Egger                  | 108 | 0.1121516  | 0.1029963 | 0.2786719 | TwoSample_MR | MDD | S_LDL_TG_pct   |
| Weighted median           | 108 | 0.1172553  | 0.0252716 | 0.0000035 | TwoSample_MR | MDD | S_LDL_TG_pct   |
| Inverse variance weighted | 108 | 0.1111269  | 0.022595  | 0.0000009 | TwoSample_MR | MDD | S_LDL_TG_pct   |
| Simple mode               | 108 | 0.1406928  | 0.06535   | 0.033572  | TwoSample_MR | MDD | S_LDL_TG_pct   |
| Weighted mode             | 108 | 0.1406928  | 0.0624199 | 0.0262356 | TwoSample_MR | MDD | S_LDL_TG_pct   |
| MR Egger                  | 108 | -0.1325769 | 0.09821   | 0.1799132 | TwoSample_MR | MDD | S_VLDL_C_pct   |
| Weighted median           | 108 | -0.1161921 | 0.0236767 | 0.0000009 | TwoSample_MR | MDD | S_VLDL_C_pct   |
| Inverse variance weighted | 108 | -0.0962925 | 0.0215567 | 0.0000079 | TwoSample_MR | MDD | S_VLDL_C_pct   |
| Simple mode               | 108 | -0.116706  | 0.0641988 | 0.0718797 | TwoSample_MR | MDD | S_VLDL_C_pct   |
| Weighted mode             | 108 | -0.1321955 | 0.0554334 | 0.01885   | TwoSample_MR | MDD | S_VLDL_C_pct   |
| MR Egger                  | 108 | -0.0969671 | 0.1043085 | 0.3546809 | TwoSample_MR | MDD | S_VLDL_FC_pct  |
| Weighted median           | 108 | -0.1237079 | 0.0233128 | 0.0000001 | TwoSample_MR | MDD | S_VLDL_FC_pct  |
| Inverse variance weighted | 108 | -0.1046791 | 0.0228809 | 0.0000048 | TwoSample_MR | MDD | S_VLDL_FC_pct  |
| Simple mode               | 108 | -0.1438262 | 0.0646844 | 0.0282834 | TwoSample_MR | MDD | S_VLDL_FC_pct  |
| Weighted mode             | 108 | -0.1405416 | 0.0570458 | 0.0153458 | TwoSample_MR | MDD | S_VLDL_FC_pct  |
| MR Egger                  | 108 | -0.0827061 | 0.0848566 | 0.3319488 | TwoSample_MR | MDD | S_VLDL_L       |
| Weighted median           | 108 | 0.0377801  | 0.0247268 | 0.126537  | TwoSample_MR | MDD | S_VLDL_L       |
| Inverse variance weighted | 108 | 0.0573384  | 0.0188636 | 0.0023686 | TwoSample_MR | MDD | S_VLDL_L       |
| Simple mode               | 108 | 0.0272315  | 0.0678233 | 0.688848  | TwoSample_MR | MDD | S_VLDL_L       |
| Weighted mode             | 108 | 0.0189435  | 0.073028  | 0.7958248 | TwoSample_MR | MDD | S_VLDL_L       |
| MR Egger                  | 108 | -0.0811725 | 0.0844834 | 0.3388338 | TwoSample_MR | MDD | S_VLDL_P       |
| Weighted median           | 108 | 0.042411   | 0.0241214 | 0.0787081 | TwoSample_MR | MDD | S_VLDL_P       |
| Inverse variance weighted | 108 | 0.0608646  | 0.01879   | 0.0011987 | TwoSample_MR | MDD | S_VLDL_P       |
| Simple mode               | 108 | 0.0217626  | 0.0671997 | 0.7466841 | TwoSample_MR | MDD | S_VLDL_P       |
| Weighted mode             | 108 | 0.010679   | 0.0665357 | 0.87279   | TwoSample_MR | MDD | S_VLDL_P       |
| MR Egger                  | 108 | -0.0945186 | 0.1029487 | 0.3606438 | TwoSample_MR | MDD | S_VLDL_PL_pct  |
| Weighted median           | 108 | -0.1205443 | 0.0246074 | 0.000001  | TwoSample_MR | MDD | S_VLDL_PL_pct  |
| Inverse variance weighted | 108 | -0.1013302 | 0.0225823 | 0.0000072 | TwoSample_MR | MDD | S_VLDL_PL_pct  |
| Simple mode               | 108 | -0.1381097 | 0.0620833 | 0.0282083 | TwoSample_MR | MDD | S_VLDL_PL_pct  |
| Weighted mode             | 108 | -0.1381097 | 0.0572754 | 0.0175979 | TwoSample_MR | MDD | S_VLDL_PL_pct  |
| MR Egger                  | 108 | -0.0109853 | 0.0947317 | 0.907902  | TwoSample_MR | MDD | S_VLDL_TG      |
| Weighted median           | 108 | 0.0632181  | 0.0252607 | 0.0123275 | TwoSample_MR | MDD | S_VLDL_TG      |
| Inverse variance weighted | 108 | 0.0942995  | 0.0209085 | 0.0000065 | TwoSample_MR | MDD | S_VLDL_TG      |
| Simple mode               | 108 | 0.0606293  | 0.0734189 | 0.4107555 | TwoSample_MR | MDD | S_VLDL_TG      |
| Weighted mode             | 108 | 0.0447095  | 0.0730159 | 0.5416214 | TwoSample_MR | MDD | S_VLDL_TG      |
| MR Egger                  | 108 | 0.1228652  | 0.0999325 | 0.2216132 | TwoSample_MR | MDD | S_VLDL_TG_pct  |
| Weighted median           | 108 | 0.1126045  | 0.0242182 | 0.0000033 | TwoSample_MR | MDD | S_VLDL_TG_pct  |
| Inverse variance weighted | 108 | 0.0994497  | 0.0219262 | 0.0000057 | TwoSample_MR | MDD | S_VLDL_TG_pct  |
| Simple mode               | 108 | 0.1215705  | 0.0602978 | 0.0462882 | TwoSample_MR | MDD | S_VLDL_TG_pct  |
| Weighted mode             | 108 | 0.1308776  | 0.054461  | 0.0179755 | TwoSample_MR | MDD | S_VLDL_TG_pct  |
| MR Egger                  | 108 | -0.0301046 | 0.0972402 | 0.7574805 | TwoSample_MR | MDD | Sphingomyelins |
| Weighted median           | 108 | -0.0215488 | 0.0239087 | 0.3674317 | TwoSample_MR | MDD | Sphingomyelins |
| Inverse variance weighted | 108 | -0.0391216 | 0.0213279 | 0.0666114 | TwoSample_MR | MDD | Sphingomyelins |
| Simple mode               | 108 | -0.0392064 | 0.064211  | 0.542768  | TwoSample_MR | MDD | Sphingomyelins |
| Weighted mode             | 108 | -0.0352774 | 0.0650357 | 0.5886494 | TwoSample_MR | MDD | Sphingomyelins |
| MR Egger                  | 108 | -0.1098953 | 0.0949893 | 0.2499041 | TwoSample_MR | MDD | TG_by_PG       |

|                           |     |            |           |           |              |     |              |
|---------------------------|-----|------------|-----------|-----------|--------------|-----|--------------|
| Weighted median           | 108 | 0.0872591  | 0.0235867 | 0.000216  | TwoSample_MR | MDD | TG_by_PG     |
| Inverse variance weighted | 108 | 0.0967149  | 0.0213234 | 0.0000057 | TwoSample_MR | MDD | TG_by_PG     |
| Simple mode               | 108 | 0.1490407  | 0.0636666 | 0.0210874 | TwoSample_MR | MDD | TG_by_PG     |
| Weighted mode             | 108 | 0.126478   | 0.058155  | 0.0318438 | TwoSample_MR | MDD | TG_by_PG     |
| MR Egger                  | 108 | -0.034466  | 0.089382  | 0.7005629 | TwoSample_MR | MDD | Total_CE     |
| Weighted median           | 108 | -0.0392492 | 0.0247825 | 0.1132515 | TwoSample_MR | MDD | Total_CE     |
| Inverse variance weighted | 108 | -0.0366045 | 0.0196043 | 0.0618783 | TwoSample_MR | MDD | Total_CE     |
| Simple mode               | 108 | -0.0788884 | 0.077936  | 0.3137165 | TwoSample_MR | MDD | Total_CE     |
| Weighted mode             | 108 | -0.0701567 | 0.0817044 | 0.3924444 | TwoSample_MR | MDD | Total_CE     |
| MR Egger                  | 108 | 0.1193979  | 0.0939162 | 0.2063964 | TwoSample_MR | MDD | Total_P      |
| Weighted median           | 108 | 0.0014931  | 0.0240262 | 0.9504474 | TwoSample_MR | MDD | Total_P      |
| Inverse variance weighted | 108 | -0.0016036 | 0.0207662 | 0.9384478 | TwoSample_MR | MDD | Total_P      |
| Simple mode               | 108 | 0.0086752  | 0.0838194 | 0.9177613 | TwoSample_MR | MDD | Total_P      |
| Weighted mode             | 108 | 0.014436   | 0.0838168 | 0.8635794 | TwoSample_MR | MDD | Total_P      |
| MR Egger                  | 108 | -0.0642302 | 0.0961866 | 0.5057338 | TwoSample_MR | MDD | Total_TG     |
| Weighted median           | 108 | 0.08367    | 0.0248925 | 0.0007759 | TwoSample_MR | MDD | Total_TG     |
| Inverse variance weighted | 108 | 0.0937994  | 0.0213834 | 0.0000115 | TwoSample_MR | MDD | Total_TG     |
| Simple mode               | 108 | 0.1003354  | 0.0777913 | 0.1999003 | TwoSample_MR | MDD | Total_TG     |
| Weighted mode             | 108 | 0.0939459  | 0.0758893 | 0.2184504 | TwoSample_MR | MDD | Total_TG     |
| MR Egger                  | 108 | 0.0473825  | 0.1763137 | 0.7886523 | TwoSample_MR | MDD | Unsaturation |
| Weighted median           | 108 | -0.0850081 | 0.0251523 | 0.0007256 | TwoSample_MR | MDD | Unsaturation |
| Inverse variance weighted | 108 | -0.1093329 | 0.0388172 | 0.0048534 | TwoSample_MR | MDD | Unsaturation |
| Simple mode               | 108 | -0.1394672 | 0.0714158 | 0.0534445 | TwoSample_MR | MDD | Unsaturation |
| Weighted mode             | 108 | -0.1394672 | 0.0663919 | 0.0380196 | TwoSample_MR | MDD | Unsaturation |
| MR Egger                  | 108 | -0.1213888 | 0.0845281 | 0.1539254 | TwoSample_MR | MDD | VLDL_FC      |
| Weighted median           | 108 | 0.040934   | 0.0253536 | 0.1064136 | TwoSample_MR | MDD | VLDL_FC      |
| Inverse variance weighted | 108 | 0.0493852  | 0.0189138 | 0.0090262 | TwoSample_MR | MDD | VLDL_FC      |
| Simple mode               | 108 | 0.0288359  | 0.0653654 | 0.6599952 | TwoSample_MR | MDD | VLDL_FC      |
| Weighted mode             | 108 | 0.0288359  | 0.0671217 | 0.6683461 | TwoSample_MR | MDD | VLDL_FC      |
| MR Egger                  | 108 | -0.1060687 | 0.0900116 | 0.2412802 | TwoSample_MR | MDD | VLDL_L       |
| Weighted median           | 108 | 0.0615789  | 0.024222  | 0.0110134 | TwoSample_MR | MDD | VLDL_L       |
| Inverse variance weighted | 108 | 0.0736427  | 0.0201335 | 0.0002545 | TwoSample_MR | MDD | VLDL_L       |
| Simple mode               | 108 | 0.0831542  | 0.0698827 | 0.2367148 | TwoSample_MR | MDD | VLDL_L       |
| Weighted mode             | 108 | 0.0772887  | 0.0667487 | 0.2494811 | TwoSample_MR | MDD | VLDL_L       |
| MR Egger                  | 108 | -0.1112465 | 0.0865755 | 0.2016052 | TwoSample_MR | MDD | VLDL_PL      |
| Weighted median           | 108 | 0.0528203  | 0.0240844 | 0.0282979 | TwoSample_MR | MDD | VLDL_PL      |
| Inverse variance weighted | 108 | 0.0625069  | 0.0193676 | 0.0012492 | TwoSample_MR | MDD | VLDL_PL      |
| Simple mode               | 108 | 0.0633802  | 0.0705836 | 0.3712315 | TwoSample_MR | MDD | VLDL_PL      |
| Weighted mode             | 108 | 0.057646   | 0.06715   | 0.3925535 | TwoSample_MR | MDD | VLDL_PL      |
| MR Egger                  | 108 | -0.0862813 | 0.0957993 | 0.3698181 | TwoSample_MR | MDD | VLDL_TG      |
| Weighted median           | 108 | 0.0875126  | 0.024496  | 0.0003536 | TwoSample_MR | MDD | VLDL_TG      |
| Inverse variance weighted | 108 | 0.0945365  | 0.021387  | 0.0000099 | TwoSample_MR | MDD | VLDL_TG      |
| Simple mode               | 108 | 0.1019205  | 0.0690151 | 0.1426706 | TwoSample_MR | MDD | VLDL_TG      |
| Weighted mode             | 108 | 0.0894501  | 0.0694775 | 0.2007088 | TwoSample_MR | MDD | VLDL_TG      |
| MR Egger                  | 108 | -0.097012  | 0.0951045 | 0.3100241 | TwoSample_MR | MDD | VLDL_size    |
| Weighted median           | 108 | 0.0655982  | 0.0236466 | 0.0055354 | TwoSample_MR | MDD | VLDL_size    |
| Inverse variance weighted | 108 | 0.1008164  | 0.0213106 | 0.0000022 | TwoSample_MR | MDD | VLDL_size    |
| Simple mode               | 108 | 0.0527944  | 0.061621  | 0.3934919 | TwoSample_MR | MDD | VLDL_size    |
| Weighted mode             | 108 | 0.0527944  | 0.0597079 | 0.3785639 | TwoSample_MR | MDD | VLDL_size    |
| MR Egger                  | 108 | 0.0460789  | 0.1026475 | 0.6544173 | TwoSample_MR | MDD | XL_HDL_C     |
| Weighted median           | 108 | -0.0811916 | 0.0241303 | 0.0007662 | TwoSample_MR | MDD | XL_HDL_C     |
| Inverse variance weighted | 108 | -0.1085324 | 0.0227649 | 0.0000019 | TwoSample_MR | MDD | XL_HDL_C     |
| Simple mode               | 108 | -0.0038446 | 0.0732127 | 0.9582182 | TwoSample_MR | MDD | XL_HDL_C     |
| Weighted mode             | 108 | -0.0108784 | 0.0670774 | 0.8714728 | TwoSample_MR | MDD | XL_HDL_C     |
| MR Egger                  | 108 | 0.0671016  | 0.1018949 | 0.5116206 | TwoSample_MR | MDD | XL_HDL_CE    |
| Weighted median           | 108 | -0.0906519 | 0.0239799 | 0.0001566 | TwoSample_MR | MDD | XL_HDL_CE    |
| Inverse variance weighted | 108 | -0.1048883 | 0.0226614 | 0.0000037 | TwoSample_MR | MDD | XL_HDL_CE    |
| Simple mode               | 108 | 0.001317   | 0.0719617 | 0.9854321 | TwoSample_MR | MDD | XL_HDL_CE    |
| Weighted mode             | 108 | 0.001317   | 0.0677903 | 0.9845358 | TwoSample_MR | MDD | XL_HDL_CE    |
| MR Egger                  | 108 | -0.0307203 | 0.1042087 | 0.768726  | TwoSample_MR | MDD | XL_HDL_FC    |
| Weighted median           | 108 | -0.0942132 | 0.0249696 | 0.0001612 | TwoSample_MR | MDD | XL_HDL_FC    |
| Inverse variance weighted | 108 | -0.114635  | 0.022929  | 0.0000006 | TwoSample_MR | MDD | XL_HDL_FC    |

|                           |     |            |           |           |              |     |                |
|---------------------------|-----|------------|-----------|-----------|--------------|-----|----------------|
| Simple mode               | 108 | -0.0157798 | 0.0760959 | 0.8361173 | TwoSample_MR | MDD | XL_HDL_FC      |
| Weighted mode             | 108 | -0.0195793 | 0.0734011 | 0.7901802 | TwoSample_MR | MDD | XL_HDL_FC      |
| MR Egger                  | 108 | -0.1882638 | 0.0895752 | 0.0379458 | TwoSample_MR | MDD | XL_HDL_FC_pct  |
| Weighted median           | 108 | 0.0203043  | 0.0226748 | 0.3705437 | TwoSample_MR | MDD | XL_HDL_FC_pct  |
| Inverse variance weighted | 108 | 0.0588756  | 0.020373  | 0.0038539 | TwoSample_MR | MDD | XL_HDL_FC_pct  |
| Simple mode               | 108 | -0.0144502 | 0.075584  | 0.848746  | TwoSample_MR | MDD | XL_HDL_FC_pct  |
| Weighted mode             | 108 | -0.0116501 | 0.0705143 | 0.8690859 | TwoSample_MR | MDD | XL_HDL_FC_pct  |
| MR Egger                  | 108 | 0.0621785  | 0.0992543 | 0.5323623 | TwoSample_MR | MDD | XL_HDL_L       |
| Weighted median           | 108 | -0.0736329 | 0.0240025 | 0.002157  | TwoSample_MR | MDD | XL_HDL_L       |
| Inverse variance weighted | 108 | -0.0993926 | 0.0220523 | 0.0000066 | TwoSample_MR | MDD | XL_HDL_L       |
| Simple mode               | 108 | 0.0045406  | 0.0738193 | 0.9510684 | TwoSample_MR | MDD | XL_HDL_L       |
| Weighted mode             | 108 | 0.0045406  | 0.0715059 | 0.9494875 | TwoSample_MR | MDD | XL_HDL_L       |
| MR Egger                  | 108 | 0.0530931  | 0.0986735 | 0.5916572 | TwoSample_MR | MDD | XL_HDL_P       |
| Weighted median           | 108 | -0.0682041 | 0.0237141 | 0.0040263 | TwoSample_MR | MDD | XL_HDL_P       |
| Inverse variance weighted | 108 | -0.089919  | 0.0218648 | 0.0000391 | TwoSample_MR | MDD | XL_HDL_P       |
| Simple mode               | 108 | -0.0028275 | 0.0794568 | 0.9716788 | TwoSample_MR | MDD | XL_HDL_P       |
| Weighted mode             | 108 | 0.0077108  | 0.0777911 | 0.9212268 | TwoSample_MR | MDD | XL_HDL_P       |
| MR Egger                  | 108 | 0.0741992  | 0.0973497 | 0.4476379 | TwoSample_MR | MDD | XL_HDL_PL      |
| Weighted median           | 108 | -0.0662213 | 0.0246644 | 0.0072552 | TwoSample_MR | MDD | XL_HDL_PL      |
| Inverse variance weighted | 108 | -0.0963752 | 0.0216729 | 0.0000087 | TwoSample_MR | MDD | XL_HDL_PL      |
| Simple mode               | 108 | 0.0054136  | 0.074356  | 0.942096  | TwoSample_MR | MDD | XL_HDL_PL      |
| Weighted mode             | 108 | 0.0087596  | 0.0674177 | 0.8968655 | TwoSample_MR | MDD | XL_HDL_PL      |
| MR Egger                  | 108 | -0.0381645 | 0.09999   | 0.7034609 | TwoSample_MR | MDD | XL_HDL_TG_pct  |
| Weighted median           | 108 | 0.0719727  | 0.0251728 | 0.0042479 | TwoSample_MR | MDD | XL_HDL_TG_pct  |
| Inverse variance weighted | 108 | 0.1154466  | 0.0221886 | 0.0000002 | TwoSample_MR | MDD | XL_HDL_TG_pct  |
| Simple mode               | 108 | 0.0298359  | 0.0711392 | 0.6757638 | TwoSample_MR | MDD | XL_HDL_TG_pct  |
| Weighted mode             | 108 | 0.0477081  | 0.0660995 | 0.4720146 | TwoSample_MR | MDD | XL_HDL_TG_pct  |
| MR Egger                  | 108 | -0.1247457 | 0.0885253 | 0.1617168 | TwoSample_MR | MDD | XL_VLDL_C      |
| Weighted median           | 108 | 0.0691438  | 0.0244516 | 0.0046872 | TwoSample_MR | MDD | XL_VLDL_C      |
| Inverse variance weighted | 108 | 0.0734942  | 0.0198977 | 0.0002211 | TwoSample_MR | MDD | XL_VLDL_C      |
| Simple mode               | 108 | 0.1022705  | 0.0657852 | 0.1229911 | TwoSample_MR | MDD | XL_VLDL_C      |
| Weighted mode             | 108 | 0.0993496  | 0.0621472 | 0.1128546 | TwoSample_MR | MDD | XL_VLDL_C      |
| MR Egger                  | 108 | -0.1304235 | 0.0847624 | 0.1268585 | TwoSample_MR | MDD | XL_VLDL_CE     |
| Weighted median           | 108 | 0.0486075  | 0.024507  | 0.0473215 | TwoSample_MR | MDD | XL_VLDL_CE     |
| Inverse variance weighted | 108 | 0.0612329  | 0.0190595 | 0.0013148 | TwoSample_MR | MDD | XL_VLDL_CE     |
| Simple mode               | 108 | 0.0526522  | 0.0606574 | 0.3873224 | TwoSample_MR | MDD | XL_VLDL_CE     |
| Weighted mode             | 108 | 0.0498703  | 0.061765  | 0.4212154 | TwoSample_MR | MDD | XL_VLDL_CE     |
| MR Egger                  | 108 | 0.0230698  | 0.1010813 | 0.8199072 | TwoSample_MR | MDD | XL_VLDL_CE_pct |
| Weighted median           | 108 | -0.0855639 | 0.0254442 | 0.0007715 | TwoSample_MR | MDD | XL_VLDL_CE_pct |
| Inverse variance weighted | 108 | -0.0936713 | 0.0223228 | 0.0000271 | TwoSample_MR | MDD | XL_VLDL_CE_pct |
| Simple mode               | 108 | -0.0651047 | 0.0645768 | 0.3156448 | TwoSample_MR | MDD | XL_VLDL_CE_pct |
| Weighted mode             | 108 | -0.075279  | 0.0541414 | 0.1672883 | TwoSample_MR | MDD | XL_VLDL_CE_pct |
| MR Egger                  | 108 | 0.0291698  | 0.1022413 | 0.7759687 | TwoSample_MR | MDD | XL_VLDL_C_pct  |
| Weighted median           | 108 | -0.0926865 | 0.0246224 | 0.000167  | TwoSample_MR | MDD | XL_VLDL_C_pct  |
| Inverse variance weighted | 108 | -0.0958011 | 0.0225959 | 0.0000224 | TwoSample_MR | MDD | XL_VLDL_C_pct  |
| Simple mode               | 108 | -0.0733215 | 0.0643811 | 0.2573023 | TwoSample_MR | MDD | XL_VLDL_C_pct  |
| Weighted mode             | 108 | -0.0835576 | 0.0515168 | 0.1077573 | TwoSample_MR | MDD | XL_VLDL_C_pct  |
| MR Egger                  | 108 | -0.1132111 | 0.0918822 | 0.2206258 | TwoSample_MR | MDD | XL_VLDL_FC     |
| Weighted median           | 108 | 0.0742946  | 0.0244183 | 0.0023456 | TwoSample_MR | MDD | XL_VLDL_FC     |
| Inverse variance weighted | 108 | 0.0831878  | 0.0206101 | 0.0000543 | TwoSample_MR | MDD | XL_VLDL_FC     |
| Simple mode               | 108 | 0.1321275  | 0.0674853 | 0.0528489 | TwoSample_MR | MDD | XL_VLDL_FC     |
| Weighted mode             | 108 | 0.1195963  | 0.0654941 | 0.0706296 | TwoSample_MR | MDD | XL_VLDL_FC     |
| MR Egger                  | 108 | 0.0403612  | 0.1023857 | 0.6942203 | TwoSample_MR | MDD | XL_VLDL_FC_pct |
| Weighted median           | 108 | -0.0747353 | 0.025034  | 0.0028325 | TwoSample_MR | MDD | XL_VLDL_FC_pct |
| Inverse variance weighted | 108 | -0.0893022 | 0.0226345 | 0.0000797 | TwoSample_MR | MDD | XL_VLDL_FC_pct |
| Simple mode               | 108 | -0.1217942 | 0.0680764 | 0.0764311 | TwoSample_MR | MDD | XL_VLDL_FC_pct |
| Weighted mode             | 108 | -0.1075447 | 0.0600417 | 0.0760937 | TwoSample_MR | MDD | XL_VLDL_FC_pct |
| MR Egger                  | 108 | -0.1109747 | 0.095329  | 0.2469875 | TwoSample_MR | MDD | XL_VLDL_L      |
| Weighted median           | 108 | 0.0886957  | 0.0245143 | 0.0002968 | TwoSample_MR | MDD | XL_VLDL_L      |
| Inverse variance weighted | 108 | 0.0928537  | 0.0213843 | 0.0000141 | TwoSample_MR | MDD | XL_VLDL_L      |
| Simple mode               | 108 | 0.1457912  | 0.070862  | 0.0420793 | TwoSample_MR | MDD | XL_VLDL_L      |
| Weighted mode             | 108 | 0.130229   | 0.0672    | 0.055267  | TwoSample_MR | MDD | XL_VLDL_L      |

|                           |     |            |           |           |              |     |                |
|---------------------------|-----|------------|-----------|-----------|--------------|-----|----------------|
| MR Egger                  | 108 | -0.1046125 | 0.0948724 | 0.2726699 | TwoSample_MR | MDD | XL_VLDL_P      |
| Weighted median           | 108 | 0.0783325  | 0.0251671 | 0.0018551 | TwoSample_MR | MDD | XL_VLDL_P      |
| Inverse variance weighted | 108 | 0.0920552  | 0.0212537 | 0.0000148 | TwoSample_MR | MDD | XL_VLDL_P      |
| Simple mode               | 108 | 0.1424983  | 0.0695573 | 0.0429441 | TwoSample_MR | MDD | XL_VLDL_P      |
| Weighted mode             | 108 | 0.1173755  | 0.0653502 | 0.0753006 | TwoSample_MR | MDD | XL_VLDL_P      |
| MR Egger                  | 108 | -0.116293  | 0.0935171 | 0.2164093 | TwoSample_MR | MDD | XL_VLDL_PL     |
| Weighted median           | 108 | 0.0758504  | 0.0240975 | 0.0016459 | TwoSample_MR | MDD | XL_VLDL_PL     |
| Inverse variance weighted | 108 | 0.0884453  | 0.0209995 | 0.0000253 | TwoSample_MR | MDD | XL_VLDL_PL     |
| Simple mode               | 108 | 0.1416071  | 0.0683361 | 0.040649  | TwoSample_MR | MDD | XL_VLDL_PL     |
| Weighted mode             | 108 | 0.12604    | 0.0669517 | 0.0624779 | TwoSample_MR | MDD | XL_VLDL_PL     |
| MR Egger                  | 108 | -0.1056947 | 0.0983072 | 0.2847498 | TwoSample_MR | MDD | XL_VLDL_TG     |
| Weighted median           | 108 | 0.1053273  | 0.0255381 | 0.0000372 | TwoSample_MR | MDD | XL_VLDL_TG     |
| Inverse variance weighted | 108 | 0.0992173  | 0.0220296 | 0.0000067 | TwoSample_MR | MDD | XL_VLDL_TG     |
| Simple mode               | 108 | 0.1576927  | 0.0743293 | 0.0361852 | TwoSample_MR | MDD | XL_VLDL_TG     |
| Weighted mode             | 108 | 0.1385824  | 0.0653712 | 0.0363239 | TwoSample_MR | MDD | XL_VLDL_TG     |
| MR Egger                  | 108 | -0.0068398 | 0.0996471 | 0.9454054 | TwoSample_MR | MDD | XL_VLDL_TG_pct |
| Weighted median           | 108 | 0.0953845  | 0.0240521 | 0.0000732 | TwoSample_MR | MDD | XL_VLDL_TG_pct |
| Inverse variance weighted | 108 | 0.0884344  | 0.0219573 | 0.0000564 | TwoSample_MR | MDD | XL_VLDL_TG_pct |
| Simple mode               | 108 | 0.0889529  | 0.0628171 | 0.1596616 | TwoSample_MR | MDD | XL_VLDL_TG_pct |
| Weighted mode             | 108 | 0.0954921  | 0.054305  | 0.081532  | TwoSample_MR | MDD | XL_VLDL_TG_pct |
| MR Egger                  | 108 | -0.0910129 | 0.1013396 | 0.3711687 | TwoSample_MR | MDD | XS_VLDL_CE_pct |
| Weighted median           | 108 | -0.1036245 | 0.0236245 | 0.0000115 | TwoSample_MR | MDD | XS_VLDL_CE_pct |
| Inverse variance weighted | 108 | -0.1228486 | 0.0222401 | 0         | TwoSample_MR | MDD | XS_VLDL_CE_pct |
| Simple mode               | 108 | -0.1136037 | 0.0663872 | 0.0899363 | TwoSample_MR | MDD | XS_VLDL_CE_pct |
| Weighted mode             | 108 | -0.1136037 | 0.0662236 | 0.089156  | TwoSample_MR | MDD | XS_VLDL_CE_pct |
| MR Egger                  | 108 | -0.1108525 | 0.1032793 | 0.2855617 | TwoSample_MR | MDD | XS_VLDL_C_pct  |
| Weighted median           | 108 | -0.1153357 | 0.0238168 | 0.0000013 | TwoSample_MR | MDD | XS_VLDL_C_pct  |
| Inverse variance weighted | 108 | -0.1240725 | 0.0226566 | 0         | TwoSample_MR | MDD | XS_VLDL_C_pct  |
| Simple mode               | 108 | -0.133772  | 0.0633004 | 0.0369009 | TwoSample_MR | MDD | XS_VLDL_C_pct  |
| Weighted mode             | 108 | -0.133772  | 0.0610954 | 0.0307282 | TwoSample_MR | MDD | XS_VLDL_C_pct  |
| MR Egger                  | 108 | -0.200275  | 0.1035628 | 0.055798  | TwoSample_MR | MDD | XS_VLDL_FC_pct |
| Weighted median           | 108 | -0.0982301 | 0.0249266 | 0.0000812 | TwoSample_MR | MDD | XS_VLDL_FC_pct |
| Inverse variance weighted | 108 | -0.0960376 | 0.022828  | 0.0000259 | TwoSample_MR | MDD | XS_VLDL_FC_pct |
| Simple mode               | 108 | -0.1409695 | 0.0656973 | 0.0341543 | TwoSample_MR | MDD | XS_VLDL_FC_pct |
| Weighted mode             | 108 | -0.1409695 | 0.0646024 | 0.0312886 | TwoSample_MR | MDD | XS_VLDL_FC_pct |
| MR Egger                  | 108 | -0.0488634 | 0.0824945 | 0.5548955 | TwoSample_MR | MDD | XS_VLDL_PL_pct |
| Weighted median           | 108 | 0.0619305  | 0.024721  | 0.0122389 | TwoSample_MR | MDD | XS_VLDL_PL_pct |
| Inverse variance weighted | 108 | 0.0727944  | 0.0182868 | 0.0000687 | TwoSample_MR | MDD | XS_VLDL_PL_pct |
| Simple mode               | 108 | 0.0512566  | 0.0637991 | 0.423521  | TwoSample_MR | MDD | XS_VLDL_PL_pct |
| Weighted mode             | 108 | 0.0640704  | 0.0615822 | 0.3004965 | TwoSample_MR | MDD | XS_VLDL_PL_pct |
| MR Egger                  | 108 | 0.0183218  | 0.0910906 | 0.8409757 | TwoSample_MR | MDD | XS_VLDL_TG     |
| Weighted median           | 108 | 0.0879937  | 0.0246966 | 0.0003667 | TwoSample_MR | MDD | XS_VLDL_TG     |
| Inverse variance weighted | 108 | 0.085075   | 0.0200334 | 0.0000217 | TwoSample_MR | MDD | XS_VLDL_TG     |
| Simple mode               | 108 | 0.0998697  | 0.0735046 | 0.1771033 | TwoSample_MR | MDD | XS_VLDL_TG     |
| Weighted mode             | 108 | 0.0941448  | 0.0733385 | 0.2020192 | TwoSample_MR | MDD | XS_VLDL_TG     |
| MR Egger                  | 108 | 0.1317897  | 0.1051832 | 0.2129793 | TwoSample_MR | MDD | XS_VLDL_TG_pct |
| Weighted median           | 108 | 0.1231057  | 0.0247354 | 0.0000006 | TwoSample_MR | MDD | XS_VLDL_TG_pct |
| Inverse variance weighted | 108 | 0.1235534  | 0.0230734 | 0.0000001 | TwoSample_MR | MDD | XS_VLDL_TG_pct |
| Simple mode               | 108 | 0.1666903  | 0.0673644 | 0.0149146 | TwoSample_MR | MDD | XS_VLDL_TG_pct |
| Weighted mode             | 108 | 0.1701994  | 0.0686529 | 0.0147313 | TwoSample_MR | MDD | XS_VLDL_TG_pct |
| MR Egger                  | 108 | -0.0328402 | 0.0983754 | 0.7391711 | TwoSample_MR | MDD | XXL_VLDL_C     |
| Weighted median           | 108 | 0.0996144  | 0.0248239 | 0.00006   | TwoSample_MR | MDD | XXL_VLDL_C     |
| Inverse variance weighted | 108 | 0.1024825  | 0.0217867 | 0.0000026 | TwoSample_MR | MDD | XXL_VLDL_C     |
| Simple mode               | 108 | 0.1578329  | 0.072162  | 0.0309044 | TwoSample_MR | MDD | XXL_VLDL_C     |
| Weighted mode             | 108 | 0.1517247  | 0.0728258 | 0.0395981 | TwoSample_MR | MDD | XXL_VLDL_C     |
| MR Egger                  | 108 | -0.0420691 | 0.0979528 | 0.6684432 | TwoSample_MR | MDD | XXL_VLDL_CE    |
| Weighted median           | 108 | 0.106221   | 0.0242665 | 0.000012  | TwoSample_MR | MDD | XXL_VLDL_CE    |
| Inverse variance weighted | 108 | 0.0998791  | 0.0217141 | 0.0000042 | TwoSample_MR | MDD | XXL_VLDL_CE    |
| Simple mode               | 108 | 0.1474082  | 0.072805  | 0.0453888 | TwoSample_MR | MDD | XXL_VLDL_CE    |
| Weighted mode             | 108 | 0.138308   | 0.0707569 | 0.0532284 | TwoSample_MR | MDD | XXL_VLDL_CE    |
| MR Egger                  | 108 | -0.0292412 | 0.0985706 | 0.7673126 | TwoSample_MR | MDD | XXL_VLDL_FC    |
| Weighted median           | 108 | 0.0904131  | 0.0246836 | 0.0002494 | TwoSample_MR | MDD | XXL_VLDL_FC    |

|                           |     |            |           |           |              |              |                 |
|---------------------------|-----|------------|-----------|-----------|--------------|--------------|-----------------|
| Inverse variance weighted | 108 | 0.1029572  | 0.0218206 | 0.0000024 | TwoSample_MR | MDD          | XXL_VLDL_FC     |
| Simple mode               | 108 | 0.1570263  | 0.0709542 | 0.0290165 | TwoSample_MR | MDD          | XXL_VLDL_FC     |
| Weighted mode             | 108 | 0.1507519  | 0.0685471 | 0.0300123 | TwoSample_MR | MDD          | XXL_VLDL_FC     |
| MR Egger                  | 108 | -0.0687228 | 0.0979677 | 0.4845383 | TwoSample_MR | MDD          | XXL_VLDL_L      |
| Weighted median           | 108 | 0.1121153  | 0.0245612 | 0.000005  | TwoSample_MR | MDD          | XXL_VLDL_L      |
| Inverse variance weighted | 108 | 0.0989111  | 0.0218076 | 0.0000057 | TwoSample_MR | MDD          | XXL_VLDL_L      |
| Simple mode               | 108 | 0.155625   | 0.0681667 | 0.0244063 | TwoSample_MR | MDD          | XXL_VLDL_L      |
| Weighted mode             | 108 | 0.155625   | 0.0649786 | 0.0183575 | TwoSample_MR | MDD          | XXL_VLDL_L      |
| MR Egger                  | 108 | -0.0550746 | 0.0978957 | 0.5749057 | TwoSample_MR | MDD          | XXL_VLDL_P      |
| Weighted median           | 108 | 0.1019024  | 0.0246549 | 0.0000358 | TwoSample_MR | MDD          | XXL_VLDL_P      |
| Inverse variance weighted | 108 | 0.101442   | 0.0217515 | 0.0000031 | TwoSample_MR | MDD          | XXL_VLDL_P      |
| Simple mode               | 108 | 0.1637175  | 0.0713674 | 0.023743  | TwoSample_MR | MDD          | XXL_VLDL_P      |
| Weighted mode             | 108 | 0.1606548  | 0.0724977 | 0.0288089 | TwoSample_MR | MDD          | XXL_VLDL_P      |
| MR Egger                  | 108 | -0.0399942 | 0.0978113 | 0.6834444 | TwoSample_MR | MDD          | XXL_VLDL_PL     |
| Weighted median           | 108 | 0.0896769  | 0.0244563 | 0.0002456 | TwoSample_MR | MDD          | XXL_VLDL_PL     |
| Inverse variance weighted | 108 | 0.1064028  | 0.0216995 | 0.0000009 | TwoSample_MR | MDD          | XXL_VLDL_PL     |
| Simple mode               | 108 | 0.1560608  | 0.0679222 | 0.0235277 | TwoSample_MR | MDD          | XXL_VLDL_PL     |
| Weighted mode             | 108 | 0.1530212  | 0.0699226 | 0.030812  | TwoSample_MR | MDD          | XXL_VLDL_PL     |
| MR Egger                  | 108 | 0.178329   | 0.0884501 | 0.0463135 | TwoSample_MR | MDD          | XXL_VLDL_PL_pct |
| Weighted median           | 108 | 0.0359582  | 0.025281  | 0.1549274 | TwoSample_MR | MDD          | XXL_VLDL_PL_pct |
| Inverse variance weighted | 108 | 0.0606765  | 0.0195697 | 0.0019317 | TwoSample_MR | MDD          | XXL_VLDL_PL_pct |
| Simple mode               | 108 | -0.0547996 | 0.0741743 | 0.4616487 | TwoSample_MR | MDD          | XXL_VLDL_PL_pct |
| Weighted mode             | 108 | -0.0575055 | 0.0735714 | 0.4361588 | TwoSample_MR | MDD          | XXL_VLDL_PL_pct |
| MR Egger                  | 108 | -0.0843522 | 0.0979446 | 0.3910587 | TwoSample_MR | MDD          | XXL_VLDL_TG     |
| Weighted median           | 108 | 0.1011882  | 0.024636  | 0.00004   | TwoSample_MR | MDD          | XXL_VLDL_TG     |
| Inverse variance weighted | 108 | 0.0950513  | 0.0218481 | 0.0000136 | TwoSample_MR | MDD          | XXL_VLDL_TG     |
| Simple mode               | 108 | 0.1302121  | 0.0653307 | 0.0487935 | TwoSample_MR | MDD          | XXL_VLDL_TG     |
| Weighted mode             | 108 | 0.1362733  | 0.0670184 | 0.0444901 | TwoSample_MR | MDD          | XXL_VLDL_TG     |
| MR Egger                  | 112 | 0.0035335  | 0.0282478 | 0.9006821 | TwoSample_MR | M_HDL_CE     | MDD             |
| Weighted median           | 112 | 0.0169073  | 0.0185203 | 0.361293  | TwoSample_MR | M_HDL_CE     | MDD             |
| Inverse variance weighted | 112 | 0.027633   | 0.0165354 | 0.094694  | TwoSample_MR | M_HDL_CE     | MDD             |
| Simple mode               | 112 | -0.0106186 | 0.0304467 | 0.7279303 | TwoSample_MR | M_HDL_CE     | MDD             |
| Weighted mode             | 112 | 0.0126273  | 0.0194481 | 0.5174958 | TwoSample_MR | M_HDL_CE     | MDD             |
| MR Egger                  | 117 | -0.0136864 | 0.0216825 | 0.5291492 | TwoSample_MR | M_HDL_CE_pct | MDD             |
| Weighted median           | 117 | 0.0003032  | 0.0162096 | 0.9850779 | TwoSample_MR | M_HDL_CE_pct | MDD             |
| Inverse variance weighted | 117 | -0.011638  | 0.0136917 | 0.3953248 | TwoSample_MR | M_HDL_CE_pct | MDD             |
| Simple mode               | 117 | -0.0110793 | 0.029334  | 0.7063488 | TwoSample_MR | M_HDL_CE_pct | MDD             |
| Weighted mode             | 117 | -0.0110793 | 0.0147552 | 0.4542517 | TwoSample_MR | M_HDL_CE_pct | MDD             |
| MR Egger                  | 104 | 0.0005469  | 0.0271863 | 0.9839885 | TwoSample_MR | M_HDL_C      | MDD             |
| Weighted median           | 104 | 0.0149782  | 0.0186233 | 0.421241  | TwoSample_MR | M_HDL_C      | MDD             |
| Inverse variance weighted | 104 | 0.0227144  | 0.0159981 | 0.1556622 | TwoSample_MR | M_HDL_C      | MDD             |
| Simple mode               | 104 | -0.0101278 | 0.0323375 | 0.7547705 | TwoSample_MR | M_HDL_C      | MDD             |
| Weighted mode             | 104 | 0.0124592  | 0.0201959 | 0.5386509 | TwoSample_MR | M_HDL_C      | MDD             |
| MR Egger                  | 116 | -0.0133333 | 0.0201345 | 0.5091722 | TwoSample_MR | M_HDL_C_pct  | MDD             |
| Weighted median           | 116 | -0.0283735 | 0.0180541 | 0.1160484 | TwoSample_MR | M_HDL_C_pct  | MDD             |
| Inverse variance weighted | 116 | -0.0122743 | 0.0124935 | 0.3258776 | TwoSample_MR | M_HDL_C_pct  | MDD             |
| Simple mode               | 116 | -0.027548  | 0.0323329 | 0.3959789 | TwoSample_MR | M_HDL_C_pct  | MDD             |
| Weighted mode             | 116 | -0.0175472 | 0.0164994 | 0.2897815 | TwoSample_MR | M_HDL_C_pct  | MDD             |
| MR Egger                  | 97  | 0.0051733  | 0.027971  | 0.8536612 | TwoSample_MR | M_HDL_FC     | MDD             |
| Weighted median           | 97  | 0.0049625  | 0.0186573 | 0.7902516 | TwoSample_MR | M_HDL_FC     | MDD             |
| Inverse variance weighted | 97  | 0.0131797  | 0.0163971 | 0.4215219 | TwoSample_MR | M_HDL_FC     | MDD             |
| Simple mode               | 97  | -0.0064359 | 0.0318661 | 0.8403696 | TwoSample_MR | M_HDL_FC     | MDD             |
| Weighted mode             | 97  | 0.0062744  | 0.0181311 | 0.7300593 | TwoSample_MR | M_HDL_FC     | MDD             |
| MR Egger                  | 112 | -0.0287081 | 0.0207522 | 0.1693523 | TwoSample_MR | M_HDL_FC_pct | MDD             |
| Weighted median           | 112 | -0.0204349 | 0.0174733 | 0.2422041 | TwoSample_MR | M_HDL_FC_pct | MDD             |
| Inverse variance weighted | 112 | -0.0236948 | 0.0135043 | 0.0793256 | TwoSample_MR | M_HDL_FC_pct | MDD             |
| Simple mode               | 112 | -0.030728  | 0.0341465 | 0.370128  | TwoSample_MR | M_HDL_FC_pct | MDD             |
| Weighted mode             | 112 | -0.0208036 | 0.0165156 | 0.2104455 | TwoSample_MR | M_HDL_FC_pct | MDD             |
| MR Egger                  | 122 | 0.0066767  | 0.0251029 | 0.7907158 | TwoSample_MR | M_HDL_PL_pct | MDD             |
| Weighted median           | 122 | 0.0156366  | 0.0182032 | 0.3903404 | TwoSample_MR | M_HDL_PL_pct | MDD             |
| Inverse variance weighted | 122 | 0.0100798  | 0.0147312 | 0.4938208 | TwoSample_MR | M_HDL_PL_pct | MDD             |
| Simple mode               | 122 | 0.0353852  | 0.0390502 | 0.3666601 | TwoSample_MR | M_HDL_PL_pct | MDD             |

|                           |     |            |           |           |              |               |     |
|---------------------------|-----|------------|-----------|-----------|--------------|---------------|-----|
| Weighted mode             | 122 | 0.0165637  | 0.0208803 | 0.4291721 | TwoSample_MR | M_HDL_PL_pct  | MDD |
| MR Egger                  | 97  | -0.0064347 | 0.027084  | 0.8127166 | TwoSample_MR | M_HDL_P       | MDD |
| Weighted median           | 97  | 0.0144595  | 0.0191758 | 0.450819  | TwoSample_MR | M_HDL_P       | MDD |
| Inverse variance weighted | 97  | 0.0175448  | 0.0162292 | 0.2796699 | TwoSample_MR | M_HDL_P       | MDD |
| Simple mode               | 97  | -0.0085273 | 0.032427  | 0.7931391 | TwoSample_MR | M_HDL_P       | MDD |
| Weighted mode             | 97  | -0.0000955 | 0.0182919 | 0.9958458 | TwoSample_MR | M_HDL_P       | MDD |
| MR Egger                  | 86  | 0.0061576  | 0.0176435 | 0.7279636 | TwoSample_MR | M_HDL_TG      | MDD |
| Weighted median           | 86  | 0.0130515  | 0.0153422 | 0.3949394 | TwoSample_MR | M_HDL_TG      | MDD |
| Inverse variance weighted | 86  | 0.0225557  | 0.011854  | 0.0570679 | TwoSample_MR | M_HDL_TG      | MDD |
| Simple mode               | 86  | -0.0079949 | 0.0242662 | 0.7426152 | TwoSample_MR | M_HDL_TG      | MDD |
| Weighted mode             | 86  | 0.005443   | 0.013844  | 0.6951789 | TwoSample_MR | M_HDL_TG      | MDD |
| MR Egger                  | 121 | 0.0204972  | 0.019479  | 0.2948059 | TwoSample_MR | M_HDL_TG_pct  | MDD |
| Weighted median           | 121 | 0.0183143  | 0.0153221 | 0.231976  | TwoSample_MR | M_HDL_TG_pct  | MDD |
| Inverse variance weighted | 121 | 0.0130648  | 0.0128215 | 0.3082119 | TwoSample_MR | M_HDL_TG_pct  | MDD |
| Simple mode               | 121 | 0.0134439  | 0.0260031 | 0.6061    | TwoSample_MR | M_HDL_TG_pct  | MDD |
| Weighted mode             | 121 | 0.0134439  | 0.0131914 | 0.3101865 | TwoSample_MR | M_HDL_TG_pct  | MDD |
| MR Egger                  | 102 | 0.003271   | 0.0212068 | 0.877729  | TwoSample_MR | M_LDL_TG      | MDD |
| Weighted median           | 102 | -0.0023547 | 0.0165723 | 0.8870128 | TwoSample_MR | M_LDL_TG      | MDD |
| Inverse variance weighted | 102 | 0.0065387  | 0.0131263 | 0.618389  | TwoSample_MR | M_LDL_TG      | MDD |
| Simple mode               | 102 | -0.0000128 | 0.0294818 | 0.9996557 | TwoSample_MR | M_LDL_TG      | MDD |
| Weighted mode             | 102 | 0.0027142  | 0.0148597 | 0.855437  | TwoSample_MR | M_LDL_TG      | MDD |
| MR Egger                  | 86  | 0.0140016  | 0.01442   | 0.3343418 | TwoSample_MR | M_LDL_TG_pct  | MDD |
| Weighted median           | 86  | 0.0088877  | 0.0147792 | 0.5475968 | TwoSample_MR | M_LDL_TG_pct  | MDD |
| Inverse variance weighted | 86  | 0.0240219  | 0.0102961 | 0.0196432 | TwoSample_MR | M_LDL_TG_pct  | MDD |
| Simple mode               | 86  | 0.0178222  | 0.0297305 | 0.550462  | TwoSample_MR | M_LDL_TG_pct  | MDD |
| Weighted mode             | 86  | 0.0056889  | 0.0125045 | 0.6503083 | TwoSample_MR | M_LDL_TG_pct  | MDD |
| MR Egger                  | 90  | 0.0137373  | 0.0237401 | 0.5643008 | TwoSample_MR | MUFA          | MDD |
| Weighted median           | 90  | 0.0279333  | 0.0180549 | 0.1218308 | TwoSample_MR | MUFA          | MDD |
| Inverse variance weighted | 90  | 0.0372712  | 0.0144973 | 0.0101435 | TwoSample_MR | MUFA          | MDD |
| Simple mode               | 90  | 0.0111691  | 0.0330136 | 0.73592   | TwoSample_MR | MUFA          | MDD |
| Weighted mode             | 90  | 0.0199088  | 0.0180542 | 0.2731193 | TwoSample_MR | MUFA          | MDD |
| MR Egger                  | 98  | 0.0386852  | 0.0206977 | 0.0646637 | TwoSample_MR | MUFA_pct      | MDD |
| Weighted median           | 98  | 0.0434932  | 0.0180042 | 0.0157037 | TwoSample_MR | MUFA_pct      | MDD |
| Inverse variance weighted | 98  | 0.0442173  | 0.0134159 | 0.0009811 | TwoSample_MR | MUFA_pct      | MDD |
| Simple mode               | 98  | 0.0282811  | 0.0314183 | 0.3702699 | TwoSample_MR | MUFA_pct      | MDD |
| Weighted mode             | 98  | 0.047032   | 0.0164023 | 0.005077  | TwoSample_MR | MUFA_pct      | MDD |
| MR Egger                  | 104 | -0.0292549 | 0.017953  | 0.1062861 | TwoSample_MR | M_VLDL_CE_pct | MDD |
| Weighted median           | 104 | -0.02193   | 0.0155824 | 0.15932   | TwoSample_MR | M_VLDL_CE_pct | MDD |
| Inverse variance weighted | 104 | -0.0465791 | 0.0121939 | 0.0001335 | TwoSample_MR | M_VLDL_CE_pct | MDD |
| Simple mode               | 104 | -0.0206317 | 0.0339374 | 0.5445703 | TwoSample_MR | M_VLDL_CE_pct | MDD |
| Weighted mode             | 104 | -0.0234393 | 0.0142048 | 0.1019691 | TwoSample_MR | M_VLDL_CE_pct | MDD |
| MR Egger                  | 103 | -0.0353829 | 0.0184936 | 0.0585471 | TwoSample_MR | M_VLDL_C_pct  | MDD |
| Weighted median           | 103 | -0.0269461 | 0.0164143 | 0.1006687 | TwoSample_MR | M_VLDL_C_pct  | MDD |
| Inverse variance weighted | 103 | -0.0494348 | 0.0124874 | 0.0000753 | TwoSample_MR | M_VLDL_C_pct  | MDD |
| Simple mode               | 103 | -0.0281186 | 0.0277938 | 0.3140818 | TwoSample_MR | M_VLDL_C_pct  | MDD |
| Weighted mode             | 103 | -0.0281186 | 0.0158788 | 0.0795765 | TwoSample_MR | M_VLDL_C_pct  | MDD |
| MR Egger                  | 89  | -0.0363956 | 0.0203558 | 0.0772619 | TwoSample_MR | M_VLDL_FC_pct | MDD |
| Weighted median           | 89  | -0.0328346 | 0.0173945 | 0.0590734 | TwoSample_MR | M_VLDL_FC_pct | MDD |
| Inverse variance weighted | 89  | -0.0525923 | 0.0135054 | 0.0000985 | TwoSample_MR | M_VLDL_FC_pct | MDD |
| Simple mode               | 89  | -0.0225333 | 0.0259813 | 0.3881426 | TwoSample_MR | M_VLDL_FC_pct | MDD |
| Weighted mode             | 89  | -0.0288734 | 0.0148846 | 0.0556052 | TwoSample_MR | M_VLDL_FC_pct | MDD |
| MR Egger                  | 83  | 0.0096575  | 0.0223781 | 0.6672078 | TwoSample_MR | M_VLDL_L      | MDD |
| Weighted median           | 83  | -0.0004089 | 0.0182264 | 0.9821028 | TwoSample_MR | M_VLDL_L      | MDD |
| Inverse variance weighted | 83  | 0.0000181  | 0.0134439 | 0.9989281 | TwoSample_MR | M_VLDL_L      | MDD |
| Simple mode               | 83  | -0.000328  | 0.0311319 | 0.9916204 | TwoSample_MR | M_VLDL_L      | MDD |
| Weighted mode             | 83  | -0.0031127 | 0.0200262 | 0.8768634 | TwoSample_MR | M_VLDL_L      | MDD |
| MR Egger                  | 96  | 0.0139845  | 0.0210721 | 0.5085402 | TwoSample_MR | M_VLDL_TG     | MDD |
| Weighted median           | 96  | 0.0245449  | 0.0178199 | 0.1683925 | TwoSample_MR | M_VLDL_TG     | MDD |
| Inverse variance weighted | 96  | 0.016826   | 0.0133384 | 0.2071377 | TwoSample_MR | M_VLDL_TG     | MDD |
| Simple mode               | 96  | 0.00256    | 0.0299213 | 0.9319971 | TwoSample_MR | M_VLDL_TG     | MDD |
| Weighted mode             | 96  | 0.0219053  | 0.0155948 | 0.1633864 | TwoSample_MR | M_VLDL_TG     | MDD |
| MR Egger                  | 99  | 0.0274891  | 0.0187458 | 0.1457689 | TwoSample_MR | M_VLDL_TG_pct | MDD |

|                           |     |            |           |           |              |               |     |
|---------------------------|-----|------------|-----------|-----------|--------------|---------------|-----|
| Weighted median           | 99  | 0.0280126  | 0.0167095 | 0.0936497 | TwoSample_MR | M_VLDL_TG_pct | MDD |
| Inverse variance weighted | 99  | 0.0558883  | 0.0128663 | 0.000014  | TwoSample_MR | M_VLDL_TG_pct | MDD |
| Simple mode               | 99  | 0.0220595  | 0.0288361 | 0.4461117 | TwoSample_MR | M_VLDL_TG_pct | MDD |
| Weighted mode             | 99  | 0.0284612  | 0.0150733 | 0.0619591 | TwoSample_MR | M_VLDL_TG_pct | MDD |
| MR Egger                  | 82  | -0.0319599 | 0.0245779 | 0.1972152 | TwoSample_MR | Omega_6_pct   | MDD |
| Weighted median           | 82  | -0.0352077 | 0.0201465 | 0.0805364 | TwoSample_MR | Omega_6_pct   | MDD |
| Inverse variance weighted | 82  | -0.024641  | 0.0148291 | 0.0965796 | TwoSample_MR | Omega_6_pct   | MDD |
| Simple mode               | 82  | -0.0231237 | 0.0342334 | 0.5012999 | TwoSample_MR | Omega_6_pct   | MDD |
| Weighted mode             | 82  | -0.0314019 | 0.020396  | 0.1275528 | TwoSample_MR | Omega_6_pct   | MDD |
| MR Egger                  | 89  | -0.0382504 | 0.0234197 | 0.1060285 | TwoSample_MR | PUFA_by_MUFA  | MDD |
| Weighted median           | 89  | -0.0417372 | 0.0183828 | 0.02318   | TwoSample_MR | PUFA_by_MUFA  | MDD |
| Inverse variance weighted | 89  | -0.0474931 | 0.0149248 | 0.0014618 | TwoSample_MR | PUFA_by_MUFA  | MDD |
| Simple mode               | 89  | -0.0220535 | 0.0289842 | 0.4487621 | TwoSample_MR | PUFA_by_MUFA  | MDD |
| Weighted mode             | 89  | -0.0523097 | 0.0169321 | 0.0026845 | TwoSample_MR | PUFA_by_MUFA  | MDD |
| MR Egger                  | 72  | -0.050375  | 0.0301444 | 0.0991626 | TwoSample_MR | PUFA_pct      | MDD |
| Weighted median           | 72  | -0.0486055 | 0.0222414 | 0.0288627 | TwoSample_MR | PUFA_pct      | MDD |
| Inverse variance weighted | 72  | -0.0572537 | 0.0176194 | 0.0011562 | TwoSample_MR | PUFA_pct      | MDD |
| Simple mode               | 72  | -0.0158541 | 0.0388347 | 0.6843229 | TwoSample_MR | PUFA_pct      | MDD |
| Weighted mode             | 72  | -0.0562293 | 0.0228009 | 0.0160764 | TwoSample_MR | PUFA_pct      | MDD |
| MR Egger                  | 34  | -0.0149478 | 0.0407908 | 0.7164413 | TwoSample_MR | Pyruvate      | MDD |
| Weighted median           | 34  | 0.0148562  | 0.0327883 | 0.6504803 | TwoSample_MR | Pyruvate      | MDD |
| Inverse variance weighted | 34  | 0.0022197  | 0.0216931 | 0.9184997 | TwoSample_MR | Pyruvate      | MDD |
| Simple mode               | 34  | 0.0411894  | 0.0625865 | 0.515027  | TwoSample_MR | Pyruvate      | MDD |
| Weighted mode             | 34  | 0.0256781  | 0.0357439 | 0.4775721 | TwoSample_MR | Pyruvate      | MDD |
| MR Egger                  | 83  | -0.011988  | 0.0150033 | 0.4266141 | TwoSample_MR | S_HDL_C_pct   | MDD |
| Weighted median           | 83  | -0.0104092 | 0.0165662 | 0.5297838 | TwoSample_MR | S_HDL_C_pct   | MDD |
| Inverse variance weighted | 83  | -0.0193174 | 0.0104158 | 0.0636513 | TwoSample_MR | S_HDL_C_pct   | MDD |
| Simple mode               | 83  | -0.0071713 | 0.0282667 | 0.8003613 | TwoSample_MR | S_HDL_C_pct   | MDD |
| Weighted mode             | 83  | -0.0071713 | 0.0138072 | 0.604888  | TwoSample_MR | S_HDL_C_pct   | MDD |
| MR Egger                  | 86  | -0.0224947 | 0.015803  | 0.1583109 | TwoSample_MR | S_HDL_FC_pct  | MDD |
| Weighted median           | 86  | -0.0071355 | 0.0147474 | 0.628496  | TwoSample_MR | S_HDL_FC_pct  | MDD |
| Inverse variance weighted | 86  | -0.0291485 | 0.0111263 | 0.0087987 | TwoSample_MR | S_HDL_FC_pct  | MDD |
| Simple mode               | 86  | -0.0167821 | 0.0268894 | 0.5342242 | TwoSample_MR | S_HDL_FC_pct  | MDD |
| Weighted mode             | 86  | -0.0095608 | 0.0136382 | 0.4852001 | TwoSample_MR | S_HDL_FC_pct  | MDD |
| MR Egger                  | 118 | 0.0267287  | 0.0193284 | 0.169359  | TwoSample_MR | S_HDL_TG      | MDD |
| Weighted median           | 118 | 0.0257178  | 0.0160743 | 0.1096149 | TwoSample_MR | S_HDL_TG      | MDD |
| Inverse variance weighted | 118 | 0.0179925  | 0.012393  | 0.1465508 | TwoSample_MR | S_HDL_TG      | MDD |
| Simple mode               | 118 | 0.0116566  | 0.0282686 | 0.6808371 | TwoSample_MR | S_HDL_TG      | MDD |
| Weighted mode             | 118 | 0.0214114  | 0.0138817 | 0.1256727 | TwoSample_MR | S_HDL_TG      | MDD |
| MR Egger                  | 122 | 0.0215027  | 0.0187815 | 0.2545326 | TwoSample_MR | S_HDL_TG_pct  | MDD |
| Weighted median           | 122 | 0.0226386  | 0.0153204 | 0.1394957 | TwoSample_MR | S_HDL_TG_pct  | MDD |
| Inverse variance weighted | 122 | 0.0150337  | 0.0121121 | 0.2145255 | TwoSample_MR | S_HDL_TG_pct  | MDD |
| Simple mode               | 122 | 0.0122534  | 0.0262848 | 0.6419257 | TwoSample_MR | S_HDL_TG_pct  | MDD |
| Weighted mode             | 122 | 0.0155456  | 0.0136719 | 0.2577643 | TwoSample_MR | S_HDL_TG_pct  | MDD |
| MR Egger                  | 67  | -0.0289549 | 0.0220565 | 0.1938807 | TwoSample_MR | S_LDL_PL_pct  | MDD |
| Weighted median           | 67  | -0.019506  | 0.0178307 | 0.2739739 | TwoSample_MR | S_LDL_PL_pct  | MDD |
| Inverse variance weighted | 67  | -0.0239504 | 0.0144362 | 0.0971051 | TwoSample_MR | S_LDL_PL_pct  | MDD |
| Simple mode               | 67  | -0.015712  | 0.0326951 | 0.6324178 | TwoSample_MR | S_LDL_PL_pct  | MDD |
| Weighted mode             | 67  | -0.015712  | 0.0154375 | 0.3124985 | TwoSample_MR | S_LDL_PL_pct  | MDD |
| MR Egger                  | 106 | 0.0080347  | 0.0202459 | 0.6922888 | TwoSample_MR | S_LDL_TG      | MDD |
| Weighted median           | 106 | 0.0158125  | 0.0161041 | 0.3261543 | TwoSample_MR | S_LDL_TG      | MDD |
| Inverse variance weighted | 106 | 0.0126737  | 0.0128369 | 0.3235039 | TwoSample_MR | S_LDL_TG      | MDD |
| Simple mode               | 106 | 0.0082239  | 0.0273829 | 0.76452   | TwoSample_MR | S_LDL_TG      | MDD |
| Weighted mode             | 106 | 0.0110907  | 0.0143287 | 0.4406578 | TwoSample_MR | S_LDL_TG      | MDD |
| MR Egger                  | 105 | 0.0190286  | 0.0167899 | 0.259704  | TwoSample_MR | S_LDL_TG_pct  | MDD |
| Weighted median           | 105 | 0.0212991  | 0.0141736 | 0.132909  | TwoSample_MR | S_LDL_TG_pct  | MDD |
| Inverse variance weighted | 105 | 0.0325052  | 0.0119005 | 0.0063064 | TwoSample_MR | S_LDL_TG_pct  | MDD |
| Simple mode               | 105 | 0.0059349  | 0.0270952 | 0.8270488 | TwoSample_MR | S_LDL_TG_pct  | MDD |
| Weighted mode             | 105 | 0.0187737  | 0.0130651 | 0.15374   | TwoSample_MR | S_LDL_TG_pct  | MDD |
| MR Egger                  | 82  | -0.0355609 | 0.0164624 | 0.0337557 | TwoSample_MR | S_VLDL_C_pct  | MDD |
| Weighted median           | 82  | -0.0243364 | 0.0162838 | 0.1350412 | TwoSample_MR | S_VLDL_C_pct  | MDD |
| Inverse variance weighted | 82  | -0.0346982 | 0.0112834 | 0.0021039 | TwoSample_MR | S_VLDL_C_pct  | MDD |



|                           |     |            |           |           |              |                |     |
|---------------------------|-----|------------|-----------|-----------|--------------|----------------|-----|
| Simple mode               | 82  | -0.0220758 | 0.0278215 | 0.4298163 | TwoSample_MR | S_VLDL_C_pct   | MDD |
| Weighted mode             | 82  | -0.0243177 | 0.0153877 | 0.1179286 | TwoSample_MR | S_VLDL_C_pct   | MDD |
| MR Egger                  | 93  | -0.0323258 | 0.0177739 | 0.0722429 | TwoSample_MR | S_VLDL_FC_pct  | MDD |
| Weighted median           | 93  | -0.0229728 | 0.0162979 | 0.1586692 | TwoSample_MR | S_VLDL_FC_pct  | MDD |
| Inverse variance weighted | 93  | -0.0403614 | 0.0123859 | 0.0011193 | TwoSample_MR | S_VLDL_FC_pct  | MDD |
| Simple mode               | 93  | -0.0092248 | 0.0300022 | 0.7593325 | TwoSample_MR | S_VLDL_FC_pct  | MDD |
| Weighted mode             | 93  | -0.0233141 | 0.0143235 | 0.107012  | TwoSample_MR | S_VLDL_FC_pct  | MDD |
| MR Egger                  | 95  | 0.004342   | 0.0242828 | 0.858477  | TwoSample_MR | S_VLDL_L       | MDD |
| Weighted median           | 95  | 0.0118603  | 0.0164243 | 0.4702212 | TwoSample_MR | S_VLDL_L       | MDD |
| Inverse variance weighted | 95  | -0.0049254 | 0.0138356 | 0.7218425 | TwoSample_MR | S_VLDL_L       | MDD |
| Simple mode               | 95  | 0.0019504  | 0.0270469 | 0.9426661 | TwoSample_MR | S_VLDL_L       | MDD |
| Weighted mode             | 95  | 0.0019504  | 0.0156645 | 0.9011763 | TwoSample_MR | S_VLDL_L       | MDD |
| MR Egger                  | 97  | -0.0347647 | 0.0169291 | 0.0427675 | TwoSample_MR | S_VLDL_PL_pct  | MDD |
| Weighted median           | 97  | -0.0221606 | 0.0155577 | 0.1543272 | TwoSample_MR | S_VLDL_PL_pct  | MDD |
| Inverse variance weighted | 97  | -0.0377122 | 0.0118804 | 0.0015018 | TwoSample_MR | S_VLDL_PL_pct  | MDD |
| Simple mode               | 97  | -0.034759  | 0.0299416 | 0.2485642 | TwoSample_MR | S_VLDL_PL_pct  | MDD |
| Weighted mode             | 97  | -0.0231759 | 0.0143194 | 0.1088374 | TwoSample_MR | S_VLDL_PL_pct  | MDD |
| MR Egger                  | 100 | 0.0064214  | 0.0221198 | 0.7721979 | TwoSample_MR | S_VLDL_P       | MDD |
| Weighted median           | 100 | 0.0115647  | 0.0172118 | 0.5016454 | TwoSample_MR | S_VLDL_P       | MDD |
| Inverse variance weighted | 100 | -0.0052812 | 0.0128628 | 0.6813797 | TwoSample_MR | S_VLDL_P       | MDD |
| Simple mode               | 100 | -0.0000177 | 0.0276454 | 0.9994895 | TwoSample_MR | S_VLDL_P       | MDD |
| Weighted mode             | 100 | 0.0060504  | 0.0160523 | 0.7070416 | TwoSample_MR | S_VLDL_P       | MDD |
| MR Egger                  | 108 | 0.0107474  | 0.018164  | 0.5553197 | TwoSample_MR | S_VLDL_TG      | MDD |
| Weighted median           | 108 | 0.0233708  | 0.0165843 | 0.1587739 | TwoSample_MR | S_VLDL_TG      | MDD |
| Inverse variance weighted | 108 | 0.0226772  | 0.011752  | 0.0536499 | TwoSample_MR | S_VLDL_TG      | MDD |
| Simple mode               | 108 | 0.014005   | 0.0280592 | 0.6187164 | TwoSample_MR | S_VLDL_TG      | MDD |
| Weighted mode             | 108 | 0.0192441  | 0.0147509 | 0.1948261 | TwoSample_MR | S_VLDL_TG      | MDD |
| MR Egger                  | 94  | 0.0316379  | 0.0153259 | 0.0417998 | TwoSample_MR | S_VLDL_TG_pct  | MDD |
| Weighted median           | 94  | 0.0233712  | 0.0159763 | 0.1435029 | TwoSample_MR | S_VLDL_TG_pct  | MDD |
| Inverse variance weighted | 94  | 0.0348882  | 0.0106754 | 0.0010828 | TwoSample_MR | S_VLDL_TG_pct  | MDD |
| Simple mode               | 94  | 0.0164613  | 0.0305565 | 0.5913696 | TwoSample_MR | S_VLDL_TG_pct  | MDD |
| Weighted mode             | 94  | 0.0237257  | 0.014532  | 0.105923  | TwoSample_MR | S_VLDL_TG_pct  | MDD |
| MR Egger                  | 83  | -0.0472279 | 0.0212265 | 0.0288656 | TwoSample_MR | Sphingomyelins | MDD |
| Weighted median           | 83  | -0.0141809 | 0.0196336 | 0.4701237 | TwoSample_MR | Sphingomyelins | MDD |
| Inverse variance weighted | 83  | -0.02255   | 0.0139601 | 0.1062431 | TwoSample_MR | Sphingomyelins | MDD |
| Simple mode               | 83  | -0.0139508 | 0.0367298 | 0.7050598 | TwoSample_MR | Sphingomyelins | MDD |
| Weighted mode             | 83  | -0.0166067 | 0.0173182 | 0.3404212 | TwoSample_MR | Sphingomyelins | MDD |
| MR Egger                  | 125 | 0.0149048  | 0.0209578 | 0.4783167 | TwoSample_MR | TG_by_PG       | MDD |
| Weighted median           | 125 | 0.0271254  | 0.0165631 | 0.1014828 | TwoSample_MR | TG_by_PG       | MDD |
| Inverse variance weighted | 125 | 0.0225461  | 0.0133453 | 0.0911344 | TwoSample_MR | TG_by_PG       | MDD |
| Simple mode               | 125 | 0.0240462  | 0.0294958 | 0.416497  | TwoSample_MR | TG_by_PG       | MDD |
| Weighted mode             | 125 | 0.0240462  | 0.016356  | 0.1440466 | TwoSample_MR | TG_by_PG       | MDD |
| MR Egger                  | 77  | -0.0374434 | 0.0231229 | 0.1095767 | TwoSample_MR | Total_CE       | MDD |
| Weighted median           | 77  | -0.0168026 | 0.0194826 | 0.3884456 | TwoSample_MR | Total_CE       | MDD |
| Inverse variance weighted | 77  | -0.0143856 | 0.015189  | 0.3435862 | TwoSample_MR | Total_CE       | MDD |
| Simple mode               | 77  | -0.0165898 | 0.0361859 | 0.6479302 | TwoSample_MR | Total_CE       | MDD |
| Weighted mode             | 77  | -0.0165898 | 0.0177059 | 0.3517459 | TwoSample_MR | Total_CE       | MDD |
| MR Egger                  | 85  | 0.0224403  | 0.0319779 | 0.4848025 | TwoSample_MR | Total_P        | MDD |
| Weighted median           | 85  | 0.0119775  | 0.0231666 | 0.6051446 | TwoSample_MR | Total_P        | MDD |
| Inverse variance weighted | 85  | 0.0200544  | 0.017438  | 0.2501265 | TwoSample_MR | Total_P        | MDD |
| Simple mode               | 85  | -0.0054625 | 0.0395833 | 0.8905703 | TwoSample_MR | Total_P        | MDD |
| Weighted mode             | 85  | 0.0043885  | 0.0227165 | 0.8472792 | TwoSample_MR | Total_P        | MDD |
| MR Egger                  | 105 | 0.0011506  | 0.0200552 | 0.9543597 | TwoSample_MR | Total_TG       | MDD |
| Weighted median           | 105 | 0.0248485  | 0.0177665 | 0.1619287 | TwoSample_MR | Total_TG       | MDD |
| Inverse variance weighted | 105 | 0.0221601  | 0.0129814 | 0.0878108 | TwoSample_MR | Total_TG       | MDD |
| Simple mode               | 105 | 0.0027735  | 0.0301512 | 0.9268847 | TwoSample_MR | Total_TG       | MDD |
| Weighted mode             | 105 | 0.0188574  | 0.0156677 | 0.2314842 | TwoSample_MR | Total_TG       | MDD |
| MR Egger                  | 70  | -0.062081  | 0.0173227 | 0.0006319 | TwoSample_MR | Unsaturation   | MDD |
| Weighted median           | 70  | -0.0455214 | 0.0146321 | 0.0018641 | TwoSample_MR | Unsaturation   | MDD |
| Inverse variance weighted | 70  | -0.0413277 | 0.0131343 | 0.0016521 | TwoSample_MR | Unsaturation   | MDD |
| Simple mode               | 70  | -0.0745106 | 0.0382092 | 0.0552321 | TwoSample_MR | Unsaturation   | MDD |
| Weighted mode             | 70  | -0.0505906 | 0.0133715 | 0.0003259 | TwoSample_MR | Unsaturation   | MDD |

|                           |     |            |           |           |              |               |     |
|---------------------------|-----|------------|-----------|-----------|--------------|---------------|-----|
| MR Egger                  | 86  | 0.0109256  | 0.02622   | 0.6779688 | TwoSample_MR | VLDL_FC       | MDD |
| Weighted median           | 86  | 0.0037609  | 0.017913  | 0.8337052 | TwoSample_MR | VLDL_FC       | MDD |
| Inverse variance weighted | 86  | -0.0095826 | 0.0148097 | 0.5175994 | TwoSample_MR | VLDL_FC       | MDD |
| Simple mode               | 86  | -0.0009255 | 0.0349221 | 0.9789192 | TwoSample_MR | VLDL_FC       | MDD |
| Weighted mode             | 86  | 0.0080622  | 0.0198818 | 0.6861223 | TwoSample_MR | VLDL_FC       | MDD |
| MR Egger                  | 88  | 0.0148878  | 0.0210775 | 0.4818887 | TwoSample_MR | VLDL_L        | MDD |
| Weighted median           | 88  | 0.0154725  | 0.0183709 | 0.3996594 | TwoSample_MR | VLDL_L        | MDD |
| Inverse variance weighted | 88  | 0.0031596  | 0.0130854 | 0.8091975 | TwoSample_MR | VLDL_L        | MDD |
| Simple mode               | 88  | 0.0018194  | 0.0345637 | 0.9581403 | TwoSample_MR | VLDL_L        | MDD |
| Weighted mode             | 88  | 0.0168775  | 0.0181776 | 0.3557285 | TwoSample_MR | VLDL_L        | MDD |
| MR Egger                  | 88  | 0.0109842  | 0.0235726 | 0.6424112 | TwoSample_MR | VLDL_PL       | MDD |
| Weighted median           | 88  | 0.0154309  | 0.0185464 | 0.4053985 | TwoSample_MR | VLDL_PL       | MDD |
| Inverse variance weighted | 88  | -0.0047051 | 0.0136794 | 0.7308777 | TwoSample_MR | VLDL_PL       | MDD |
| Simple mode               | 88  | 0.0032921  | 0.0328589 | 0.920424  | TwoSample_MR | VLDL_PL       | MDD |
| Weighted mode             | 88  | 0.0124512  | 0.0188823 | 0.5113739 | TwoSample_MR | VLDL_PL       | MDD |
| MR Egger                  | 104 | 0.0036897  | 0.0196477 | 0.8514134 | TwoSample_MR | VLDL_TG       | MDD |
| Weighted median           | 104 | 0.0245402  | 0.0169368 | 0.1473566 | TwoSample_MR | VLDL_TG       | MDD |
| Inverse variance weighted | 104 | 0.0212492  | 0.0128779 | 0.0989311 | TwoSample_MR | VLDL_TG       | MDD |
| Simple mode               | 104 | -0.0019564 | 0.0319509 | 0.9512942 | TwoSample_MR | VLDL_TG       | MDD |
| Weighted mode             | 104 | 0.0173703  | 0.0160012 | 0.2802058 | TwoSample_MR | VLDL_TG       | MDD |
| MR Egger                  | 112 | 0.0233491  | 0.0200274 | 0.2461948 | TwoSample_MR | VLDL_size     | MDD |
| Weighted median           | 112 | 0.0269206  | 0.0157131 | 0.0866644 | TwoSample_MR | VLDL_size     | MDD |
| Inverse variance weighted | 112 | 0.0285317  | 0.0128963 | 0.0269391 | TwoSample_MR | VLDL_size     | MDD |
| Simple mode               | 112 | 0.0350074  | 0.0282274 | 0.2175197 | TwoSample_MR | VLDL_size     | MDD |
| Weighted mode             | 112 | 0.0229642  | 0.0140509 | 0.1050162 | TwoSample_MR | VLDL_size     | MDD |
| MR Egger                  | 125 | -0.0258219 | 0.0177102 | 0.1473811 | TwoSample_MR | XL_HDL_CE     | MDD |
| Weighted median           | 125 | -0.0224752 | 0.0163214 | 0.1685008 | TwoSample_MR | XL_HDL_CE     | MDD |
| Inverse variance weighted | 125 | -0.0214417 | 0.0116975 | 0.0667997 | TwoSample_MR | XL_HDL_CE     | MDD |
| Simple mode               | 125 | -0.0096126 | 0.0324045 | 0.7672352 | TwoSample_MR | XL_HDL_CE     | MDD |
| Weighted mode             | 125 | -0.0129378 | 0.0138208 | 0.3510387 | TwoSample_MR | XL_HDL_CE     | MDD |
| MR Egger                  | 123 | -0.0216267 | 0.0186156 | 0.2476244 | TwoSample_MR | XL_HDL_C      | MDD |
| Weighted median           | 123 | -0.0212845 | 0.0158075 | 0.1781467 | TwoSample_MR | XL_HDL_C      | MDD |
| Inverse variance weighted | 123 | -0.0250782 | 0.0123511 | 0.0423108 | TwoSample_MR | XL_HDL_C      | MDD |
| Simple mode               | 123 | -0.0010005 | 0.0344986 | 0.9769118 | TwoSample_MR | XL_HDL_C      | MDD |
| Weighted mode             | 123 | -0.0150033 | 0.0138207 | 0.279812  | TwoSample_MR | XL_HDL_C      | MDD |
| MR Egger                  | 108 | -0.0372449 | 0.0176394 | 0.037083  | TwoSample_MR | XL_HDL_FC     | MDD |
| Weighted median           | 108 | -0.0199503 | 0.014842  | 0.1788904 | TwoSample_MR | XL_HDL_FC     | MDD |
| Inverse variance weighted | 108 | -0.0270991 | 0.0119252 | 0.0230602 | TwoSample_MR | XL_HDL_FC     | MDD |
| Simple mode               | 108 | -0.0141622 | 0.0318431 | 0.6573988 | TwoSample_MR | XL_HDL_FC     | MDD |
| Weighted mode             | 108 | -0.0174225 | 0.0132744 | 0.1921639 | TwoSample_MR | XL_HDL_FC     | MDD |
| MR Egger                  | 124 | 0.0174196  | 0.0200997 | 0.3878297 | TwoSample_MR | XL_HDL_FC_pct | MDD |
| Weighted median           | 124 | 0.0106759  | 0.0176023 | 0.5441771 | TwoSample_MR | XL_HDL_FC_pct | MDD |
| Inverse variance weighted | 124 | 0.0015434  | 0.0135594 | 0.9093749 | TwoSample_MR | XL_HDL_FC_pct | MDD |
| Simple mode               | 124 | 0.0083835  | 0.034675  | 0.8093589 | TwoSample_MR | XL_HDL_FC_pct | MDD |
| Weighted mode             | 124 | 0.0083835  | 0.0127687 | 0.5126893 | TwoSample_MR | XL_HDL_FC_pct | MDD |
| MR Egger                  | 112 | -0.0313695 | 0.0191386 | 0.1040554 | TwoSample_MR | XL_HDL_L      | MDD |
| Weighted median           | 112 | -0.0090027 | 0.0163792 | 0.5825655 | TwoSample_MR | XL_HDL_L      | MDD |
| Inverse variance weighted | 112 | -0.0183178 | 0.0128211 | 0.1530842 | TwoSample_MR | XL_HDL_L      | MDD |
| Simple mode               | 112 | -0.0041255 | 0.0336555 | 0.9026606 | TwoSample_MR | XL_HDL_L      | MDD |
| Weighted mode             | 112 | -0.0079629 | 0.0143154 | 0.579163  | TwoSample_MR | XL_HDL_L      | MDD |
| MR Egger                  | 115 | -0.0274974 | 0.0196746 | 0.1649688 | TwoSample_MR | XL_HDL_PL     | MDD |
| Weighted median           | 115 | -0.0078928 | 0.0160883 | 0.623713  | TwoSample_MR | XL_HDL_PL     | MDD |
| Inverse variance weighted | 115 | -0.0165251 | 0.0131536 | 0.209     | TwoSample_MR | XL_HDL_PL     | MDD |
| Simple mode               | 115 | -0.0139491 | 0.0334528 | 0.6774791 | TwoSample_MR | XL_HDL_PL     | MDD |
| Weighted mode             | 115 | -0.0100441 | 0.0137357 | 0.4661309 | TwoSample_MR | XL_HDL_PL     | MDD |
| MR Egger                  | 104 | -0.0261341 | 0.018954  | 0.1709666 | TwoSample_MR | XL_HDL_P      | MDD |
| Weighted median           | 104 | -0.0078447 | 0.0153219 | 0.6086566 | TwoSample_MR | XL_HDL_P      | MDD |
| Inverse variance weighted | 104 | -0.0135984 | 0.012902  | 0.2918921 | TwoSample_MR | XL_HDL_P      | MDD |
| Simple mode               | 104 | 0.0010275  | 0.0321419 | 0.9745591 | TwoSample_MR | XL_HDL_P      | MDD |
| Weighted mode             | 104 | -0.0054466 | 0.0129385 | 0.674662  | TwoSample_MR | XL_HDL_P      | MDD |
| MR Egger                  | 120 | 0.0272115  | 0.0195647 | 0.1668888 | TwoSample_MR | XL_HDL_TG_pct | MDD |
| Weighted median           | 120 | 0.0263635  | 0.01535   | 0.0858898 | TwoSample_MR | XL_HDL_TG_pct | MDD |

|                           |     |            |           |           |              |                |     |
|---------------------------|-----|------------|-----------|-----------|--------------|----------------|-----|
| Inverse variance weighted | 120 | 0.0294454  | 0.0126257 | 0.0196916 | TwoSample_MR | XL_HDL_TG_pct  | MDD |
| Simple mode               | 120 | 0.0190348  | 0.0273797 | 0.4882744 | TwoSample_MR | XL_HDL_TG_pct  | MDD |
| Weighted mode             | 120 | 0.0256673  | 0.0137789 | 0.0649571 | TwoSample_MR | XL_HDL_TG_pct  | MDD |
| MR Egger                  | 89  | 0.0182226  | 0.0249495 | 0.4671201 | TwoSample_MR | XL_VLDL_CE     | MDD |
| Weighted median           | 89  | 0.0179159  | 0.0180506 | 0.3209356 | TwoSample_MR | XL_VLDL_CE     | MDD |
| Inverse variance weighted | 89  | 0.0021999  | 0.0145999 | 0.8802285 | TwoSample_MR | XL_VLDL_CE     | MDD |
| Simple mode               | 89  | 0.0187992  | 0.030926  | 0.5448353 | TwoSample_MR | XL_VLDL_CE     | MDD |
| Weighted mode             | 89  | 0.0123278  | 0.0178699 | 0.4920951 | TwoSample_MR | XL_VLDL_CE     | MDD |
| MR Egger                  | 104 | -0.0268953 | 0.0227304 | 0.2394691 | TwoSample_MR | XL_VLDL_CE_pct | MDD |
| Weighted median           | 104 | -0.0224657 | 0.0174898 | 0.1989667 | TwoSample_MR | XL_VLDL_CE_pct | MDD |
| Inverse variance weighted | 104 | -0.0520808 | 0.0150888 | 0.0005572 | TwoSample_MR | XL_VLDL_CE_pct | MDD |
| Simple mode               | 104 | -0.0223298 | 0.0317615 | 0.4836138 | TwoSample_MR | XL_VLDL_CE_pct | MDD |
| Weighted mode             | 104 | -0.0223298 | 0.0160226 | 0.166426  | TwoSample_MR | XL_VLDL_CE_pct | MDD |
| MR Egger                  | 86  | 0.0162039  | 0.0222618 | 0.4687111 | TwoSample_MR | XL_VLDL_C      | MDD |
| Weighted median           | 86  | 0.0147959  | 0.0178966 | 0.408381  | TwoSample_MR | XL_VLDL_C      | MDD |
| Inverse variance weighted | 86  | 0.0052224  | 0.0136658 | 0.7023494 | TwoSample_MR | XL_VLDL_C      | MDD |
| Simple mode               | 86  | -0.0001254 | 0.0317951 | 0.9968624 | TwoSample_MR | XL_VLDL_C      | MDD |
| Weighted mode             | 86  | 0.014207   | 0.0175095 | 0.4194111 | TwoSample_MR | XL_VLDL_C      | MDD |
| MR Egger                  | 104 | -0.0352693 | 0.0226163 | 0.1219843 | TwoSample_MR | XL_VLDL_C_pct  | MDD |
| Weighted median           | 104 | -0.0230675 | 0.0182748 | 0.2068548 | TwoSample_MR | XL_VLDL_C_pct  | MDD |
| Inverse variance weighted | 104 | -0.0509857 | 0.0144565 | 0.0004205 | TwoSample_MR | XL_VLDL_C_pct  | MDD |
| Simple mode               | 104 | -0.0016744 | 0.0314194 | 0.9576036 | TwoSample_MR | XL_VLDL_C_pct  | MDD |
| Weighted mode             | 104 | -0.0249079 | 0.0159768 | 0.1220612 | TwoSample_MR | XL_VLDL_C_pct  | MDD |
| MR Egger                  | 92  | 0.0151564  | 0.0205688 | 0.4631227 | TwoSample_MR | XL_VLDL_FC     | MDD |
| Weighted median           | 92  | 0.0177663  | 0.0178464 | 0.3194875 | TwoSample_MR | XL_VLDL_FC     | MDD |
| Inverse variance weighted | 92  | 0.0060255  | 0.0130799 | 0.6450369 | TwoSample_MR | XL_VLDL_FC     | MDD |
| Simple mode               | 92  | 0.0035345  | 0.0293889 | 0.904538  | TwoSample_MR | XL_VLDL_FC     | MDD |
| Weighted mode             | 92  | 0.0167799  | 0.0170081 | 0.3264645 | TwoSample_MR | XL_VLDL_FC     | MDD |
| MR Egger                  | 84  | -0.0515638 | 0.0249063 | 0.0415697 | TwoSample_MR | XL_VLDL_FC_pct | MDD |
| Weighted median           | 84  | -0.0424769 | 0.0188883 | 0.0245221 | TwoSample_MR | XL_VLDL_FC_pct | MDD |
| Inverse variance weighted | 84  | -0.0641181 | 0.014209  | 0.0000064 | TwoSample_MR | XL_VLDL_FC_pct | MDD |
| Simple mode               | 84  | -0.0150902 | 0.0337268 | 0.6557333 | TwoSample_MR | XL_VLDL_FC_pct | MDD |
| Weighted mode             | 84  | -0.0363472 | 0.0203285 | 0.0774278 | TwoSample_MR | XL_VLDL_FC_pct | MDD |
| MR Egger                  | 109 | 0.0203471  | 0.019998  | 0.3112321 | TwoSample_MR | XL_VLDL_L      | MDD |
| Weighted median           | 109 | 0.0256466  | 0.0174947 | 0.1426569 | TwoSample_MR | XL_VLDL_L      | MDD |
| Inverse variance weighted | 109 | 0.0148945  | 0.0127523 | 0.2428133 | TwoSample_MR | XL_VLDL_L      | MDD |
| Simple mode               | 109 | 0.0107158  | 0.0304498 | 0.7255878 | TwoSample_MR | XL_VLDL_L      | MDD |
| Weighted mode             | 109 | 0.0217228  | 0.0166669 | 0.1952275 | TwoSample_MR | XL_VLDL_L      | MDD |
| MR Egger                  | 97  | 0.0211908  | 0.0205129 | 0.3042055 | TwoSample_MR | XL_VLDL_PL     | MDD |
| Weighted median           | 97  | 0.0201169  | 0.0164257 | 0.2206798 | TwoSample_MR | XL_VLDL_PL     | MDD |
| Inverse variance weighted | 97  | 0.0073677  | 0.012999  | 0.5708576 | TwoSample_MR | XL_VLDL_PL     | MDD |
| Simple mode               | 97  | 0.0077157  | 0.0301372 | 0.7984829 | TwoSample_MR | XL_VLDL_PL     | MDD |
| Weighted mode             | 97  | 0.0155985  | 0.0159792 | 0.3314323 | TwoSample_MR | XL_VLDL_PL     | MDD |
| MR Egger                  | 107 | 0.0155397  | 0.0206083 | 0.4525086 | TwoSample_MR | XL_VLDL_P      | MDD |
| Weighted median           | 107 | 0.0261396  | 0.0173263 | 0.1313843 | TwoSample_MR | XL_VLDL_P      | MDD |
| Inverse variance weighted | 107 | 0.016159   | 0.0130834 | 0.2168019 | TwoSample_MR | XL_VLDL_P      | MDD |
| Simple mode               | 107 | 0.0118532  | 0.029975  | 0.6933153 | TwoSample_MR | XL_VLDL_P      | MDD |
| Weighted mode             | 107 | 0.020091   | 0.0158611 | 0.2080453 | TwoSample_MR | XL_VLDL_P      | MDD |
| MR Egger                  | 110 | 0.0150334  | 0.0201574 | 0.4574067 | TwoSample_MR | XL_VLDL_TG     | MDD |
| Weighted median           | 110 | 0.0267804  | 0.0175964 | 0.1280273 | TwoSample_MR | XL_VLDL_TG     | MDD |
| Inverse variance weighted | 110 | 0.0230817  | 0.012926  | 0.0741511 | TwoSample_MR | XL_VLDL_TG     | MDD |
| Simple mode               | 110 | 0.0224557  | 0.0309605 | 0.4698211 | TwoSample_MR | XL_VLDL_TG     | MDD |
| Weighted mode             | 110 | 0.0224557  | 0.0152141 | 0.1428333 | TwoSample_MR | XL_VLDL_TG     | MDD |
| MR Egger                  | 87  | 0.0342148  | 0.0224542 | 0.1312821 | TwoSample_MR | XL_VLDL_TG_pct | MDD |
| Weighted median           | 87  | 0.02787    | 0.0183334 | 0.1284676 | TwoSample_MR | XL_VLDL_TG_pct | MDD |
| Inverse variance weighted | 87  | 0.0496514  | 0.0140745 | 0.0004191 | TwoSample_MR | XL_VLDL_TG_pct | MDD |
| Simple mode               | 87  | 0.0061838  | 0.0315714 | 0.845175  | TwoSample_MR | XL_VLDL_TG_pct | MDD |
| Weighted mode             | 87  | 0.025717   | 0.0171276 | 0.1368916 | TwoSample_MR | XL_VLDL_TG_pct | MDD |
| MR Egger                  | 107 | -0.0406966 | 0.0188497 | 0.0331269 | TwoSample_MR | XS_VLDL_CE_pct | MDD |
| Weighted median           | 107 | -0.0255595 | 0.0150374 | 0.0891805 | TwoSample_MR | XS_VLDL_CE_pct | MDD |
| Inverse variance weighted | 107 | -0.0397608 | 0.0128305 | 0.0019422 | TwoSample_MR | XS_VLDL_CE_pct | MDD |
| Simple mode               | 107 | -0.0193852 | 0.0281017 | 0.4918129 | TwoSample_MR | XS_VLDL_CE_pct | MDD |

|                           |     |            |           |           |              |                 |     |
|---------------------------|-----|------------|-----------|-----------|--------------|-----------------|-----|
| Weighted mode             | 107 | -0.0286721 | 0.0140637 | 0.0439652 | TwoSample_MR | XS_VLDL_CE_pct  | MDD |
| MR Egger                  | 104 | -0.0393302 | 0.0184812 | 0.035737  | TwoSample_MR | XS_VLDL_C_pct   | MDD |
| Weighted median           | 104 | -0.026021  | 0.0152782 | 0.0885422 | TwoSample_MR | XS_VLDL_C_pct   | MDD |
| Inverse variance weighted | 104 | -0.0429616 | 0.0125419 | 0.0006138 | TwoSample_MR | XS_VLDL_C_pct   | MDD |
| Simple mode               | 104 | -0.0261104 | 0.0276115 | 0.3465478 | TwoSample_MR | XS_VLDL_C_pct   | MDD |
| Weighted mode             | 104 | -0.0291609 | 0.013806  | 0.0370873 | TwoSample_MR | XS_VLDL_C_pct   | MDD |
| MR Egger                  | 74  | -0.0399918 | 0.0201761 | 0.0512809 | TwoSample_MR | XS_VLDL_FC_pct  | MDD |
| Weighted median           | 74  | -0.0300172 | 0.0183401 | 0.1016947 | TwoSample_MR | XS_VLDL_FC_pct  | MDD |
| Inverse variance weighted | 74  | -0.0428325 | 0.0128432 | 0.0008529 | TwoSample_MR | XS_VLDL_FC_pct  | MDD |
| Simple mode               | 74  | -0.0034398 | 0.0376923 | 0.927535  | TwoSample_MR | XS_VLDL_FC_pct  | MDD |
| Weighted mode             | 74  | -0.0202358 | 0.0191329 | 0.2937057 | TwoSample_MR | XS_VLDL_FC_pct  | MDD |
| MR Egger                  | 87  | 0.0115073  | 0.0232255 | 0.6215537 | TwoSample_MR | XS_VLDL_PL_pct  | MDD |
| Weighted median           | 87  | 0.016978   | 0.0207707 | 0.4136988 | TwoSample_MR | XS_VLDL_PL_pct  | MDD |
| Inverse variance weighted | 87  | 0.0086214  | 0.0137753 | 0.5314067 | TwoSample_MR | XS_VLDL_PL_pct  | MDD |
| Simple mode               | 87  | 0.0033564  | 0.0351345 | 0.9241168 | TwoSample_MR | XS_VLDL_PL_pct  | MDD |
| Weighted mode             | 87  | 0.0059667  | 0.0201968 | 0.7683778 | TwoSample_MR | XS_VLDL_PL_pct  | MDD |
| MR Egger                  | 109 | 0.00428    | 0.0163011 | 0.7933935 | TwoSample_MR | XS_VLDL_TG      | MDD |
| Weighted median           | 109 | -0.00662   | 0.0155188 | 0.6696839 | TwoSample_MR | XS_VLDL_TG      | MDD |
| Inverse variance weighted | 109 | 0.0028886  | 0.0110269 | 0.7933538 | TwoSample_MR | XS_VLDL_TG      | MDD |
| Simple mode               | 109 | 0.0083506  | 0.0295226 | 0.7778304 | TwoSample_MR | XS_VLDL_TG      | MDD |
| Weighted mode             | 109 | 0.0022859  | 0.0119744 | 0.848966  | TwoSample_MR | XS_VLDL_TG      | MDD |
| MR Egger                  | 101 | 0.0339355  | 0.0167724 | 0.0457385 | TwoSample_MR | XS_VLDL_TG_pct  | MDD |
| Weighted median           | 101 | 0.0266839  | 0.0152929 | 0.0810086 | TwoSample_MR | XS_VLDL_TG_pct  | MDD |
| Inverse variance weighted | 101 | 0.0422961  | 0.0114302 | 0.0002153 | TwoSample_MR | XS_VLDL_TG_pct  | MDD |
| Simple mode               | 101 | 0.0126629  | 0.0295227 | 0.6689029 | TwoSample_MR | XS_VLDL_TG_pct  | MDD |
| Weighted mode             | 101 | 0.0239563  | 0.0139547 | 0.0891261 | TwoSample_MR | XS_VLDL_TG_pct  | MDD |
| MR Egger                  | 96  | 0.0177861  | 0.0204509 | 0.386681  | TwoSample_MR | XXL_VLDL_CE     | MDD |
| Weighted median           | 96  | 0.025252   | 0.0164475 | 0.124707  | TwoSample_MR | XXL_VLDL_CE     | MDD |
| Inverse variance weighted | 96  | 0.0166384  | 0.0134445 | 0.215878  | TwoSample_MR | XXL_VLDL_CE     | MDD |
| Simple mode               | 96  | 0.007611   | 0.0290326 | 0.7937709 | TwoSample_MR | XXL_VLDL_CE     | MDD |
| Weighted mode             | 96  | 0.0182457  | 0.015313  | 0.236418  | TwoSample_MR | XXL_VLDL_CE     | MDD |
| MR Egger                  | 101 | 0.0160804  | 0.0188308 | 0.3951987 | TwoSample_MR | XXL_VLDL_C      | MDD |
| Weighted median           | 101 | 0.0249782  | 0.0164189 | 0.1281833 | TwoSample_MR | XXL_VLDL_C      | MDD |
| Inverse variance weighted | 101 | 0.0175507  | 0.0125648 | 0.162468  | TwoSample_MR | XXL_VLDL_C      | MDD |
| Simple mode               | 101 | 0.0134782  | 0.0290968 | 0.6442133 | TwoSample_MR | XXL_VLDL_C      | MDD |
| Weighted mode             | 101 | 0.0187012  | 0.0153847 | 0.2270119 | TwoSample_MR | XXL_VLDL_C      | MDD |
| MR Egger                  | 101 | 0.0113039  | 0.0187807 | 0.548625  | TwoSample_MR | XXL_VLDL_FC     | MDD |
| Weighted median           | 101 | 0.0257062  | 0.0160894 | 0.1101073 | TwoSample_MR | XXL_VLDL_FC     | MDD |
| Inverse variance weighted | 101 | 0.0196468  | 0.0126773 | 0.1211985 | TwoSample_MR | XXL_VLDL_FC     | MDD |
| Simple mode               | 101 | 0.0139467  | 0.030201  | 0.6452292 | TwoSample_MR | XXL_VLDL_FC     | MDD |
| Weighted mode             | 101 | 0.0197006  | 0.0143766 | 0.1736541 | TwoSample_MR | XXL_VLDL_FC     | MDD |
| MR Egger                  | 99  | 0.0204762  | 0.0196222 | 0.2993009 | TwoSample_MR | XXL_VLDL_L      | MDD |
| Weighted median           | 99  | 0.0288657  | 0.0167932 | 0.0856338 | TwoSample_MR | XXL_VLDL_L      | MDD |
| Inverse variance weighted | 99  | 0.0128918  | 0.013048  | 0.3231397 | TwoSample_MR | XXL_VLDL_L      | MDD |
| Simple mode               | 99  | 0.0170567  | 0.0299807 | 0.5707099 | TwoSample_MR | XXL_VLDL_L      | MDD |
| Weighted mode             | 99  | 0.0170567  | 0.0164089 | 0.3011383 | TwoSample_MR | XXL_VLDL_L      | MDD |
| MR Egger                  | 102 | 0.0070633  | 0.0194923 | 0.7178437 | TwoSample_MR | XXL_VLDL_PL     | MDD |
| Weighted median           | 102 | 0.0257775  | 0.0158504 | 0.1038856 | TwoSample_MR | XXL_VLDL_PL     | MDD |
| Inverse variance weighted | 102 | 0.0190974  | 0.0130256 | 0.1426096 | TwoSample_MR | XXL_VLDL_PL     | MDD |
| Simple mode               | 102 | 0.0175906  | 0.0278363 | 0.5288596 | TwoSample_MR | XXL_VLDL_PL     | MDD |
| Weighted mode             | 102 | 0.0207415  | 0.0158813 | 0.1945082 | TwoSample_MR | XXL_VLDL_PL     | MDD |
| MR Egger                  | 56  | -0.0065204 | 0.0190132 | 0.7329734 | TwoSample_MR | XXL_VLDL_PL_pct | MDD |
| Weighted median           | 56  | -0.0193634 | 0.0169925 | 0.2544824 | TwoSample_MR | XXL_VLDL_PL_pct | MDD |
| Inverse variance weighted | 56  | 0.0067425  | 0.0124161 | 0.5871003 | TwoSample_MR | XXL_VLDL_PL_pct | MDD |
| Simple mode               | 56  | -0.0163518 | 0.0309439 | 0.5993237 | TwoSample_MR | XXL_VLDL_PL_pct | MDD |
| Weighted mode             | 56  | -0.0047181 | 0.0146063 | 0.7479056 | TwoSample_MR | XXL_VLDL_PL_pct | MDD |
| MR Egger                  | 98  | 0.0127021  | 0.0194588 | 0.5154655 | TwoSample_MR | XXL_VLDL_P      | MDD |
| Weighted median           | 98  | 0.02396    | 0.0167838 | 0.1534182 | TwoSample_MR | XXL_VLDL_P      | MDD |
| Inverse variance weighted | 98  | 0.0165824  | 0.0129327 | 0.1997706 | TwoSample_MR | XXL_VLDL_P      | MDD |
| Simple mode               | 98  | 0.0117666  | 0.0294057 | 0.6899292 | TwoSample_MR | XXL_VLDL_P      | MDD |
| Weighted mode             | 98  | 0.0198659  | 0.0155383 | 0.2041182 | TwoSample_MR | XXL_VLDL_P      | MDD |
| MR Egger                  | 93  | 0.0144875  | 0.0179151 | 0.420812  | TwoSample_MR | XXL_VLDL_TG     | MDD |

|                           |    |           |           |           |              |             |     |
|---------------------------|----|-----------|-----------|-----------|--------------|-------------|-----|
| Weighted median           | 93 | 0.0069284 | 0.0174355 | 0.6910912 | TwoSample_MR | XXL_VLDL_TG | MDD |
| Inverse variance weighted | 93 | 0.0169425 | 0.0118567 | 0.1530216 | TwoSample_MR | XXL_VLDL_TG | MDD |
| Simple mode               | 93 | 0.0131409 | 0.0347605 | 0.7062697 | TwoSample_MR | XXL_VLDL_TG | MDD |
| Weighted mode             | 93 | 0.0185089 | 0.0158267 | 0.2452359 | TwoSample_MR | XXL_VLDL_TG | MDD |

**eTable 7. Results of horizontal pleiotropy in MR**

| analysis              | egger_intercept | se        | pval      | exposure      | outcome       |
|-----------------------|-----------------|-----------|-----------|---------------|---------------|
| Horizontal_pleiotropy | 0.0070856       | 0.002505  | 0.005593  | MDD           | XL_HDL_FC_pct |
| Horizontal_pleiotropy | -0.0064994      | 0.0025612 | 0.0126159 | MDD           | L_HDL_PL      |
| Horizontal_pleiotropy | -0.0065219      | 0.0026212 | 0.0143999 | MDD           | L_HDL_L       |
| Horizontal_pleiotropy | -0.0066615      | 0.0027098 | 0.0155799 | MDD           | L_HDL_CE      |
| Horizontal_pleiotropy | -0.0063312      | 0.002607  | 0.0168417 | MDD           | HDL_CE        |
| Horizontal_pleiotropy | -0.0065201      | 0.0026977 | 0.0173589 | MDD           | L_HDL_C       |
| Horizontal_pleiotropy | -0.0063398      | 0.0026431 | 0.0182064 | MDD           | HDL_size      |
| Horizontal_pleiotropy | -0.0063532      | 0.0026717 | 0.0191997 | MDD           | L_HDL_P       |
| Horizontal_pleiotropy | 0.006187        | 0.0026024 | 0.0192292 | MDD           | L_VLDL_TG     |
| Horizontal_pleiotropy | -0.0059683      | 0.0025296 | 0.0201362 | MDD           | M_HDL_CE      |
| Horizontal_pleiotropy | -0.0061446      | 0.0026123 | 0.0205101 | MDD           | HDL_C         |
| Horizontal_pleiotropy | 0.0054951       | 0.0023705 | 0.0223636 | MDD           | XL_VLDL_CE    |
| Horizontal_pleiotropy | -0.0058795      | 0.002539  | 0.0225005 | MDD           | M_HDL_C       |
| Horizontal_pleiotropy | 0.0059271       | 0.002572  | 0.0231485 | MDD           | L_VLDL_L      |
| Horizontal_pleiotropy | 0.005684        | 0.0024758 | 0.023654  | MDD           | XL_VLDL_C     |
| Horizontal_pleiotropy | 0.0057246       | 0.0025329 | 0.0258577 | MDD           | L_VLDL_FC     |
| Horizontal_pleiotropy | -0.0059594      | 0.0026464 | 0.0263927 | MDD           | L_HDL_FC      |
| Horizontal_pleiotropy | -0.005751       | 0.0025549 | 0.0264506 | MDD           | HDL_L         |
| Horizontal_pleiotropy | 0.0058704       | 0.0026154 | 0.026876  | MDD           | XL_VLDL_PL    |
| Horizontal_pleiotropy | 0.005473        | 0.0024486 | 0.027502  | MDD           | L_VLDL_C      |
| Horizontal_pleiotropy | 0.005924        | 0.0026566 | 0.0278596 | MDD           | TG_by_PG      |
| Horizontal_pleiotropy | 0.0057438       | 0.0025979 | 0.0291869 | MDD           | L_VLDL_PL     |
| Horizontal_pleiotropy | -0.0055577      | 0.002527  | 0.0300256 | MDD           | HDL_PL        |
| Horizontal_pleiotropy | 0.0058443       | 0.0026661 | 0.0305611 | MDD           | XL_VLDL_L     |
| Horizontal_pleiotropy | 0.0056312       | 0.0025697 | 0.030611  | MDD           | XL_VLDL_FC    |
| Horizontal_pleiotropy | 0.0055879       | 0.0025671 | 0.0317215 | MDD           | L_VLDL_P      |
| Horizontal_pleiotropy | -0.0055088      | 0.0025575 | 0.0335107 | MDD           | M_HDL_P       |
| Horizontal_pleiotropy | 0.005101        | 0.002379  | 0.0343066 | MDD           | L_VLDL_CE     |
| Horizontal_pleiotropy | 0.0058754       | 0.0027494 | 0.0348998 | MDD           | XL_VLDL_TG    |
| Horizontal_pleiotropy | 0.0056723       | 0.0026598 | 0.0352678 | MDD           | VLDL_size     |
| Horizontal_pleiotropy | 0.005639        | 0.0026533 | 0.0358894 | MDD           | XL_VLDL_P     |
| Horizontal_pleiotropy | -0.0054222      | 0.0025612 | 0.0365914 | MDD           | M_HDL_FC      |
| Horizontal_pleiotropy | 0.004834        | 0.002331  | 0.0405188 | MDD           | M_VLDL_L      |
| Horizontal_pleiotropy | -0.0053763      | 0.0025954 | 0.0407408 | MDD           | HDL_FC        |
| Horizontal_pleiotropy | 0.0048964       | 0.002364  | 0.0407635 | MDD           | VLDL_FC       |
| Horizontal_pleiotropy | 0.0049819       | 0.0024212 | 0.0420868 | MDD           | VLDL_PL       |
| Horizontal_pleiotropy | 0.0020594       | 0.0010025 | 0.0426452 | M_VLDL_TG_pct | MDD           |
| Horizontal_pleiotropy | 0.0051527       | 0.0025174 | 0.0431442 | MDD           | VLDL_L        |
| Horizontal_pleiotropy | -0.0051996      | 0.0025681 | 0.0454161 | MDD           | ApoA1         |
| Horizontal_pleiotropy | 0.0050364       | 0.0025613 | 0.0518727 | MDD           | M_VLDL_TG     |
| Horizontal_pleiotropy | 0.0051845       | 0.0026793 | 0.055647  | MDD           | VLDL_TG       |
| Horizontal_pleiotropy | 0.0051442       | 0.0027393 | 0.063144  | MDD           | XXL_VLDL_TG   |
| Horizontal_pleiotropy | -0.0048905      | 0.0027225 | 0.0752898 | MDD           | XL_HDL_PL     |
| Horizontal_pleiotropy | 0.001889        | 0.0010497 | 0.0763554 | Unsaturation  | MDD           |
| Horizontal_pleiotropy | 0.0048259       | 0.0027158 | 0.0784382 | MDD           | L_HDL_TG_pct  |
| Horizontal_pleiotropy | -0.0049412      | 0.0027885 | 0.0792701 | MDD           | Omega_6_pct   |
| Horizontal_pleiotropy | 0.0048067       | 0.00274   | 0.0822725 | MDD           | XXL_VLDL_L    |
| Horizontal_pleiotropy | -0.0055231      | 0.0031492 | 0.0823495 | MDD           | PUFA_pct      |
| Horizontal_pleiotropy | -0.0049311      | 0.0028496 | 0.08646   | MDD           | XL_HDL_CE     |
| Horizontal_pleiotropy | 0.0040724       | 0.0023627 | 0.0876912 | MDD           | S_VLDL_P      |
| Horizontal_pleiotropy | -0.0066459      | 0.0038674 | 0.0886392 | MDD           | LA_pct        |
| Horizontal_pleiotropy | -0.0048371      | 0.0028201 | 0.0892264 | MDD           | M_HDL_C_pct   |
| Horizontal_pleiotropy | 0.0040153       | 0.0023731 | 0.0935893 | MDD           | S_VLDL_L      |
| Horizontal_pleiotropy | 0.0045311       | 0.0026901 | 0.0950512 | MDD           | Total_TG      |
| Horizontal_pleiotropy | 0.004821        | 0.0028748 | 0.0964897 | MDD           | M_HDL_PL_pct  |
| Horizontal_pleiotropy | -0.0046323      | 0.0027757 | 0.0980945 | MDD           | XL_HDL_L      |
| Horizontal_pleiotropy | 0.0044878       | 0.0027379 | 0.1041491 | MDD           | XXL_VLDL_P    |
| Horizontal_pleiotropy | -0.0044515      | 0.0027648 | 0.110364  | MDD           | M_HDL_FC_pct  |

|                       |            |           |           |                 |                 |
|-----------------------|------------|-----------|-----------|-----------------|-----------------|
| Horizontal_pleiotropy | -0.0041963 | 0.0026247 | 0.1128423 | MDD             | HDL_P           |
| Horizontal_pleiotropy | 0.0043413  | 0.0027237 | 0.1139363 | MDD             | M_HDL_TG_pct    |
| Horizontal_pleiotropy | 0.0044043  | 0.0027964 | 0.118239  | MDD             | XL_HDL_TG_pct   |
| Horizontal_pleiotropy | 0.004218   | 0.0026987 | 0.1210422 | MDD             | S_HDL_TG_pct    |
| Horizontal_pleiotropy | -0.0042954 | 0.0027565 | 0.1221516 | MDD             | M_HDL_CE_pct    |
| Horizontal_pleiotropy | -0.0044328 | 0.0028706 | 0.125522  | MDD             | XL_HDL_C        |
| Horizontal_pleiotropy | 0.0041977  | 0.0027356 | 0.1278905 | MDD             | XXL_VLDL_PL     |
| Horizontal_pleiotropy | 0.0017237  | 0.0011237 | 0.1289551 | Sphingomyelins  | MDD             |
| Horizontal_pleiotropy | -0.0044037 | 0.002889  | 0.1304113 | MDD             | L_HDL_CE_pct    |
| Horizontal_pleiotropy | 0.0034881  | 0.0023071 | 0.1335347 | MDD             | XS_VLDL_PL_pct  |
| Horizontal_pleiotropy | -0.0041002 | 0.0027595 | 0.1402823 | MDD             | XL_HDL_P        |
| Horizontal_pleiotropy | 0.00407    | 0.0027395 | 0.1403279 | MDD             | XXL_VLDL_CE     |
| Horizontal_pleiotropy | -0.0043757 | 0.0029632 | 0.1427192 | MDD             | L_HDL_C_pct     |
| Horizontal_pleiotropy | -0.0040416 | 0.0027388 | 0.1429855 | MDD             | L_VLDL_CE_pct   |
| Horizontal_pleiotropy | -0.0016755 | 0.001136  | 0.1433043 | XL_VLDL_CE_pct  | MDD             |
| Horizontal_pleiotropy | 0.0038801  | 0.0027513 | 0.161388  | MDD             | XXL_VLDL_C      |
| Horizontal_pleiotropy | -0.0015203 | 0.0010986 | 0.1697688 | L_HDL_FC_pct    | MDD             |
| Horizontal_pleiotropy | 0.0037905  | 0.0027568 | 0.1720362 | MDD             | XXL_VLDL_FC     |
| Horizontal_pleiotropy | 0.0013819  | 0.0010085 | 0.1736005 | Total_TG        | MDD             |
| Horizontal_pleiotropy | -0.0015687 | 0.0011475 | 0.1751008 | L_VLDL_CE       | MDD             |
| Horizontal_pleiotropy | -0.0015482 | 0.0011332 | 0.1752731 | L_VLDL_CE_pct   | MDD             |
| Horizontal_pleiotropy | -0.0033733 | 0.0024737 | 0.1755576 | MDD             | XXL_VLDL_PL_pct |
| Horizontal_pleiotropy | -0.0034692 | 0.0026265 | 0.1893917 | MDD             | Total_P         |
| Horizontal_pleiotropy | 0.003352   | 0.0025466 | 0.1909271 | MDD             | S_LDL_TG        |
| Horizontal_pleiotropy | 0.0016427  | 0.0012466 | 0.1916005 | Total_CE        | MDD             |
| Horizontal_pleiotropy | -0.0012682 | 0.0009674 | 0.1928323 | M_VLDL_CE_pct   | MDD             |
| Horizontal_pleiotropy | -0.0037177 | 0.0028634 | 0.1969894 | MDD             | XL_VLDL_FC_pct  |
| Horizontal_pleiotropy | 0.0034055  | 0.00265   | 0.2015654 | MDD             | L_VLDL_PL_pct   |
| Horizontal_pleiotropy | 0.001217   | 0.0009668 | 0.2104218 | HDL_CE          | MDD             |
| Horizontal_pleiotropy | -0.0043369 | 0.0034577 | 0.2125016 | MDD             | PUFA_by_MUFA    |
| Horizontal_pleiotropy | -0.0035832 | 0.0028594 | 0.2129144 | MDD             | XL_VLDL_C_pct   |
| Horizontal_pleiotropy | 0.0013492  | 0.0010782 | 0.2142583 | M_HDL_TG        | MDD             |
| Horizontal_pleiotropy | 0.0014574  | 0.0011663 | 0.2147908 | MUFA            | MDD             |
| Horizontal_pleiotropy | 0.001345   | 0.0010795 | 0.2159698 | HDL_TG          | MDD             |
| Horizontal_pleiotropy | 0.0034588  | 0.0029199 | 0.2388347 | MDD             | S_HDL_TG        |
| Horizontal_pleiotropy | -0.0033473 | 0.002827  | 0.239043  | MDD             | XL_VLDL_CE_pct  |
| Horizontal_pleiotropy | 0.0011742  | 0.0009937 | 0.2400956 | VLDL_TG         | MDD             |
| Horizontal_pleiotropy | 0.0028014  | 0.0024335 | 0.2522447 | MDD             | M_LDL_TG        |
| Horizontal_pleiotropy | 0.0030187  | 0.0026493 | 0.2570961 | MDD             | S_VLDL_TG       |
| Horizontal_pleiotropy | 0.0011006  | 0.0009686 | 0.2584874 | S_LDL_TG_pct    | MDD             |
| Horizontal_pleiotropy | 0.0014781  | 0.0013306 | 0.2695084 | HDL_PL          | MDD             |
| Horizontal_pleiotropy | 0.0010969  | 0.0009907 | 0.2704057 | HDL_C           | MDD             |
| Horizontal_pleiotropy | 0.0014136  | 0.001279  | 0.2718666 | M_HDL_P         | MDD             |
| Horizontal_pleiotropy | -0.0010794 | 0.0010092 | 0.2869516 | XL_HDL_FC_pct   | MDD             |
| Horizontal_pleiotropy | -0.0011928 | 0.0011223 | 0.2907964 | M_VLDL_FC_pct   | MDD             |
| Horizontal_pleiotropy | 0.0013359  | 0.0012699 | 0.2951026 | M_HDL_CE        | MDD             |
| Horizontal_pleiotropy | -0.0012764 | 0.001221  | 0.2987232 | L_VLDL_C        | MDD             |
| Horizontal_pleiotropy | 0.0029887  | 0.0028963 | 0.3044774 | MDD             | XS_VLDL_FC_pct  |
| Horizontal_pleiotropy | -0.0010121 | 0.0009827 | 0.3055334 | M_VLDL_C_pct    | MDD             |
| Horizontal_pleiotropy | 0.0029915  | 0.0029366 | 0.3106662 | MDD             | L_HDL_PL_pct    |
| Horizontal_pleiotropy | 0.0012438  | 0.0012334 | 0.315626  | M_HDL_C         | MDD             |
| Horizontal_pleiotropy | 0.0011227  | 0.0011255 | 0.3207864 | IDL_TG_pct      | MDD             |
| Horizontal_pleiotropy | 0.0009414  | 0.0009484 | 0.3237505 | M_LDL_TG_pct    | MDD             |
| Horizontal_pleiotropy | 0.0027317  | 0.0027868 | 0.3292103 | MDD             | XL_VLDL_TG_pct  |
| Horizontal_pleiotropy | 0.0015767  | 0.0016053 | 0.3311415 | Citrate         | MDD             |
| Horizontal_pleiotropy | -0.0012722 | 0.0013418 | 0.3458028 | VLDL_FC         | MDD             |
| Horizontal_pleiotropy | -0.0027509 | 0.0029194 | 0.3481894 | MDD             | M_VLDL_CE_pct   |
| Horizontal_pleiotropy | -0.0022397 | 0.0023743 | 0.349651  | Ala             | MDD             |
| Horizontal_pleiotropy | 0.0008784  | 0.0009558 | 0.3600769 | XL_HDL_L        | MDD             |
| Horizontal_pleiotropy | 0.0011068  | 0.0012004 | 0.3606209 | XXL_VLDL_PL_pct | MDD             |
| Horizontal_pleiotropy | 0.0025524  | 0.0028004 | 0.3641339 | MDD             | MUFA            |
| Horizontal_pleiotropy | -0.0044933 | 0.004931  | 0.3642372 | MDD             | Unsaturation    |

|                       |            |           |           |                |               |
|-----------------------|------------|-----------|-----------|----------------|---------------|
| Horizontal_pleiotropy | -0.0010164 | 0.0011241 | 0.3680372 | XL_VLDL_C_pct  | MDD           |
| Horizontal_pleiotropy | 0.0032802  | 0.0036296 | 0.3681908 | MDD            | MUFA_pct      |
| Horizontal_pleiotropy | 0.0009043  | 0.0010009 | 0.3683777 | XL_HDL_P       | MDD           |
| Horizontal_pleiotropy | 0.0010562  | 0.0011961 | 0.3797062 | XL_VLDL_TG_pct | MDD           |
| Horizontal_pleiotropy | -0.000917  | 0.0010518 | 0.3854932 | XL_VLDL_PL     | MDD           |
| Horizontal_pleiotropy | 0.0008227  | 0.0009542 | 0.3905719 | S_VLDL_TG      | MDD           |
| Horizontal_pleiotropy | 0.0008771  | 0.0010556 | 0.4080093 | XXL_VLDL_PL    | MDD           |
| Horizontal_pleiotropy | -0.002425  | 0.0029308 | 0.4098569 | MDD            | M_VLDL_C_pct  |
| Horizontal_pleiotropy | -0.0024059 | 0.0029143 | 0.4109144 | MDD            | XL_HDL_FC     |
| Horizontal_pleiotropy | -0.0009995 | 0.0012218 | 0.415586  | VLDL_PL        | MDD           |
| Horizontal_pleiotropy | -0.0010162 | 0.0012818 | 0.4300297 | XL_VLDL_CE     | MDD           |
| Horizontal_pleiotropy | 0.0007269  | 0.0009298 | 0.4360826 | XL_HDL_FC      | MDD           |
| Horizontal_pleiotropy | -0.0020568 | 0.0027045 | 0.4486449 | MDD            | S_HDL_FC_pct  |
| Horizontal_pleiotropy | 0.0019139  | 0.0025475 | 0.4541411 | MDD            | XS_VLDL_TG    |
| Horizontal_pleiotropy | 0.0007235  | 0.0009632 | 0.4541608 | XL_HDL_PL      | MDD           |
| Horizontal_pleiotropy | -0.0009403 | 0.0012496 | 0.4544126 | IDL_FC_pct     | MDD           |
| Horizontal_pleiotropy | -0.0008208 | 0.001134  | 0.4710113 | L_VLDL_FC      | MDD           |
| Horizontal_pleiotropy | -0.0007668 | 0.0010784 | 0.4789755 | VLDL_L         | MDD           |
| Horizontal_pleiotropy | 0.0020492  | 0.0028985 | 0.4811238 | MDD            | M_VLDL_TG_pct |
| Horizontal_pleiotropy | 0.0006611  | 0.0009439 | 0.4848866 | L_HDL_FC       | MDD           |
| Horizontal_pleiotropy | 0.0016687  | 0.002393  | 0.4871249 | MDD            | IDL_TG        |
| Horizontal_pleiotropy | 0.0006458  | 0.0009459 | 0.496374  | XS_VLDL_TG_pct | MDD           |
| Horizontal_pleiotropy | -0.000645  | 0.0009474 | 0.4979237 | S_HDL_C_pct    | MDD           |
| Horizontal_pleiotropy | 0.0006507  | 0.0009784 | 0.5076204 | L_LDL_TG_pct   | MDD           |
| Horizontal_pleiotropy | -0.0007124 | 0.0010928 | 0.5161681 | L_VLDL_L       | MDD           |
| Horizontal_pleiotropy | -0.0007265 | 0.0011155 | 0.516385  | S_VLDL_P       | MDD           |
| Horizontal_pleiotropy | -0.00168   | 0.0026101 | 0.5211959 | MDD            | M_LDL_TG_pct  |
| Horizontal_pleiotropy | 0.0008463  | 0.0013204 | 0.5231844 | ApoA1          | MDD           |
| Horizontal_pleiotropy | -0.0006471 | 0.0010233 | 0.5287615 | S_VLDL_FC_pct  | MDD           |
| Horizontal_pleiotropy | -0.0007348 | 0.0011734 | 0.5328487 | XL_VLDL_C      | MDD           |
| Horizontal_pleiotropy | 0.0005788  | 0.000936  | 0.5373154 | L_HDL_P        | MDD           |
| Horizontal_pleiotropy | -0.0007568 | 0.0012308 | 0.5403497 | XL_VLDL_FC_pct | MDD           |
| Horizontal_pleiotropy | 0.0006038  | 0.0010001 | 0.5474138 | XXL_VLDL_FC    | MDD           |
| Horizontal_pleiotropy | -0.0013485 | 0.0022538 | 0.5508945 | MDD            | Citrate       |
| Horizontal_pleiotropy | -0.0006004 | 0.0010088 | 0.5533391 | S_HDL_FC_pct   | MDD           |
| Horizontal_pleiotropy | -0.0005875 | 0.0009955 | 0.5562346 | S_HDL_TG       | MDD           |
| Horizontal_pleiotropy | -0.0006171 | 0.0010702 | 0.565616  | XL_VLDL_FC     | MDD           |
| Horizontal_pleiotropy | 0.0006114  | 0.001072  | 0.5697697 | IDL_TG         | MDD           |
| Horizontal_pleiotropy | -0.0006166 | 0.0011415 | 0.5905705 | M_VLDL_L       | MDD           |
| Horizontal_pleiotropy | 0.0006111  | 0.001133  | 0.591322  | IDL_FC         | MDD           |
| Horizontal_pleiotropy | 0.0005197  | 0.0009965 | 0.6030436 | XL_VLDL_TG     | MDD           |
| Horizontal_pleiotropy | -0.0005423 | 0.0010447 | 0.6048993 | XXL_VLDL_L     | MDD           |
| Horizontal_pleiotropy | -0.001229  | 0.0023764 | 0.6061037 | MDD            | Ala           |
| Horizontal_pleiotropy | -0.0006188 | 0.0012048 | 0.6088339 | PUFA_by_MUFA   | MDD           |
| Horizontal_pleiotropy | -0.000535  | 0.0010531 | 0.6123612 | M_HDL_TG_pct   | MDD           |
| Horizontal_pleiotropy | -0.0014771 | 0.002936  | 0.6159365 | MDD            | M_VLDL_FC_pct |
| Horizontal_pleiotropy | 0.0009179  | 0.0018385 | 0.6210045 | Pyruvate       | MDD           |
| Horizontal_pleiotropy | -0.0014977 | 0.0030737 | 0.6270893 | MDD            | IDL_FC_pct    |
| Horizontal_pleiotropy | -0.0013567 | 0.0028347 | 0.6332035 | MDD            | L_HDL_FC_pct  |
| Horizontal_pleiotropy | 0.0004795  | 0.0010119 | 0.6364233 | TG_by_PG       | MDD           |
| Horizontal_pleiotropy | -0.0005758 | 0.0012374 | 0.6427774 | S_VLDL_L       | MDD           |
| Horizontal_pleiotropy | -0.000415  | 0.000906  | 0.6477171 | L_HDL_C_pct    | MDD           |
| Horizontal_pleiotropy | 0.0011324  | 0.0024755 | 0.6482856 | MDD            | IDL_L         |
| Horizontal_pleiotropy | -0.0004898 | 0.0010785 | 0.6506293 | L_HDL_CE_pct   | MDD           |
| Horizontal_pleiotropy | -0.0004439 | 0.0009825 | 0.6522729 | S_HDL_TG_pct   | MDD           |
| Horizontal_pleiotropy | 0.0010956  | 0.0024967 | 0.6617018 | MDD            | IDL_CE        |
| Horizontal_pleiotropy | -0.000572  | 0.0013966 | 0.683129  | HDL_P          | MDD           |
| Horizontal_pleiotropy | 0.0010296  | 0.0025322 | 0.6851058 | MDD            | IDL_C         |
| Horizontal_pleiotropy | 0.0003752  | 0.0009496 | 0.6933002 | L_HDL_C        | MDD           |
| Horizontal_pleiotropy | 0.0010403  | 0.0027466 | 0.7056161 | MDD            | S_VLDL_C_pct  |
| Horizontal_pleiotropy | 0.0004121  | 0.0011002 | 0.7089826 | Omega_6_pct    | MDD           |
| Horizontal_pleiotropy | -0.0003973 | 0.0010641 | 0.7096158 | L_VLDL_PL_pct  | MDD           |



|                       |            |           |           |                |                |
|-----------------------|------------|-----------|-----------|----------------|----------------|
| Horizontal_pleiotropy | -0.0003498 | 0.0009856 | 0.7233241 | XL_VLDL_L      | MDD            |
| Horizontal_pleiotropy | 0.000469   | 0.0013243 | 0.7239987 | M_HDL_FC       | MDD            |
| Horizontal_pleiotropy | 0.0003794  | 0.0010773 | 0.7254876 | MUFA_pct       | MDD            |
| Horizontal_pleiotropy | 0.0009737  | 0.0027671 | 0.7256321 | MDD            | HDL_TG         |
| Horizontal_pleiotropy | 0.0003534  | 0.001042  | 0.7351079 | VLDL_size      | MDD            |
| Horizontal_pleiotropy | 0.0002935  | 0.0008884 | 0.7417109 | XL_HDL_CE      | MDD            |
| Horizontal_pleiotropy | -0.0003296 | 0.0010086 | 0.7444832 | L_VLDL_TG      | MDD            |
| Horizontal_pleiotropy | -0.0009128 | 0.0028341 | 0.7480361 | MDD            | XS_VLDL_CE_pct |
| Horizontal_pleiotropy | 0.0003455  | 0.0010827 | 0.7502466 | M_HDL_FC_pct   | MDD            |
| Horizontal_pleiotropy | 0.0008374  | 0.0026384 | 0.7515783 | MDD            | IDL_FC         |
| Horizontal_pleiotropy | 0.000375   | 0.0012161 | 0.7584327 | HDL_L          | MDD            |
| Horizontal_pleiotropy | 0.0003684  | 0.0011972 | 0.7588732 | L_HDL_PL_pct   | MDD            |
| Horizontal_pleiotropy | 0.0004043  | 0.0013402 | 0.7638551 | S_IDL_PL_pct   | MDD            |
| Horizontal_pleiotropy | -0.000343  | 0.001141  | 0.7643883 | L_VLDL_PL      | MDD            |
| Horizontal_pleiotropy | 0.0002811  | 0.0009364 | 0.7644586 | L_HDL_L        | MDD            |
| Horizontal_pleiotropy | 0.0003043  | 0.0010239 | 0.7669171 | S_IDL_TG       | MDD            |
| Horizontal_pleiotropy | -0.0006661 | 0.0022416 | 0.766943  | MDD            | Pyruvate       |
| Horizontal_pleiotropy | 0.0002647  | 0.0008913 | 0.7671616 | S_VLDL_TG_pct  | MDD            |
| Horizontal_pleiotropy | 0.000828   | 0.0028944 | 0.7753929 | MDD            | M_HDL_TG       |
| Horizontal_pleiotropy | -0.0002958 | 0.0010369 | 0.776061  | IDL_CE_pct     | MDD            |
| Horizontal_pleiotropy | -0.000398  | 0.0014105 | 0.7786256 | PUFA_pct       | MDD            |
| Horizontal_pleiotropy | -0.0002804 | 0.001044  | 0.788802  | XS_VLDL_C_pct  | MDD            |
| Horizontal_pleiotropy | 0.0002771  | 0.0010341 | 0.7893431 | XXL_VLDL_P     | MDD            |
| Horizontal_pleiotropy | -0.0002327 | 0.0009361 | 0.8041136 | XL_HDL_C       | MDD            |
| Horizontal_pleiotropy | -0.0002379 | 0.0009685 | 0.8065383 | S_VLDL_PL_pct  | MDD            |
| Horizontal_pleiotropy | -0.0002759 | 0.00114   | 0.8094601 | IDL_L          | MDD            |
| Horizontal_pleiotropy | -0.0006714 | 0.0027948 | 0.8106243 | MDD            | S_VLDL_TG_pct  |
| Horizontal_pleiotropy | -0.0006094 | 0.0027192 | 0.8231028 | MDD            | S_HDL_C_pct    |
| Horizontal_pleiotropy | 0.000209   | 0.0010622 | 0.8444077 | M_IDL_TG       | MDD            |
| Horizontal_pleiotropy | 0.0001843  | 0.0009539 | 0.8470625 | L_HDL_PL       | MDD            |
| Horizontal_pleiotropy | 0.0001786  | 0.0009731 | 0.85477   | XXL_VLDL_TG    | MDD            |
| Horizontal_pleiotropy | -0.0002093 | 0.0011411 | 0.8550011 | XS_VLDL_FC_pct | MDD            |
| Horizontal_pleiotropy | -0.0001988 | 0.001131  | 0.8608733 | L_VLDL_P       | MDD            |
| Horizontal_pleiotropy | 0.0001907  | 0.0010911 | 0.8616189 | M_VLDL_TG      | MDD            |
| Horizontal_pleiotropy | 0.0001829  | 0.0010899 | 0.8670396 | M_HDL_PL_pct   | MDD            |
| Horizontal_pleiotropy | -0.0001685 | 0.0010317 | 0.870589  | IDL_C_pct      | MDD            |
| Horizontal_pleiotropy | -0.0001788 | 0.0011548 | 0.8773357 | XS_VLDL_PL_pct | MDD            |
| Horizontal_pleiotropy | 0.0001484  | 0.0009902 | 0.8810911 | XL_HDL_TG_pct  | MDD            |
| Horizontal_pleiotropy | -0.0003778 | 0.0026393 | 0.8864468 | MDD            | L_IDL_TG_pct   |
| Horizontal_pleiotropy | -0.0001516 | 0.0010895 | 0.8895901 | HDL_FC         | MDD            |
| Horizontal_pleiotropy | -0.000379  | 0.0028884 | 0.8958429 | MDD            | XS_VLDL_C_pct  |
| Horizontal_pleiotropy | 0.0001332  | 0.0010898 | 0.9029647 | M_HDL_CE_pct   | MDD            |
| Horizontal_pleiotropy | 0.0003008  | 0.002492  | 0.9041412 | MDD            | IDL_CE_pct     |
| Horizontal_pleiotropy | -0.0003276 | 0.0027762 | 0.9062976 | MDD            | S_IDL_PL_pct   |
| Horizontal_pleiotropy | -0.0001066 | 0.0009161 | 0.90759   | XS_VLDL_TG     | MDD            |
| Horizontal_pleiotropy | 0.0001052  | 0.0009998 | 0.9163882 | XXL_VLDL_C     | MDD            |
| Horizontal_pleiotropy | -0.0002585 | 0.0027195 | 0.924442  | MDD            | Sphingomyelins |
| Horizontal_pleiotropy | 0.0000985  | 0.0010792 | 0.9274978 | IDL_CE         | MDD            |
| Horizontal_pleiotropy | -0.0001258 | 0.0014095 | 0.929112  | Total_P        | MDD            |
| Horizontal_pleiotropy | 0.0002199  | 0.0027195 | 0.9357026 | MDD            | IDL_C_pct      |
| Horizontal_pleiotropy | -0.0002361 | 0.0029416 | 0.9361674 | MDD            | XS_VLDL_TG_pct |
| Horizontal_pleiotropy | -0.0002211 | 0.0029172 | 0.9397223 | MDD            | S_VLDL_FC_pct  |
| Horizontal_pleiotropy | -0.000083  | 0.0011101 | 0.9405533 | XXL_VLDL_CE    | MDD            |
| Horizontal_pleiotropy | 0.000071   | 0.0009815 | 0.9424923 | S_VLDL_C_pct   | MDD            |
| Horizontal_pleiotropy | 0.0000706  | 0.0010377 | 0.9458793 | XS_VLDL_CE_pct | MDD            |
| Horizontal_pleiotropy | -0.0001953 | 0.0028791 | 0.9460461 | MDD            | S_VLDL_PL_pct  |
| Horizontal_pleiotropy | 0.0000699  | 0.0010394 | 0.9464983 | M_HDL_C_pct    | MDD            |
| Horizontal_pleiotropy | 0.000061   | 0.0009592 | 0.9493856 | L_HDL_CE       | MDD            |
| Horizontal_pleiotropy | -0.0000634 | 0.0010134 | 0.9502024 | HDL_size       | MDD            |
| Horizontal_pleiotropy | -0.0001212 | 0.0028082 | 0.9656536 | MDD            | IDL_TG_pct     |
| Horizontal_pleiotropy | 0.0000399  | 0.0010236 | 0.9689447 | XL_VLDL_P      | MDD            |
| Horizontal_pleiotropy | -0.0000379 | 0.0010765 | 0.9720063 | IDL_C          | MDD            |

|                       |            |           |           |              |              |
|-----------------------|------------|-----------|-----------|--------------|--------------|
| Horizontal_pleiotropy | -0.0000613 | 0.0024997 | 0.9804774 | MDD          | Total_CE     |
| Horizontal_pleiotropy | -0.0000165 | 0.0009904 | 0.9867707 | L_HDL_TG_pct | MDD          |
| Horizontal_pleiotropy | -0.0000294 | 0.0028805 | 0.9918812 | MDD          | S_LDL_TG_pct |
| Horizontal_pleiotropy | 0.0000096  | 0.0014141 | 0.9945819 | LA_pct       | MDD          |

**eTable 8. Results of Heterogeneity test in Mendelian Randomization**

| method                    | Q        | Q_df | Q_pval | analysis            | exposure   | outcome       |
|---------------------------|----------|------|--------|---------------------|------------|---------------|
| MR Egger                  | 201.2925 | 102  | 0      | Heterogeneity_tests | HDL_L      | MDD           |
| Inverse variance weighted | 201.4802 | 103  | 0      | Heterogeneity_tests | HDL_L      | MDD           |
| MR Egger                  | 199.042  | 93   | 0      | Heterogeneity_tests | HDL_PL     | MDD           |
| Inverse variance weighted | 201.6829 | 94   | 0      | Heterogeneity_tests | HDL_PL     | MDD           |
| MR Egger                  | 214.9488 | 106  | 0      | Heterogeneity_tests | IDL_TG_pct | MDD           |
| Inverse variance weighted | 216.9665 | 107  | 0      | Heterogeneity_tests | IDL_TG_pct | MDD           |
| MR Egger                  | 262.3141 | 145  | 0      | Heterogeneity_tests | L_HDL_CE   | MDD           |
| Inverse variance weighted | 262.3214 | 146  | 0      | Heterogeneity_tests | L_HDL_CE   | MDD           |
| MR Egger                  | 210.1844 | 106  | 0      | Heterogeneity_tests | MDD        | HDL_C         |
| Inverse variance weighted | 221.1552 | 107  | 0      | Heterogeneity_tests | MDD        | HDL_C         |
| MR Egger                  | 207.2396 | 106  | 0      | Heterogeneity_tests | MDD        | HDL_CE        |
| Inverse variance weighted | 218.7706 | 107  | 0      | Heterogeneity_tests | MDD        | HDL_CE        |
| MR Egger                  | 210.7846 | 106  | 0      | Heterogeneity_tests | MDD        | HDL_FC        |
| Inverse variance weighted | 219.3175 | 107  | 0      | Heterogeneity_tests | MDD        | HDL_FC        |
| Inverse variance weighted | 208.3633 | 107  | 0      | Heterogeneity_tests | MDD        | HDL_L         |
| MR Egger                  | 218.6184 | 106  | 0      | Heterogeneity_tests | MDD        | HDL_size      |
| Inverse variance weighted | 230.4838 | 107  | 0      | Heterogeneity_tests | MDD        | HDL_size      |
| MR Egger                  | 235.7415 | 106  | 0      | Heterogeneity_tests | MDD        | IDL_FC_pct    |
| Inverse variance weighted | 236.2695 | 107  | 0      | Heterogeneity_tests | MDD        | IDL_FC_pct    |
| MR Egger                  | 207.5323 | 106  | 0      | Heterogeneity_tests | MDD        | IDL_TG_pct    |
| Inverse variance weighted | 207.5359 | 107  | 0      | Heterogeneity_tests | MDD        | IDL_TG_pct    |
| MR Egger                  | 384.1792 | 106  | 0      | Heterogeneity_tests | MDD        | LA_pct        |
| Inverse variance weighted | 394.8818 | 107  | 0      | Heterogeneity_tests | MDD        | LA_pct        |
| MR Egger                  | 230.4705 | 106  | 0      | Heterogeneity_tests | MDD        | L_HDL_C       |
| Inverse variance weighted | 243.1716 | 107  | 0      | Heterogeneity_tests | MDD        | L_HDL_C       |
| MR Egger                  | 231.2864 | 106  | 0      | Heterogeneity_tests | MDD        | L_HDL_CE      |
| Inverse variance weighted | 244.4723 | 107  | 0      | Heterogeneity_tests | MDD        | L_HDL_CE      |
| MR Egger                  | 223.9831 | 106  | 0      | Heterogeneity_tests | MDD        | L_HDL_CE_pct  |
| Inverse variance weighted | 228.8927 | 107  | 0      | Heterogeneity_tests | MDD        | L_HDL_CE_pct  |
| MR Egger                  | 242.7513 | 106  | 0      | Heterogeneity_tests | MDD        | L_HDL_C_pct   |
| Inverse variance weighted | 247.7452 | 107  | 0      | Heterogeneity_tests | MDD        | L_HDL_C_pct   |
| MR Egger                  | 223.9349 | 106  | 0      | Heterogeneity_tests | MDD        | L_HDL_FC      |
| Inverse variance weighted | 234.6476 | 107  | 0      | Heterogeneity_tests | MDD        | L_HDL_FC      |
| MR Egger                  | 228.5701 | 106  | 0      | Heterogeneity_tests | MDD        | L_HDL_FC_pct  |
| Inverse variance weighted | 229.064  | 107  | 0      | Heterogeneity_tests | MDD        | L_HDL_FC_pct  |
| MR Egger                  | 219.1895 | 106  | 0      | Heterogeneity_tests | MDD        | L_HDL_L       |
| Inverse variance weighted | 231.9907 | 107  | 0      | Heterogeneity_tests | MDD        | L_HDL_L       |
| MR Egger                  | 228.5429 | 106  | 0      | Heterogeneity_tests | MDD        | L_HDL_P       |
| Inverse variance weighted | 240.7348 | 107  | 0      | Heterogeneity_tests | MDD        | L_HDL_P       |
| MR Egger                  | 208.0086 | 106  | 0      | Heterogeneity_tests | MDD        | L_HDL_PL      |
| Inverse variance weighted | 220.6451 | 107  | 0      | Heterogeneity_tests | MDD        | L_HDL_PL      |
| MR Egger                  | 226.2845 | 106  | 0      | Heterogeneity_tests | MDD        | L_HDL_PL_pct  |
| Inverse variance weighted | 228.4998 | 107  | 0      | Heterogeneity_tests | MDD        | L_HDL_PL_pct  |
| MR Egger                  | 203.2759 | 106  | 0      | Heterogeneity_tests | MDD        | L_HDL_TG_pct  |
| Inverse variance weighted | 209.3314 | 107  | 0      | Heterogeneity_tests | MDD        | L_HDL_TG_pct  |
| Inverse variance weighted | 205.6039 | 107  | 0      | Heterogeneity_tests | MDD        | L_VLDL_CE_pct |
| MR Egger                  | 215.5218 | 106  | 0      | Heterogeneity_tests | MDD        | M_HDL_C_pct   |
| Inverse variance weighted | 221.5035 | 107  | 0      | Heterogeneity_tests | MDD        | M_HDL_C_pct   |
| MR Egger                  | 238.9084 | 106  | 0      | Heterogeneity_tests | MDD        | M_HDL_FC_pct  |
| Inverse variance weighted | 244.7509 | 107  | 0      | Heterogeneity_tests | MDD        | M_HDL_FC_pct  |
| MR Egger                  | 225.6651 | 106  | 0      | Heterogeneity_tests | MDD        | M_HDL_PL_pct  |
| Inverse variance weighted | 231.6522 | 107  | 0      | Heterogeneity_tests | MDD        | M_HDL_PL_pct  |
| MR Egger                  | 210.9956 | 106  | 0      | Heterogeneity_tests | MDD        | M_HDL_TG      |
| Inverse variance weighted | 211.1585 | 107  | 0      | Heterogeneity_tests | MDD        | M_HDL_TG      |
| MR Egger                  | 352.3428 | 106  | 0      | Heterogeneity_tests | MDD        | MUFA_pct      |
| Inverse variance weighted | 355.0576 | 107  | 0      | Heterogeneity_tests | MDD        | MUFA_pct      |
| MR Egger                  | 237.5876 | 106  | 0      | Heterogeneity_tests | MDD        | M_VLDL_CE_pct |
| Inverse variance weighted | 239.5778 | 107  | 0      | Heterogeneity_tests | MDD        | M_VLDL_CE_pct |

|                           |          |     |   |                     |     |                |
|---------------------------|----------|-----|---|---------------------|-----|----------------|
| MR Egger                  | 238.1782 | 106 | 0 | Heterogeneity_tests | MDD | M_VLDL_C_pct   |
| Inverse variance weighted | 239.7165 | 107 | 0 | Heterogeneity_tests | MDD | M_VLDL_C_pct   |
| MR Egger                  | 234.2096 | 106 | 0 | Heterogeneity_tests | MDD | M_VLDL_FC_pct  |
| Inverse variance weighted | 234.7689 | 107 | 0 | Heterogeneity_tests | MDD | M_VLDL_FC_pct  |
| MR Egger                  | 231.4116 | 106 | 0 | Heterogeneity_tests | MDD | M_VLDL_TG_pct  |
| Inverse variance weighted | 232.5028 | 107 | 0 | Heterogeneity_tests | MDD | M_VLDL_TG_pct  |
| Inverse variance weighted | 207.8016 | 107 | 0 | Heterogeneity_tests | MDD | Omega_6_pct    |
| MR Egger                  | 319.5948 | 106 | 0 | Heterogeneity_tests | MDD | PUFA_by_MUFA   |
| Inverse variance weighted | 324.3381 | 107 | 0 | Heterogeneity_tests | MDD | PUFA_by_MUFA   |
| MR Egger                  | 263.2593 | 106 | 0 | Heterogeneity_tests | MDD | PUFA_pct       |
| Inverse variance weighted | 270.8986 | 107 | 0 | Heterogeneity_tests | MDD | PUFA_pct       |
| MR Egger                  | 222.7096 | 106 | 0 | Heterogeneity_tests | MDD | S_HDL_TG       |
| Inverse variance weighted | 225.6578 | 107 | 0 | Heterogeneity_tests | MDD | S_HDL_TG       |
| MR Egger                  | 217.1116 | 106 | 0 | Heterogeneity_tests | MDD | S_LDL_TG_pct   |
| Inverse variance weighted | 217.1118 | 107 | 0 | Heterogeneity_tests | MDD | S_LDL_TG_pct   |
| MR Egger                  | 229.2401 | 106 | 0 | Heterogeneity_tests | MDD | S_VLDL_FC_pct  |
| Inverse variance weighted | 229.2525 | 107 | 0 | Heterogeneity_tests | MDD | S_VLDL_FC_pct  |
| MR Egger                  | 222.3953 | 106 | 0 | Heterogeneity_tests | MDD | S_VLDL_PL_pct  |
| Inverse variance weighted | 222.405  | 107 | 0 | Heterogeneity_tests | MDD | S_VLDL_PL_pct  |
| MR Egger                  | 205.0128 | 106 | 0 | Heterogeneity_tests | MDD | S_VLDL_TG_pct  |
| Inverse variance weighted | 205.1244 | 107 | 0 | Heterogeneity_tests | MDD | S_VLDL_TG_pct  |
| MR Egger                  | 207.9514 | 106 | 0 | Heterogeneity_tests | MDD | Sphingomyelins |
| Inverse variance weighted | 207.9691 | 107 | 0 | Heterogeneity_tests | MDD | Sphingomyelins |
| Inverse variance weighted | 210.8003 | 107 | 0 | Heterogeneity_tests | MDD | TG_by_PG       |
| MR Egger                  | 660.2308 | 106 | 0 | Heterogeneity_tests | MDD | Unsaturation   |
| Inverse variance weighted | 665.4027 | 107 | 0 | Heterogeneity_tests | MDD | Unsaturation   |
| Inverse variance weighted | 208.7638 | 107 | 0 | Heterogeneity_tests | MDD | VLDL_size      |
| MR Egger                  | 248.8841 | 106 | 0 | Heterogeneity_tests | MDD | XL_HDL_C       |
| Inverse variance weighted | 254.4829 | 107 | 0 | Heterogeneity_tests | MDD | XL_HDL_C       |
| MR Egger                  | 248.6384 | 106 | 0 | Heterogeneity_tests | MDD | XL_HDL_CE      |
| Inverse variance weighted | 255.6624 | 107 | 0 | Heterogeneity_tests | MDD | XL_HDL_CE      |
| MR Egger                  | 240.3393 | 106 | 0 | Heterogeneity_tests | MDD | XL_HDL_FC      |
| Inverse variance weighted | 241.8846 | 107 | 0 | Heterogeneity_tests | MDD | XL_HDL_FC      |
| Inverse variance weighted | 211.0606 | 107 | 0 | Heterogeneity_tests | MDD | XL_HDL_FC_pct  |
| MR Egger                  | 234.3353 | 106 | 0 | Heterogeneity_tests | MDD | XL_HDL_L       |
| Inverse variance weighted | 240.4924 | 107 | 0 | Heterogeneity_tests | MDD | XL_HDL_L       |
| MR Egger                  | 230.9444 | 106 | 0 | Heterogeneity_tests | MDD | XL_HDL_P       |
| Inverse variance weighted | 235.7546 | 107 | 0 | Heterogeneity_tests | MDD | XL_HDL_P       |
| MR Egger                  | 225.3077 | 106 | 0 | Heterogeneity_tests | MDD | XL_HDL_PL      |
| Inverse variance weighted | 232.1664 | 107 | 0 | Heterogeneity_tests | MDD | XL_HDL_PL      |
| MR Egger                  | 216.3487 | 106 | 0 | Heterogeneity_tests | MDD | XL_HDL_TG_pct  |
| Inverse variance weighted | 221.4117 | 107 | 0 | Heterogeneity_tests | MDD | XL_HDL_TG_pct  |
| MR Egger                  | 213.6515 | 106 | 0 | Heterogeneity_tests | MDD | XL_VLDL_CE_pct |
| Inverse variance weighted | 216.4773 | 107 | 0 | Heterogeneity_tests | MDD | XL_VLDL_CE_pct |
| MR Egger                  | 218.7833 | 106 | 0 | Heterogeneity_tests | MDD | XL_VLDL_C_pct  |
| Inverse variance weighted | 222.0245 | 107 | 0 | Heterogeneity_tests | MDD | XL_VLDL_C_pct  |
| MR Egger                  | 214.4759 | 106 | 0 | Heterogeneity_tests | MDD | XL_VLDL_FC_pct |
| Inverse variance weighted | 217.8866 | 107 | 0 | Heterogeneity_tests | MDD | XL_VLDL_FC_pct |
| MR Egger                  | 203.1492 | 106 | 0 | Heterogeneity_tests | MDD | XL_VLDL_TG     |
| Inverse variance weighted | 211.9012 | 107 | 0 | Heterogeneity_tests | MDD | XL_VLDL_TG     |
| MR Egger                  | 203.2787 | 106 | 0 | Heterogeneity_tests | MDD | XL_VLDL_TG_pct |
| Inverse variance weighted | 205.1213 | 107 | 0 | Heterogeneity_tests | MDD | XL_VLDL_TG_pct |
| MR Egger                  | 221.998  | 106 | 0 | Heterogeneity_tests | MDD | XS_VLDL_CE_pct |
| Inverse variance weighted | 222.2152 | 107 | 0 | Heterogeneity_tests | MDD | XS_VLDL_CE_pct |
| MR Egger                  | 228.1816 | 106 | 0 | Heterogeneity_tests | MDD | XS_VLDL_C_pct  |
| Inverse variance weighted | 228.2187 | 107 | 0 | Heterogeneity_tests | MDD | XS_VLDL_C_pct  |
| MR Egger                  | 209.1171 | 106 | 0 | Heterogeneity_tests | MDD | XS_VLDL_FC_pct |
| Inverse variance weighted | 211.2177 | 107 | 0 | Heterogeneity_tests | MDD | XS_VLDL_FC_pct |
| MR Egger                  | 235.5313 | 106 | 0 | Heterogeneity_tests | MDD | XS_VLDL_TG_pct |
| Inverse variance weighted | 235.5456 | 107 | 0 | Heterogeneity_tests | MDD | XS_VLDL_TG_pct |
| Inverse variance weighted | 204.1011 | 107 | 0 | Heterogeneity_tests | MDD | XXL_VLDL_C     |
| Inverse variance weighted | 204.8994 | 107 | 0 | Heterogeneity_tests | MDD | XXL_VLDL_FC    |

|                           |          |     |       |                     |                |               |
|---------------------------|----------|-----|-------|---------------------|----------------|---------------|
| Inverse variance weighted | 204.7859 | 107 | 0     | Heterogeneity_tests | MDD            | XXL_VLDL_L    |
| Inverse variance weighted | 204.2841 | 107 | 0     | Heterogeneity_tests | MDD            | XXL_VLDL_P    |
| Inverse variance weighted | 204.1907 | 107 | 0     | Heterogeneity_tests | MDD            | XXL_VLDL_PL   |
| Inverse variance weighted | 204.8323 | 107 | 0     | Heterogeneity_tests | MDD            | XXL_VLDL_TG   |
| MR Egger                  | 226.5198 | 110 | 0     | Heterogeneity_tests | M_HDL_CE       | MDD           |
| Inverse variance weighted | 228.7988 | 111 | 0     | Heterogeneity_tests | M_HDL_CE       | MDD           |
| MR Egger                  | 189.9735 | 95  | 0     | Heterogeneity_tests | M_HDL_FC       | MDD           |
| Inverse variance weighted | 190.2243 | 96  | 0     | Heterogeneity_tests | M_HDL_FC       | MDD           |
| MR Egger                  | 188.5988 | 95  | 0     | Heterogeneity_tests | M_HDL_P        | MDD           |
| Inverse variance weighted | 191.0237 | 96  | 0     | Heterogeneity_tests | M_HDL_P        | MDD           |
| MR Egger                  | 179.2346 | 90  | 1E-07 | Heterogeneity_tests | ApoA1          | MDD           |
| Inverse variance weighted | 180.0527 | 91  | 1E-07 | Heterogeneity_tests | ApoA1          | MDD           |
| MR Egger                  | 224.254  | 125 | 1E-07 | Heterogeneity_tests | HDL_size       | MDD           |
| MR Egger                  | 252.9037 | 145 | 1E-07 | Heterogeneity_tests | L_HDL_C        | MDD           |
| Inverse variance weighted | 253.176  | 146 | 1E-07 | Heterogeneity_tests | L_HDL_C        | MDD           |
| MR Egger                  | 248.2768 | 141 | 1E-07 | Heterogeneity_tests | L_HDL_L        | MDD           |
| Inverse variance weighted | 248.4355 | 142 | 1E-07 | Heterogeneity_tests | L_HDL_L        | MDD           |
| MR Egger                  | 205.8582 | 111 | 1E-07 | Heterogeneity_tests | L_HDL_PL_pct   | MDD           |
| Inverse variance weighted | 200.9537 | 107 | 1E-07 | Heterogeneity_tests | MDD            | ApoA1         |
| MR Egger                  | 198.8578 | 106 | 1E-07 | Heterogeneity_tests | MDD            | HDL_L         |
| Inverse variance weighted | 200.7227 | 107 | 1E-07 | Heterogeneity_tests | MDD            | HDL_PL        |
| MR Egger                  | 201.4649 | 106 | 1E-07 | Heterogeneity_tests | MDD            | L_VLDL_CE_pct |
| MR Egger                  | 198.4867 | 106 | 1E-07 | Heterogeneity_tests | MDD            | M_HDL_CE_pct  |
| Inverse variance weighted | 203.0335 | 107 | 1E-07 | Heterogeneity_tests | MDD            | M_HDL_CE_pct  |
| Inverse variance weighted | 202.8151 | 107 | 1E-07 | Heterogeneity_tests | MDD            | M_HDL_FC      |
| Inverse variance weighted | 202.8205 | 107 | 1E-07 | Heterogeneity_tests | MDD            | M_HDL_TG_pct  |
| MR Egger                  | 201.8232 | 106 | 1E-07 | Heterogeneity_tests | MDD            | Omega_6_pct   |
| MR Egger                  | 199.7033 | 106 | 1E-07 | Heterogeneity_tests | MDD            | S_HDL_FC_pct  |
| Inverse variance weighted | 200.7929 | 107 | 1E-07 | Heterogeneity_tests | MDD            | S_HDL_FC_pct  |
| Inverse variance weighted | 202.252  | 107 | 1E-07 | Heterogeneity_tests | MDD            | S_HDL_TG_pct  |
| MR Egger                  | 201.3544 | 106 | 1E-07 | Heterogeneity_tests | MDD            | TG_by_PG      |
| MR Egger                  | 200.1753 | 106 | 1E-07 | Heterogeneity_tests | MDD            | VLDL_size     |
| MR Egger                  | 200.3421 | 106 | 1E-07 | Heterogeneity_tests | MDD            | XXL_VLDL_C    |
| Inverse variance weighted | 201.9046 | 107 | 1E-07 | Heterogeneity_tests | MDD            | XXL_VLDL_CE   |
| MR Egger                  | 201.309  | 106 | 1E-07 | Heterogeneity_tests | MDD            | XXL_VLDL_FC   |
| MR Egger                  | 199.0081 | 106 | 1E-07 | Heterogeneity_tests | MDD            | XXL_VLDL_L    |
| MR Egger                  | 199.2341 | 106 | 1E-07 | Heterogeneity_tests | MDD            | XXL_VLDL_P    |
| MR Egger                  | 199.7534 | 106 | 1E-07 | Heterogeneity_tests | MDD            | XXL_VLDL_PL   |
| MR Egger                  | 198.2372 | 106 | 1E-07 | Heterogeneity_tests | MDD            | XXL_VLDL_TG   |
| MR Egger                  | 193.8073 | 102 | 1E-07 | Heterogeneity_tests | M_HDL_C        | MDD           |
| Inverse variance weighted | 195.7396 | 103 | 1E-07 | Heterogeneity_tests | M_HDL_C        | MDD           |
| MR Egger                  | 219.7198 | 119 | 1E-07 | Heterogeneity_tests | M_HDL_TG_pct   | MDD           |
| Inverse variance weighted | 220.1964 | 120 | 1E-07 | Heterogeneity_tests | M_HDL_TG_pct   | MDD           |
| Inverse variance weighted | 194.8952 | 103 | 1E-07 | Heterogeneity_tests | XL_VLDL_CE_pct | MDD           |
| MR Egger                  | 170.9156 | 87  | 2E-07 | Heterogeneity_tests | HDL_P          | MDD           |
| Inverse variance weighted | 224.261  | 126 | 2E-07 | Heterogeneity_tests | HDL_size       | MDD           |
| MR Egger                  | 236.866  | 136 | 2E-07 | Heterogeneity_tests | L_HDL_FC       | MDD           |
| Inverse variance weighted | 237.7203 | 137 | 2E-07 | Heterogeneity_tests | L_HDL_FC       | MDD           |
| Inverse variance weighted | 178.9754 | 92  | 2E-07 | Heterogeneity_tests | L_HDL_FC_pct   | MDD           |
| Inverse variance weighted | 206.0338 | 112 | 2E-07 | Heterogeneity_tests | L_HDL_PL_pct   | MDD           |
| MR Egger                  | 245.6161 | 143 | 2E-07 | Heterogeneity_tests | L_HDL_P        | MDD           |
| Inverse variance weighted | 246.2729 | 144 | 2E-07 | Heterogeneity_tests | L_HDL_P        | MDD           |
| Inverse variance weighted | 197.6529 | 107 | 2E-07 | Heterogeneity_tests | MDD            | M_HDL_P       |
| MR Egger                  | 198.0732 | 106 | 2E-07 | Heterogeneity_tests | MDD            | M_HDL_TG_pct  |
| MR Egger                  | 196.7294 | 106 | 2E-07 | Heterogeneity_tests | MDD            | MUFA          |
| Inverse variance weighted | 198.2711 | 107 | 2E-07 | Heterogeneity_tests | MDD            | MUFA          |
| MR Egger                  | 197.696  | 106 | 2E-07 | Heterogeneity_tests | MDD            | S_HDL_TG_pct  |
| MR Egger                  | 196.2483 | 106 | 2E-07 | Heterogeneity_tests | MDD            | XL_HDL_FC_pct |
| MR Egger                  | 197.786  | 106 | 2E-07 | Heterogeneity_tests | MDD            | XXL_VLDL_CE   |
| MR Egger                  | 218.4015 | 122 | 2E-07 | Heterogeneity_tests | XL_HDL_FC_pct  | MDD           |
| Inverse variance weighted | 220.4492 | 123 | 2E-07 | Heterogeneity_tests | XL_HDL_FC_pct  | MDD           |
| MR Egger                  | 190.8252 | 102 | 2E-07 | Heterogeneity_tests | XL_VLDL_CE_pct | MDD           |

|                           |          |     |         |                     |                |               |
|---------------------------|----------|-----|---------|---------------------|----------------|---------------|
| Inverse variance weighted | 171.2451 | 88  | 3E-07   | Heterogeneity_tests | HDL_P          | MDD           |
| MR Egger                  | 175.2863 | 91  | 3E-07   | Heterogeneity_tests | L_HDL_FC_pct   | MDD           |
| Inverse variance weighted | 196.5948 | 107 | 3E-07   | Heterogeneity_tests | MDD            | HDL_P         |
| Inverse variance weighted | 196.5187 | 107 | 3E-07   | Heterogeneity_tests | MDD            | M_HDL_C       |
| MR Egger                  | 194.5872 | 106 | 3E-07   | Heterogeneity_tests | MDD            | M_HDL_FC      |
| MR Egger                  | 195.8493 | 106 | 3E-07   | Heterogeneity_tests | MDD            | S_VLDL_C_pct  |
| Inverse variance weighted | 196.1143 | 107 | 3E-07   | Heterogeneity_tests | MDD            | S_VLDL_C_pct  |
| Inverse variance weighted | 197.3065 | 107 | 3E-07   | Heterogeneity_tests | MDD            | VLDL_TG       |
| Inverse variance weighted | 197.3122 | 107 | 3E-07   | Heterogeneity_tests | MDD            | XL_VLDL_L     |
| MR Egger                  | 207.8637 | 115 | 3E-07   | Heterogeneity_tests | M_HDL_CE_pct   | MDD           |
| Inverse variance weighted | 207.8907 | 116 | 3E-07   | Heterogeneity_tests | M_HDL_CE_pct   | MDD           |
| Inverse variance weighted | 194.9265 | 107 | 4E-07   | Heterogeneity_tests | MDD            | Total_TG      |
| Inverse variance weighted | 195.3151 | 107 | 4E-07   | Heterogeneity_tests | MDD            | XL_VLDL_P     |
| MR Egger                  | 193.4717 | 106 | 5E-07   | Heterogeneity_tests | MDD            | ApoA1         |
| MR Egger                  | 193.4594 | 106 | 5E-07   | Heterogeneity_tests | MDD            | HDL_TG        |
| Inverse variance weighted | 194.5269 | 107 | 5E-07   | Heterogeneity_tests | MDD            | Total_P       |
| MR Egger                  | 191.9656 | 106 | 6E-07   | Heterogeneity_tests | MDD            | HDL_P         |
| MR Egger                  | 191.9628 | 106 | 6E-07   | Heterogeneity_tests | MDD            | HDL_PL        |
| Inverse variance weighted | 193.6854 | 107 | 6E-07   | Heterogeneity_tests | MDD            | HDL_TG        |
| Inverse variance weighted | 193.9882 | 107 | 6E-07   | Heterogeneity_tests | MDD            | M_HDL_CE      |
| MR Egger                  | 191.377  | 106 | 7E-07   | Heterogeneity_tests | MDD            | Total_P       |
| MR Egger                  | 190.5892 | 106 | 9E-07   | Heterogeneity_tests | MDD            | IDL_C_pct     |
| MR Egger                  | 190.5744 | 106 | 9E-07   | Heterogeneity_tests | MDD            | VLDL_TG       |
| MR Egger                  | 190.1527 | 106 | 1E-06   | Heterogeneity_tests | MDD            | S_IDL_PL_pct  |
| MR Egger                  | 189.8453 | 106 | 1.1E-06 | Heterogeneity_tests | MDD            | Total_TG      |
| Inverse variance weighted | 190.601  | 107 | 1.2E-06 | Heterogeneity_tests | MDD            | IDL_C_pct     |
| MR Egger                  | 189.3647 | 106 | 1.2E-06 | Heterogeneity_tests | MDD            | M_HDL_P       |
| MR Egger                  | 194.7631 | 110 | 1.2E-06 | Heterogeneity_tests | M_HDL_FC_pct   | MDD           |
| Inverse variance weighted | 190.1777 | 107 | 1.3E-06 | Heterogeneity_tests | MDD            | S_IDL_PL_pct  |
| MR Egger                  | 188.7555 | 106 | 1.4E-06 | Heterogeneity_tests | MDD            | XL_VLDL_L     |
| Inverse variance weighted | 194.9434 | 111 | 1.5E-06 | Heterogeneity_tests | M_HDL_FC_pct   | MDD           |
| Inverse variance weighted | 189.462  | 107 | 1.6E-06 | Heterogeneity_tests | MDD            | L_VLDL_TG     |
| Inverse variance weighted | 189.1552 | 107 | 1.7E-06 | Heterogeneity_tests | MDD            | XL_VLDL_PL    |
| MR Egger                  | 196.6594 | 113 | 1.8E-06 | Heterogeneity_tests | XL_HDL_PL      | MDD           |
| MR Egger                  | 187.3329 | 106 | 1.9E-06 | Heterogeneity_tests | MDD            | XL_VLDL_P     |
| MR Egger                  | 187.0558 | 106 | 2E-06   | Heterogeneity_tests | MDD            | M_HDL_C       |
| Inverse variance weighted | 197.6412 | 114 | 2E-06   | Heterogeneity_tests | XL_HDL_PL      | MDD           |
| MR Egger                  | 190.5283 | 109 | 2.2E-06 | Heterogeneity_tests | HDL_FC         | MDD           |
| MR Egger                  | 185.1815 | 105 | 2.3E-06 | Heterogeneity_tests | XS_VLDL_CE_pct | MDD           |
| MR Egger                  | 186.0057 | 106 | 2.6E-06 | Heterogeneity_tests | MDD            | S_HDL_C_pct   |
| MR Egger                  | 204.1568 | 120 | 2.6E-06 | Heterogeneity_tests | M_HDL_PL_pct   | MDD           |
| MR Egger                  | 216.8222 | 130 | 2.7E-06 | Heterogeneity_tests | L_HDL_PL       | MDD           |
| MR Egger                  | 207.7632 | 123 | 2.8E-06 | Heterogeneity_tests | TG_by_PG       | MDD           |
| Inverse variance weighted | 117.4018 | 56  | 3E-06   | Heterogeneity_tests | Ala            | MDD           |
| Inverse variance weighted | 190.5622 | 110 | 3E-06   | Heterogeneity_tests | HDL_FC         | MDD           |
| Inverse variance weighted | 186.4075 | 107 | 3.1E-06 | Heterogeneity_tests | MDD            | L_VLDL_PL     |
| Inverse variance weighted | 185.1897 | 106 | 3.1E-06 | Heterogeneity_tests | XS_VLDL_CE_pct | MDD           |
| Inverse variance weighted | 208.1425 | 124 | 3.3E-06 | Heterogeneity_tests | TG_by_PG       | MDD           |
| MR Egger                  | 115.5326 | 55  | 3.4E-06 | Heterogeneity_tests | Ala            | MDD           |
| Inverse variance weighted | 186.0938 | 107 | 3.4E-06 | Heterogeneity_tests | MDD            | S_HDL_C_pct   |
| Inverse variance weighted | 204.2047 | 121 | 3.4E-06 | Heterogeneity_tests | M_HDL_PL_pct   | MDD           |
| Inverse variance weighted | 216.8845 | 131 | 3.5E-06 | Heterogeneity_tests | L_HDL_PL       | MDD           |
| Inverse variance weighted | 185.9072 | 107 | 3.5E-06 | Heterogeneity_tests | MDD            | L_VLDL_PL_pct |
| MR Egger                  | 184.309  | 106 | 3.8E-06 | Heterogeneity_tests | MDD            | M_HDL_CE      |
| Inverse variance weighted | 185.3979 | 107 | 3.9E-06 | Heterogeneity_tests | MDD            | S_VLDL_TG     |
| MR Egger                  | 183.1547 | 106 | 4.9E-06 | Heterogeneity_tests | MDD            | S_VLDL_TG     |
| MR Egger                  | 183.0552 | 106 | 5E-06   | Heterogeneity_tests | MDD            | L_VLDL_PL_pct |
| MR Egger                  | 182.5227 | 106 | 5.6E-06 | Heterogeneity_tests | MDD            | IDL_FC        |
| Inverse variance weighted | 177.7167 | 103 | 6.8E-06 | Heterogeneity_tests | XL_HDL_P       | MDD           |
| Inverse variance weighted | 182.857  | 107 | 6.9E-06 | Heterogeneity_tests | MDD            | L_VLDL_L      |
| MR Egger                  | 176.3057 | 102 | 7E-06   | Heterogeneity_tests | XL_HDL_P       | MDD           |
| Inverse variance weighted | 182.6962 | 107 | 7.2E-06 | Heterogeneity_tests | MDD            | IDL_FC        |

|                           |          |     |         |                     |               |              |
|---------------------------|----------|-----|---------|---------------------|---------------|--------------|
| MR Egger                  | 183.4453 | 108 | 8.1E-06 | Heterogeneity_tests | L_HDL_CE_pct  | MDD          |
| MR Egger                  | 180.573  | 106 | 8.6E-06 | Heterogeneity_tests | MDD           | XL_VLDL_PL   |
| Inverse variance weighted | 181.5257 | 107 | 9.2E-06 | Heterogeneity_tests | MDD           | L_VLDL_P     |
| Inverse variance weighted | 186.6848 | 111 | 9.2E-06 | Heterogeneity_tests | XL_HDL_L      | MDD          |
| MR Egger                  | 185.2622 | 110 | 9.5E-06 | Heterogeneity_tests | XL_HDL_L      | MDD          |
| Inverse variance weighted | 183.7957 | 109 | 9.9E-06 | Heterogeneity_tests | L_HDL_CE_pct  | MDD          |
| MR Egger                  | 179.8713 | 106 | 0.00001 | Heterogeneity_tests | MDD           | L_VLDL_TG    |
| Inverse variance weighted | 180.8697 | 107 | 1.1E-05 | Heterogeneity_tests | MDD           | XL_VLDL_FC   |
| MR Egger                  | 178.19   | 106 | 1.4E-05 | Heterogeneity_tests | MDD           | L_VLDL_PL    |
| MR Egger                  | 197.2193 | 121 | 1.5E-05 | Heterogeneity_tests | XL_HDL_C      | MDD          |
| MR Egger                  | 178.0027 | 106 | 1.5E-05 | Heterogeneity_tests | MDD           | L_LDL_TG_pct |
| Inverse variance weighted | 173.9506 | 103 | 1.6E-05 | Heterogeneity_tests | XL_VLDL_C_pct | MDD          |
| MR Egger                  | 172.5675 | 102 | 1.6E-05 | Heterogeneity_tests | XL_VLDL_C_pct | MDD          |
| Inverse variance weighted | 197.32   | 122 | 1.9E-05 | Heterogeneity_tests | XL_HDL_C      | MDD          |
| Inverse variance weighted | 178.0371 | 107 | 2E-05   | Heterogeneity_tests | MDD           | L_LDL_TG_pct |
| MR Egger                  | 171.5035 | 102 | 2E-05   | Heterogeneity_tests | XS_VLDL_C_pct | MDD          |
| Inverse variance weighted | 177.0602 | 107 | 2.4E-05 | Heterogeneity_tests | MDD           | M_VLDL_TG    |
| MR Egger                  | 190.8669 | 118 | 2.5E-05 | Heterogeneity_tests | XL_HDL_TG_pct | MDD          |
| Inverse variance weighted | 171.6248 | 103 | 2.6E-05 | Heterogeneity_tests | XS_VLDL_C_pct | MDD          |
| Inverse variance weighted | 176.661  | 107 | 2.6E-05 | Heterogeneity_tests | MDD           | L_VLDL_FC    |
| MR Egger                  | 192.9224 | 120 | 2.7E-05 | Heterogeneity_tests | S_HDL_TG_pct  | MDD          |
| Inverse variance weighted | 190.9032 | 119 | 3.2E-05 | Heterogeneity_tests | XL_HDL_TG_pct | MDD          |
| Inverse variance weighted | 193.2505 | 121 | 3.3E-05 | Heterogeneity_tests | S_HDL_TG_pct  | MDD          |
| MR Egger                  | 174.1333 | 106 | 3.4E-05 | Heterogeneity_tests | MDD           | L_VLDL_L     |
| MR Egger                  | 173.7589 | 106 | 3.7E-05 | Heterogeneity_tests | MDD           | L_VLDL_P     |
| MR Egger                  | 143.8299 | 83  | 4E-05   | Heterogeneity_tests | Total_P       | MDD          |
| MR Egger                  | 173.0307 | 106 | 4.3E-05 | Heterogeneity_tests | MDD           | XL_VLDL_FC   |
| Inverse variance weighted | 143.8437 | 84  | 5.3E-05 | Heterogeneity_tests | Total_P       | MDD          |
| MR Egger                  | 171.7006 | 106 | 5.6E-05 | Heterogeneity_tests | MDD           | M_LDL_TG_pct |
| MR Egger                  | 147.2696 | 87  | 5.8E-05 | Heterogeneity_tests | XL_VLDL_CE    | MDD          |
| MR Egger                  | 176.5544 | 110 | 5.9E-05 | Heterogeneity_tests | VLDL_size     | MDD          |
| Inverse variance weighted | 148.3337 | 88  | 6.1E-05 | Heterogeneity_tests | XL_VLDL_CE    | MDD          |
| MR Egger                  | 158.5322 | 96  | 6.2E-05 | Heterogeneity_tests | L_VLDL_PL     | MDD          |
| Inverse variance weighted | 172.3716 | 107 | 6.4E-05 | Heterogeneity_tests | MDD           | M_LDL_TG_pct |
| Inverse variance weighted | 197.0839 | 127 | 6.7E-05 | Heterogeneity_tests | HDL_CE        | MDD          |
| MR Egger                  | 170.8289 | 106 | 6.7E-05 | Heterogeneity_tests | MDD           | M_VLDL_TG    |
| MR Egger                  | 183.334  | 116 | 6.8E-05 | Heterogeneity_tests | S_HDL_TG      | MDD          |
| Inverse variance weighted | 176.739  | 111 | 7.3E-05 | Heterogeneity_tests | VLDL_size     | MDD          |
| Inverse variance weighted | 183.8845 | 117 | 7.8E-05 | Heterogeneity_tests | S_HDL_TG      | MDD          |
| Inverse variance weighted | 158.6814 | 97  | 7.9E-05 | Heterogeneity_tests | L_VLDL_PL     | MDD          |
| MR Egger                  | 153.5581 | 93  | 7.9E-05 | Heterogeneity_tests | S_VLDL_L      | MDD          |
| MR Egger                  | 155.9823 | 95  | 8.1E-05 | Heterogeneity_tests | L_VLDL_P      | MDD          |
| Inverse variance weighted | 148.2652 | 89  | 8.2E-05 | Heterogeneity_tests | L_VLDL_C      | MDD          |
| MR Egger                  | 164.7877 | 102 | 8.2E-05 | Heterogeneity_tests | IDL_C_pct     | MDD          |
| MR Egger                  | 194.6361 | 126 | 8.5E-05 | Heterogeneity_tests | HDL_CE        | MDD          |
| MR Egger                  | 178.3531 | 113 | 8.7E-05 | Heterogeneity_tests | L_HDL_TG_pct  | MDD          |
| MR Egger                  | 145.2057 | 87  | 9.2E-05 | Heterogeneity_tests | PUFA_by_MUFA  | MDD          |
| MR Egger                  | 146.4466 | 88  | 9.2E-05 | Heterogeneity_tests | L_VLDL_C      | MDD          |
| Inverse variance weighted | 153.9157 | 94  | 9.6E-05 | Heterogeneity_tests | S_VLDL_L      | MDD          |
| Inverse variance weighted | 170.2508 | 107 | 9.8E-05 | Heterogeneity_tests | MDD           | S_LDL_TG     |
| Inverse variance weighted | 166.4637 | 104 | 9.8E-05 | Heterogeneity_tests | S_LDL_TG_pct  | MDD          |
| MR Egger                  | 168.9391 | 106 | 9.9E-05 | Heterogeneity_tests | MDD           | IDL_C        |
| Inverse variance weighted | 156.033  | 96  | 0.0001  | Heterogeneity_tests | L_VLDL_P      | MDD          |
| Inverse variance weighted | 164.8308 | 103 | 0.00011 | Heterogeneity_tests | IDL_C_pct     | MDD          |
| MR Egger                  | 168.5391 | 106 | 0.00011 | Heterogeneity_tests | MDD           | L_VLDL_FC    |
| Inverse variance weighted | 145.646  | 88  | 0.00011 | Heterogeneity_tests | PUFA_by_MUFA  | MDD          |
| Inverse variance weighted | 150.7398 | 92  | 0.00011 | Heterogeneity_tests | HDL_TG        | MDD          |
| Inverse variance weighted | 178.3535 | 114 | 0.00011 | Heterogeneity_tests | L_HDL_TG_pct  | MDD          |
| MR Egger                  | 151.8042 | 93  | 0.00011 | Heterogeneity_tests | L_VLDL_FC     | MDD          |
| MR Egger                  | 164.403  | 103 | 0.00012 | Heterogeneity_tests | S_LDL_TG_pct  | MDD          |
| Inverse variance weighted | 169.2026 | 107 | 0.00012 | Heterogeneity_tests | MDD           | IDL_C        |
| MR Egger                  | 115.3412 | 65  | 0.00012 | Heterogeneity_tests | LA_pct        | MDD          |

|                           |          |     |         |                     |               |            |
|---------------------------|----------|-----|---------|---------------------|---------------|------------|
| Inverse variance weighted | 152.6594 | 94  | 0.00012 | Heterogeneity_tests | L_VLDL_FC     | MDD        |
| MR Egger                  | 167.5129 | 106 | 0.00013 | Heterogeneity_tests | MDD           | S_LDL_TG   |
| MR Egger                  | 152.2761 | 94  | 0.00014 | Heterogeneity_tests | XXL_VLDL_CE   | MDD        |
| Inverse variance weighted | 168.4597 | 107 | 0.00014 | Heterogeneity_tests | MDD           | VLDL_L     |
| MR Egger                  | 148.2113 | 91  | 0.00014 | Heterogeneity_tests | HDL_TG        | MDD        |
| Inverse variance weighted | 115.3413 | 66  | 0.00017 | Heterogeneity_tests | LA_pct        | MDD        |
| Inverse variance weighted | 139.8602 | 85  | 0.00017 | Heterogeneity_tests | VLDL_FC       | MDD        |
| MR Egger                  | 138.3794 | 84  | 0.00017 | Heterogeneity_tests | VLDL_FC       | MDD        |
| Inverse variance weighted | 152.2852 | 95  | 0.00017 | Heterogeneity_tests | XXL_VLDL_CE   | MDD        |
| Inverse variance weighted | 142.6976 | 88  | 0.0002  | Heterogeneity_tests | M_VLDL_FC_pct | MDD        |
| MR Egger                  | 165.0257 | 106 | 0.00021 | Heterogeneity_tests | MDD           | Total_CE   |
| Inverse variance weighted | 183.3461 | 121 | 0.00022 | Heterogeneity_tests | HDL_C         | MDD        |
| MR Egger                  | 140.8686 | 87  | 0.00023 | Heterogeneity_tests | M_VLDL_FC_pct | MDD        |
| Inverse variance weighted | 165.8071 | 107 | 0.00023 | Heterogeneity_tests | MDD           | XL_VLDL_C  |
| MR Egger                  | 164.4896 | 106 | 0.00024 | Heterogeneity_tests | MDD           | XS_VLDL_TG |
| MR Egger                  | 164.35   | 106 | 0.00024 | Heterogeneity_tests | MDD           | IDL_CE     |
| MR Egger                  | 181.4919 | 120 | 0.00025 | Heterogeneity_tests | HDL_C         | MDD        |
| MR Egger                  | 156.7372 | 100 | 0.00025 | Heterogeneity_tests | XXL_VLDL_PL   | MDD        |
| Inverse variance weighted | 165.3655 | 107 | 0.00025 | Heterogeneity_tests | MDD           | XS_VLDL_TG |
| Inverse variance weighted | 157.8193 | 101 | 0.00026 | Heterogeneity_tests | XXL_VLDL_PL   | MDD        |
| Inverse variance weighted | 165.0267 | 107 | 0.00027 | Heterogeneity_tests | MDD           | Total_CE   |
| Inverse variance weighted | 164.6486 | 107 | 0.00029 | Heterogeneity_tests | MDD           | IDL_CE     |
| MR Egger                  | 155.583  | 100 | 0.00031 | Heterogeneity_tests | M_LDL_TG      | MDD        |
| MR Egger                  | 162.0544 | 106 | 0.00038 | Heterogeneity_tests | MDD           | VLDL_L     |
| Inverse variance weighted | 124.5279 | 76  | 0.00038 | Heterogeneity_tests | Total_CE      | MDD        |
| MR Egger                  | 171.7486 | 114 | 0.00039 | Heterogeneity_tests | M_HDL_C_pct   | MDD        |
| MR Egger                  | 149.5455 | 96  | 0.00039 | Heterogeneity_tests | MUFA_pct      | MDD        |
| Inverse variance weighted | 155.6433 | 101 | 0.00039 | Heterogeneity_tests | M_LDL_TG      | MDD        |
| MR Egger                  | 161.478  | 106 | 0.00042 | Heterogeneity_tests | XL_HDL_FC     | MDD        |
| Inverse variance weighted | 162.409  | 107 | 0.00044 | Heterogeneity_tests | XL_HDL_FC     | MDD        |
| MR Egger                  | 161.0962 | 106 | 0.00045 | Heterogeneity_tests | MDD           | IDL_L      |
| Inverse variance weighted | 149.7387 | 97  | 0.00047 | Heterogeneity_tests | MUFA_pct      | MDD        |
| Inverse variance weighted | 171.7554 | 115 | 0.00048 | Heterogeneity_tests | M_HDL_C_pct   | MDD        |
| MR Egger                  | 158.1691 | 104 | 0.00049 | Heterogeneity_tests | S_LDL_TG      | MDD        |
| MR Egger                  | 121.71   | 75  | 0.00053 | Heterogeneity_tests | Total_CE      | MDD        |
| Inverse variance weighted | 161.4142 | 107 | 0.00053 | Heterogeneity_tests | MDD           | IDL_L      |
| Inverse variance weighted | 161.3163 | 107 | 0.00054 | Heterogeneity_tests | MDD           | L_VLDL_C   |
| Inverse variance weighted | 138.9221 | 89  | 0.00056 | Heterogeneity_tests | MUFA          | MDD        |
| MR Egger                  | 142.5384 | 92  | 0.00058 | Heterogeneity_tests | IDL_CE_pct    | MDD        |
| Inverse variance weighted | 158.3034 | 105 | 0.0006  | Heterogeneity_tests | S_LDL_TG      | MDD        |
| MR Egger                  | 136.5003 | 88  | 0.00071 | Heterogeneity_tests | MUFA          | MDD        |
| Inverse variance weighted | 142.6645 | 93  | 0.00071 | Heterogeneity_tests | IDL_CE_pct    | MDD        |
| MR Egger                  | 158.4556 | 106 | 0.00073 | Heterogeneity_tests | MDD           | IDL_CE_pct |
| MR Egger                  | 157.2003 | 105 | 0.00074 | Heterogeneity_tests | XL_VLDL_P     | MDD        |
| MR Egger                  | 144.6359 | 95  | 0.00078 | Heterogeneity_tests | IDL_TG        | MDD        |
| MR Egger                  | 117.1816 | 73  | 0.0008  | Heterogeneity_tests | IDL_L         | MDD        |
| MR Egger                  | 157.953  | 106 | 0.0008  | Heterogeneity_tests | MDD           | XL_VLDL_C  |
| Inverse variance weighted | 148.1875 | 98  | 0.0008  | Heterogeneity_tests | M_VLDL_TG_pct | MDD        |
| MR Egger                  | 142.9286 | 94  | 0.00086 | Heterogeneity_tests | M_VLDL_TG     | MDD        |
| MR Egger                  | 178.0626 | 123 | 0.00087 | Heterogeneity_tests | XL_HDL_CE     | MDD        |
| Inverse variance weighted | 145.1312 | 96  | 0.0009  | Heterogeneity_tests | IDL_TG        | MDD        |
| Inverse variance weighted | 158.4774 | 107 | 0.00091 | Heterogeneity_tests | MDD           | IDL_CE_pct |
| Inverse variance weighted | 157.2026 | 106 | 0.00092 | Heterogeneity_tests | XL_VLDL_P     | MDD        |
| MR Egger                  | 155.8374 | 105 | 0.00095 | Heterogeneity_tests | L_VLDL_PL_pct | MDD        |
| Inverse variance weighted | 117.2756 | 74  | 0.00101 | Heterogeneity_tests | IDL_L         | MDD        |
| Inverse variance weighted | 178.2206 | 124 | 0.00103 | Heterogeneity_tests | XL_HDL_CE     | MDD        |
| MR Egger                  | 147.8664 | 99  | 0.00107 | Heterogeneity_tests | XXL_VLDL_FC   | MDD        |
| Inverse variance weighted | 142.975  | 95  | 0.00107 | Heterogeneity_tests | M_VLDL_TG     | MDD        |
| MR Egger                  | 137.7977 | 91  | 0.00113 | Heterogeneity_tests | S_VLDL_FC_pct | MDD        |
| Inverse variance weighted | 156.0444 | 106 | 0.00113 | Heterogeneity_tests | L_VLDL_PL_pct | MDD        |
| Inverse variance weighted | 148.4107 | 100 | 0.00121 | Heterogeneity_tests | XXL_VLDL_FC   | MDD        |
| Inverse variance weighted | 137.3051 | 91  | 0.00124 | Heterogeneity_tests | L_VLDL_CE_pct | MDD        |



|                           |          |     |         |                     |                |                 |
|---------------------------|----------|-----|---------|---------------------|----------------|-----------------|
| Inverse variance weighted | 138.4031 | 92  | 0.00127 | Heterogeneity_tests | S_VLDL_FC_pct  | MDD             |
| Inverse variance weighted | 152.3168 | 104 | 0.00143 | Heterogeneity_tests | Total_TG       | MDD             |
| MR Egger                  | 144.6928 | 98  | 0.00152 | Heterogeneity_tests | S_VLDL_P       | MDD             |
| Inverse variance weighted | 125.0619 | 82  | 0.00155 | Heterogeneity_tests | Sphingomyelins | MDD             |
| MR Egger                  | 154.0553 | 106 | 0.00161 | Heterogeneity_tests | MDD            | L_VLDL_C        |
| MR Egger                  | 134.5153 | 90  | 0.00166 | Heterogeneity_tests | L_VLDL_CE_pct  | MDD             |
| Inverse variance weighted | 145.3191 | 99  | 0.00169 | Heterogeneity_tests | S_VLDL_P       | MDD             |
| MR Egger                  | 156.0817 | 108 | 0.00171 | Heterogeneity_tests | XL_VLDL_TG     | MDD             |
| MR Egger                  | 109.5437 | 70  | 0.00177 | Heterogeneity_tests | PUFA_pct       | MDD             |
| MR Egger                  | 103.2693 | 65  | 0.00177 | Heterogeneity_tests | S_LDL_PL_pct   | MDD             |
| MR Egger                  | 126.7342 | 84  | 0.0018  | Heterogeneity_tests | XL_VLDL_C      | MDD             |
| MR Egger                  | 142.534  | 97  | 0.00181 | Heterogeneity_tests | XXL_VLDL_L     | MDD             |
| MR Egger                  | 149.5901 | 103 | 0.00186 | Heterogeneity_tests | Total_TG       | MDD             |
| MR Egger                  | 144.7549 | 99  | 0.00187 | Heterogeneity_tests | XXL_VLDL_C     | MDD             |
| MR Egger                  | 127.708  | 85  | 0.00189 | Heterogeneity_tests | XL_VLDL_TG_pct | MDD             |
| Inverse variance weighted | 128.8796 | 86  | 0.00191 | Heterogeneity_tests | XL_VLDL_TG_pct | MDD             |
| Inverse variance weighted | 156.4748 | 109 | 0.00196 | Heterogeneity_tests | XL_VLDL_TG     | MDD             |
| MR Egger                  | 140.8476 | 96  | 0.00197 | Heterogeneity_tests | XXL_VLDL_P     | MDD             |
| MR Egger                  | 142.0097 | 97  | 0.00198 | Heterogeneity_tests | M_VLDL_TG_pct  | MDD             |
| Inverse variance weighted | 127.326  | 85  | 0.00203 | Heterogeneity_tests | XL_VLDL_C      | MDD             |
| Inverse variance weighted | 142.9299 | 98  | 0.00209 | Heterogeneity_tests | XXL_VLDL_L     | MDD             |
| Inverse variance weighted | 153.6003 | 107 | 0.00213 | Heterogeneity_tests | MDD            | VLDL_PL         |
| MR Egger                  | 167.7005 | 119 | 0.0022  | Heterogeneity_tests | L_HDL_C_pct    | MDD             |
| Inverse variance weighted | 109.6683 | 71  | 0.00221 | Heterogeneity_tests | PUFA_pct       | MDD             |
| Inverse variance weighted | 103.4139 | 66  | 0.00223 | Heterogeneity_tests | S_LDL_PL_pct   | MDD             |
| Inverse variance weighted | 144.7711 | 100 | 0.0023  | Heterogeneity_tests | XXL_VLDL_C     | MDD             |
| Inverse variance weighted | 148.3309 | 103 | 0.00232 | Heterogeneity_tests | M_VLDL_CE_pct  | MDD             |
| Inverse variance weighted | 140.9529 | 97  | 0.00239 | Heterogeneity_tests | XXL_VLDL_P     | MDD             |
| MR Egger                  | 121.5318 | 81  | 0.0024  | Heterogeneity_tests | Sphingomyelins | MDD             |
| Inverse variance weighted | 146.7829 | 102 | 0.00246 | Heterogeneity_tests | M_VLDL_C_pct   | MDD             |
| Inverse variance weighted | 167.9963 | 120 | 0.00253 | Heterogeneity_tests | L_HDL_C_pct    | MDD             |
| MR Egger                  | 145.2575 | 101 | 0.0026  | Heterogeneity_tests | M_VLDL_C_pct   | MDD             |
| Inverse variance weighted | 147.5161 | 103 | 0.00266 | Heterogeneity_tests | VLDL_TG        | MDD             |
| MR Egger                  | 126.7386 | 86  | 0.00282 | Heterogeneity_tests | VLDL_PL        | MDD             |
| MR Egger                  | 145.8732 | 102 | 0.00287 | Heterogeneity_tests | M_VLDL_CE_pct  | MDD             |
| Inverse variance weighted | 151.8037 | 107 | 0.00288 | Heterogeneity_tests | MDD            | M_LDL_TG        |
| Inverse variance weighted | 127.7249 | 87  | 0.00294 | Heterogeneity_tests | VLDL_PL        | MDD             |
| MR Egger                  | 145.524  | 102 | 0.00305 | Heterogeneity_tests | VLDL_TG        | MDD             |
| MR Egger                  | 136.9262 | 95  | 0.00317 | Heterogeneity_tests | S_VLDL_PL_pct  | MDD             |
| Inverse variance weighted | 129.6843 | 89  | 0.00319 | Heterogeneity_tests | L_VLDL_CE      | MDD             |
| MR Egger                  | 149.9293 | 106 | 0.00323 | Heterogeneity_tests | MDD            | M_LDL_TG        |
| Inverse variance weighted | 151.0752 | 107 | 0.00325 | Heterogeneity_tests | MDD            | XXL_VLDL_PL_pct |
| MR Egger                  | 150.964  | 107 | 0.00331 | Heterogeneity_tests | XL_VLDL_L      | MDD             |
| MR Egger                  | 108.8109 | 72  | 0.00332 | Heterogeneity_tests | IDL_FC         | MDD             |
| Inverse variance weighted | 137.0132 | 96  | 0.00383 | Heterogeneity_tests | S_VLDL_PL_pct  | MDD             |
| Inverse variance weighted | 109.2505 | 73  | 0.00386 | Heterogeneity_tests | IDL_FC         | MDD             |
| Inverse variance weighted | 151.1418 | 108 | 0.0039  | Heterogeneity_tests | XL_VLDL_L      | MDD             |
| MR Egger                  | 149.919  | 107 | 0.00393 | Heterogeneity_tests | XS_VLDL_TG     | MDD             |
| Inverse variance weighted | 149.8125 | 107 | 0.004   | Heterogeneity_tests | MDD            | XL_VLDL_CE      |
| MR Egger                  | 148.4705 | 106 | 0.00411 | Heterogeneity_tests | MDD            | XXL_VLDL_PL_pct |
| MR Egger                  | 126.9877 | 88  | 0.00415 | Heterogeneity_tests | L_VLDL_CE      | MDD             |
| Inverse variance weighted | 122.9055 | 85  | 0.00452 | Heterogeneity_tests | M_HDL_TG       | MDD             |
| MR Egger                  | 128.7289 | 90  | 0.00465 | Heterogeneity_tests | L_VLDL_L       | MDD             |
| MR Egger                  | 147.7012 | 106 | 0.00465 | Heterogeneity_tests | MDD            | VLDL_PL         |
| Inverse variance weighted | 149.938  | 108 | 0.00474 | Heterogeneity_tests | XS_VLDL_TG     | MDD             |
| Inverse variance weighted | 148.7033 | 107 | 0.00478 | Heterogeneity_tests | MDD            | L_VLDL_CE       |
| MR Egger                  | 134.4681 | 95  | 0.00482 | Heterogeneity_tests | XL_VLDL_PL     | MDD             |
| Inverse variance weighted | 135.544  | 96  | 0.00491 | Heterogeneity_tests | XL_VLDL_PL     | MDD             |
| MR Egger                  | 128.1853 | 90  | 0.0051  | Heterogeneity_tests | XL_VLDL_FC     | MDD             |
| Inverse variance weighted | 129.3366 | 91  | 0.00513 | Heterogeneity_tests | L_VLDL_L       | MDD             |
| MR Egger                  | 120.6561 | 84  | 0.00543 | Heterogeneity_tests | M_HDL_TG       | MDD             |
| MR Egger                  | 132.5586 | 94  | 0.00544 | Heterogeneity_tests | L_LDL_TG_pct   | MDD             |

|                           |           |     |         |                     |                |                |
|---------------------------|-----------|-----|---------|---------------------|----------------|----------------|
| Inverse variance weighted | 128.659   | 91  | 0.00575 | Heterogeneity_tests | XL_VLDL_FC     | MDD            |
| Inverse variance weighted | 133.1823  | 95  | 0.00597 | Heterogeneity_tests | L_LDL_TG_pct   | MDD            |
| MR Egger                  | 109.8712  | 76  | 0.0067  | Heterogeneity_tests | IDL_CE         | MDD            |
| MR Egger                  | 144.7668  | 106 | 0.00739 | Heterogeneity_tests | S_VLDL_TG      | MDD            |
| Inverse variance weighted | 145.7819  | 107 | 0.00756 | Heterogeneity_tests | S_VLDL_TG      | MDD            |
| MR Egger                  | 144.1183  | 106 | 0.00816 | Heterogeneity_tests | MDD            | IDL_TG         |
| Inverse variance weighted | 109.8832  | 77  | 0.00825 | Heterogeneity_tests | IDL_CE         | MDD            |
| Inverse variance weighted | 145.0994  | 107 | 0.00839 | Heterogeneity_tests | MDD            | VLDL_FC        |
| Inverse variance weighted | 100.18603 | 69  | 0.00842 | Heterogeneity_tests | Unsaturation   | MDD            |
| Inverse variance weighted | 145.0349  | 107 | 0.00848 | Heterogeneity_tests | MDD            | S_VLDL_L       |
| Inverse variance weighted | 144.7795  | 107 | 0.00881 | Heterogeneity_tests | MDD            | IDL_TG         |
| Inverse variance weighted | 144.7476  | 107 | 0.00885 | Heterogeneity_tests | MDD            | S_VLDL_P       |
| MR Egger                  | 134.1435  | 98  | 0.00901 | Heterogeneity_tests | L_VLDL_TG      | MDD            |
| MR Egger                  | 142.5843  | 106 | 0.0103  | Heterogeneity_tests | MDD            | XL_VLDL_CE     |
| MR Egger                  | 142.5219  | 106 | 0.0104  | Heterogeneity_tests | MDD            | L_VLDL_CE      |
| Inverse variance weighted | 134.2897  | 99  | 0.01056 | Heterogeneity_tests | L_VLDL_TG      | MDD            |
| MR Egger                  | 133.9465  | 99  | 0.01113 | Heterogeneity_tests | XS_VLDL_TG_pct | MDD            |
| MR Egger                  | 104.4001  | 74  | 0.01148 | Heterogeneity_tests | IDL_C          | MDD            |
| Inverse variance weighted | 134.5772  | 100 | 0.01206 | Heterogeneity_tests | XS_VLDL_TG_pct | MDD            |
| MR Egger                  | 115.6377  | 84  | 0.01261 | Heterogeneity_tests | S_HDL_FC_pct   | MDD            |
| MR Egger                  | 141.2209  | 106 | 0.01261 | Heterogeneity_tests | MDD            | S_VLDL_L       |
| MR Egger                  | 141.1155  | 106 | 0.01281 | Heterogeneity_tests | MDD            | Ala            |
| MR Egger                  | 140.8013  | 106 | 0.01341 | Heterogeneity_tests | MDD            | S_VLDL_P       |
| Inverse variance weighted | 104.4018  | 75  | 0.01403 | Heterogeneity_tests | IDL_C          | MDD            |
| Inverse variance weighted | 116.1253  | 85  | 0.01407 | Heterogeneity_tests | S_HDL_FC_pct   | MDD            |
| Inverse variance weighted | 70.74003  | 47  | 0.01415 | Heterogeneity_tests | Citrate        | MDD            |
| Inverse variance weighted | 141.4716  | 107 | 0.01438 | Heterogeneity_tests | MDD            | Ala            |
| MR Egger                  | 69.28695  | 46  | 0.01481 | Heterogeneity_tests | Citrate        | MDD            |
| MR Egger                  | 95.63135  | 68  | 0.01525 | Heterogeneity_tests | Unsaturation   | MDD            |
| Inverse variance weighted | 140.9114  | 107 | 0.01558 | Heterogeneity_tests | MDD            | M_VLDL_L       |
| MR Egger                  | 139.4552  | 106 | 0.01629 | Heterogeneity_tests | MDD            | VLDL_FC        |
| Inverse variance weighted | 140.3049  | 107 | 0.01699 | Heterogeneity_tests | MDD            | XS_VLDL_PL_pct |
| MR Egger                  | 115.7518  | 86  | 0.0179  | Heterogeneity_tests | VLDL_L         | MDD            |
| Inverse variance weighted | 116.4323  | 87  | 0.01926 | Heterogeneity_tests | VLDL_L         | MDD            |
| MR Egger                  | 137.3432  | 106 | 0.02192 | Heterogeneity_tests | MDD            | XS_VLDL_PL_pct |
| MR Egger                  | 106.9872  | 81  | 0.02819 | Heterogeneity_tests | M_VLDL_L       | MDD            |
| MR Egger                  | 135.4171  | 106 | 0.02847 | Heterogeneity_tests | MDD            | M_VLDL_L       |
| MR Egger                  | 107.7048  | 82  | 0.03006 | Heterogeneity_tests | XL_VLDL_FC_pct | MDD            |
| Inverse variance weighted | 107.3726  | 82  | 0.03157 | Heterogeneity_tests | M_VLDL_L       | MDD            |
| Inverse variance weighted | 108.2014  | 83  | 0.03306 | Heterogeneity_tests | XL_VLDL_FC_pct | MDD            |
| MR Egger                  | 87.67621  | 67  | 0.0459  | Heterogeneity_tests | IDL_FC_pct     | MDD            |
| Inverse variance weighted | 88.41712  | 68  | 0.04877 | Heterogeneity_tests | IDL_FC_pct     | MDD            |
| MR Egger                  | 92.63456  | 72  | 0.05128 | Heterogeneity_tests | XS_VLDL_FC_pct | MDD            |
| MR Egger                  | 107.1118  | 85  | 0.05284 | Heterogeneity_tests | XS_VLDL_PL_pct | MDD            |
| Inverse variance weighted | 92.67784  | 73  | 0.05989 | Heterogeneity_tests | XS_VLDL_FC_pct | MDD            |
| Inverse variance weighted | 107.142   | 86  | 0.06104 | Heterogeneity_tests | XS_VLDL_PL_pct | MDD            |
| MR Egger                  | 126.4409  | 106 | 0.0857  | Heterogeneity_tests | MDD            | Citrate        |
| Inverse variance weighted | 126.8679  | 107 | 0.09224 | Heterogeneity_tests | MDD            | Citrate        |
| MR Egger                  | 96.90448  | 80  | 0.09607 | Heterogeneity_tests | Omega_6_pct    | MDD            |
| Inverse variance weighted | 97.07442  | 81  | 0.10758 | Heterogeneity_tests | Omega_6_pct    | MDD            |
| MR Egger                  | 123.0445  | 106 | 0.12335 | Heterogeneity_tests | MDD            | Pyruvate       |
| Inverse variance weighted | 100.21337 | 85  | 0.12423 | Heterogeneity_tests | M_LDL_TG_pct   | MDD            |
| MR Egger                  | 99.05155  | 84  | 0.12526 | Heterogeneity_tests | M_LDL_TG_pct   | MDD            |
| MR Egger                  | 94.08053  | 80  | 0.1344  | Heterogeneity_tests | S_VLDL_C_pct   | MDD            |
| Inverse variance weighted | 123.147   | 107 | 0.13616 | Heterogeneity_tests | MDD            | Pyruvate       |
| MR Egger                  | 105.4789  | 91  | 0.14233 | Heterogeneity_tests | XXL_VLDL_TG    | MDD            |
| Inverse variance weighted | 94.08669  | 81  | 0.15168 | Heterogeneity_tests | S_VLDL_C_pct   | MDD            |
| Inverse variance weighted | 105.518   | 92  | 0.15862 | Heterogeneity_tests | XXL_VLDL_TG    | MDD            |
| MR Egger                  | 90.82898  | 81  | 0.21332 | Heterogeneity_tests | S_HDL_C_pct    | MDD            |
| Inverse variance weighted | 91.34875  | 82  | 0.22495 | Heterogeneity_tests | S_HDL_C_pct    | MDD            |
| MR Egger                  | 37.29465  | 32  | 0.23859 | Heterogeneity_tests | Pyruvate       | MDD            |
| MR Egger                  | 100.9931  | 92  | 0.24468 | Heterogeneity_tests | S_VLDL_TG_pct  | MDD            |

|                           |          |    |         |                     |                 |     |
|---------------------------|----------|----|---------|---------------------|-----------------|-----|
| Inverse variance weighted | 101.0899 | 93 | 0.26587 | Heterogeneity_tests | S_VLDL_TG_pct   | MDD |
| Inverse variance weighted | 37.58517 | 33 | 0.26715 | Heterogeneity_tests | Pyruvate        | MDD |
| MR Egger                  | 59.19662 | 54 | 0.29165 | Heterogeneity_tests | XXL_VLDL_PL_pct | MDD |
| Inverse variance weighted | 60.12855 | 55 | 0.29539 | Heterogeneity_tests | XXL_VLDL_PL_pct | MDD |

**eTable 9. Correlation between MDD and Microbiome metabolic signatures**

| microbe                      | id                                          | beta_lmm | se_lmm | pval_lmm | beta_lmm_mdd | se_lmm_mdd | pval_lmm_mdd | Corr_lmm | T_corr_lmm | P_corr   | FDR_corr |
|------------------------------|---------------------------------------------|----------|--------|----------|--------------|------------|--------------|----------|------------|----------|----------|
| ChristensenellaceaeR7group   | genus.ChristensenellaceaeR7group.id.11283   | -0.4549  | 0.0694 | 3.55E-04 | -1.0906      | 0.1587     | 3.31E-04     | -0.7043  | 11.5288    | 7.82E-22 | 2.46E-19 |
| Christensenellaceae          | family.Christensenellaceae.id.1866          | -0.4147  | 0.0585 | 1.69E-04 | -1.1043      | 0.1684     | 5.46E-04     | -0.6767  | 10.6799    | 1.12E-19 | 1.76E-17 |
| Ruminiclostridium6           | genus.Ruminiclostridium6.id.11356           | -0.6898  | 0.1181 | 2.65E-04 | -0.6308      | 0.0675     | 1.48E-08     | -0.6596  | 10.1974    | 1.86E-18 | 1.58E-16 |
| LachnospiraceaeNC2004group   | genus.LachnospiraceaeNC2004group.id.11316   | -0.6311  | 0.0814 | 2.86E-07 | -0.6885      | 0.1075     | 4.73E-03     | -0.6592  | 10.1847    | 2.00E-18 | 1.58E-16 |
| Eubacteriumxylanophilumgroup | genus.Eubacteriumxylanophilumgroup.id.14375 | -0.5621  | 0.0789 | 1.67E-03 | -0.7487      | 0.0914     | 4.77E-02     | -0.6487  | 9.9048     | 1.02E-17 | 4.59E-16 |
| Coprococcus1                 | genus.Coprococcus1.id.11301                 | -0.9752  | 0.1136 | 3.57E-05 | -0.4204      | 0.0497     | 3.11E-08     | -0.6403  | 9.6861     | 3.60E-17 | 1.42E-15 |
| RuminococcaceaeUCG014        | genus.RuminococcaceaeUCG014.id.11371        | -0.4728  | 0.0625 | 9.33E-04 | -0.8558      | 0.1024     | 3.42E-04     | -0.6361  | 9.5783     | 6.71E-17 | 2.35E-15 |
| LachnospiraceaeAC2044group   | genus.LachnospiraceaeAC2044group.id.11313   | -1.0770  | 0.2874 | 3.48E-03 | -0.3637      | 0.0978     | 4.34E-02     | -0.6258  | 9.3231     | 2.91E-16 | 8.36E-15 |
| RuminococcaceaeUCG005        | genus.RuminococcaceaeUCG005.id.11363        | -0.3990  | 0.0558 | 3.19E-09 | -0.9816      | 0.1668     | 1.73E-03     | -0.6258  | 9.3222     | 2.92E-16 | 8.36E-15 |
| RuminococcaceaeUCG009        | genus.RuminococcaceaeUCG009.id.11366        | -1.0430  | 0.1394 | 6.89E-04 | -0.3519      | 0.0684     | 2.36E-03     | -0.6058  | 8.8470     | 4.40E-15 | 1.07E-13 |
| RuminococcaceaeUCG007        | genus.RuminococcaceaeUCG007.id.11364        | -0.8979  | 0.1125 | 1.19E-08 | -0.4037      | 0.0903     | 3.96E-03     | -0.6020  | 8.7608     | 7.16E-15 | 1.61E-13 |
| Lachnoclostridium            | genus.Lachnoclostridium.id.11308            | 0.5713   | 0.0644 | 1.14E-05 | 0.6307       | 0.0832     | 2.62E-04     | 0.6003   | 8.7210     | 8.97E-15 | 1.88E-13 |
| Ruminococcaceae              | family.Ruminococcaceae.id.2050              | -0.5702  | 0.0862 | 6.81E-09 | -0.6239      | 0.0964     | 1.29E-03     | -0.5965  | 8.6347     | 1.46E-14 | 2.87E-13 |
| FamilyXIIIAD3011group        | genus.FamilyXIIIAD3011group.id.11293        | -0.7506  | 0.1458 | 1.04E-04 | -0.4632      | 0.1404     | 1.79E-02     | -0.5896  | 8.4816     | 3.45E-14 | 6.39E-13 |
| Thermoanaerobacteraceae      | family.Thermoanaerobacteraceae.id.2126      | -1.0077  | 0.1266 | 7.44E-10 | -0.3421      | 0.0387     | 7.25E-04     | -0.5871  | 8.4270     | 4.69E-14 | 8.21E-13 |
| Clostridiaceae1              | family.Clostridiaceae1.id.1869              | -0.4221  | 0.0608 | 1.45E-06 | -0.8140      | 0.1510     | 6.21E-04     | -0.5861  | 8.4057     | 5.28E-14 | 8.75E-13 |
| Ruminococcus1                | genus.Ruminococcus1.id.11373                | -0.5564  | 0.0919 | 3.43E-07 | -0.6110      | 0.0951     | 1.60E-03     | -0.5831  | 8.3395     | 7.64E-14 | 1.20E-12 |
| Gelria                       | genus.Gelria.id.2134                        | -1.0022  | 0.1249 | 1.77E-10 | -0.3385      | 0.0376     | 9.71E-04     | -0.5825  | 8.3256     | 8.26E-14 | 1.24E-12 |
| Clostridiumsensustricto1     | genus.Clostridiumsensustricto1.id.1873      | -0.4102  | 0.0581 | 1.29E-06 | -0.8199      | 0.1528     | 8.71E-04     | -0.5799  | 8.2714     | 1.12E-13 | 1.48E-12 |
| Terrisporobacter             | genus.Terrisporobacter.id.11348             | -0.4810  | 0.0571 | 3.69E-11 | -0.6977      | 0.1111     | 1.77E-03     | -0.5793  | 8.2570     | 1.21E-13 | 1.52E-12 |
| RuminococcaceaeUCG010        | genus.RuminococcaceaeUCG010.id.11367        | -0.3760  | 0.0538 | 2.35E-10 | -0.8770      | 0.1197     | 4.57E-04     | -0.5742  | 8.1499     | 2.19E-13 | 2.65E-12 |
| RuminococcaceaeNK4A214group  | genus.RuminococcaceaeNK4A214group.id.11358  | -0.4209  | 0.0600 | 3.33E-10 | -0.7534      | 0.0879     | 3.86E-03     | -0.5631  | 7.9172     | 7.91E-13 | 9.03E-12 |
| Anaerotruncus                | genus.Anaerotruncus.id.2054                 | -0.5188  | 0.0738 | 8.75E-10 | -0.6109      | 0.1140     | 9.26E-04     | -0.5630  | 7.9145     | 8.03E-13 | 9.03E-12 |
| Ruminococcusgnavusgroup      | genus.Ruminococcusgnavusgroup.id.14376      | 0.5584   | 0.1033 | 7.35E-05 | 0.5620       | 0.1207     | 9.85E-04     | 0.5602   | 7.8573     | 1.10E-12 | 1.19E-11 |
| RuminococcaceaeUCG002        | genus.RuminococcaceaeUCG002.id.11360        | -0.3440  | 0.0569 | 4.55E-06 | -0.8875      | 0.1678     | 1.01E-03     | -0.5525  | 7.7024     | 2.56E-12 | 2.69E-11 |
| Flavonifractor               | genus.Flavonifractor.id.2059                | 0.5967   | 0.1001 | 1.37E-06 | 0.5025       | 0.1006     | 1.15E-03     | 0.5475   | 7.6028     | 4.39E-12 | 4.46E-11 |
| Christensenella              | genus.Christensenella.id.1867               | 0.9550   | 0.2145 | 3.53E-03 | 0.3034       | 0.0600     | 3.82E-03     | 0.5383   | 7.4213     | 1.17E-11 | 1.15E-10 |
| Fusobacteriaceae             | family.Fusobacteriaceae.id.2208             | 0.7981   | 0.1198 | 1.83E-02 | 0.3584       | 0.0949     | 2.88E-02     | 0.5348   | 7.3547     | 1.67E-11 | 1.59E-10 |
| Coprococcus2                 | genus.Coprococcus2.id.11302                 | -0.4615  | 0.0758 | 1.72E-08 | -0.6180      | 0.1260     | 2.46E-03     | -0.5340  | 7.3390     | 1.81E-11 | 1.68E-10 |
| RuminococcaceaeUCG003        | genus.RuminococcaceaeUCG003.id.11361        | -0.4026  | 0.0819 | 6.27E-05 | -0.7059      | 0.1254     | 1.23E-03     | -0.5331  | 7.3208     | 2.00E-11 | 1.80E-10 |
| Marvinbryantia               | genus.Marvinbryantia.id.2005                | -0.6872  | 0.0930 | 6.08E-09 | -0.4107      | 0.0594     | 4.33E-03     | -0.5312  | 7.2855     | 2.41E-11 | 2.11E-10 |
| RuminococcaceaeV9D2013group  | genus.RuminococcaceaeV9D2013group.id.11372  | -0.7455  | 0.1236 | 6.87E-08 | -0.3735      | 0.0667     | 3.23E-03     | -0.5277  | 7.2183     | 3.45E-11 | 2.94E-10 |
| Eggerthella                  | genus.Eggerthella.id.819                    | 0.6266   | 0.1196 | 7.72E-05 | 0.4375       | 0.1153     | 1.21E-02     | 0.5236   | 7.1401     | 5.22E-11 | 4.33E-10 |
| Subdoligranulum              | genus.Subdoligranulum.id.2070               | -1.0483  | 0.2030 | 3.66E-03 | -0.2598      | 0.0507     | 8.14E-03     | -0.5219  | 7.1089     | 6.15E-11 | 4.97E-10 |
| LachnospiraceaeNK4A136group  | genus.LachnospiraceaeNK4A136group.id.11319  | -0.6930  | 0.1353 | 4.62E-05 | -0.3926      | 0.0745     | 6.09E-04     | -0.5216  | 7.1034     | 6.33E-11 | 4.98E-10 |
| Intestinibacter              | genus.Intestinibacter.id.11345              | -0.5059  | 0.0688 | 4.48E-11 | -0.5370      | 0.1103     | 3.25E-03     | -0.5212  | 7.0967     | 6.56E-11 | 5.04E-10 |
| Caproiciproducens            | genus.Caproiciproducens.id.14382            | -0.8789  | 0.1273 | 3.29E-09 | -0.3070      | 0.0766     | 3.80E-03     | -0.5195  | 7.0634     | 7.81E-11 | 5.86E-10 |
| ClostridialesvadinBB60group  | family.ClostridialesvadinBB60group.id.11286 | -0.4517  | 0.0707 | 2.19E-08 | -0.5894      | 0.0751     | 4.09E-05     | -0.5160  | 6.9988     | 1.10E-10 | 7.70E-10 |
| Romboutsia                   | genus.Romboutsia.id.11347                   | -0.4785  | 0.0636 | 1.10E-11 | -0.5564      | 0.1005     | 1.37E-03     | -0.5160  | 6.9984     | 1.10E-10 | 7.70E-10 |
| Intestinimonas               | genus.Intestinimonas.id.2062                | -0.7245  | 0.2015 | 1.42E-02 | -0.3661      | 0.0509     | 1.28E-04     | -0.5150  | 6.9806     | 1.21E-10 | 8.29E-10 |
| Megamonas                    | genus.Megamonas.id.2184                     | 0.5076   | 0.1177 | 9.86E-03 | 0.5119       | 0.0711     | 2.24E-06     | 0.5098   | 6.8848     | 1.99E-10 | 1.33E-09 |
| Turicibacter                 | genus.Turicibacter.id.2162                  | -0.4504  | 0.0671 | 8.28E-07 | -0.5739      | 0.0871     | 2.34E-06     | -0.5084  | 6.8601     | 2.26E-10 | 1.48E-09 |

|                               |                                               |         |        |          |         |        |          |         |        |          |          |
|-------------------------------|-----------------------------------------------|---------|--------|----------|---------|--------|----------|---------|--------|----------|----------|
| Faecalitalea                  | genus.Faecalitalea.id.11392                   | 0.8681  | 0.2020 | 8.28E-04 | 0.2951  | 0.0978 | 1.28E-02 | 0.5061  | 6.8186 | 2.80E-10 | 1.80E-09 |
| Oxalobacteraceae              | family.Oxalobacteraceae.id.2966               | -0.4509 | 0.0791 | 9.89E-07 | -0.5666 | 0.1144 | 2.58E-03 | -0.5055 | 6.8067 | 2.98E-10 | 1.88E-09 |
| Peptostreptococcaceae         | family.Peptostreptococcaceae.id.2042          | -0.5191 | 0.0678 | 5.73E-10 | -0.4900 | 0.0987 | 1.47E-03 | -0.5043 | 6.7859 | 3.32E-10 | 2.05E-09 |
| Desulfovibrionaceae           | family.Desulfovibrionaceae.id.3169            | -0.8813 | 0.2752 | 1.10E-02 | -0.2849 | 0.1076 | 3.01E-02 | -0.5011 | 6.7282 | 4.47E-10 | 2.71E-09 |
| BacteroidalesS247group        | family.BacteroidalesS247group.id.11173        | -0.7184 | 0.1906 | 1.24E-02 | -0.3430 | 0.0987 | 1.29E-02 | -0.4964 | 6.6438 | 6.89E-10 | 4.02E-09 |
| Cellulosilyticum              | genus.Cellulosilyticum.id.1995                | -0.8050 | 0.1266 | 5.09E-09 | -0.3041 | 0.0496 | 2.65E-03 | -0.4948 | 6.6153 | 7.97E-10 | 4.56E-09 |
| Senegalimassilia              | genus.Senegalimassilia.id.11160               | -0.7631 | 0.1573 | 4.27E-05 | -0.3186 | 0.0571 | 1.04E-03 | -0.4930 | 6.5843 | 9.33E-10 | 5.25E-09 |
| Ruminococcustorquesgroup      | genus..Ruminococcustorquesgroup.id.14377      | 0.4605  | 0.1285 | 1.51E-02 | 0.5252  | 0.1236 | 3.89E-03 | 0.4918  | 6.5623 | 1.04E-09 | 5.61E-09 |
| Eubacteriumruminantiumgroup   | genus..Eubacteriumruminantiumgroup.id.11340   | -0.7105 | 0.1160 | 2.23E-08 | -0.3388 | 0.0695 | 2.78E-03 | -0.4906 | 6.5417 | 1.16E-09 | 6.09E-09 |
| Parvibacter                   | genus.Parvibacter.id.824                      | -0.9893 | 0.1855 | 1.44E-05 | -0.2431 | 0.0542 | 3.37E-03 | -0.4904 | 6.5388 | 1.18E-09 | 6.09E-09 |
| Lactonifactor                 | genus.Lactonifactor.id.11332                  | 0.6629  | 0.1276 | 9.71E-06 | 0.3615  | 0.0589 | 2.38E-02 | 0.4896  | 6.5233 | 1.27E-09 | 6.45E-09 |
| Eubacteriumeligensgroup       | genus..Eubacteriumeligensgroup.id.14372       | -0.3853 | 0.1053 | 4.57E-03 | -0.6143 | 0.1066 | 5.79E-04 | -0.4865 | 6.4699 | 1.67E-09 | 8.35E-09 |
| Anaerofustis                  | genus.Anaerofustis.id.1931                    | 0.6431  | 0.2136 | 9.94E-03 | 0.3646  | 0.0937 | 2.68E-03 | 0.4842  | 6.4298 | 2.04E-09 | 1.00E-08 |
| RuminococcaceaeUCG008         | genus.RuminococcaceaeUCG008.id.11365          | -0.5246 | 0.1125 | 4.19E-04 | -0.4456 | 0.1011 | 2.31E-03 | -0.4835 | 6.4177 | 2.17E-09 | 1.05E-08 |
| Fusobacterium                 | genus.Fusobacterium.id.2210                   | 0.7839  | 0.1264 | 7.13E-09 | 0.2951  | 0.1058 | 3.44E-02 | 0.4809  | 6.3735 | 2.71E-09 | 1.29E-08 |
| Olsenella                     | genus.Olsenella.id.822                        | -0.4951 | 0.0856 | 6.16E-07 | -0.4585 | 0.0864 | 1.01E-02 | -0.4764 | 6.2963 | 3.98E-09 | 1.87E-08 |
| Hydrogenoanaerobacterium      | genus.Hydrogenoanaerobacterium.id.2060        | -0.7817 | 0.1281 | 3.12E-07 | -0.2881 | 0.0431 | 2.15E-08 | -0.4746 | 6.2648 | 4.66E-09 | 2.13E-08 |
| Varibaculum                   | genus.Varibaculum.id.427                      | 0.9230  | 0.1971 | 8.57E-06 | 0.2440  | 0.0441 | 1.25E-02 | 0.4746  | 6.2646 | 4.66E-09 | 2.13E-08 |
| Eubacteriumtenuigroup         | genus..Eubacteriumtenuigroup.id.14380         | -0.8376 | 0.1998 | 9.82E-03 | -0.2665 | 0.0443 | 6.85E-06 | -0.4724 | 6.2280 | 5.59E-09 | 2.52E-08 |
| Butyricimonas                 | genus.Butyricimonas.id.945                    | -0.5059 | 0.1602 | 9.25E-03 | -0.4270 | 0.1505 | 2.08E-02 | -0.4648 | 6.0990 | 1.06E-08 | 4.70E-08 |
| Clostridiuminnocuumgroup      | genus..Clostridiuminnocuumgroup.id.14397      | 0.9395  | 0.2094 | 2.40E-04 | 0.2296  | 0.0498 | 2.19E-03 | 0.4645  | 6.0940 | 1.08E-08 | 4.73E-08 |
| Eubacteriumoxidoreducensgroup | genus..Eubacteriumoxidoreducensgroup.id.11339 | -0.5390 | 0.1109 | 1.85E-05 | -0.3996 | 0.0868 | 3.40E-03 | -0.4641 | 6.0873 | 1.12E-08 | 4.77E-08 |
| Howardella                    | genus.Howardella.id.2000                      | -0.6704 | 0.1134 | 2.65E-06 | -0.3212 | 0.1171 | 2.93E-02 | -0.4640 | 6.0865 | 1.12E-08 | 4.77E-08 |
| Holdemanella                  | genus.Holdemanella.id.11393                   | -1.0346 | 0.2095 | 2.71E-03 | -0.2033 | 0.0992 | 8.07E-02 | -0.4586 | 5.9969 | 1.74E-08 | 7.02E-08 |
| Epulopiscium                  | genus.Epulopiscium.id.1998                    | -0.5141 | 0.1065 | 8.61E-04 | -0.4088 | 0.0789 | 9.01E-05 | -0.4585 | 5.9939 | 1.76E-08 | 7.02E-08 |
| Parvimonas                    | genus.Parvimonas.id.1945                      | -1.2489 | 0.3847 | 2.26E-02 | -0.1669 | 0.0471 | 7.18E-03 | -0.4566 | 5.9628 | 2.05E-08 | 7.97E-08 |
| Oxalobacter                   | genus.Oxalobacter.id.2978                     | -0.3918 | 0.1525 | 4.28E-02 | -0.5313 | 0.1145 | 2.26E-03 | -0.4562 | 5.9571 | 2.11E-08 | 8.11E-08 |
| Defluviitaleaceae             | family.Defluviitaleaceae.id.1924              | -0.6766 | 0.1356 | 1.59E-04 | -0.3050 | 0.0706 | 1.40E-02 | -0.4543 | 5.9245 | 2.47E-08 | 9.37E-08 |
| Atopobium                     | genus.Atopobium.id.814                        | 0.7131  | 0.2930 | 8.94E-02 | 0.2874  | 0.0662 | 6.63E-02 | 0.4527  | 5.8989 | 2.79E-08 | 1.05E-07 |
| Scardovia                     | genus.Scardovia.id.440                        | 0.8060  | 0.1386 | 6.98E-08 | 0.2533  | 0.0436 | 6.66E-07 | 0.4518  | 5.8844 | 2.99E-08 | 1.11E-07 |
| Ruminiclostridium             | genus.Ruminiclostridium.id.11353              | -0.9096 | 0.1502 | 2.29E-07 | -0.2220 | 0.0340 | 5.70E-06 | -0.4494 | 5.8447 | 3.62E-08 | 1.33E-07 |
| PrevotellaceaeNK3B31group     | genus.PrevotellaceaeNK3B31group.id.11185      | -0.7109 | 0.1698 | 2.85E-03 | -0.2788 | 0.0541 | 9.47E-07 | -0.4452 | 5.7767 | 5.01E-08 | 1.81E-07 |
| RuminococcaceaeUCG004         | genus.RuminococcaceaeUCG004.id.11362          | 0.6075  | 0.1980 | 1.74E-02 | 0.3144  | 0.0791 | 8.62E-03 | 0.4370  | 5.6456 | 9.32E-08 | 3.34E-07 |
| RikenellaceaeRC9gutgroup      | genus.RikenellaceaeRC9gutgroup.id.11191       | -0.5565 | 0.1311 | 2.30E-02 | -0.3417 | 0.0808 | 1.02E-02 | -0.4361 | 5.6300 | 1.00E-07 | 3.54E-07 |
| DefluviitaleaceaeUCG011       | genus.DefluviitaleaceaeUCG011.id.11287        | -0.6732 | 0.1449 | 4.57E-04 | -0.2814 | 0.0667 | 4.00E-02 | -0.4352 | 5.6165 | 1.07E-07 | 3.75E-07 |
| Anaeroplasmataceae            | family.Anaeroplasmataceae.id.3925             | -0.8210 | 0.2038 | 2.08E-03 | -0.2294 | 0.0544 | 8.77E-03 | -0.4340 | 5.5972 | 1.17E-07 | 4.01E-07 |
| Anaeroplasma                  | genus.Anaeroplasma.id.3926                    | -0.8210 | 0.2038 | 2.08E-03 | -0.2294 | 0.0544 | 8.77E-03 | -0.4340 | 5.5972 | 1.17E-07 | 4.01E-07 |
| Clostridiumsensustricto13     | genus.Clostridiumsensustricto13.id.1877       | -0.8381 | 0.2883 | 2.01E-02 | -0.2232 | 0.0617 | 9.60E-03 | -0.4325 | 5.5730 | 1.31E-07 | 4.44E-07 |
| Rikenellaceae                 | family.Rikenellaceae.id.967                   | -0.4650 | 0.0821 | 1.00E-07 | -0.4012 | 0.0899 | 5.10E-03 | -0.4320 | 5.5650 | 1.36E-07 | 4.56E-07 |
| Alistipes                     | genus.Alistipes.id.968                        | -0.5992 | 0.1089 | 2.11E-07 | -0.3100 | 0.0652 | 6.32E-03 | -0.4310 | 5.5493 | 1.46E-07 | 4.84E-07 |
| ErysipelotrichaceaeUCG006     | genus.ErysipelotrichaceaeUCG006.id.11386      | -0.7927 | 0.2097 | 7.30E-03 | -0.2330 | 0.0430 | 6.10E-03 | -0.4298 | 5.5302 | 1.60E-07 | 5.25E-07 |
| Lachnospiraceae               | family.Lachnospiraceae.id.1987                | 0.3260  | 0.0796 | 1.60E-02 | 0.5598  | 0.1465 | 7.57E-03 | 0.4272  | 5.4895 | 1.93E-07 | 6.27E-07 |
| Dielma                        | genus.Dielma.id.11380                         | 1.0898  | 0.3206 | 8.94E-03 | 0.1627  | 0.0306 | 1.48E-05 | 0.4211  | 5.3940 | 3.00E-07 | 9.64E-07 |
| LachnospiraceaeFCS020group    | genus.LachnospiraceaeFCS020group.id.11314     | -0.4152 | 0.0998 | 5.84E-04 | -0.4232 | 0.1266 | 1.41E-02 | -0.4192 | 5.3646 | 3.43E-07 | 1.09E-06 |
| Blautia                       | genus.Blautia.id.1992                         | 0.2997  | 0.0942 | 3.36E-02 | 0.5831  | 0.1639 | 9.62E-03 | 0.4180  | 5.3464 | 3.72E-07 | 1.17E-06 |
| Prevotella                    | genus.Prevotella.id.963                       | -0.7899 | 0.4041 | 8.17E-02 | -0.2202 | 0.0839 | 3.17E-02 | -0.4170 | 5.3314 | 3.99E-07 | 1.24E-06 |

|                                   |                                                  |         |        |          |         |        |          |         |        |          |          |
|-----------------------------------|--------------------------------------------------|---------|--------|----------|---------|--------|----------|---------|--------|----------|----------|
| Paeniclostridium                  | genus.Paeniclostridium.id.14378                  | -0.7940 | 0.2774 | 2.69E-02 | -0.2154 | 0.0823 | 3.55E-02 | -0.4136 | 5.2777 | 5.09E-07 | 1.57E-06 |
| Comamonadaceae                    | family.Comamonadaceae.id.2913                    | 0.8121  | 0.3124 | 3.45E-02 | 0.2086  | 0.1530 | 2.34E-01 | 0.4116  | 5.2478 | 5.82E-07 | 1.78E-06 |
| RuminococcaceaeUCG011             | genus.RuminococcaceaeUCG011.id.11368             | -0.4410 | 0.1473 | 1.37E-02 | -0.3837 | 0.1309 | 1.79E-02 | -0.4113 | 5.2436 | 5.93E-07 | 1.80E-06 |
| Eubacteriumrectalegroup           | genus.Eubacteriumrectalegroup.id.14374           | 0.4645  | 0.1096 | 1.82E-03 | 0.3615  | 0.0840 | 5.06E-03 | 0.4098  | 5.2194 | 6.61E-07 | 1.98E-06 |
| Peptococcaceae                    | family.Peptococcaceae.id.2024                    | -0.4069 | 0.1006 | 1.58E-03 | -0.4076 | 0.1002 | 9.35E-03 | -0.4072 | 5.1806 | 7.87E-07 | 2.34E-06 |
| Phascolarctobacterium             | genus.Phascolarctobacterium.id.2168              | -0.6332 | 0.1957 | 4.60E-03 | -0.2584 | 0.0975 | 3.19E-02 | -0.4045 | 5.1385 | 9.49E-07 | 2.79E-06 |
| Klebsiella                        | genus.Klebsiella.id.3507                         | 0.4792  | 0.1001 | 6.87E-02 | 0.3394  | 0.1027 | 1.41E-02 | 0.4033  | 5.1206 | 1.03E-06 | 2.98E-06 |
| Kocuria                           | genus.Kocuria.id.642                             | -0.7159 | 0.2493 | 2.95E-02 | -0.2271 | 0.0507 | 5.52E-02 | -0.4032 | 5.1193 | 1.03E-06 | 2.98E-06 |
| LachnospiraceaeUCG003             | genus.LachnospiraceaeUCG003.id.11323             | -0.4152 | 0.0838 | 4.07E-06 | -0.3908 | 0.0694 | 2.29E-06 | -0.4028 | 5.1128 | 1.06E-06 | 3.04E-06 |
| Sellimonas                        | genus.Sellimonas.id.14369                        | 0.5607  | 0.1874 | 7.49E-03 | 0.2891  | 0.0709 | 3.09E-03 | 0.4026  | 5.1104 | 1.08E-06 | 3.06E-06 |
| Fastidiosipila                    | genus.Fastidiosipila.id.2058                     | -0.8944 | 0.2416 | 2.01E-02 | -0.1801 | 0.0471 | 9.77E-02 | -0.4014 | 5.0920 | 1.17E-06 | 3.29E-06 |
| FamilyXIIIUCG001                  | genus.FamilyXIIIUCG001.id.11294                  | -0.5708 | 0.1283 | 2.76E-04 | -0.2819 | 0.1160 | 5.02E-02 | -0.4011 | 5.0882 | 1.19E-06 | 3.32E-06 |
| Neisseriaceae                     | family.Neisseriaceae.id.3010                     | -0.5528 | 0.1398 | 9.90E-04 | -0.2868 | 0.0668 | 3.70E-03 | -0.3982 | 5.0438 | 1.44E-06 | 3.94E-06 |
| Tyzzereella3                      | genus.Tyzzereella3.id.11335                      | 0.4832  | 0.1162 | 4.93E-03 | 0.3276  | 0.0885 | 1.71E-02 | 0.3979  | 5.0389 | 1.47E-06 | 3.99E-06 |
| Desulfovibrio                     | genus.Desulfovibrio.id.3173                      | -0.7418 | 0.2116 | 4.74E-02 | -0.2131 | 0.0825 | 7.56E-02 | -0.3976 | 5.0346 | 1.50E-06 | 4.04E-06 |
| PrevotellaceaeUCG004              | genus.PrevotellaceaeUCG004.id.11188              | -0.7507 | 0.2696 | 2.08E-02 | -0.2069 | 0.0824 | 4.30E-02 | -0.3941 | 4.9825 | 1.89E-06 | 5.00E-06 |
| Eubacteriumhalliigroup            | genus.Eubacteriumhalliigroup.id.11338            | 0.4290  | 0.1199 | 2.32E-03 | 0.3604  | 0.1465 | 3.94E-02 | 0.3932  | 4.9693 | 2.00E-06 | 5.25E-06 |
| Anaerostipes                      | genus.Anaerostipes.id.1991                       | 0.4057  | 0.0794 | 8.08E-03 | 0.3805  | 0.1224 | 1.95E-02 | 0.3929  | 4.9638 | 2.05E-06 | 5.34E-06 |
| LachnospiraceaeND3007group        | genus.LachnospiraceaeND3007group.id.11317        | -0.9660 | 0.2897 | 1.07E-02 | -0.1593 | 0.0574 | 8.57E-02 | -0.3923 | 4.9558 | 2.12E-06 | 5.47E-06 |
| Ruminococcus2                     | genus.Ruminococcus2.id.11374                     | -0.6314 | 0.2193 | 2.69E-02 | -0.2408 | 0.0827 | 3.14E-02 | -0.3899 | 4.9199 | 2.48E-06 | 6.35E-06 |
| Ruminiclostridium1                | genus.Ruminiclostridium1.id.11354                | -0.7564 | 0.1646 | 9.77E-05 | -0.1996 | 0.0496 | 3.09E-03 | -0.3885 | 4.8993 | 2.71E-06 | 6.88E-06 |
| Butyrivibrio                      | genus.Butyrivibrio.id.1993                       | -0.3954 | 0.0848 | 2.44E-02 | -0.3805 | 0.0815 | 9.52E-04 | -0.3879 | 4.8898 | 2.82E-06 | 7.04E-06 |
| Eubacteriumcoprostanoligenesgroup | genus.Eubacteriumcoprostanoligenesgroup.id.11375 | -0.4049 | 0.1545 | 2.11E-02 | -0.3715 | 0.1151 | 1.43E-02 | -0.3878 | 4.8891 | 2.83E-06 | 7.04E-06 |
| Pseudobutyrvibrio                 | genus.Pseudobutyrvibrio.id.2010                  | -0.6167 | 0.2287 | 2.04E-02 | -0.2439 | 0.0842 | 1.91E-02 | -0.3878 | 4.8881 | 2.84E-06 | 7.04E-06 |
| Oscillibacter                     | genus.Oscillibacter.id.2063                      | -0.4516 | 0.2394 | 1.34E-01 | -0.3288 | 0.0973 | 7.78E-03 | -0.3854 | 4.8525 | 3.31E-06 | 8.15E-06 |
| FamilyXIII                        | family.FamilyXIII.id.1957                        | -0.4188 | 0.1704 | 4.71E-02 | -0.3541 | 0.1325 | 2.49E-02 | -0.3851 | 4.8482 | 3.38E-06 | 8.25E-06 |
| Rhodospirillaceae                 | family.Rhodospirillaceae.id.2717                 | -0.7901 | 0.1650 | 4.74E-06 | -0.1827 | 0.0461 | 1.22E-02 | -0.3799 | 4.7722 | 4.67E-06 | 1.13E-05 |
| Neisseria                         | genus.Neisseria.id.3032                          | -0.4892 | 0.1327 | 2.19E-03 | -0.2949 | 0.0680 | 3.81E-03 | -0.3798 | 4.7706 | 4.70E-06 | 1.13E-05 |
| Acidaminococcaceae                | family.Acidaminococcaceae.id.2166                | -0.9547 | 0.2596 | 2.36E-03 | -0.1487 | 0.0629 | 5.08E-02 | -0.3769 | 4.7271 | 5.65E-06 | 1.34E-05 |
| Eubacteriaceae                    | family.Eubacteriaceae.id.1928                    | 0.6405  | 0.2036 | 1.01E-02 | 0.2217  | 0.0574 | 2.13E-03 | 0.3768  | 4.7266 | 5.67E-06 | 1.34E-05 |
| Tyzzereella                       | genus.Tyzzereella.id.11334                       | 0.4889  | 0.2351 | 9.97E-02 | 0.2891  | 0.0937 | 2.04E-02 | 0.3760  | 4.7147 | 5.96E-06 | 1.40E-05 |
| Anaerofilum                       | genus.Anaerofilum.id.2053                        | -0.4521 | 0.2567 | 1.11E-01 | -0.3106 | 0.1050 | 1.81E-02 | -0.3747 | 4.6961 | 6.44E-06 | 1.50E-05 |
| Anaeroglobus                      | genus.Anaeroglobus.id.2176                       | 0.5878  | 0.1299 | 2.20E-05 | 0.2348  | 0.0624 | 1.21E-02 | 0.3715  | 4.6498 | 7.82E-06 | 1.81E-05 |
| Odoribacter                       | genus.Odoribacter.id.952                         | -0.4615 | 0.1387 | 1.54E-02 | -0.2971 | 0.1206 | 4.18E-02 | -0.3703 | 4.6313 | 8.45E-06 | 1.94E-05 |
| Methanosphaera                    | genus.Methanosphaera.id.124                      | -0.4415 | 0.1514 | 3.95E-02 | -0.3067 | 0.0916 | 7.76E-03 | -0.3680 | 4.5982 | 9.69E-06 | 2.21E-05 |
| Gallicola                         | genus.Gallicola.id.1941                          | 0.7756  | 0.2255 | 1.25E-03 | 0.1744  | 0.0377 | 1.03E-03 | 0.3678  | 4.5959 | 9.79E-06 | 2.22E-05 |
| Parascardovia                     | genus.Parascardovia.id.439                       | 0.5738  | 0.1901 | 9.14E-03 | 0.2355  | 0.0774 | 2.16E-02 | 0.3676  | 4.5931 | 9.90E-06 | 2.23E-05 |
| PrevotellaceaeUCG001              | genus.PrevotellaceaeUCG001.id.11186              | -0.7057 | 0.3426 | 9.18E-02 | -0.1894 | 0.0421 | 9.06E-02 | -0.3656 | 4.5638 | 1.12E-05 | 2.50E-05 |
| Enterorhabdus                     | genus.Enterorhabdus.id.820                       | -0.6041 | 0.1217 | 1.11E-02 | -0.2200 | 0.0849 | 5.20E-02 | -0.3645 | 4.5487 | 1.19E-05 | 2.64E-05 |
| Porphyromonadaceae                | family.Porphyromonadaceae.id.943                 | -0.4982 | 0.1305 | 1.69E-03 | -0.2662 | 0.1327 | 8.09E-02 | -0.3642 | 4.5434 | 1.22E-05 | 2.69E-05 |
| Haemophilus                       | genus.Haemophilus.id.3698                        | -0.4875 | 0.1789 | 1.59E-02 | -0.2690 | 0.1262 | 7.26E-02 | -0.3621 | 4.5133 | 1.38E-05 | 3.02E-05 |
| ErysipelotrichaceaeUCG004         | genus.ErysipelotrichaceaeUCG004.id.11385         | -0.6295 | 0.1812 | 3.69E-02 | -0.2056 | 0.0478 | 8.90E-05 | -0.3598 | 4.4804 | 1.57E-05 | 3.41E-05 |
| Gordonibacter                     | genus.Gordonibacter.id.821                       | 0.5679  | 0.2573 | 6.27E-02 | 0.2276  | 0.0731 | 4.87E-02 | 0.3595  | 4.4762 | 1.60E-05 | 3.45E-05 |
| Barnesiella                       | genus.Barnesiella.id.944                         | -0.6140 | 0.1443 | 9.24E-05 | -0.2073 | 0.0613 | 1.97E-02 | -0.3568 | 4.4376 | 1.87E-05 | 4.01E-05 |
| Finegoldia                        | genus.Finegoldia.id.1940                         | 0.5180  | 0.1448 | 2.39E-02 | 0.2452  | 0.0550 | 2.53E-02 | 0.3564  | 4.4318 | 1.92E-05 | 4.09E-05 |
| Prevotellaceae                    | family.Prevotellaceae.id.960                     | -0.5554 | 0.1247 | 5.01E-05 | -0.2248 | 0.0528 | 2.58E-04 | -0.3534 | 4.3891 | 2.28E-05 | 4.82E-05 |

|                               |                                               |         |        |          |         |        |          |         |        |          |          |
|-------------------------------|-----------------------------------------------|---------|--------|----------|---------|--------|----------|---------|--------|----------|----------|
| CoriobacteriaceaeUCG003       | genus.CoriobacteriaceaeUCG003.id.11159        | -0.6086 | 0.2574 | 6.04E-02 | -0.2048 | 0.0528 | 9.58E-02 | -0.3531 | 4.3848 | 2.32E-05 | 4.84E-05 |
| Paenibacillaceae              | family.Paenibacillaceae.id.1740               | 0.4538  | 0.4427 | 3.25E-01 | 0.2747  | 0.1261 | 1.72E-01 | 0.3531  | 4.3846 | 2.32E-05 | 4.84E-05 |
| Bacteroidespectinophilusgroup | genus..Bacteroidespectinophilusgroup.id.14371 | -0.5416 | 0.1353 | 2.31E-02 | -0.2253 | 0.0674 | 1.21E-02 | -0.3493 | 4.3320 | 2.86E-05 | 5.93E-05 |
| Slackia                       | genus.Slackia.id.825                          | -0.6855 | 0.1684 | 8.18E-05 | -0.1764 | 0.0456 | 6.15E-03 | -0.3477 | 4.3089 | 3.14E-05 | 6.46E-05 |
| Holdemania                    | genus.Holdemania.id.2157                      | 0.8109  | 0.1212 | 1.19E-08 | 0.1458  | 0.0801 | 1.10E-01 | 0.3438  | 4.2538 | 3.90E-05 | 7.93E-05 |
| CandidatusStoquefichus        | genus.CandidatusStoquefichus.id.11379         | 0.4679  | 0.1522 | 1.45E-02 | 0.2526  | 0.0912 | 2.90E-02 | 0.3438  | 4.2537 | 3.90E-05 | 7.93E-05 |
| Pasteurellaceae               | family.Pasteurellaceae.id.3689                | -0.4307 | 0.1731 | 2.50E-02 | -0.2584 | 0.1229 | 7.08E-02 | -0.3336 | 4.1120 | 6.78E-05 | 1.35E-04 |
| Solobacterium                 | genus.Solobacterium.id.2161                   | -0.5718 | 0.1969 | 7.53E-03 | -0.1910 | 0.0648 | 9.25E-02 | -0.3305 | 4.0688 | 8.00E-05 | 1.58E-04 |
| Peptococcus                   | genus.Peptococcus.id.2037                     | -0.4439 | 0.1533 | 2.09E-02 | -0.2443 | 0.1014 | 5.47E-02 | -0.3293 | 4.0521 | 8.52E-05 | 1.68E-04 |
| Oscillospira                  | genus.Oscillospira.id.2064                    | -0.7630 | 0.1876 | 2.54E-04 | -0.1420 | 0.0612 | 6.48E-02 | -0.3292 | 4.0504 | 8.58E-05 | 1.68E-04 |
| Methanobacteriaceae           | family.Methanobacteriaceae.id.121             | -0.3098 | 0.0834 | 1.22E-02 | -0.3370 | 0.1283 | 4.11E-02 | -0.3231 | 3.9670 | 1.18E-04 | 2.26E-04 |
| Sarcina                       | genus.Sarcina.id.1896                         | 1.0866  | 0.2265 | 6.99E-05 | 0.0952  | 0.0609 | 2.11E-01 | 0.3216  | 3.9462 | 1.27E-04 | 2.41E-04 |
| Elusimicrobiaceae             | family.Elusimicrobiaceae.id.1635              | 0.6329  | 0.1938 | 5.61E-03 | 0.1633  | 0.0444 | 3.39E-04 | 0.3215  | 3.9453 | 1.28E-04 | 2.41E-04 |
| Elusimicrobium                | genus.Elusimicrobium.id.1636                  | 0.6329  | 0.1938 | 5.61E-03 | 0.1633  | 0.0444 | 3.39E-04 | 0.3215  | 3.9453 | 1.28E-04 | 2.41E-04 |
| HafniaObesumbacterium         | genus.HafniaObesumbacterium.id.14636          | -0.7346 | 0.2527 | 2.27E-02 | -0.1398 | 0.0669 | 7.02E-02 | -0.3205 | 3.9312 | 1.34E-04 | 2.52E-04 |
| Brochothrix                   | genus.Brochothrix.id.1738                     | 0.5760  | 0.1961 | 1.08E-02 | 0.1778  | 0.0878 | 7.37E-02 | 0.3200  | 3.9247 | 1.38E-04 | 2.57E-04 |
| Dorea                         | genus.Dorea.id.1997                           | 0.4552  | 0.1557 | 2.23E-02 | 0.2239  | 0.1026 | 7.30E-02 | 0.3193  | 3.9145 | 1.43E-04 | 2.65E-04 |
| Lachnospira                   | genus.Lachnospira.id.2004                     | -0.3843 | 0.2366 | 1.45E-01 | -0.2581 | 0.0738 | 8.65E-03 | -0.3149 | 3.8551 | 1.78E-04 | 3.28E-04 |
| Oribacterium                  | genus.Oribacterium.id.2008                    | -0.5673 | 0.1898 | 4.90E-03 | -0.1742 | 0.0508 | 1.09E-02 | -0.3144 | 3.8476 | 1.83E-04 | 3.36E-04 |
| Leuconostoc                   | genus.Leuconostoc.id.1841                     | 0.4066  | 0.2008 | 7.46E-02 | 0.2422  | 0.0874 | 3.00E-02 | 0.3138  | 3.8406 | 1.88E-04 | 3.42E-04 |
| Methanobrevibacter            | genus.Methanobrevibacter.id.123               | -0.3194 | 0.0978 | 3.03E-02 | -0.3059 | 0.1073 | 4.24E-02 | -0.3126 | 3.8235 | 2.00E-04 | 3.62E-04 |
| LachnospiraceaeUCG008         | genus.LachnospiraceaeUCG008.id.11328          | 0.4495  | 0.1463 | 2.52E-02 | 0.2146  | 0.0628 | 7.50E-03 | 0.3106  | 3.7963 | 2.21E-04 | 3.98E-04 |
| Victivallis                   | genus.Victivallis.id.2256                     | -0.7463 | 0.2942 | 3.30E-02 | -0.1288 | 0.0551 | 5.54E-02 | -0.3100 | 3.7885 | 2.27E-04 | 4.07E-04 |
| Acetanaerobacterium           | genus.Acetanaerobacterium.id.2051             | 0.6797  | 0.2841 | 4.99E-02 | 0.1409  | 0.0418 | 4.38E-02 | 0.3094  | 3.7807 | 2.34E-04 | 4.14E-04 |
| LachnospiraceaeUCG004         | genus.LachnospiraceaeUCG004.id.11324          | -0.3697 | 0.1269 | 1.58E-02 | -0.2588 | 0.1386 | 9.33E-02 | -0.3093 | 3.7792 | 2.35E-04 | 4.14E-04 |
| Prevotella9                   | genus.Prevotella9.id.11183                    | -0.7102 | 0.2185 | 1.67E-02 | -0.1345 | 0.1116 | 3.78E-01 | -0.3091 | 3.7765 | 2.38E-04 | 4.16E-04 |
| LachnospiraceaeNK4B4group     | genus.LachnospiraceaeNK4B4group.id.11320      | -0.7038 | 0.1961 | 8.32E-03 | -0.1290 | 0.0546 | 4.01E-02 | -0.3013 | 3.6712 | 3.47E-04 | 6.03E-04 |
| FamilyXI                      | family.FamilyXI.id.1732                       | 0.4786  | 0.2491 | 9.29E-02 | 0.1802  | 0.0810 | 7.36E-02 | 0.2937  | 3.5696 | 4.96E-04 | 8.53E-04 |
| Gemella                       | genus.Gemella.id.1733                         | 0.4786  | 0.2491 | 9.29E-02 | 0.1802  | 0.0810 | 7.36E-02 | 0.2937  | 3.5696 | 4.96E-04 | 8.53E-04 |
| Isobaculum                    | genus.Isobaculum.id.1822                      | -0.6885 | 0.2736 | 2.17E-02 | -0.1235 | 0.0505 | 3.58E-02 | -0.2917 | 3.5427 | 5.44E-04 | 9.30E-04 |
| Paraprevotella                | genus.Paraprevotella.id.962                   | -0.7006 | 0.1671 | 2.08E-04 | -0.1214 | 0.0592 | 2.91E-01 | -0.2916 | 3.5417 | 5.46E-04 | 9.30E-04 |
| Parasutterella                | genus.Parasutterella.id.2892                  | 0.4314  | 0.1333 | 4.07E-03 | 0.1855  | 0.0588 | 2.85E-03 | 0.2829  | 3.4266 | 8.10E-04 | 1.37E-03 |
| Rikenella                     | genus.Rikenella.id.973                        | -0.4635 | 0.2408 | 9.16E-02 | -0.1723 | 0.0842 | 9.79E-02 | -0.2826 | 3.4235 | 8.19E-04 | 1.38E-03 |
| CoriobacteriaceaeUCG002       | genus.CoriobacteriaceaeUCG002.id.11158        | -0.4527 | 0.1369 | 1.35E-03 | -0.1761 | 0.0702 | 4.12E-02 | -0.2823 | 3.4193 | 8.31E-04 | 1.39E-03 |
| Megasphaera                   | genus.Megasphaera.id.2185                     | 0.4752  | 0.1896 | 1.53E-02 | 0.1607  | 0.0729 | 1.43E-01 | 0.2764  | 3.3414 | 1.08E-03 | 1.78E-03 |
| Metascardovia                 | genus.Metascardovia.id.438                    | 0.3610  | 0.2583 | 1.94E-01 | 0.2082  | 0.1149 | 1.98E-01 | 0.2742  | 3.3124 | 1.19E-03 | 1.95E-03 |
| Leuconostocaceae              | family.Leuconostocaceae.id.1839               | 0.3795  | 0.1988 | 9.88E-02 | 0.1961  | 0.0963 | 7.60E-02 | 0.2728  | 3.2950 | 1.26E-03 | 2.05E-03 |
| Micrococcaceae                | family.Micrococcaceae.id.636                  | 0.3723  | 0.2335 | 1.77E-01 | 0.1971  | 0.1106 | 1.13E-01 | 0.2709  | 3.2695 | 1.37E-03 | 2.22E-03 |
| Leptotrichiaceae              | family.Leptotrichiaceae.id.2215               | -0.6784 | 0.2834 | 2.94E-02 | -0.1063 | 0.0646 | 1.36E-01 | -0.2686 | 3.2398 | 1.51E-03 | 2.43E-03 |
| Papillibacter                 | genus.Papillibacter.id.2065                   | -0.5476 | 0.1657 | 2.74E-03 | -0.1288 | 0.0778 | 1.33E-01 | -0.2656 | 3.2012 | 1.71E-03 | 2.74E-03 |
| Fusicatenibacter              | genus.Fusicatenibacter.id.11305               | 0.4391  | 0.2241 | 9.31E-02 | 0.1600  | 0.0968 | 1.49E-01 | 0.2650  | 3.1934 | 1.75E-03 | 2.80E-03 |
| Succinatimonas                | genus.Succinatimonas.id.3329                  | 0.5761  | 0.1923 | 2.63E-02 | 0.1203  | 0.0814 | 1.98E-01 | 0.2633  | 3.1706 | 1.88E-03 | 3.00E-03 |
| Ruminiclostridium9            | genus.Ruminiclostridium9.id.11357             | -0.5763 | 0.1638 | 5.96E-04 | -0.1198 | 0.0473 | 2.87E-02 | -0.2627 | 3.1639 | 1.92E-03 | 3.04E-03 |
| Rothia                        | genus.Rothia.id.646                           | 0.3555  | 0.2211 | 1.80E-01 | 0.1929  | 0.1099 | 1.19E-01 | 0.2619  | 3.1527 | 1.99E-03 | 3.14E-03 |
| Anaerospobacter               | genus.Anaerospobacter.id.1990                 | 0.3726  | 0.2235 | 1.88E-01 | 0.1839  | 0.0666 | 2.53E-02 | 0.2618  | 3.1514 | 2.00E-03 | 3.14E-03 |
| Cardiobacteriaceae            | family.Cardiobacteriaceae.id.3410             | -0.3265 | 0.2514 | 2.37E-01 | -0.2084 | 0.0954 | 7.32E-02 | -0.2609 | 3.1399 | 2.08E-03 | 3.22E-03 |

|                              |                                             |         |        |          |         |        |          |         |        |          |          |
|------------------------------|---------------------------------------------|---------|--------|----------|---------|--------|----------|---------|--------|----------|----------|
| Cardiobacterium              | genus.Cardiobacterium.id.3411               | -0.3265 | 0.2514 | 2.37E-01 | -0.2084 | 0.0954 | 7.32E-02 | -0.2609 | 3.1399 | 2.08E-03 | 3.22E-03 |
| Butyricococcus               | genus.Butyricococcus.id.2055                | 0.4607  | 0.1889 | 8.41E-02 | 0.1422  | 0.0877 | 1.62E-01 | 0.2559  | 3.0759 | 2.54E-03 | 3.92E-03 |
| Pseudoflavonifractor         | genus.Pseudoflavonifractor.id.2066          | 0.7911  | 0.3298 | 4.69E-02 | 0.0815  | 0.0403 | 1.13E-01 | 0.2540  | 3.0512 | 2.74E-03 | 4.22E-03 |
| Cloacibacillus               | genus.Cloacibacillus.id.3908                | -0.5286 | 0.1690 | 2.43E-03 | -0.1189 | 0.0388 | 5.59E-03 | -0.2507 | 3.0088 | 3.13E-03 | 4.76E-03 |
| Abiotrophia                  | genus.Abiotrophia.id.1803                   | 1.2637  | 0.3335 | 1.07E-02 | 0.0497  | 0.0566 | 4.05E-01 | 0.2506  | 3.0079 | 3.14E-03 | 4.76E-03 |
| Eubacteriumbrachygroup       | genus.Eubacteriumbrachygroup.id.11296       | 0.3318  | 0.1856 | 1.17E-01 | 0.1892  | 0.1330 | 1.90E-01 | 0.2506  | 3.0074 | 3.14E-03 | 4.76E-03 |
| Brevibacteriaceae            | family.Brevibacteriaceae.id.521             | -0.6533 | 0.3393 | 8.91E-02 | -0.0938 | 0.0681 | 2.22E-01 | -0.2476 | 2.9690 | 3.54E-03 | 5.30E-03 |
| Brevibacterium               | genus.Brevibacterium.id.522                 | -0.6533 | 0.3393 | 8.91E-02 | -0.0938 | 0.0681 | 2.22E-01 | -0.2476 | 2.9690 | 3.54E-03 | 5.30E-03 |
| Asaccharobacter              | genus.Asaccharobacter.id.813                | 0.4935  | 0.2309 | 6.47E-02 | 0.1222  | 0.0554 | 6.85E-02 | 0.2456  | 2.9439 | 3.82E-03 | 5.68E-03 |
| Denitrobacterium             | genus.Denitrobacterium.id.818               | -0.4745 | 0.3228 | 1.81E-01 | -0.1271 | 0.1007 | 2.76E-01 | -0.2456 | 2.9435 | 3.82E-03 | 5.68E-03 |
| Peptoniphilus                | genus.Peptoniphilus.id.1946                 | 0.6300  | 0.2476 | 5.43E-02 | 0.0934  | 0.0316 | 9.32E-02 | 0.2426  | 2.9052 | 4.29E-03 | 6.34E-03 |
| Catabacter                   | genus.Catabacter.id.11282                   | -0.5443 | 0.4220 | 2.29E-01 | -0.1069 | 0.0594 | 1.32E-01 | -0.2413 | 2.8885 | 4.51E-03 | 6.64E-03 |
| possiblegenusSk018           | genus.possiblegenusSk018.id.2019            | -0.4554 | 0.2611 | 1.29E-01 | -0.1238 | 0.1015 | 2.71E-01 | -0.2375 | 2.8406 | 5.20E-03 | 7.62E-03 |
| Alcaligenaceae               | family.Alcaligenaceae.id.2875               | 0.3576  | 0.1563 | 2.71E-02 | 0.1529  | 0.0517 | 7.38E-03 | 0.2338  | 2.7944 | 5.96E-03 | 8.69E-03 |
| Synergistes                  | genus.Synergistes.id.3913                   | 0.4240  | 0.4252 | 3.48E-01 | 0.1287  | 0.0477 | 2.48E-02 | 0.2336  | 2.7920 | 6.00E-03 | 8.71E-03 |
| Eubacteriumventriosumgroup   | genus.Eubacteriumventriosumgroup.id.11341   | 0.5004  | 0.3174 | 1.57E-01 | 0.1085  | 0.0673 | 1.55E-01 | 0.2330  | 2.7843 | 6.14E-03 | 8.87E-03 |
| RuminococcaceaeUCG013        | genus.RuminococcaceaeUCG013.id.11370        | 0.5322  | 0.2699 | 1.05E-01 | 0.0975  | 0.0577 | 1.56E-01 | 0.2278  | 2.7187 | 7.42E-03 | 1.07E-02 |
| Murimonas                    | genus.Murimonas.id.14368                    | 0.2461  | 0.2150 | 2.80E-01 | 0.2060  | 0.1051 | 9.04E-02 | 0.2252  | 2.6856 | 8.15E-03 | 1.17E-02 |
| Eubacteriumfissicatenaagroup | genus.Eubacteriumfissicatenaagroup.id.14373 | 0.6660  | 0.3380 | 6.69E-02 | 0.0737  | 0.0542 | 2.24E-01 | 0.2215  | 2.6391 | 9.29E-03 | 1.32E-02 |
| Biostraticola                | genus.Biostraticola.id.3471                 | -0.6617 | 0.4286 | 1.53E-01 | -0.0729 | 0.0501 | 1.88E-01 | -0.2196 | 2.6153 | 9.93E-03 | 1.41E-02 |
| Pediococcus                  | genus.Pediococcus.id.1838                   | 0.3662  | 0.1925 | 6.85E-02 | 0.1291  | 0.0648 | 8.95E-02 | 0.2175  | 2.5887 | 1.07E-02 | 1.51E-02 |
| Parabacteroides              | genus.Parabacteroides.id.954                | -0.3704 | 0.1574 | 4.01E-02 | -0.1251 | 0.1806 | 5.16E-01 | -0.2152 | 2.5606 | 1.15E-02 | 1.62E-02 |
| Alloscardovia                | genus.Alloscardovia.id.435                  | 0.2192  | 0.2256 | 3.70E-01 | 0.2090  | 0.1087 | 9.05E-02 | 0.2140  | 2.5459 | 1.20E-02 | 1.68E-02 |
| PrevotellaceaeUCG003         | genus.PrevotellaceaeUCG003.id.11187         | -0.5024 | 0.2433 | 6.54E-02 | -0.0881 | 0.0595 | 1.97E-01 | -0.2104 | 2.5012 | 1.36E-02 | 1.88E-02 |
| LachnospiraceaeUCG001        | genus.LachnospiraceaeUCG001.id.11321        | -0.4238 | 0.1634 | 1.10E-02 | -0.1028 | 0.0433 | 1.90E-02 | -0.2087 | 2.4799 | 1.44E-02 | 1.99E-02 |
| Syntrophomonadaceae          | family.Syntrophomonadaceae.id.2072          | -0.4028 | 0.3220 | 2.47E-01 | -0.1059 | 0.1000 | 3.20E-01 | -0.2065 | 2.4522 | 1.55E-02 | 2.13E-02 |
| Alloprevotella               | genus.Alloprevotella.id.961                 | -0.4233 | 0.2825 | 1.78E-01 | -0.0976 | 0.0577 | 1.34E-01 | -0.2033 | 2.4121 | 1.72E-02 | 2.36E-02 |
| Burkholderiaceae             | family.Burkholderiaceae.id.2899             | -0.6488 | 0.4877 | 2.18E-01 | -0.0630 | 0.0948 | 5.26E-01 | -0.2022 | 2.3990 | 1.78E-02 | 2.43E-02 |
| Prevotella1                  | genus.Prevotella1.id.11179                  | -0.3778 | 0.3670 | 3.32E-01 | -0.1071 | 0.0703 | 1.69E-01 | -0.2011 | 2.3855 | 1.84E-02 | 2.50E-02 |
| Bifidobacteriaceae           | family.Bifidobacteriaceae.id.433            | 0.3110  | 0.1402 | 2.86E-02 | 0.1245  | 0.0505 | 1.51E-02 | 0.1968  | 2.3317 | 2.12E-02 | 2.87E-02 |
| Aerococcaceae                | family.Aerococcaceae.id.1802                | 0.6551  | 0.2522 | 3.26E-02 | 0.0576  | 0.0796 | 4.87E-01 | 0.1943  | 2.3016 | 2.29E-02 | 3.08E-02 |
| Gardnerella                  | genus.Gardnerella.id.437                    | -0.4827 | 0.1605 | 4.06E-03 | -0.0775 | 0.0493 | 1.31E-01 | -0.1934 | 2.2899 | 2.36E-02 | 3.16E-02 |
| Staphylococcaceae            | family.Staphylococcaceae.id.1775            | -0.4437 | 0.2754 | 1.81E-01 | -0.0827 | 0.0469 | 1.43E-01 | -0.1916 | 2.2683 | 2.49E-02 | 3.32E-02 |
| Porphyromonas                | genus.Porphyromonas.id.956                  | -0.7468 | 0.2610 | 8.20E-03 | -0.0480 | 0.0431 | 3.11E-01 | -0.1894 | 2.2414 | 2.66E-02 | 3.54E-02 |
| Bifidobacterium              | genus.Bifidobacterium.id.436                | 0.3304  | 0.1595 | 5.04E-02 | 0.1080  | 0.0474 | 2.46E-02 | 0.1889  | 2.2348 | 2.71E-02 | 3.58E-02 |
| Eubacteriumnodatumgroup      | genus.Eubacteriumnodatumgroup.id.11297      | -0.4067 | 0.2223 | 1.08E-01 | -0.0850 | 0.0658 | 2.52E-01 | -0.1859 | 2.1985 | 2.96E-02 | 3.89E-02 |
| Bacteroidaceae               | family.Bacteroidaceae.id.917                | -0.5277 | 0.1867 | 1.84E-02 | -0.0628 | 0.1319 | 6.48E-01 | -0.1820 | 2.1503 | 3.33E-02 | 4.34E-02 |
| Bacteroides                  | genus.Bacteroides.id.918                    | -0.5277 | 0.1867 | 1.84E-02 | -0.0628 | 0.1319 | 6.48E-01 | -0.1820 | 2.1503 | 3.33E-02 | 4.34E-02 |
| Prevotella7                  | genus.Prevotella7.id.11182                  | -0.5585 | 0.2108 | 1.89E-02 | -0.0583 | 0.1066 | 5.98E-01 | -0.1804 | 2.1314 | 3.49E-02 | 4.52E-02 |
| Lactobacillus                | genus.Lactobacillus.id.1837                 | -0.4572 | 0.3337 | 2.13E-01 | -0.0709 | 0.0424 | 1.97E-01 | -0.1801 | 2.1272 | 3.52E-02 | 4.55E-02 |
| Mogibacterium                | genus.Mogibacterium.id.1960                 | -0.3635 | 0.2060 | 1.13E-01 | -0.0870 | 0.0776 | 2.98E-01 | -0.1779 | 2.1001 | 3.76E-02 | 4.83E-02 |
| Bilophila                    | genus.Bilophila.id.3170                     | -0.1613 | 0.3724 | 6.73E-01 | -0.1941 | 0.1348 | 1.91E-01 | -0.1770 | 2.0890 | 3.86E-02 | 4.94E-02 |
| Carnobacterium               | genus.Carnobacterium.id.1818                | -0.2087 | 0.1180 | 8.13E-02 | -0.1469 | 0.0842 | 1.78E-01 | -0.1751 | 2.0665 | 4.07E-02 | 5.18E-02 |
| Prevotella2                  | genus.Prevotella2.id.11180                  | -0.3906 | 0.2300 | 1.54E-01 | -0.0784 | 0.0756 | 3.89E-01 | -0.1750 | 2.0652 | 4.08E-02 | 5.18E-02 |
| Roseburia                    | genus.Roseburia.id.2012                     | 0.3847  | 0.1943 | 9.70E-02 | 0.0731  | 0.0701 | 3.09E-01 | 0.1677  | 1.9768 | 5.01E-02 | 6.34E-02 |
| Ezakiella                    | genus.Ezakiella.id.11289                    | -0.2854 | 0.2133 | 2.38E-01 | -0.0952 | 0.0563 | 2.06E-01 | -0.1649 | 1.9420 | 5.42E-02 | 6.83E-02 |



|                            |                                           |         |        |          |         |        |          |         |        |          |          |
|----------------------------|-------------------------------------------|---------|--------|----------|---------|--------|----------|---------|--------|----------|----------|
| Planococcaceae             | family.Planococcaceae.id.1753             | 0.2811  | 0.2185 | 2.20E-01 | 0.0923  | 0.0898 | 3.34E-01 | 0.1611  | 1.8960 | 6.01E-02 | 7.54E-02 |
| Anaerococcus               | genus.Anaerococcus.id.1937                | 0.3047  | 0.3061 | 3.46E-01 | 0.0830  | 0.0665 | 2.53E-01 | 0.1590  | 1.8714 | 6.35E-02 | 7.90E-02 |
| Murdochella                | genus.Murdochella.id.1944                 | -0.3205 | 0.2842 | 3.04E-01 | -0.0789 | 0.0563 | 2.22E-01 | -0.1590 | 1.8712 | 6.35E-02 | 7.90E-02 |
| Faecalicoccus              | genus.Faecalicoccus.id.11391              | 0.3563  | 0.3743 | 3.78E-01 | 0.0701  | 0.0601 | 2.99E-01 | 0.1580  | 1.8595 | 6.51E-02 | 8.08E-02 |
| Mitsuokella                | genus.Mitsuokella.id.2186                 | -0.3024 | 0.1490 | 5.20E-01 | -0.0758 | 0.0225 | 9.85E-04 | -0.1514 | 1.7792 | 7.75E-02 | 9.57E-02 |
| Coprococcus3               | genus.Coprococcus3.id.11303               | 0.3119  | 0.2666 | 2.78E-01 | 0.0717  | 0.0735 | 3.67E-01 | 0.1495  | 1.7573 | 8.11E-02 | 9.97E-02 |
| Granulicatella             | genus.Granulicatella.id.1821              | 0.2997  | 0.1763 | 1.62E-01 | 0.0745  | 0.1266 | 5.87E-01 | 0.1494  | 1.7561 | 8.13E-02 | 9.97E-02 |
| Victivallaceae             | family.Victivallaceae.id.2255             | -0.3569 | 0.2029 | 8.51E-02 | -0.0609 | 0.0356 | 8.98E-02 | -0.1475 | 1.7325 | 8.55E-02 | 1.04E-01 |
| Hungatella                 | genus.Hungatella.id.11306                 | -0.4109 | 0.2889 | 1.61E-01 | -0.0523 | 0.0324 | 1.44E-01 | -0.1466 | 1.7221 | 8.73E-02 | 1.06E-01 |
| Lactococcus                | genus.Lactococcus.id.1851                 | -0.2971 | 0.2846 | 3.33E-01 | -0.0718 | 0.0767 | 3.90E-01 | -0.1461 | 1.7156 | 8.85E-02 | 1.07E-01 |
| Coprobacter                | genus.Coprobacter.id.949                  | -0.4500 | 0.1658 | 1.39E-02 | -0.0459 | 0.0813 | 5.90E-01 | -0.1438 | 1.6879 | 9.37E-02 | 1.13E-01 |
| Acidaminococcus            | genus.Acidaminococcus.id.2167             | 0.1560  | 0.1180 | 1.94E-01 | 0.1297  | 0.0740 | 1.10E-01 | 0.1423  | 1.6702 | 9.72E-02 | 1.17E-01 |
| Staphylococcus             | genus.Staphylococcus.id.1780              | -0.2199 | 0.3364 | 5.34E-01 | -0.0848 | 0.0562 | 1.73E-01 | -0.1366 | 1.6019 | 1.12E-01 | 1.34E-01 |
| LachnospiraceaeUCG010      | genus.LachnospiraceaeUCG010.id.11330      | 0.2649  | 0.1118 | 2.12E-02 | 0.0685  | 0.1026 | 5.40E-01 | 0.1347  | 1.5798 | 1.17E-01 | 1.39E-01 |
| Lactobacillaceae           | family.Lactobacillaceae.id.1836           | -0.3807 | 0.3454 | 3.06E-01 | -0.0475 | 0.0452 | 3.67E-01 | -0.1345 | 1.5775 | 1.17E-01 | 1.39E-01 |
| Peptostreptococcus         | genus.Peptostreptococcus.id.2045          | 0.4159  | 0.2099 | 5.02E-02 | 0.0425  | 0.0379 | 3.96E-01 | 0.1330  | 1.5592 | 1.21E-01 | 1.44E-01 |
| Actinomyces                | genus.Actinomyces.id.423                  | 0.1973  | 0.2855 | 5.13E-01 | 0.0870  | 0.1000 | 4.18E-01 | 0.1310  | 1.5357 | 1.27E-01 | 1.50E-01 |
| Actinomycetaceae           | family.Actinomycetaceae.id.421            | 0.2695  | 0.2398 | 3.03E-01 | 0.0629  | 0.0880 | 5.01E-01 | 0.1302  | 1.5255 | 1.29E-01 | 1.52E-01 |
| Lawsonella                 | genus.Lawsonella.id.14206                 | -0.1739 | 0.3349 | 6.14E-01 | -0.0972 | 0.0726 | 2.16E-01 | -0.1300 | 1.5236 | 1.30E-01 | 1.52E-01 |
| Coriobacteriaceae          | family.Coriobacteriaceae.id.811           | -0.1932 | 0.3719 | 6.17E-01 | -0.0866 | 0.0546 | 1.54E-01 | -0.1294 | 1.5158 | 1.32E-01 | 1.54E-01 |
| Streptococcus              | genus.Streptococcus.id.1853               | 0.1849  | 0.2143 | 4.12E-01 | 0.0895  | 0.1223 | 4.95E-01 | 0.1286  | 1.5071 | 1.34E-01 | 1.56E-01 |
| Bacillaceae                | family.Bacillaceae.id.1680                | 0.3489  | 0.2554 | 1.82E-01 | 0.0471  | 0.0302 | 1.21E-01 | 0.1283  | 1.5027 | 1.35E-01 | 1.57E-01 |
| Faecalibacterium           | genus.Faecalibacterium.id.2057            | -0.2517 | 0.2571 | 3.62E-01 | -0.0642 | 0.0942 | 5.16E-01 | -0.1271 | 1.4890 | 1.39E-01 | 1.60E-01 |
| Catenibacterium            | genus.Catenibacterium.id.2153             | -0.1617 | 0.3168 | 6.27E-01 | -0.0998 | 0.0872 | 3.04E-01 | -0.1270 | 1.4878 | 1.39E-01 | 1.60E-01 |
| LachnospiraceaeNK3A20group | genus.LachnospiraceaeNK3A20group.id.11318 | 0.1995  | 0.2345 | 4.36E-01 | 0.0762  | 0.0421 | 1.53E-01 | 0.1233  | 1.4437 | 1.51E-01 | 1.73E-01 |
| Mobiluncus                 | genus.Mobiluncus.id.425                   | -0.5256 | 0.3333 | 1.84E-01 | -0.0279 | 0.0397 | 4.91E-01 | -0.1211 | 1.4177 | 1.59E-01 | 1.80E-01 |
| Streptococcaceae           | family.Streptococcaceae.id.1850           | 0.1468  | 0.2132 | 5.13E-01 | 0.0999  | 0.1271 | 4.62E-01 | 0.1211  | 1.4176 | 1.59E-01 | 1.80E-01 |
| Dialister                  | genus.Dialister.id.2183                   | -0.3134 | 0.1719 | 8.84E-02 | -0.0418 | 0.0534 | 4.44E-01 | -0.1145 | 1.3387 | 1.83E-01 | 2.07E-01 |
| Corynebacterium            | genus.Corynebacterium.id.449              | -0.6323 | 0.2101 | 8.57E-03 | -0.0195 | 0.1206 | 8.75E-01 | -0.1111 | 1.2992 | 1.96E-01 | 2.21E-01 |
| Ruminiclostridium5         | genus.Ruminiclostridium5.id.11355         | -0.1017 | 0.3340 | 7.68E-01 | -0.1169 | 0.0996 | 2.82E-01 | -0.1090 | 1.2742 | 2.05E-01 | 2.30E-01 |
| Bacillus                   | genus.Bacillus.id.1688                    | 0.4958  | 0.5098 | 3.54E-01 | 0.0237  | 0.1109 | 8.36E-01 | 0.1083  | 1.2662 | 2.08E-01 | 2.32E-01 |
| Eisenbergiella             | genus.Eisenbergiella.id.11304             | -0.2612 | 0.2392 | 2.82E-01 | -0.0409 | 0.0505 | 4.77E-01 | -0.1034 | 1.2073 | 2.29E-01 | 2.54E-01 |
| Aggregatibacter            | genus.Aggregatibacter.id.3691             | 0.1336  | 0.4184 | 7.58E-01 | 0.0791  | 0.0852 | 3.87E-01 | 0.1028  | 1.2007 | 2.32E-01 | 2.56E-01 |
| Cryptobacterium            | genus.Cryptobacterium.id.817              | -0.0941 | 0.2274 | 6.95E-01 | -0.1096 | 0.0805 | 2.14E-01 | -0.1015 | 1.1858 | 2.38E-01 | 2.62E-01 |
| Campylobacteraceae         | family.Campylobacteraceae.id.3273         | -0.0804 | 0.2011 | 6.99E-01 | -0.1111 | 0.1111 | 3.40E-01 | -0.0945 | 1.1030 | 2.72E-01 | 2.97E-01 |
| Moraxellaceae              | family.Moraxellaceae.id.3710              | 0.4794  | 0.3463 | 2.14E-01 | 0.0179  | 0.0327 | 6.42E-01 | 0.0925  | 1.0795 | 2.82E-01 | 3.08E-01 |
| ErysipelotrichaceaeUCG003  | genus.ErysipelotrichaceaeUCG003.id.11384  | 0.2126  | 0.1947 | 3.15E-01 | 0.0393  | 0.0851 | 6.65E-01 | 0.0915  | 1.0672 | 2.88E-01 | 3.13E-01 |
| Synergistaceae             | family.Synergistaceae.id.3901             | -0.1700 | 0.3755 | 6.77E-01 | -0.0469 | 0.0514 | 4.00E-01 | -0.0893 | 1.0418 | 2.99E-01 | 3.24E-01 |
| Coprobacillus              | genus.Coprobacillus.id.2154               | 0.0737  | 0.4239 | 8.66E-01 | 0.0959  | 0.0758 | 2.47E-01 | 0.0841  | 0.9801 | 3.29E-01 | 3.55E-01 |
| Verrucomicrobiaceae        | family.Verrucomicrobiaceae.id.4036        | -0.0682 | 0.1761 | 7.12E-01 | -0.1024 | 0.1158 | 4.05E-01 | -0.0836 | 0.9743 | 3.32E-01 | 3.55E-01 |
| Akkermansia                | genus.Akkermansia.id.4037                 | -0.0682 | 0.1761 | 7.12E-01 | -0.1024 | 0.1158 | 4.05E-01 | -0.0836 | 0.9743 | 3.32E-01 | 3.55E-01 |
| Erysipelotrichaceae        | family.Erysipelotrichaceae.id.2149        | 0.1606  | 0.1935 | 4.38E-01 | 0.0409  | 0.0545 | 5.09E-01 | 0.0811  | 0.9454 | 3.46E-01 | 3.69E-01 |
| Listeriaceae               | family.Listeriaceae.id.1737               | -0.1336 | 0.1934 | 5.13E-01 | -0.0492 | 0.1022 | 6.43E-01 | -0.0811 | 0.9449 | 3.46E-01 | 3.69E-01 |
| Ruminococcusgavreauiigroup | genus.Ruminococcusgavreauiigroup.id.11342 | 0.2542  | 0.1669 | 2.10E-01 | 0.0238  | 0.0793 | 7.81E-01 | 0.0779  | 0.9075 | 3.66E-01 | 3.88E-01 |
| Collinsella                | genus.Collinsella.id.815                  | 0.1074  | 0.3026 | 7.32E-01 | 0.0417  | 0.0501 | 4.36E-01 | 0.0669  | 0.7793 | 4.37E-01 | 4.61E-01 |
| Adlercreutzia              | genus.Adlercreutzia.id.812                | 0.4665  | 0.2029 | 5.64E-02 | 0.0095  | 0.2229 | 9.67E-01 | 0.0666  | 0.7754 | 4.39E-01 | 4.61E-01 |

|                          |                                         |         |        |          |         |        |          |         |        |          |          |
|--------------------------|-----------------------------------------|---------|--------|----------|---------|--------|----------|---------|--------|----------|----------|
| Erysipelatoclostridium   | genus.Erysipelatoclostridium.id.11381   | -0.1103 | 0.1982 | 5.79E-01 | -0.0388 | 0.0368 | 2.96E-01 | -0.0654 | 0.7619 | 4.47E-01 | 4.68E-01 |
| Catenisphaera            | genus.Catenisphaera.id.14395            | -0.2442 | 0.3013 | 4.51E-01 | -0.0170 | 0.0679 | 8.10E-01 | -0.0645 | 0.7513 | 4.54E-01 | 4.73E-01 |
| EscherichiaShigella      | genus.EscherichiaShigella.id.3504       | 0.2336  | 0.2361 | 3.50E-01 | 0.0145  | 0.0803 | 8.61E-01 | 0.0582  | 0.6772 | 4.99E-01 | 5.19E-01 |
| Enterococcaceae          | family.Enterococcaceae.id.1828          | -0.0621 | 0.2172 | 8.09E-01 | -0.0511 | 0.0592 | 4.32E-01 | -0.0563 | 0.6556 | 5.13E-01 | 5.32E-01 |
| Eubacteriumsaphenumgroup | genus.Eubacteriumsaphenumgroup.id.14363 | 0.1776  | 0.4386 | 6.97E-01 | 0.0157  | 0.0615 | 8.13E-01 | 0.0528  | 0.6143 | 5.40E-01 | 5.56E-01 |
| Stomatobaculum           | genus.Stomatobaculum.id.2015            | -0.0945 | 0.3048 | 7.66E-01 | -0.0276 | 0.0461 | 5.67E-01 | -0.0511 | 0.5943 | 5.53E-01 | 5.66E-01 |
| Carnobacteriaceae        | family.Carnobacteriaceae.id.1811        | 0.1656  | 0.1699 | 3.88E-01 | 0.0131  | 0.1131 | 9.14E-01 | 0.0466  | 0.5418 | 5.89E-01 | 6.00E-01 |
| Sutterella               | genus.Sutterella.id.2896                | -0.2209 | 0.2431 | 3.85E-01 | -0.0088 | 0.1116 | 9.39E-01 | -0.0441 | 0.5133 | 6.09E-01 | 6.18E-01 |
| Campylobacter            | genus.Campylobacter.id.3275             | -0.0325 | 0.2011 | 8.76E-01 | -0.0469 | 0.1187 | 7.00E-01 | -0.0390 | 0.4538 | 6.51E-01 | 6.59E-01 |
| Pseudomonas              | genus.Pseudomonas.id.3723               | -0.2648 | 0.2068 | 2.14E-01 | -0.0033 | 0.0711 | 9.69E-01 | -0.0297 | 0.3448 | 7.31E-01 | 7.35E-01 |
| Lachnoanaerobaculum      | genus.Lachnoanaerobaculum.id.2003       | 0.3856  | 0.2951 | 2.39E-01 | 0.0008  | 0.0646 | 9.91E-01 | 0.0170  | 0.1981 | 8.43E-01 | 8.46E-01 |
| Allisonella              | genus.Allisonella.id.2174               | 0.0006  | 0.2950 | 9.99E-01 | 0.0031  | 0.0783 | 9.70E-01 | 0.0013  | 0.0152 | 9.88E-01 | 9.88E-01 |
| Pseudomonadaceae         | family.Pseudomonadaceae.id.3718         | -0.2997 | 0.2129 | 1.79E-01 | 0.0473  | 0.1078 | 7.02E-01 | Inf     | NA     | NA       | NA       |
| Succinivibrio            | genus.Succinivibrio.id.3331             | -0.1840 | 0.2358 | 4.64E-01 | 0.0733  | 0.0695 | 3.26E-01 | Inf     | NA     | NA       | NA       |
| Tyzzerella4              | genus.Tyzzerella4.id.11336              | 0.4029  | 0.4931 | 4.36E-01 | -0.0473 | 0.0729 | 5.33E-01 | Inf     | NA     | NA       | NA       |
| Prevotella6              | genus.Prevotella6.id.11181              | -0.0575 | 0.4232 | 8.98E-01 | 0.0426  | 0.0367 | 2.74E-01 | Inf     | NA     | NA       | NA       |
| Acinetobacter            | genus.Acinetobacter.id.3711             | 0.3364  | 0.3114 | 3.26E-01 | -0.0067 | 0.0382 | 8.75E-01 | Inf     | NA     | NA       | NA       |
| Succiniclasticum         | genus.Succiniclasticum.id.2169          | -0.2369 | 0.4658 | 6.26E-01 | 0.0310  | 0.0397 | 4.55E-01 | Inf     | NA     | NA       | NA       |
| LachnospiraceaeUCG007    | genus.LachnospiraceaeUCG007.id.11327    | 0.2575  | 0.3024 | 3.98E-01 | -0.0158 | 0.0435 | 7.51E-01 | Inf     | NA     | NA       | NA       |
| Veillonellaceae          | family.Veillonellaceae.id.2172          | -0.0539 | 0.1578 | 7.35E-01 | 0.0401  | 0.0482 | 4.11E-01 | Inf     | NA     | NA       | NA       |
| Leptotrichia             | genus.Leptotrichia.id.2216              | -0.3248 | 0.2963 | 3.38E-01 | 0.0003  | 0.0456 | 9.96E-01 | Inf     | NA     | NA       | NA       |
| Enterococcus             | genus.Enterococcus.id.1831              | 0.0936  | 0.1872 | 6.20E-01 | -0.0403 | 0.0629 | 5.47E-01 | Inf     | NA     | NA       | NA       |
| Corynebacteriaceae       | family.Corynebacteriaceae.id.448        | -0.2832 | 0.3173 | 4.03E-01 | 0.0244  | 0.1440 | 8.71E-01 | Inf     | NA     | NA       | NA       |
| vadinBE97                | family.vadinBE97.id.14446               | -0.2930 | 0.3828 | 4.68E-01 | 0.0200  | 0.0679 | 7.86E-01 | Inf     | NA     | NA       | NA       |
| Morganella               | genus.Morganella.id.3512                | -0.1137 | 0.4085 | 7.88E-01 | 0.0484  | 0.0675 | 4.93E-01 | Inf     | NA     | NA       | NA       |
| Enterobacteriaceae       | family.Enterobacteriaceae.id.3469       | 0.1283  | 0.1865 | 5.11E-01 | -0.0165 | 0.0910 | 8.60E-01 | Inf     | NA     | NA       | NA       |
| Succinivibrionaceae      | family.Succinivibrionaceae.id.3326      | -0.0656 | 0.1976 | 7.51E-01 | 0.0353  | 0.0594 | 5.85E-01 | Inf     | NA     | NA       | NA       |
| Parasporobacterium       | genus.Parasporobacterium.id.2009        | 0.2238  | 0.2991 | 4.79E-01 | -0.0047 | 0.0528 | 9.33E-01 | Inf     | NA     | NA       | NA       |
| Sneathia                 | genus.Sneathia.id.2218                  | -0.1245 | 0.2229 | 5.83E-01 | 0.0168  | 0.0784 | 8.37E-01 | Inf     | NA     | NA       | NA       |
| CandidatusSoleaferrea    | genus.CandidatusSoleaferrea.id.11350    | 0.0151  | 0.2002 | 9.42E-01 | -0.0720 | 0.1102 | 5.29E-01 | Inf     | NA     | NA       | NA       |
| FamilyXIIIUCG002         | genus.FamilyXIIIUCG002.id.11295         | 0.1112  | 0.3376 | 7.50E-01 | -0.0275 | 0.0645 | 6.80E-01 | Inf     | NA     | NA       | NA       |
| Eubacterium              | genus.Eubacterium.id.1932               | -0.0183 | 0.2559 | 9.47E-01 | 0.0796  | 0.1059 | 5.47E-01 | Inf     | NA     | NA       | NA       |
| Weissella                | genus.Weissella.id.1843                 | 0.0178  | 0.4372 | 9.69E-01 | -0.0475 | 0.0773 | 5.53E-01 | Inf     | NA     | NA       | NA       |
| Veillonella              | genus.Veillonella.id.2198               | -0.1271 | 0.2605 | 6.38E-01 | 0.0307  | 0.1475 | 8.43E-01 | Inf     | NA     | NA       | NA       |
| Corynebacterium1         | genus.Corynebacterium1.id.11143         | -0.1097 | 0.4306 | 8.05E-01 | 0.0393  | 0.0995 | 7.10E-01 | Inf     | NA     | NA       | NA       |

## Figure Legends

### eFigure 1. Results of metabolome-wide association analysis

Left Y-axis shows effect estimates and right Y-axis shows the strength of association. Red dashed line is FDR=0.05.

Symbols denote the  $-\log_{10}(\text{FDR})$ . Lines denote the effect estimates from the four models. Red colour illustrates the findings from model 1, Blue colour illustrates the findings from model 2, green colour illustrates the findings from model 3 and yellow colour illustrates the findings from model 4.

Model 1:  $\text{MDD} \sim \text{age} + \text{sex} + \text{ethnicity} + \text{fasting time} + \text{technical covariates}$

Model 2:  $\text{MDD} \sim \text{age} + \text{sex} + \text{ethnicity} + \text{fasting time} + \text{technical covariates} + \text{BMI}$

Model 3:  $\text{MDD} \sim \text{age} + \text{sex} + \text{ethnicity} + \text{fasting time} + \text{technical covariates} + \text{BMI} + \text{antidepressants}$

Model 4:  $\text{MDD} \sim \text{age} + \text{sex} + \text{ethnicity} + \text{fasting time} + \text{technical covariates} + \text{BMI} + \text{antidepressants} + \text{education} + \text{smoking} + \text{alcohol intake} + \text{physical activity} + \text{PPI} + \text{antidiabetics} + \text{antihypertensives} + \text{lipid modifying agents} + \text{sleep medication}$

**eFigure 2.** Results of metabolome-wide association analysis for lifetime MDD and recurrent MDD for model 1. Red is increased in MDD and blue are decreased in MDD. Star shows a significant FDR p-value.

**eFigure 3.** Results of metabolome-wide association analysis for lifetime MDD and recurrent MDD for model 2. Red is increased in MDD and blue are decreased in MDD. Star shows a significant FDR p-value.

**eFigure 4.** Results of metabolome-wide association analysis for lifetime MDD and recurrent MDD for model 3. Red is increased in MDD and blue are decreased in MDD. Star shows a significant FDR p-value.

**eFigure 5.** Results of metabolome-wide association analysis for lifetime MDD and recurrent MDD for model 4. Red is increased in MDD and blue are decreased in MDD. Star shows a significant FDR p-value.

**eFigure 6.** Correlation structure of 124 metabolites associated with lifetime major depression

**eFigure 7.** Scatter plot of effect estimates (MDD) from model 4 and sensitivity analysis by removing individuals on antidepressants

**eFigure 8.** Significantly associated metabolites with MDD in model 4 and the results of replication in BBMRI-NL study. Red is increased in MDD and Blue is decreased in MDD. Star depicts a significant association after correcting for multiple testing.

**eFigure 9.** Results of Mendelian Randomization for the 124 associated metabolites in model 4. The first column from the left shows the direction of association of 124 significantly associated metabolites with MDD (Z-scores). Blue is negative association and red is positive association. The second column shows the results of the Mendelian randomization (MR) analysis when MDD is the exposure and microbiome is the outcome. The third column depicts the results of MR when metabolites were used as exposure and MDD outcome. Black stars represent significant ones after correcting for multiple testing using FDR.

**eFigure 10.** Scatter plot of direct and proxy association of microbiome with major depression. Taxa that have a p-value < 0.05 in both proxy and direct association are annotated. Each dot represents a microbial taxon. X-axis depicts the proxy association (T-scores) between microbial taxa and MDD inferred through their metabolic signatures and Y-axis depicts the direct association of microbial taxa with MDD (Z-scores) from the Rotterdam study performed in Radjabzadeh et al. 2022. Taxa that are nominally significant in both proxy and direct associations are annotated.

**eFigure 11.** Hierarchical illustration of all healthy and pathogenic bacteria that showed significant correlation ( $r > 0.3$  &  $FDR < 0.05$ ) with MDD metabolic profile. Red dots represent significant negative proxy association between microbial taxa and MDD and green dots represent significant positive proxy association between microbial taxa and MDD. The outermost layer depicts the phylum followed by, class, order, family and genus.

eFigure 1. Results of metabolome-wide association analysis

eFigure 1

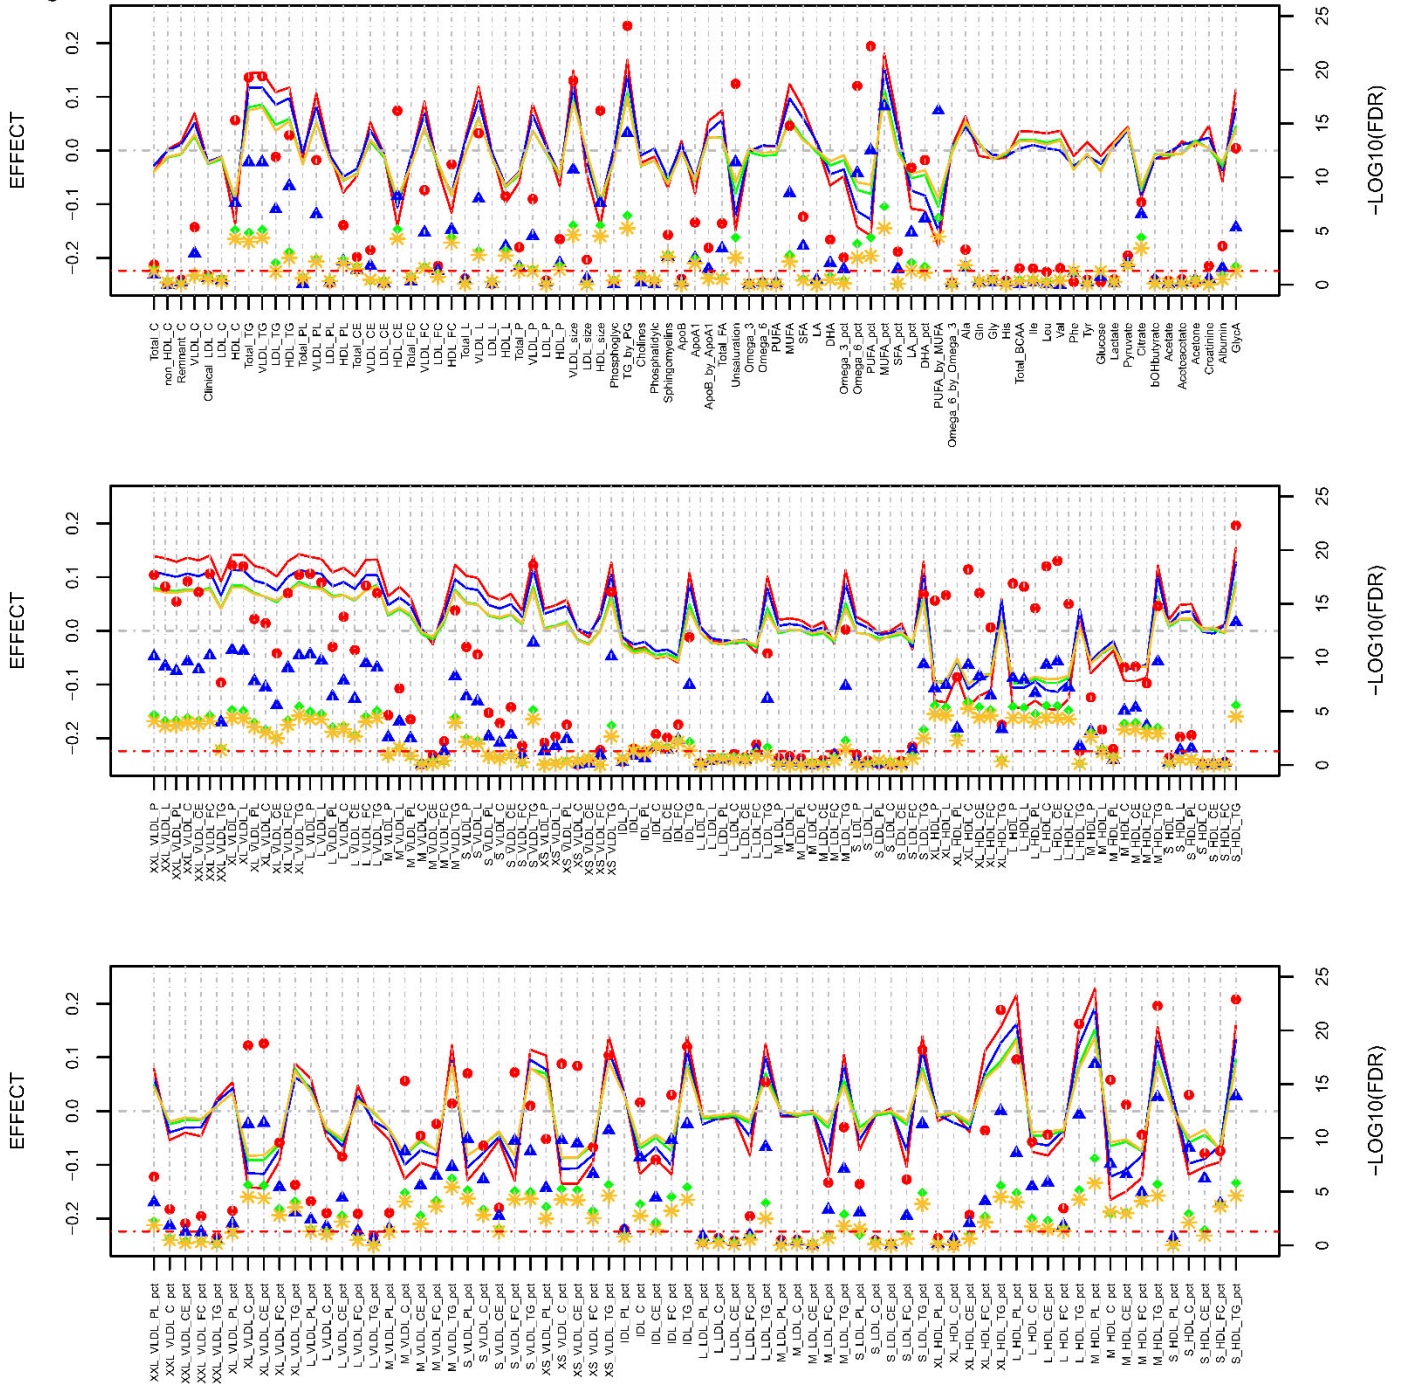

eFigure 2. Results of metabolome-wide association analysis for lifetime MDD and recurrent MDD for model 1

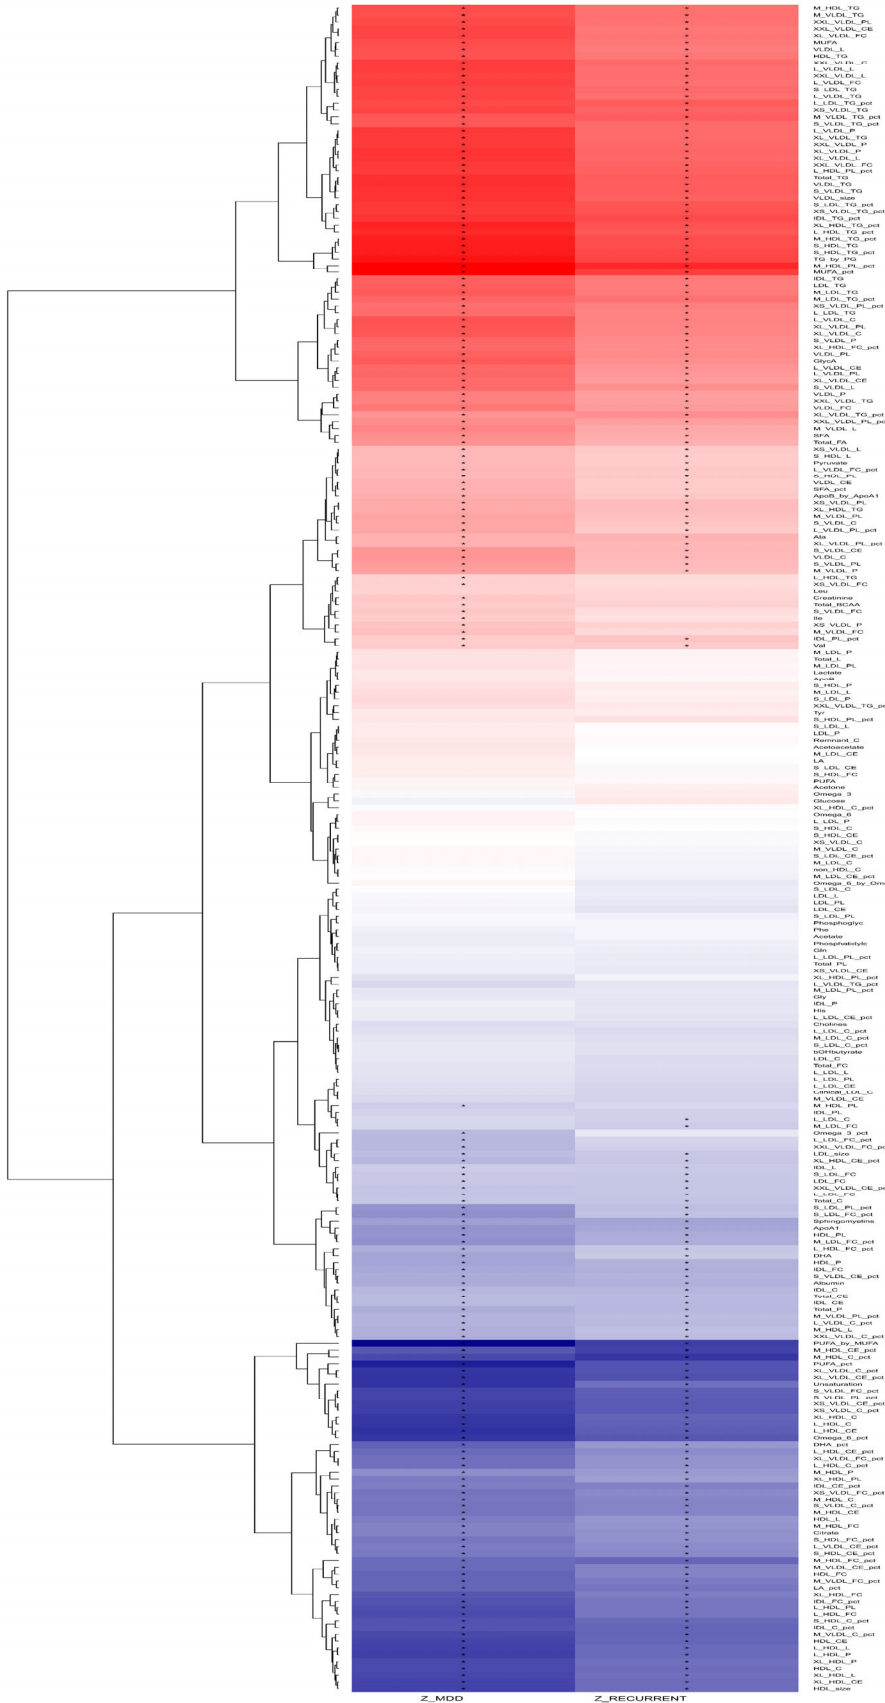

eFigure 3. Results of metabolome-wide association analysis for lifetime MDD and recurrent MDD for model 2

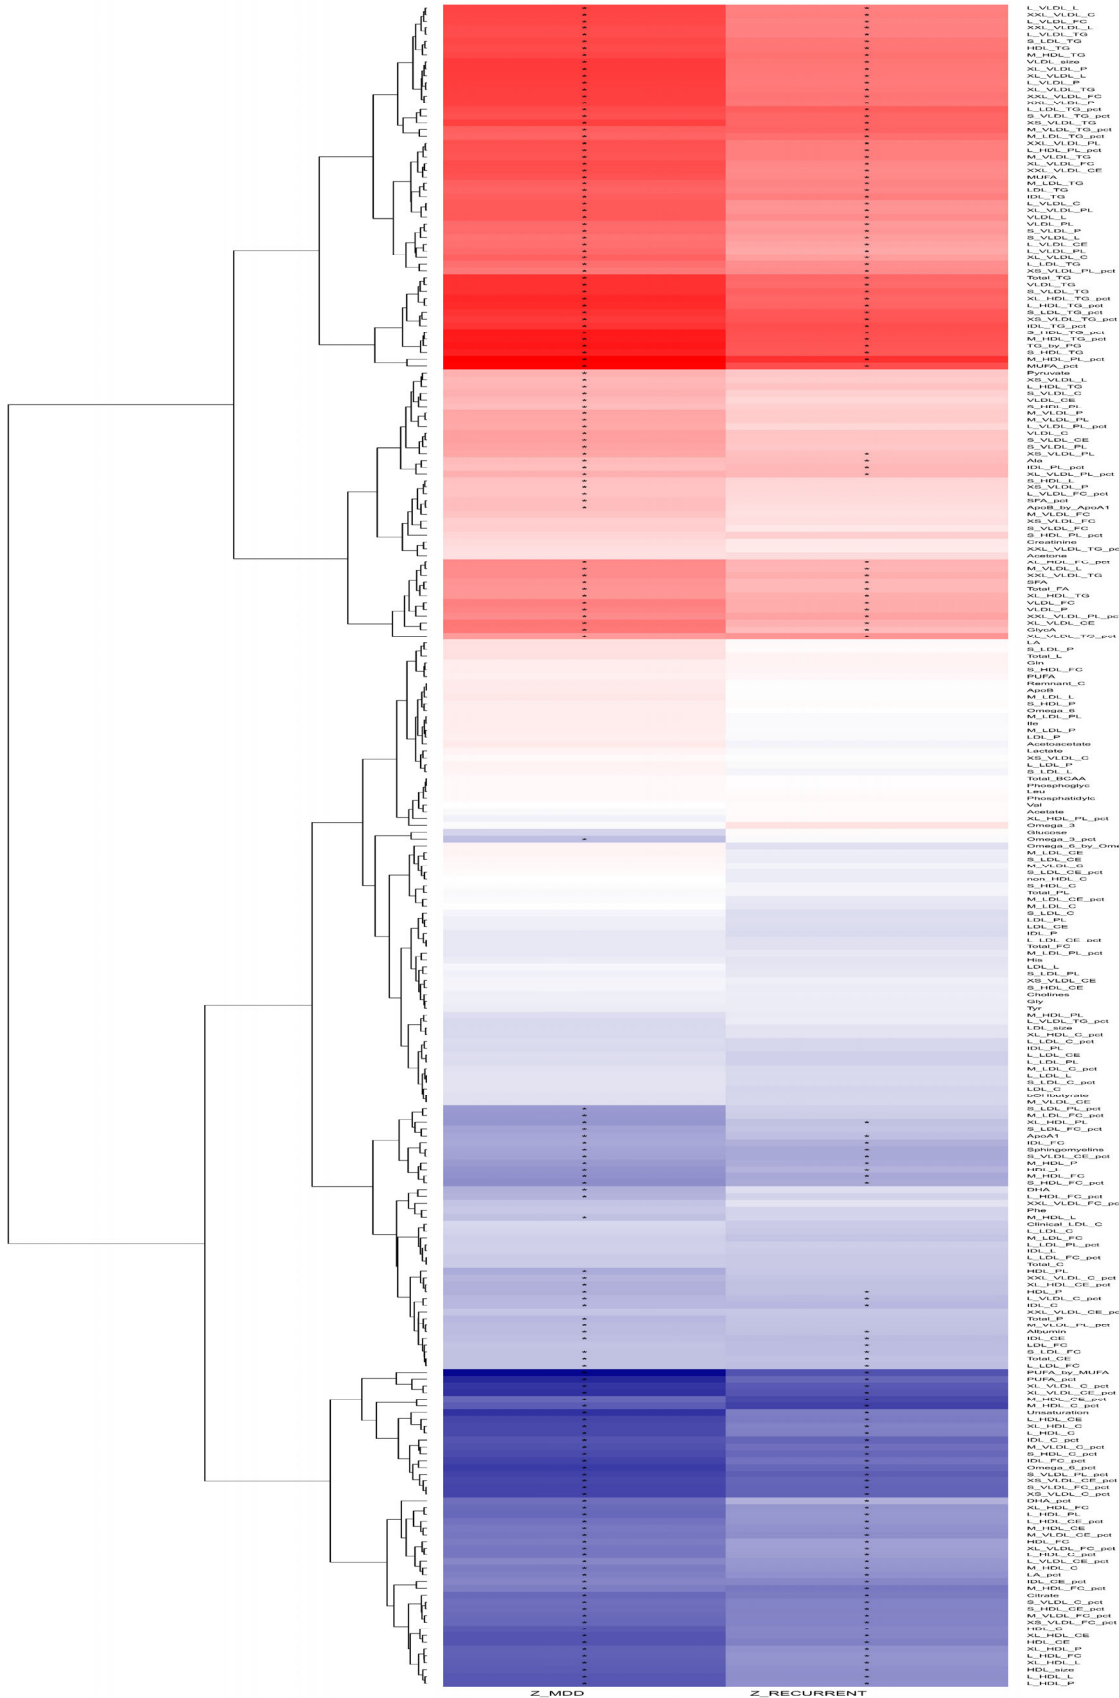





**eFigure 4. Results of metabolome-wide association analysis for lifetime MDD and recurrent MDD for model 3**

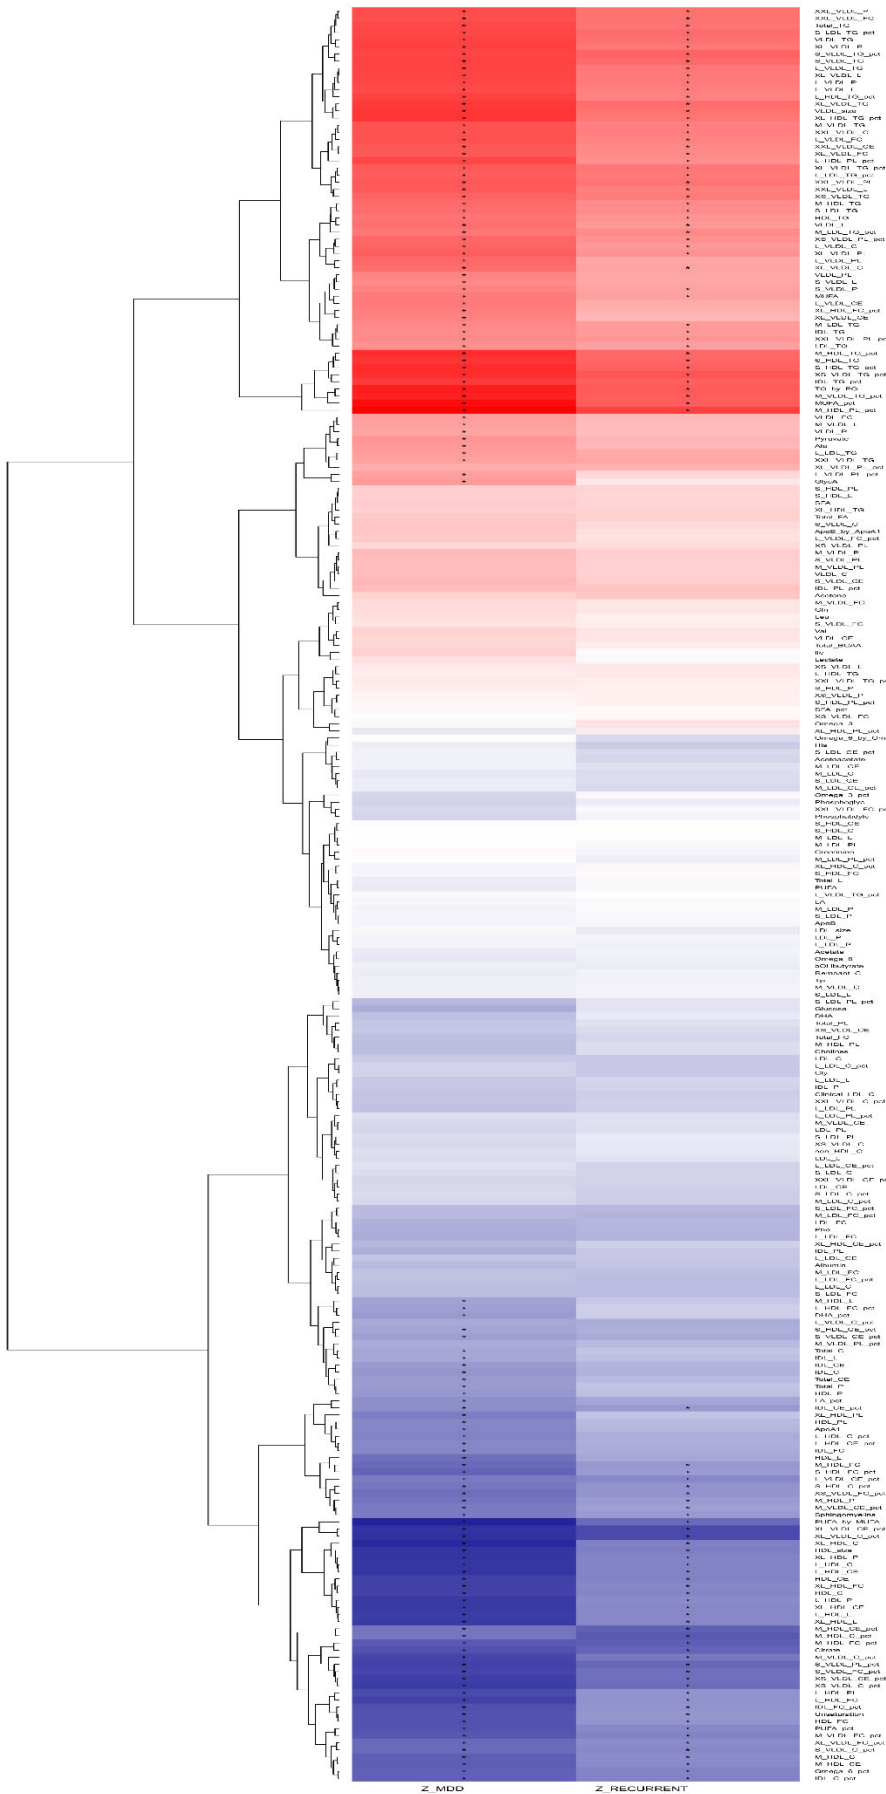

**eFigure 5. Results of metabolome-wide association analysis for lifetime MDD and recurrent MDD for model 4**



eFigure 6. Correlation structure of 124 metabolites associated with lifetime major depression

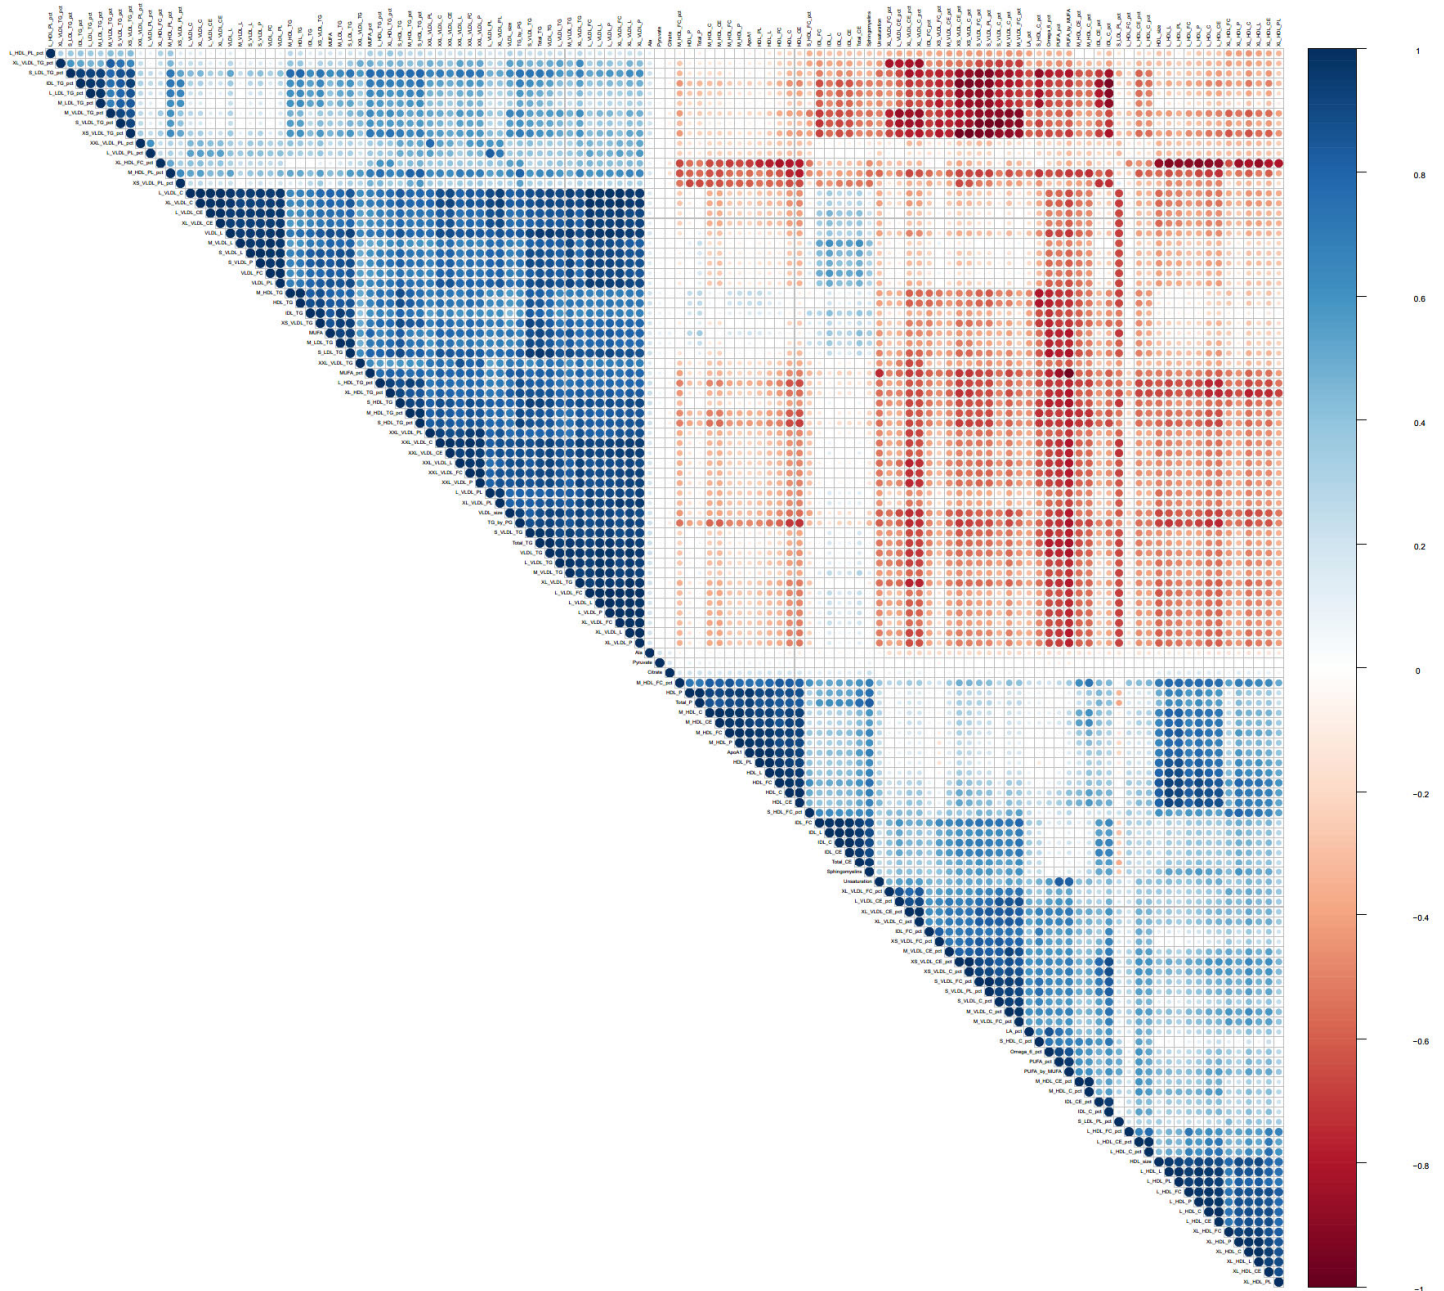

eFigure 7. Scatter plot of effect estimates (MDD) from model 4 and sensitivity analysis by removing individuals on antidepressants

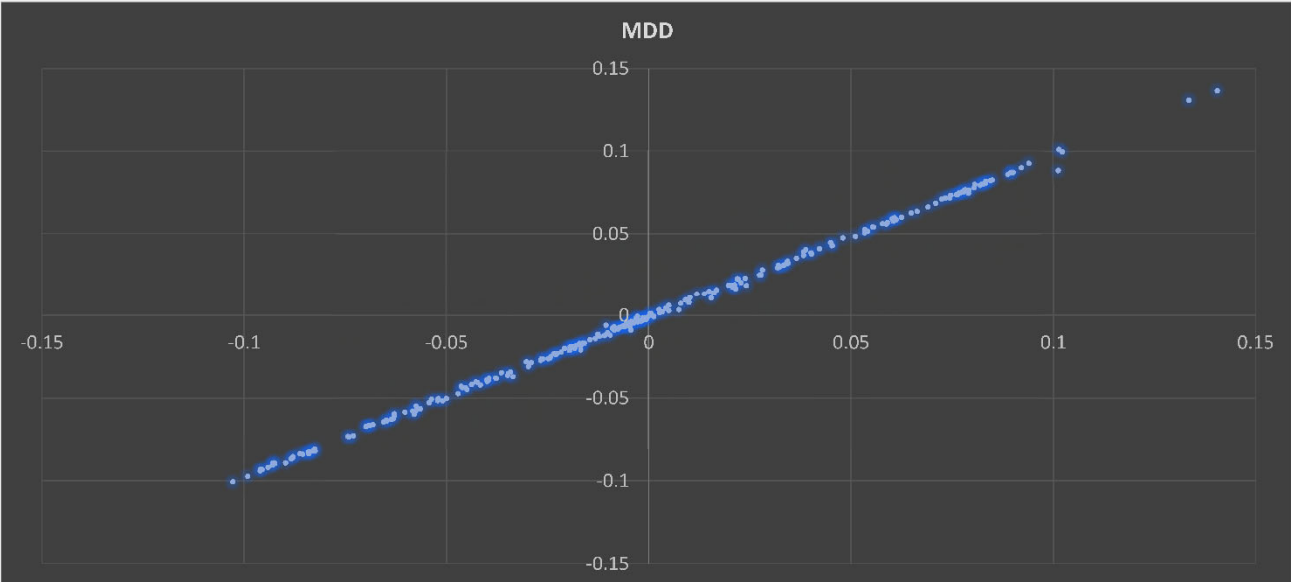

**eFigure 8. Significantly associated metabolites with MDD in model 4 and the results of replication in BBMRI-NL study**

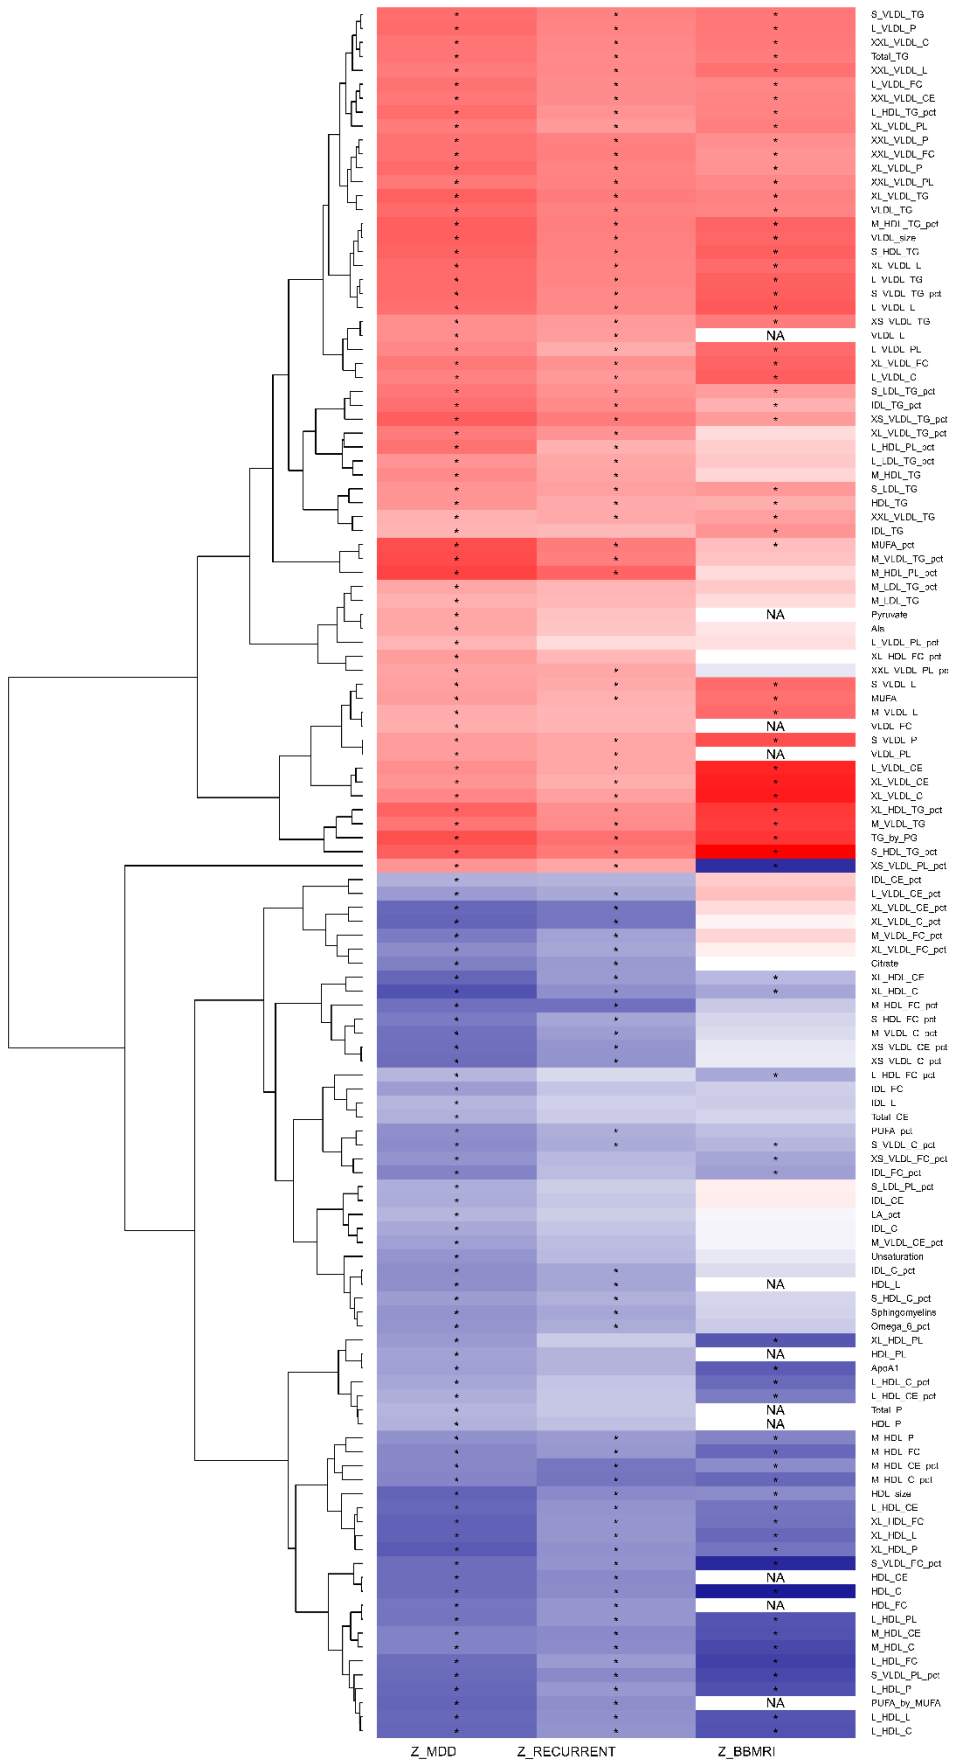





eFigure 9. Results of Mendelian Randomization for the 124 associated metabolites in model 4

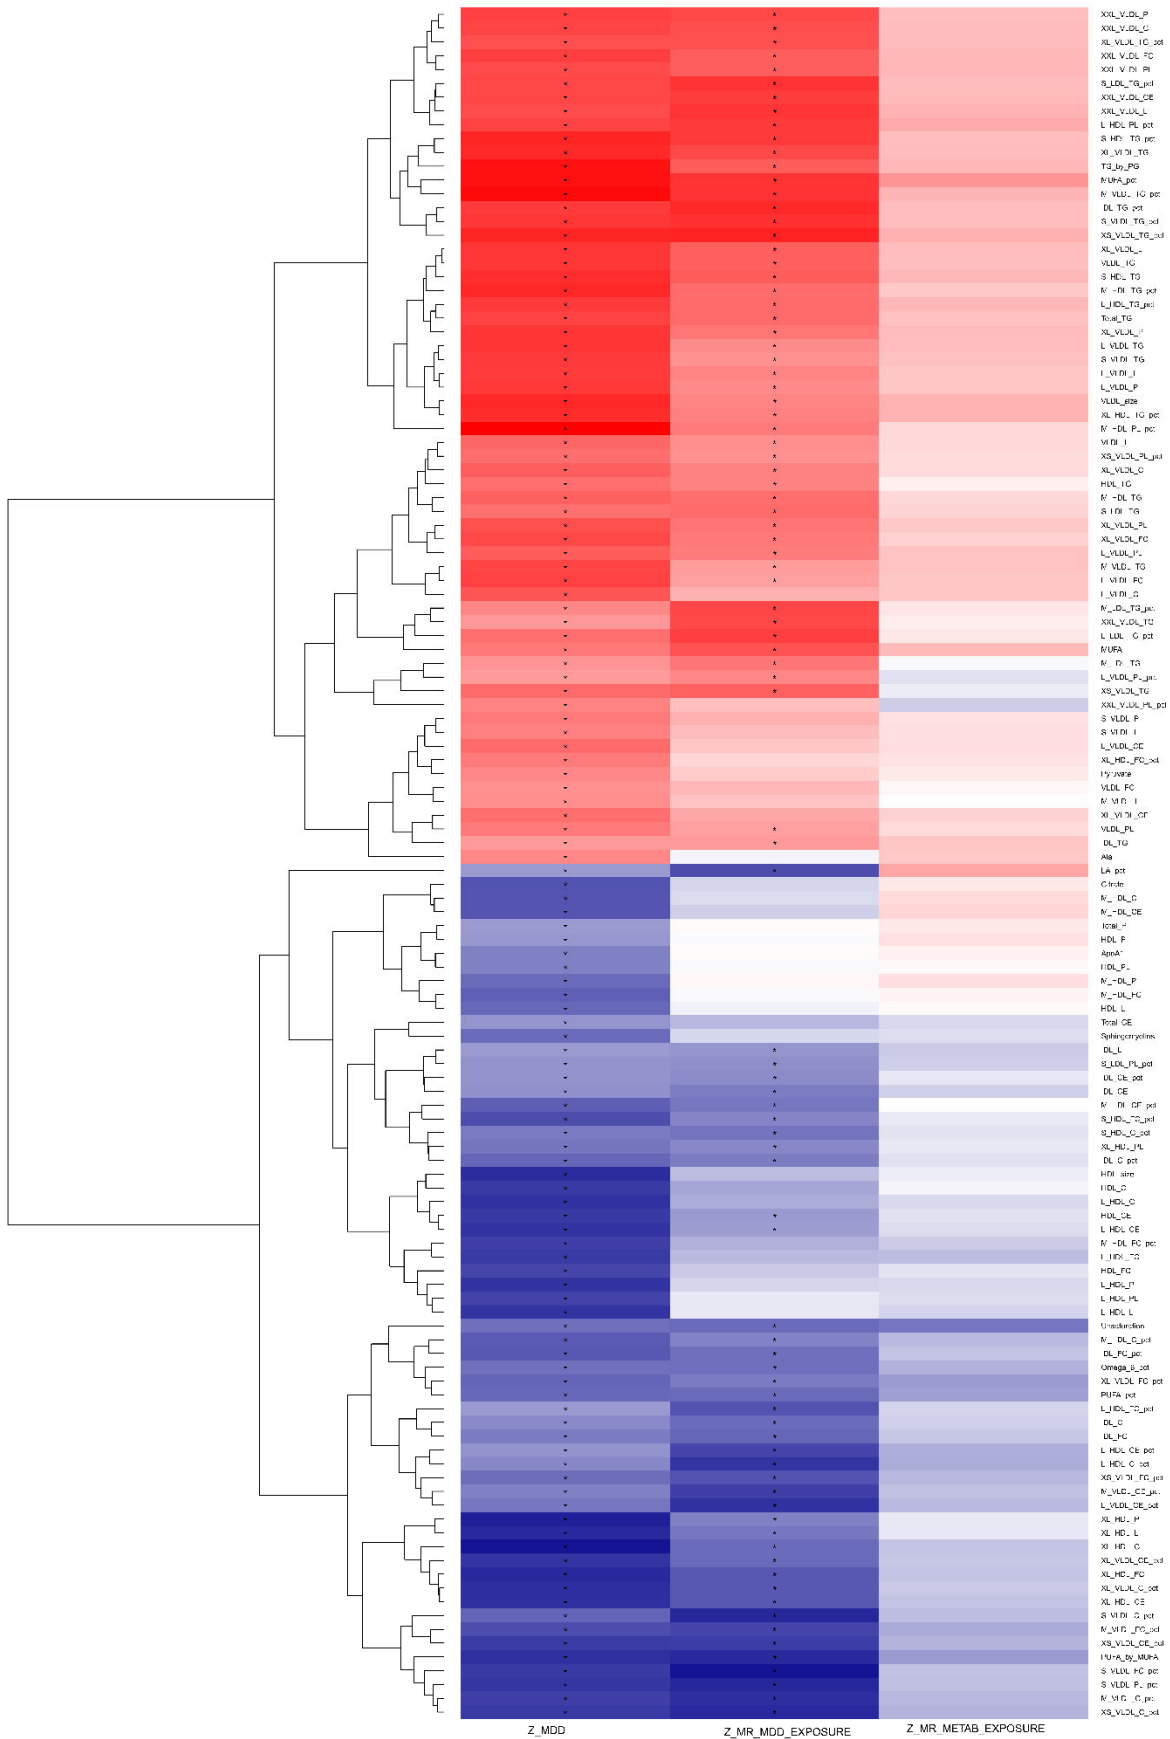

eFigure 10. Scatter plot of direct and proxy association of microbiome with major depression

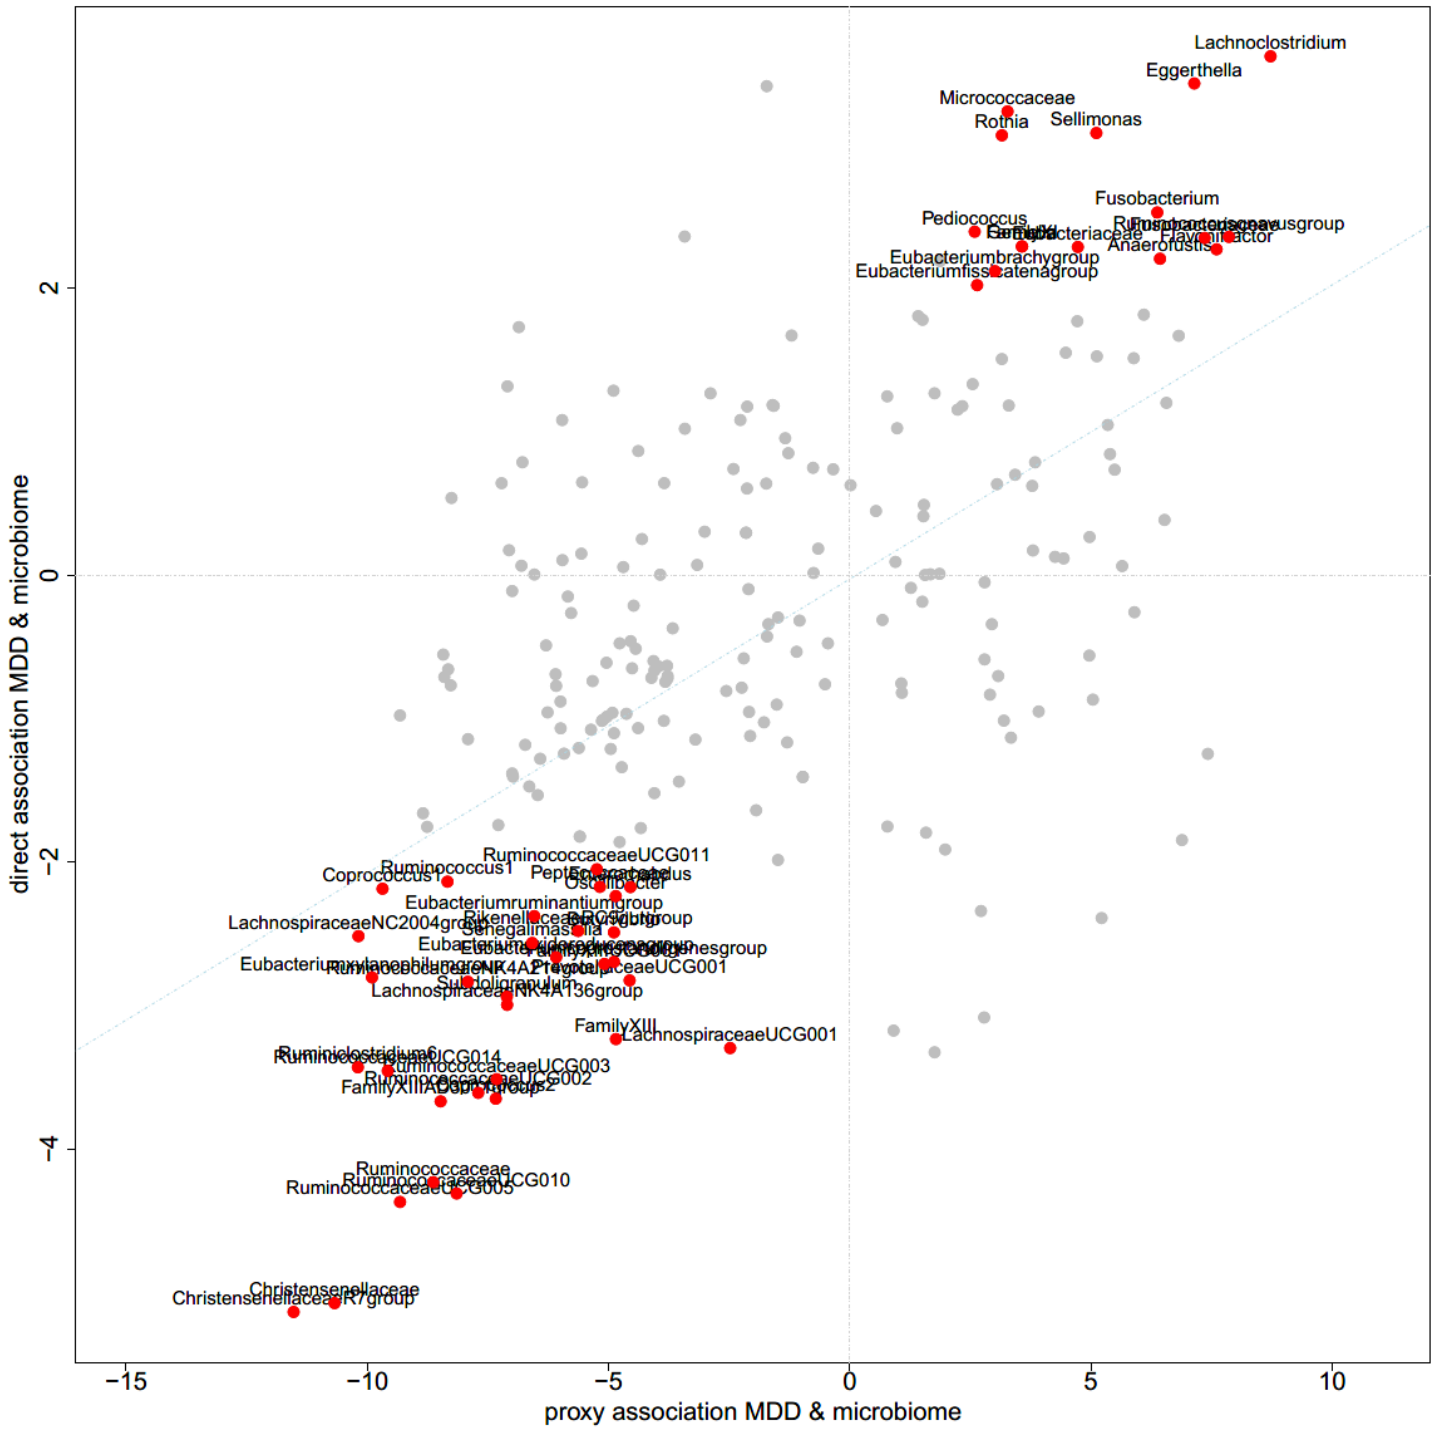

eFigure 11. Hierarchical illustration of all healthy and pathogenic bacteria that showed significant correlation ( $r > 0.3$  &  $FDR < 0.05$ ) with MDD metabolic signatures

### Gut microbiota in MDD

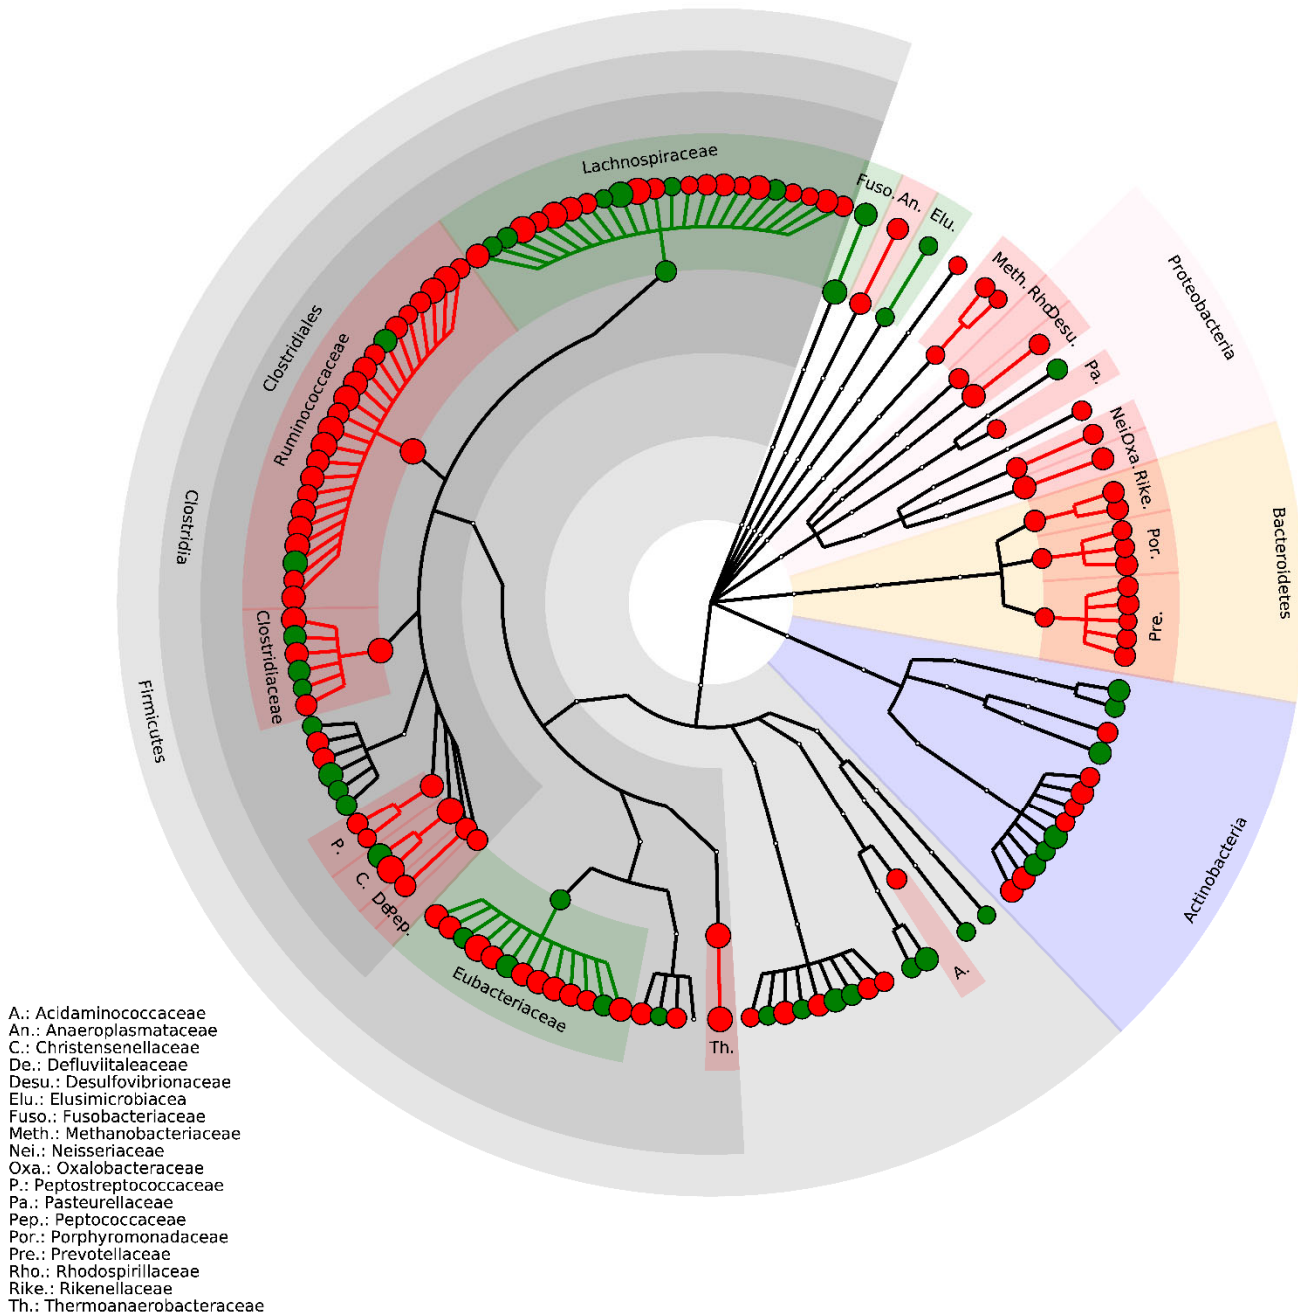

Supplement: jamapsychiatry-e230685-s001.pdf [file jamapsychiatry-e230685-s001.pdf]
