# Supplementary material
Source: PubMed Central journal article supplement (PMC10116384)
Supplement: jamapsychiatry-e230685-s002.pdf [file jamapsychiatry-e230685-s002.pdf]

## Data Sharing Statement

Amin. Interplay of Metabolome and Gut Microbiome in Individuals With Major Depressive Disorder vs Control Individuals. *JAMA Psychiatry*. Published April 19, 2023.

doi:10.1001/jamapsychiatry.2023.0685

### Data

**Data available:** Yes

**Data types:** Deidentified participant data

**How to access data:** All UK Biobank data is publicly accessible

(<https://www.ukbiobank.ac.uk/>). All results for this study are provided in the Supplement.

**When available:** With publication

### Supporting Documents

**Document types:** None

### Additional Information

**Who can access the data:** Researchers whose proposed use of the data has been approved.

**Types of analyses:** Researchers can submit a proposal to the UK Biobank access team.

**Mechanisms of data availability:** After approval of the proposal with a signed data access agreement and upon payment of the required fee.
